# Supplementary material
Source: Research Square preprint supplement (doi:10.21203/rs.3.rs-9490879/v1)
Supplement: Supplementary file 1 [file aaa47bef09c0da6da3c13200.xlsx]

## Sheet: List of Supplementary Tables
Supplementary Table 1: RNA-seq data (No treatment, HTVi-Empty, HTVi-YAP, AAV-YAP)
Supplementary Table 2: Primer sequences used for RT-qPCR

## Sheet: Supplementary_Table1
gene_id	transcript_id(s)	entrezgene_id(s)	gene_symbol(s)	description	chr	start	end	length	strand	No-treatment_1	No-treatment_2	No-treatment_3	HTVi_Empty_1	HTVi_Empty_2	HTVi_Empty_3	HTVi_YAP_1	HTVi_YAP_2	HTVi_YAP_3	HTVi_YAP_4	HTVi_YAP_5	AAV_YAP_1	AAV_YAP_2	AAV_YAP_3	AAV_YAP_4	AAV_YAP_5	AAV_YAP_6
ENSMUSG00000000001	ENSMUST00000000001	14679	Gnai3	G protein subunit alpha i3 [Source:MGI Symbol;Acc:MGI:95773]	3	108014596	108053462	38867	-	2661	2915	2946	2605	2284	2337	2511	2905	3214	2527	2054	2730	2422	2779	1568	2781	1767
ENSMUSG00000000028	ENSMUST00000000028;ENSMUST00000096990;ENSMUST00000115585;ENSMUST00000231819	12544	Cdc45	cell division cycle 45 [Source:MGI Symbol;Acc:MGI:1338073]	16	18599197	18630737	31541	-	23	22	20	38	45	17	85	145	130	47	100	21	16	20	8	23	10
ENSMUSG00000000031	ENSMUST00000132294;ENSMUST00000136359;ENSMUST00000140716;ENSMUST00000152754;ENSMUST00000228259;ENSMUST00000228514;ENSMUST00000246665;ENSMUST00000247195;ENSMUST00000247519;ENSMUST00000249623;ENSMUST00000249624;ENSMUST00000249625;ENSMUST00000249626;ENSMUST00000249627;ENSMUST00000249628;ENSMUST00000249629;ENSMUST00000299854;ENSMUST00000299855;ENSMUST00000299856;ENSMUST00000299857;ENSMUST00000299858	14955	H19	H19, imprinted maternally expressed transcript [Source:MGI Symbol;Acc:MGI:95891]	7	142129262	142133957	4696	-	3	1	18	4	5	2	82	9	2	24	164	5	1	1	0	2	0
ENSMUSG00000000037	ENSMUST00000019101;ENSMUST00000074802;ENSMUST00000077375;ENSMUST00000087090;ENSMUST00000101113;ENSMUST00000112345;ENSMUST00000124775;ENSMUST00000238361;ENSMUST00000238603	107815	Scml2	Scm polycomb group protein like 2 [Source:MGI Symbol;Acc:MGI:1340042]	X	159865521	160041209	175689	+	1	0	2	3	1	3	8	14	16	7	8	3	3	2	0	4	4
ENSMUSG00000000049	ENSMUST00000000049;ENSMUST00000133383;ENSMUST00000146050;ENSMUST00000152958	11818	Apoh	apolipoprotein H [Source:MGI Symbol;Acc:MGI:88058]	11	108234180	108305222	71043	+	38985	49800	45010	40594	38120	31006	39114	48738	42703	28737	37203	40837	39309	51002	24785	46686	23857
ENSMUSG00000000056	ENSMUST00000103015;ENSMUST00000151088;ENSMUST00000154047	67608	Narf	nuclear prelamin A recognition factor [Source:MGI Symbol;Acc:MGI:1914858]	11	121128079	121146682	18604	+	1390	1705	1305	1352	1151	1292	1399	1821	1785	1127	1584	799	737	1060	1150	2088	1522
ENSMUSG00000000058	ENSMUST00000000058;ENSMUST00000115459;ENSMUST00000115462	12390	Cav2	caveolin 2 [Source:MGI Symbol;Acc:MGI:107571]	6	17281184	17289114	7931	+	73	96	70	144	166	275	187	190	400	274	133	131	77	97	128	105	154
ENSMUSG00000000078	ENSMUST00000000080;ENSMUST00000221734;ENSMUST00000222857	23849	Klf6	Kruppel-like transcription factor 6 [Source:MGI Symbol;Acc:MGI:1346318]	13	5911481	5920393	8913	+	126	122	132	239	226	361	689	606	875	609	312	212	130	139	75	97	72
ENSMUSG00000000085	ENSMUST00000000087;ENSMUST00000064991;ENSMUST00000106298;ENSMUST00000106301;ENSMUST00000122860;ENSMUST00000132116;ENSMUST00000133169;ENSMUST00000133290;ENSMUST00000134375;ENSMUST00000136801;ENSMUST00000144555;ENSMUST00000144862;ENSMUST00000151345;ENSMUST00000153099	29871	Scmh1	sex comb on midleg homolog 1 [Source:MGI Symbol;Acc:MGI:1352762]	4	120262478	120387383	124906	+	224	235	272	198	169	79	252	340	116	61	242	183	207	235	63	200	105
ENSMUSG00000000088	ENSMUST00000000090;ENSMUST00000213678;ENSMUST00000214154	12858	Cox5a	cytochrome c oxidase subunit 5A [Source:MGI Symbol;Acc:MGI:88474]	9	57428557	57439709	11153	+	3442	3896	3424	4388	3902	4355	3050	3823	6941	5071	3234	3156	3098	3707	2286	2816	2619
ENSMUSG00000000093	ENSMUST00000000095	21385	Tbx2	T-box 2 [Source:MGI Symbol;Acc:MGI:98494]	11	85723377	85732774	9398	+	60	56	77	60	36	23	79	67	28	33	69	49	54	52	21	37	26
ENSMUSG00000000120	ENSMUST00000000122	18053	Ngfr	nerve growth factor receptor (TNFR superfamily, member 16) [Source:MGI Symbol;Acc:MGI:97323]	11	95459644	95478561	18918	-	58	61	82	40	32	16	20	80	17	15	50	75	80	93	11	29	22
ENSMUSG00000000126	ENSMUST00000000128;ENSMUST00000108783	216795	Wnt9a	wingless-type MMTV integration site family, member 9A [Source:MGI Symbol;Acc:MGI:2446084]	11	59197754	59224378	26625	+	6	8	27	15	17	9	24	33	20	11	19	7	18	18	19	26	20
ENSMUSG00000000127	ENSMUST00000000129;ENSMUST00000038080;ENSMUST00000232945;ENSMUST00000233190;ENSMUST00000233225	14158	Fer	FER tyrosine kinase [Source:MGI Symbol;Acc:MGI:105917]	17	64170057	64446491	276435	+	153	190	150	194	119	128	210	287	220	117	154	165	167	183	100	214	116
ENSMUSG00000000131	ENSMUST00000009344;ENSMUST00000163959;ENSMUST00000164741;ENSMUST00000165608;ENSMUST00000165660;ENSMUST00000166368;ENSMUST00000166538;ENSMUST00000166540;ENSMUST00000166719;ENSMUST00000167147;ENSMUST00000167268;ENSMUST00000167315;ENSMUST00000168189;ENSMUST00000168564;ENSMUST00000168649;ENSMUST00000168933;ENSMUST00000169059;ENSMUST00000170675;ENSMUST00000171861;ENSMUST00000206784	74204	Xpo6	exportin 6 [Source:MGI Symbol;Acc:MGI:2429950]	7	125700887	125799673	98787	-	908	806	826	614	668	218	1032	1156	400	222	861	975	776	1184	281	1021	440
ENSMUSG00000000134	ENSMUST00000077680;ENSMUST00000079542;ENSMUST00000101695;ENSMUST00000115677;ENSMUST00000115678;ENSMUST00000115679;ENSMUST00000115680;ENSMUST00000126694;ENSMUST00000132209;ENSMUST00000133456;ENSMUST00000137467;ENSMUST00000143680;ENSMUST00000144715;ENSMUST00000144900	209446	Tfe3	transcription factor E3 [Source:MGI Symbol;Acc:MGI:98511]	X	7628799	7641441	12643	+	619	571	719	406	337	187	841	809	356	178	597	881	636	840	164	437	240
ENSMUSG00000000142	ENSMUST00000052915;ENSMUST00000106711;ENSMUST00000139682;ENSMUST00000140821;ENSMUST00000144130;ENSMUST00000144511;ENSMUST00000152909	12006	Axin2	axin 2 [Source:MGI Symbol;Acc:MGI:1270862]	11	108811175	108841609	30435	+	253	118	102	115	113	55	82	180	78	36	121	160	198	258	66	156	65
ENSMUSG00000000148	ENSMUST00000041588;ENSMUST00000100505;ENSMUST00000110806;ENSMUST00000124892;ENSMUST00000131905;ENSMUST00000153440	231841	Brat1	BRCA1-associated ATM activator 1 [Source:MGI Symbol;Acc:MGI:1891679]	5	140690766	140705134	14369	+	177	170	224	187	130	77	325	256	107	51	234	306	222	330	61	180	123
ENSMUSG00000000149	ENSMUST00000000153;ENSMUST00000198447	14673	Gna12	guanine nucleotide binding protein, alpha 12 [Source:MGI Symbol;Acc:MGI:95767]	5	140744163	140816186	72024	-	3072	3495	2886	2885	2931	1155	4399	4723	1781	1055	4086	1947	2024	3652	1210	3201	1672
ENSMUSG00000000154	ENSMUST00000052348;ENSMUST00000105917;ENSMUST00000141988;ENSMUST00000145943;ENSMUST00000150791	18400	Slc22a18	solute carrier family 22 (organic cation transporter), member 18 [Source:MGI Symbol;Acc:MGI:1336884]	7	143027473	143053071	25599	+	2639	2473	3060	2080	2299	1372	3313	2932	2397	1569	3323	2531	2293	3296	1083	1931	1288
ENSMUSG00000000159	ENSMUST00000000163;ENSMUST00000081093;ENSMUST00000113794;ENSMUST00000136292;ENSMUST00000139595	72058	Igsf5	immunoglobulin superfamily, member 5 [Source:MGI Symbol;Acc:MGI:1919308]	16	96162868	96223321	60454	+	584	620.61	550	835.33	839	1127	784	806	2124.37	1496.71	665	781.13	648	800.99	734	876	812
ENSMUSG00000000167	ENSMUST00000000171;ENSMUST00000124029;ENSMUST00000125606;ENSMUST00000132187;ENSMUST00000141366;ENSMUST00000151197;ENSMUST00000155773	72614	Pih1d2	PIH1 domain containing 2 [Source:MGI Symbol;Acc:MGI:1919864]	9	50528621	50536300	7680	+	10	12	14	7	10	17	11	11	31	14	9	11	3	16	13	9	11
ENSMUSG00000000168	ENSMUST00000034567;ENSMUST00000125919;ENSMUST00000126933;ENSMUST00000132455;ENSMUST00000142275;ENSMUST00000155417	235339	Dlat	dihydrolipoamide S-acetyltransferase [Source:MGI Symbol;Acc:MGI:2385311]	9	50545933	50571080	25148	-	1078	1249	1013	1189	875	828	845	1330	1201	768	1007	1291	1276	1346	786	1397	868
ENSMUSG00000000171	ENSMUST00000000175	66925	Sdhd	succinate dehydrogenase complex, subunit D, integral membrane protein [Source:MGI Symbol;Acc:MGI:1914175]	9	50507657	50515112	7456	-	4492	5381	4680	6230	5265	6746	3937	4930	10090	7654	4339	4167	3984	4907	4082	3759	4917
ENSMUSG00000000184	ENSMUST00000000188;ENSMUST00000201066;ENSMUST00000201564;ENSMUST00000201637;ENSMUST00000201857;ENSMUST00000201902;ENSMUST00000201985;ENSMUST00000202363	12444	Ccnd2	cyclin D2 [Source:MGI Symbol;Acc:MGI:88314]	6	127102125	127129156	27032	-	105	150	123	117	115	109	206	264	173	82	134	201	131	190	66	148	54
ENSMUSG00000000194	ENSMUST00000056433;ENSMUST00000127872;ENSMUST00000133207;ENSMUST00000146747;ENSMUST00000147099;ENSMUST00000149622;ENSMUST00000151991;ENSMUST00000153032;ENSMUST00000169333;ENSMUST00000172422;ENSMUST00000194084	277463	Gpr107	G protein-coupled receptor 107 [Source:MGI Symbol;Acc:MGI:2139054]	2	31042328	31108787	66460	+	478	441	492	457	390	263	626	604	322	229	572	525	427	632	210	477	240
ENSMUSG00000000204	ENSMUST00000000208;ENSMUST00000167596;ENSMUST00000215472	20558	Slfn4	schlafen 4 [Source:MGI Symbol;Acc:MGI:1329010]	11	83066012	83081042	15031	+	2	4	0	4	9	30	52	66	151	19	29	13	4	0	2	2	3
ENSMUSG00000000244	ENSMUST00000009396;ENSMUST00000075172;ENSMUST00000082008;ENSMUST00000105923;ENSMUST00000105924;ENSMUST00000105925;ENSMUST00000141186;ENSMUST00000143512;ENSMUST00000145212;ENSMUST00000154264;ENSMUST00000207211;ENSMUST00000207449	27027	Tspan32	tetraspanin 32 [Source:MGI Symbol;Acc:MGI:1350360]	7	142558783	142573381	14599	+	2	5	2	8	11	11	41	29	65	16	22	7	0	3	1	2	4
ENSMUSG00000000247	ENSMUST00000000253;ENSMUST00000133661;ENSMUST00000143783;ENSMUST00000149664;ENSMUST00000155964;ENSMUST00000175896;ENSMUST00000176229	16870	Lhx2	LIM homeobox protein 2 [Source:MGI Symbol;Acc:MGI:96785]	2	38229293	38259745	30453	+	35	39	49	38	22	20	17	44	21	9	30	59	67	78	27	45	21
ENSMUSG00000000253	ENSMUST00000000260;ENSMUST00000128873;ENSMUST00000129176;ENSMUST00000222227	66355	Gmpr	guanosine monophosphate reductase [Source:MGI Symbol;Acc:MGI:1913605]	13	45660920	45707276	46357	+	19	12	14	22	22	28	39	20	36	28	27	25	7	18	7	10	5
ENSMUSG00000000266	ENSMUST00000112988;ENSMUST00000112990;ENSMUST00000112993;ENSMUST00000128809;ENSMUST00000140144	23947	Mid2	midline 2 [Source:MGI Symbol;Acc:MGI:1344333]	X	139565348	139668464	103117	+	158	189	162	268	220	195	249	265	309	184	218	166	169	221	88	255	133
ENSMUSG00000000275	ENSMUST00000000284;ENSMUST00000100627;ENSMUST00000107896	217069	Trim25	tripartite motif-containing 25 [Source:MGI Symbol;Acc:MGI:102749]	11	88890202	88911119	20918	+	2186	1869	2044	2195	2331	2040	2704	2263	2856	2274	2291	2260	1334	2490	1348	1866	1179
ENSMUSG00000000276	ENSMUST00000000285;ENSMUST00000107894;ENSMUST00000152772	56077	Dgke	diacylglycerol kinase, epsilon [Source:MGI Symbol;Acc:MGI:1889276]	11	88926005	88957676	31672	-	39	33	46	60	48	44	60	63	48	37	51	61	48	54	26	69	37
ENSMUSG00000000278	ENSMUST00000000287	74617	Scpep1	serine carboxypeptidase 1 [Source:MGI Symbol;Acc:MGI:1921867]	11	88814846	88846291	31446	-	640	655	802	743	657	740	901	793	1059	714	926	790	673	924	454	513	443
ENSMUSG00000000282	ENSMUST00000000291;ENSMUST00000132150;ENSMUST00000133217	17428	Mnt	max binding protein [Source:MGI Symbol;Acc:MGI:109150]	11	74721746	74736551	14806	+	207	259	194	112	145	50	456	436	114	34	273	345	267	435	58	95	107
ENSMUSG00000000290	ENSMUST00000000299;ENSMUST00000130059;ENSMUST00000131023;ENSMUST00000153541;ENSMUST00000156644	16414	Itgb2	integrin beta 2 [Source:MGI Symbol;Acc:MGI:96611]	10	77366086	77401542	35457	+	62	77	65	128	156	136	528	533	346	134	257	101	36	76	31	39	32
ENSMUSG00000000295	ENSMUST00000000304;ENSMUST00000159194;ENSMUST00000159659;ENSMUST00000160447;ENSMUST00000162076	69692	Hddc2	HD domain containing 2 [Source:MGI Symbol;Acc:MGI:1916942]	10	31189379	31204200	14822	+	15	20	13	33	28	52	35	33	81	58	24	19	18	22	15	28	31
ENSMUSG00000000296	ENSMUST00000000305;ENSMUST00000213528;ENSMUST00000213639;ENSMUST00000214644;ENSMUST00000215515	21987	Tpd52l1	tumor protein D52-like 1 [Source:MGI Symbol;Acc:MGI:1298386]	10	31208372	31321954	113583	-	162	200	156	247	209	215	154	171	352	289	159	135	111	141	122	186	169
ENSMUSG00000000301	ENSMUST00000000310;ENSMUST00000102692;ENSMUST00000102693;ENSMUST00000133028;ENSMUST00000136660;ENSMUST00000143646;ENSMUST00000146461;ENSMUST00000147422;ENSMUST00000148512;ENSMUST00000150954	18618	Pemt	phosphatidylethanolamine N-methyltransferase [Source:MGI Symbol;Acc:MGI:104535]	11	59861440	59937315	75876	-	5250	5802	5332	5199	4802	5496	3859	4820	6565	5263	4286	5529	5120	6605	3214	4371	3906
ENSMUSG00000000303	ENSMUST00000000312;ENSMUST00000136580	12550	Cdh1	cadherin 1 [Source:MGI Symbol;Acc:MGI:88354]	8	107329983	107396878	66896	+	1637	1245	2237	1436	995	860	1677	1978	1070	719	2082	2478	1247	1590	466	1559	808
ENSMUSG00000000317	ENSMUST00000000326;ENSMUST00000140542;ENSMUST00000153449	12029	Bcl6b	B cell CLL/lymphoma 6, member B [Source:MGI Symbol;Acc:MGI:1278332]	11	70114954	70120624	5671	-	34	42	54	60	44	41	122	111	46	59	105	57	41	41	26	35	18
ENSMUSG00000000318	ENSMUST00000000327;ENSMUST00000102571;ENSMUST00000143298;ENSMUST00000144935;ENSMUST00000150966;ENSMUST00000152635;ENSMUST00000153959;ENSMUST00000178567;ENSMUST00000178945;ENSMUST00000180106	17312	Clec10a	C-type lectin domain family 10, member A [Source:MGI Symbol;Acc:MGI:96975]	11	70047023	70061660	14638	+	13	3	10	10	23	26	73	23	43	27	33	8	7	4	4	6	4
ENSMUSG00000000320	ENSMUST00000000329;ENSMUST00000108574	11684	Alox12	arachidonate 12-lipoxygenase [Source:MGI Symbol;Acc:MGI:87998]	11	70132283	70146179	13897	-	8	3	7	25	25	24	31	30	19	23	19	36	9	18	4	3	5
ENSMUSG00000000326	ENSMUST00000000335;ENSMUST00000115609;ENSMUST00000147720;ENSMUST00000165430	12846	Comt	catechol-O-methyltransferase [Source:MGI Symbol;Acc:MGI:88470]	16	18225636	18245602	19967	-	20657	13710	13016	20874	18174	18209	17323	25379	27614	14212	12469	27873	16748	27618	15201	17753	14652
ENSMUSG00000000339	ENSMUST00000000348;ENSMUST00000124486;ENSMUST00000140677;ENSMUST00000143425;ENSMUST00000153005	66368	Rtca	RNA 3'-terminal phosphate cyclase [Source:MGI Symbol;Acc:MGI:1913618]	3	116282612	116301857	19246	-	239	277	228	317	239	167	277	367	356	198	309	255	218	289	161	270	190
ENSMUSG00000000340	ENSMUST00000000349;ENSMUST00000196376;ENSMUST00000197201;ENSMUST00000199614	13171	Dbt	dihydrolipoamide branched chain transacylase E2 [Source:MGI Symbol;Acc:MGI:105386]	3	116306719	116343630	36912	+	2807	3333	3519	3713	3094	2882	2889	3039	4736	3758	3235	2541	2716	3025	2365	4138	2793
ENSMUSG00000000346	ENSMUST00000000356;ENSMUST00000229424;ENSMUST00000230384;ENSMUST00000230661	23994	Dazap2	DAZ associated protein 2 [Source:MGI Symbol;Acc:MGI:1344344]	15	100513230	100518642	5413	+	3119	3343	3151.97	3391	3207	2726	3521	3811.93	3958	2621	2928	3088	2709	3495	1707	2835	1891
ENSMUSG00000000355	ENSMUST00000000365;ENSMUST00000133128;ENSMUST00000134573;ENSMUST00000140204;ENSMUST00000148938	68995	Mcts1	malignant T cell amplified sequence 1 [Source:MGI Symbol;Acc:MGI:1916245]	X	37689455	37702303	12849	+	502	544	405	597	486	643	421	559	1043	581	372	466	417	442	455	584	440
ENSMUSG00000000359	ENSMUST00000000369;ENSMUST00000139370;ENSMUST00000150913	19700	Rem1	rad and gem related GTP binding protein 1 [Source:MGI Symbol;Acc:MGI:1097696]	2	152468871	152477118	8248	+	3	7	9	22	12	13	12	12	23	10	13	6	8	7	5	3	2
ENSMUSG00000000374	ENSMUST00000000384;ENSMUST00000217858;ENSMUST00000217980;ENSMUST00000218124;ENSMUST00000219948	216131	Trappc10	trafficking protein particle complex 10 [Source:MGI Symbol;Acc:MGI:1336209]	10	78022559	78080475	57917	-	539	523	520	472	506	338	609	693	521	330	523	691	544	725	251	618	354
ENSMUSG00000000378	ENSMUST00000000388;ENSMUST00000109721;ENSMUST00000109722;ENSMUST00000144293;ENSMUST00000159007;ENSMUST00000160633;ENSMUST00000161501;ENSMUST00000161667	216527	Ccm2	cerebral cavernous malformation 2 [Source:MGI Symbol;Acc:MGI:2384924]	11	6496887	6546744	49858	+	481	493	484	395	391	294	572	530	440	304	446	554	430	567	257	397	248
ENSMUSG00000000384	ENSMUST00000000394;ENSMUST00000131313;ENSMUST00000131477;ENSMUST00000131815;ENSMUST00000132446;ENSMUST00000134016;ENSMUST00000136682;ENSMUST00000144463;ENSMUST00000150697;ENSMUST00000151008;ENSMUST00000156969;ENSMUST00000189268	21379	Tbrg4	transforming growth factor beta regulated gene 4 [Source:MGI Symbol;Acc:MGI:1100868]	11	6565598	6576067	10470	-	769	849	803	617	574	311	758	968	572	329	852	943	699	965	331	882	539.01
ENSMUSG00000000385	ENSMUST00000000395;ENSMUST00000231544;ENSMUST00000231715;ENSMUST00000231908;ENSMUST00000232141;ENSMUST00000232599	50528	Tmprss2	transmembrane protease, serine 2 [Source:MGI Symbol;Acc:MGI:1354381]	16	97365882	97412395	46514	-	120	84	147	105	139	121	247	161	133	115	158	137	101	128	47	76	34
ENSMUSG00000000386	ENSMUST00000113768;ENSMUST00000135184;ENSMUST00000155233;ENSMUST00000231455;ENSMUST00000231461;ENSMUST00000231995;ENSMUST00000238205;ENSMUST00000238262;ENSMUST00000247756;ENSMUST00000247757	NA	Mx1	MX dynamin-like GTPase 1 [Source:MGI Symbol;Acc:MGI:97243]	16	97248235	97264107	15873	-	28	51	28	50	43	50	119	131.42	136	51	54	32	16	17	21	23	23
ENSMUSG00000000399	ENSMUST00000088194;ENSMUST00000200890;ENSMUST00000205002	66108	Ndufa9	NADH:ubiquinone oxidoreductase subunit A9 [Source:MGI Symbol;Acc:MGI:1913358]	6	126798684	126826099	27416	-	3052	3584	3122	3820	3384	3262	2959	3399	5515	3689	2964	2714	2581	3383	2365	3208	2441
ENSMUSG00000000409	ENSMUST00000067240;ENSMUST00000102596;ENSMUST00000123640;ENSMUST00000127943;ENSMUST00000132030;ENSMUST00000134336;ENSMUST00000139957;ENSMUST00000167288	16818	Lck	lymphocyte protein tyrosine kinase [Source:MGI Symbol;Acc:MGI:96756]	4	129442137	129467434	25298	-	14	8	11	15	18	18	23	26	22	23	19	10	7	9	9	5	2
ENSMUSG00000000420	ENSMUST00000000430;ENSMUST00000164066;ENSMUST00000164998;ENSMUST00000169474;ENSMUST00000170191;ENSMUST00000170243;ENSMUST00000171583;ENSMUST00000178605	14423	Galnt1	polypeptide N-acetylgalactosaminyltransferase 1 [Source:MGI Symbol;Acc:MGI:894693]	18	24338401	24419875	81475	+	1278	1263	1237	1349	1248	1051	1382	1624	1620	1066	1264	1182	1079	1456	786	1492	691
ENSMUSG00000000439	ENSMUST00000000449;ENSMUST00000204409;ENSMUST00000205248	67027	Mkrn2	makorin, ring finger protein, 2 [Source:MGI Symbol;Acc:MGI:1914277]	6	115578863	115599585	20723	+	352	375	323	350	268	231	370	459	321	210	332	389	330	439	141	353	244
ENSMUSG00000000440	ENSMUST00000000450;ENSMUST00000171644;ENSMUST00000203308;ENSMUST00000203732;ENSMUST00000203896;ENSMUST00000204305;ENSMUST00000205213	19016	Pparg	peroxisome proliferator activated receptor gamma [Source:MGI Symbol;Acc:MGI:97747]	6	115337912	115467360	129449	+	129	167	91	229	244	138	258	183	399	104	223	86	118	159	80	191	100
ENSMUSG00000000441	ENSMUST00000000451;ENSMUST00000112949;ENSMUST00000124553;ENSMUST00000127503;ENSMUST00000130528;ENSMUST00000147979;ENSMUST00000203142;ENSMUST00000203276;ENSMUST00000203759;ENSMUST00000203826;ENSMUST00000204512	110157	Raf1	v-raf-leukemia viral oncogene 1 [Source:MGI Symbol;Acc:MGI:97847]	6	115595028	115653596	58569	-	2285	2140	2194	2141	2135	1735	2038	2881	2735	1773	1948	2102	1846	2641	1224	2200	1454
ENSMUSG00000000486	ENSMUST00000106313;ENSMUST00000106314;ENSMUST00000131208;ENSMUST00000133591;ENSMUST00000133733;ENSMUST00000133913;ENSMUST00000138541;ENSMUST00000142356;ENSMUST00000152267;ENSMUST00000205570	54204;100043580	Septin1	septin 1 [Source:MGI Symbol;Acc:MGI:1858916]	7	126813619	126832302	18684	-	27	15	23	37	10	19	39	30	27	23	39	23	19	29	4	9	11
ENSMUSG00000000489	ENSMUST00000000500;ENSMUST00000229168;ENSMUST00000229795;ENSMUST00000229912	18591	Pdgfb	platelet derived growth factor, B polypeptide [Source:MGI Symbol;Acc:MGI:97528]	15	79880075	79899178	19104	-	15	11	32	25	37	12	171	68	35	44	73	28	20	33	11	18	14
ENSMUSG00000000530	ENSMUST00000000542;ENSMUST00000117984;ENSMUST00000119063;ENSMUST00000120028;ENSMUST00000120754;ENSMUST00000121718;ENSMUST00000124151;ENSMUST00000128525;ENSMUST00000128868;ENSMUST00000130432;ENSMUST00000144229	11482	Acvrl1	activin A receptor, type II-like 1 [Source:MGI Symbol;Acc:MGI:1338946]	15	101026403	101043217	16815	+	35	42	47	65	71	53	137	121	76	47	91	53	25	58	13	23	8
ENSMUSG00000000531	ENSMUST00000000543	56149	Tamalin	trafficking regulator and scaffold protein tamalin [Source:MGI Symbol;Acc:MGI:1860303]	15	101122069	101130637	8569	+	18	20	21	24	19	20	39	24	27	21	18	18	15	24	4	12	8
ENSMUSG00000000532	ENSMUST00000000544	11479	Acvr1b	activin A receptor, type 1B [Source:MGI Symbol;Acc:MGI:1338944]	15	101071948	101111565	39618	+	334	361	301	321	327	151	424	590	267	125	379	333	341	428	192	507	325
ENSMUSG00000000538	ENSMUST00000064019;ENSMUST00000093046;ENSMUST00000093048;ENSMUST00000095254;ENSMUST00000102682;ENSMUST00000102683;ENSMUST00000133420;ENSMUST00000142225;ENSMUST00000143124;ENSMUST00000151284;ENSMUST00000153920	216810	Tom1l2	target of myb1-like 2 (chicken) [Source:MGI Symbol;Acc:MGI:2443306]	11	60117540	60243731	126192	-	793	771	720	525	530	270	810	971	291	180	827	645	522	799	276	834	442
ENSMUSG00000000552	ENSMUST00000168828;ENSMUST00000229373;ENSMUST00000229551	29813	Zfp385a	zinc finger protein 385A [Source:MGI Symbol;Acc:MGI:1352495]	15	103222322	103248520	26199	-	468	331	340	252	318	103	648	522	180	74	387	702	533	785	89	188	159
ENSMUSG00000000555	ENSMUST00000023128;ENSMUST00000215331;ENSMUST00000230460;ENSMUST00000230775	16402	Itga5	integrin alpha 5 (fibronectin receptor alpha) [Source:MGI Symbol;Acc:MGI:96604]	15	103252713	103275190	22478	-	433	363	622	458	370	139	846	768	278	152	582	832	747	741	93	314	166
ENSMUSG00000000561	ENSMUST00000010278;ENSMUST00000127464;ENSMUST00000128005;ENSMUST00000130994;ENSMUST00000151263	70465	Wdr77	WD repeat domain 77 [Source:MGI Symbol;Acc:MGI:1917715]	3	105866685	105877353	10669	+	632.5	693.18	595	717.81	669.74	580.73	786.77	952.66	1107	725.09	693.23	1032.4	703.98	873.09	469.39	973.67	566.83
ENSMUSG00000000563	ENSMUST00000118209;ENSMUST00000123959;ENSMUST00000133320;ENSMUST00000143022;ENSMUST00000153666;ENSMUST00000199311	11950	Atp5pb	ATP synthase peripheral stalk-membrane subunit b [Source:MGI Symbol;Acc:MGI:1100495]	3	105850014	105867415	17402	-	7637	9303	7964.99	11876	10021	12573	7648.99	9185.99	21289	16133	7931	6889	7095	8494	7845.96	8252.92	8196.99
ENSMUSG00000000567	ENSMUST00000000579	20682	Sox9	SRY (sex determining region Y)-box 9 [Source:MGI Symbol;Acc:MGI:98371]	11	112673050	112678586	5537	+	99	65	70	80	77	51	274	96	42	37	146	287	137	186	30	117	33
ENSMUSG00000000568	ENSMUST00000019128;ENSMUST00000072750;ENSMUST00000112939;ENSMUST00000164833;ENSMUST00000168396;ENSMUST00000170654;ENSMUST00000170912;ENSMUST00000171106;ENSMUST00000171640;ENSMUST00000171786;ENSMUST00000172361	11991	Hnrnpd	heterogeneous nuclear ribonucleoprotein D [Source:MGI Symbol;Acc:MGI:101947]	5	100103794	100126797	23004	-	877	986	933	849	658	510	1100	1462	772	421	789	962	771	919	300	968	422
ENSMUSG00000000579	ENSMUST00000092966;ENSMUST00000124894;ENSMUST00000138598;ENSMUST00000149027	100040563	Dynlt1c	dynein light chain Tctex-type 1C [Source:MGI Symbol;Acc:MGI:3807476]	17	6869070	6877173	8104	+	18.73	39.15	35.04	62.34	33.87	49.09	65.62	53.73	107.2	108.75	66.15	47.69	46.59	45.04	18.98	38.76	31.86
ENSMUSG00000000581	ENSMUST00000000594;ENSMUST00000130330;ENSMUST00000131227;ENSMUST00000135568;ENSMUST00000156784	57316	C1d	C1D nuclear receptor co-repressor [Source:MGI Symbol;Acc:MGI:1927354]	11	17207579	17219176	11598	+	878	1052	906	1665	1415	2186	996	1039	3713	2833	890	803	806	924	1075	1172	1261
ENSMUSG00000000594	ENSMUST00000000608	14667	Gm2a	GM2 ganglioside activator protein [Source:MGI Symbol;Acc:MGI:95762]	11	54988941	55003855	14915	+	4077	3991	5431	3295	2746	2841	4897	5259	5101	3490	4889	3704	3062	3577	1796	2894	2540
ENSMUSG00000000600	ENSMUST00000080085;ENSMUST00000171023;ENSMUST00000196098;ENSMUST00000197611;ENSMUST00000197742;ENSMUST00000198079;ENSMUST00000199234;ENSMUST00000199475;ENSMUST00000199845;ENSMUST00000200004;ENSMUST00000200386;ENSMUST00000200577	79264	Krit1	KRIT1, ankyrin repeat containing [Source:MGI Symbol;Acc:MGI:1930618]	5	3853184	3895564	42381	+	353	395	379	417	358	284	349	412	537	417	327	516	424	467	252	537	296
ENSMUSG00000000605	ENSMUST00000000619;ENSMUST00000209916;ENSMUST00000210061;ENSMUST00000210362;ENSMUST00000210444;ENSMUST00000210594;ENSMUST00000210809;ENSMUST00000210989;ENSMUST00000211551;ENSMUST00000211574	12727	Clcn4	chloride channel, voltage-sensitive 4 [Source:MGI Symbol;Acc:MGI:104571]	7	7285308	7303850	18543	-	1544	1654	1547	1605	1457	1399	1278	1439	1923	1361	1071	1670	1374	1877	1106	1529	1231
ENSMUSG00000000628	ENSMUST00000000642;ENSMUST00000168725;ENSMUST00000169270;ENSMUST00000170833	15277	Hk2	hexokinase 2 [Source:MGI Symbol;Acc:MGI:1315197]	6	82702006	82751435	49430	-	18	17	14	13	17	21	81	96	55	23	43	21	12	24	4	14	4
ENSMUSG00000000631	ENSMUST00000000645;ENSMUST00000092884;ENSMUST00000092887;ENSMUST00000100443;ENSMUST00000100794;ENSMUST00000100795;ENSMUST00000102488;ENSMUST00000108375;ENSMUST00000108376;ENSMUST00000130305;ENSMUST00000130627;ENSMUST00000130956;ENSMUST00000134196;ENSMUST00000135045;ENSMUST00000135375;ENSMUST00000142571;ENSMUST00000151373;ENSMUST00000154892;ENSMUST00000164315;ENSMUST00000164334;ENSMUST00000167856;…	360013	Myo18a	myosin XVIIIA [Source:MGI Symbol;Acc:MGI:2667185]	11	77654072	77756806	102735	+	2396	2009	2392	1244	1072	517	3043	3034	662	409	2545	2389	1539	2415	535	2291	839
ENSMUSG00000000673	ENSMUST00000000687;ENSMUST00000234214;ENSMUST00000234312;ENSMUST00000234750;ENSMUST00000234823;ENSMUST00000234863	107766	Haao	3-hydroxyanthranilate 3,4-dioxygenase [Source:MGI Symbol;Acc:MGI:1349444]	17	84138585	84155392	16808	-	10777	12816	10440	13790	10773	12743	7689	9275	15365	10285	6329	10149	9634	12574	7736	8694	7434
ENSMUSG00000000682	ENSMUST00000000696;ENSMUST00000137445;ENSMUST00000145122	23833	Cd52	CD52 antigen [Source:MGI Symbol;Acc:MGI:1346088]	4	133809759	133822393	12635	-	37	43	41	93	108	158	256	207	483	164	129	55	33	38	21	15	13
ENSMUSG00000000686	ENSMUST00000094004;ENSMUST00000145676;ENSMUST00000147386	67477	Abhd15	abhydrolase domain containing 15 [Source:MGI Symbol;Acc:MGI:1914727]	11	77405947	77429433	23487	+	457	554	539	705	601	372	714	874	519	423	705	478	536	882	366	635	489
ENSMUSG00000000693	ENSMUST00000000707;ENSMUST00000101257;ENSMUST00000152679;ENSMUST00000155502;ENSMUST00000204318	16950	Loxl3	lysyl oxidase-like 3 [Source:MGI Symbol;Acc:MGI:1337004]	6	83011154	83029543	18390	+	23	18	27	46	34	55	70	57	60	41	43	27	20	42	18	27	25
ENSMUSG00000000708	ENSMUST00000000724;ENSMUST00000163648;ENSMUST00000164390;ENSMUST00000166525;ENSMUST00000167092;ENSMUST00000171072;ENSMUST00000172160	18519	Kat2b	K(lysine) acetyltransferase 2B [Source:MGI Symbol;Acc:MGI:1343094]	17	53873889	53979748	105860	+	2242	2455	2115	2698	2278	2264	1831	2863	3121	2270	1839	1962	1939	2293	1933	3322	2033
ENSMUSG00000000711	ENSMUST00000000727;ENSMUST00000220593	19344	Rab5b	RAB5B, member RAS oncogene family [Source:MGI Symbol;Acc:MGI:105938]	10	128513044	128532133	19090	-	2513	2771.98	2360.97	2418.97	2240	1806.97	2176.97	2926.98	2484	1494	1953.97	2287.01	2164	2811.95	1676.92	2247.94	1882.98
ENSMUSG00000000732	ENSMUST00000105393;ENSMUST00000217675;ENSMUST00000219038;ENSMUST00000219633	50723	Icosl	icos ligand [Source:MGI Symbol;Acc:MGI:1354701]	10	77905136	77919747	14612	+	16	19	18	17	16	23	59	59	29	23	50	21	12	15	5	14	7
ENSMUSG00000000738	ENSMUST00000108868;ENSMUST00000125975;ENSMUST00000128234;ENSMUST00000128803;ENSMUST00000130787;ENSMUST00000135991;ENSMUST00000142150;ENSMUST00000142541;ENSMUST00000149248;ENSMUST00000152972;ENSMUST00000153285;ENSMUST00000153492;ENSMUST00000212364	234847	Spg7	SPG7, paraplegin matrix AAA peptidase subunit [Source:MGI Symbol;Acc:MGI:2385906]	8	123789681	123824499	34819	+	1052	1051	1083	1033	942	670	1266	1208	957	671	1229	1043	1020	1344	474	1016	623
ENSMUSG00000000739	ENSMUST00000000755;ENSMUST00000122819;ENSMUST00000126951;ENSMUST00000137998;ENSMUST00000146007;ENSMUST00000152722	57429	Sult5a1	sulfotransferase family 5A, member 1 [Source:MGI Symbol;Acc:MGI:1931463]	8	123866931	123885054	18124	-	473	444	195	190	208	195	59	154	155	22	29	168	196	273	128	165	190
ENSMUSG00000000740	ENSMUST00000000756;ENSMUST00000129311;ENSMUST00000132275;ENSMUST00000152444;ENSMUST00000212887	270106	Rpl13	ribosomal protein L13 [Source:MGI Symbol;Acc:MGI:105922]	8	123829089	123831983	2895	+	4931.74	5787.69	4874.43	7256.57	5991.67	10878.9	6227.8	6093.84	14982.4	12538.6	5901.75	6431.09	4504.3	6504.58	4597.37	3919.44	5486.5
ENSMUSG00000000743	ENSMUST00000000759;ENSMUST00000167655;ENSMUST00000172336;ENSMUST00000212107	234852	Chmp1a	charged multivesicular body protein 1A [Source:MGI Symbol;Acc:MGI:1920159]	8	123931003	123939502	8500	-	1467	1521	1489	1701	1593	1266	1810	1757	2065	1388	1686	1377	1159	1585	853	1029	992
ENSMUSG00000000751	ENSMUST00000000767;ENSMUST00000092907;ENSMUST00000135770;ENSMUST00000149365;ENSMUST00000154894	68275	Rpa1	replication protein A1 [Source:MGI Symbol;Acc:MGI:1915525]	11	75188992	75239150	50159	-	602	610	523	939	765	862	1090	1497	1586	1015	1010	688	653	780	393	645	420
ENSMUSG00000000753	ENSMUST00000000769;ENSMUST00000125982;ENSMUST00000137103;ENSMUST00000138661;ENSMUST00000139403;ENSMUST00000155009;ENSMUST00000167281;ENSMUST00000168902	20317	Serpinf1	serine (or cysteine) peptidase inhibitor, clade F, member 1 [Source:MGI Symbol;Acc:MGI:108080]	11	75300595	75313527	12933	-	15546	16521	15931	13531	12159	8847	13308	16314	13050	9112	13170	13118	12286	16699	6597	12264	7332
ENSMUSG00000000759	ENSMUST00000000776;ENSMUST00000164611;ENSMUST00000164774;ENSMUST00000164861;ENSMUST00000164971;ENSMUST00000165321;ENSMUST00000167547;ENSMUST00000168657;ENSMUST00000172056	259279	Tubgcp3	tubulin, gamma complex component 3 [Source:MGI Symbol;Acc:MGI:2183752]	8	12664277	12722248	57972	-	312	367	308	411	350	406	355	418	622	402	327	368	327	421	304	463	441
ENSMUSG00000000776	ENSMUST00000000793;ENSMUST00000180358;ENSMUST00000226523;ENSMUST00000226549;ENSMUST00000227748;ENSMUST00000227985	67065	Polr3d	polymerase (RNA) III (DNA directed) polypeptide D [Source:MGI Symbol;Acc:MGI:1914315]	14	70676197	70680887	4691	-	152	144	159	120	101	73	222	212	120	74	165	258	152	184	74	146	81
ENSMUSG00000000782	ENSMUST00000086844;ENSMUST00000109071;ENSMUST00000238914	21414	Tcf7	transcription factor 7, T cell specific [Source:MGI Symbol;Acc:MGI:98507]	11	52143198	52174158	30961	-	67	57	42	45	49	37	38	58	27	19	57	70	49	53	19	57	26
ENSMUSG00000000787	ENSMUST00000000804;ENSMUST00000123096;ENSMUST00000149639;ENSMUST00000153611;ENSMUST00000153851	13205	Ddx3x	DEAD box helicase 3, X-linked [Source:MGI Symbol;Acc:MGI:103064]	X	13147209	13160291	13083	+	4527	4360	4495	3982	3742.92	3227	4510	5642	3978	2998	3729.97	4839	4116	4680	2097	6911	2299
ENSMUSG00000000791	ENSMUST00000000808;ENSMUST00000211936;ENSMUST00000212146;ENSMUST00000212251;ENSMUST00000212657;ENSMUST00000212826	16161	Il12rb1	interleukin 12 receptor, beta 1 [Source:MGI Symbol;Acc:MGI:104579]	8	71261093	71274068	12976	+	16	28	12	13	15	10	17	19	12	7	18	16	4	8	7	25	16
ENSMUSG00000000804	ENSMUST00000000821;ENSMUST00000108075;ENSMUST00000172515;ENSMUST00000172595;ENSMUST00000172950;ENSMUST00000173156;ENSMUST00000173271;ENSMUST00000174602;ENSMUST00000174809	237898	Usp32	ubiquitin specific peptidase 32 [Source:MGI Symbol;Acc:MGI:2144475]	11	84875268	85030987	155720	-	916	878	841	841	740	676	815	1182	980	678	770	761	792	937	546	1040	575
ENSMUSG00000000811	ENSMUST00000000828;ENSMUST00000101171	232223	Txnrd3	thioredoxin reductase 3 [Source:MGI Symbol;Acc:MGI:2386711]	6	89620970	89652511	31542	+	176	224	176	174	149	109	135	226	144	74	140	147	139	193	69	203	109
ENSMUSG00000000823	ENSMUST00000108789;ENSMUST00000128553;ENSMUST00000131866;ENSMUST00000132538;ENSMUST00000133598;ENSMUST00000135561;ENSMUST00000140103;ENSMUST00000150552;ENSMUST00000153998;ENSMUST00000155947	269401	Zfp512b	zinc finger protein 512B [Source:MGI Symbol;Acc:MGI:2685478]	2	181223896	181234596	10701	-	722	583	763	606	597	280	936	1015	402	250	754	596	533	788	246	594	386
ENSMUSG00000000826	ENSMUST00000072334;ENSMUST00000108796;ENSMUST00000108797;ENSMUST00000116365;ENSMUST00000141523;ENSMUST00000152578	13002	Dnajc5	DnaJ heat shock protein family (Hsp40) member C5 [Source:MGI Symbol;Acc:MGI:892995]	2	181162278	181196926	34649	+	1641	1624	1668	1266	1244	618	2056	2417	1120	664	1594	2115	1542	1808	607	1926	868
ENSMUSG00000000827	ENSMUST00000000844;ENSMUST00000069712;ENSMUST00000108799;ENSMUST00000108800;ENSMUST00000129390;ENSMUST00000130261;ENSMUST00000141825;ENSMUST00000149163;ENSMUST00000155589;ENSMUST00000183956;ENSMUST00000184588;ENSMUST00000184849	66314	Tpd52l2	tumor protein D52-like 2 [Source:MGI Symbol;Acc:MGI:1913564]	2	181138935	181159759	20825	+	553	726	607	874	845	1205	812	893	1971	1493	781	614	512	721	605	694	631
ENSMUSG00000000838	ENSMUST00000088546;ENSMUST00000114653;ENSMUST00000114654;ENSMUST00000114655;ENSMUST00000114656;ENSMUST00000114657;ENSMUST00000127954;ENSMUST00000127993;ENSMUST00000133327;ENSMUST00000141728;ENSMUST00000142584;ENSMUST00000146177;ENSMUST00000148348	14265	Fmr1	fragile X messenger ribonucleoprotein 1 [Source:MGI Symbol;Acc:MGI:95564]	X	67722147	67761569	39423	+	532	572	535	541	498	525	596	783	816	673	535	485	431	539	311	656	362
ENSMUSG00000000876	ENSMUST00000000896;ENSMUST00000109703	59038	Pxmp4	peroxisomal membrane protein 4 [Source:MGI Symbol;Acc:MGI:1891701]	2	154427678	154445628	17951	-	2066	1750	1631	1511	1669	1176	1680	1424	1460	1171	1686	2722	2306	3891	998	1081	885
ENSMUSG00000000881	ENSMUST00000000901;ENSMUST00000087984;ENSMUST00000113735;ENSMUST00000113736;ENSMUST00000146772;ENSMUST00000147863;ENSMUST00000148076;ENSMUST00000151020	53310	Dlg3	discs large MAGUK scaffold protein 3 [Source:MGI Symbol;Acc:MGI:1888986]	X	99811328	99862016	50689	+	528	592	479	531	483	359	573	789	634	345	417	415	480	601	269	459	333
ENSMUSG00000000884	ENSMUST00000000904;ENSMUST00000090086;ENSMUST00000115600;ENSMUST00000115601;ENSMUST00000124924;ENSMUST00000129952;ENSMUST00000139625;ENSMUST00000147739;ENSMUST00000149035;ENSMUST00000151253;ENSMUST00000167778;ENSMUST00000231621;ENSMUST00000232235	13972	Gnb1l	guanine nucleotide binding protein (G protein), beta polypeptide 1-like [Source:MGI Symbol;Acc:MGI:1338057]	16	18317463	18385429	67967	+	38	37	50	59	44	42	51	62	74	54	50	38	33	73	26	35	33
ENSMUSG00000000901	ENSMUST00000000924;ENSMUST00000120281;ENSMUST00000132869;ENSMUST00000133897;ENSMUST00000152222;ENSMUST00000219728	17385	Mmp11	matrix metallopeptidase 11 [Source:MGI Symbol;Acc:MGI:97008]	10	75759056	75772330	13275	-	6	10	10	11	10	10	14	16	9	8	18	15	16	19	4	5	3
ENSMUSG00000000902	ENSMUST00000000925;ENSMUST00000121304;ENSMUST00000133189;ENSMUST00000140388;ENSMUST00000140408;ENSMUST00000146555	20587	Smarcb1	SWI/SNF related, matrix associated, actin dependent regulator of chromatin, subfamily b, member 1 [Source:MGI Symbol;Acc:MGI:1328366]	10	75732603	75757451	24849	-	416	458	382	416	301	326	519	531	524	317	441	573	459	509	176	325	237
ENSMUSG00000000915	ENSMUST00000000939;ENSMUST00000166258;ENSMUST00000166684;ENSMUST00000167325;ENSMUST00000167879;ENSMUST00000171407;ENSMUST00000198664	29816	Hip1r	huntingtin interacting protein 1 related [Source:MGI Symbol;Acc:MGI:1352504]	5	124111691	124143621	31931	+	616	407	1001	342	327	267	622	461	321	274	574	625	380	547	125	270	160
ENSMUSG00000000916	ENSMUST00000000940;ENSMUST00000124453;ENSMUST00000126454;ENSMUST00000127746;ENSMUST00000131863;ENSMUST00000141867;ENSMUST00000170342;ENSMUST00000202422;ENSMUST00000202792	100609	Nsun5	NOL1/NOP2/Sun domain family, member 5 [Source:MGI Symbol;Acc:MGI:2140844]	5	135398807	135405659	6853	+	227	237	246	240	185	150	226	245	246	152	176	295	217	288	137	186	175
ENSMUSG00000000934	ENSMUST00000000958;ENSMUST00000230469;ENSMUST00000230774	72960	Top1mt	DNA topoisomerase 1, mitochondrial [Source:MGI Symbol;Acc:MGI:1920210]	15	75528884	75550649	21766	-	444	505	409	379	381	224	517	525	306	149	442	594	493	639	191	422	245
ENSMUSG00000000948	ENSMUST00000179360;ENSMUST00000189432;ENSMUST00000191456;ENSMUST00000191491	NA	Gm38393	predicted gene, 38393 [Source:MGI Symbol;Acc:MGI:5613898]	7	59623897	59654812	30916	-	9	14	2.61	16.04	8.22	8	10	10	23	17	9.67	8.82	22	11.46	16.09	24	25.09
ENSMUSG00000000957	ENSMUST00000089688;ENSMUST00000196155;ENSMUST00000197874;ENSMUST00000197947;ENSMUST00000198679;ENSMUST00000225641;ENSMUST00000226710	17387	Mmp14	matrix metallopeptidase 14 (membrane-inserted) [Source:MGI Symbol;Acc:MGI:101900]	14	54669069	54682821	13753	+	394	415	524	416	347	236	1157	671	308	238	923	990	610	847	150	338	181
ENSMUSG00000000958	ENSMUST00000000984;ENSMUST00000195970;ENSMUST00000195999;ENSMUST00000196215;ENSMUST00000196966;ENSMUST00000197440;ENSMUST00000197667;ENSMUST00000200545;ENSMUST00000226753;ENSMUST00000227334;ENSMUST00000227967;ENSMUST00000228488	20540	Slc7a7	solute carrier family 7 (cationic amino acid transporter, y+ system), member 7 [Source:MGI Symbol;Acc:MGI:1337120]	14	54606899	54655237	48339	-	64	37	32	49	67	64	145	143	144	95	123	100	24	59	22	32	31
ENSMUSG00000000959	ENSMUST00000000985;ENSMUST00000196882;ENSMUST00000198107;ENSMUST00000228567;ENSMUST00000228719	69089	Oxa1l	oxidase assembly 1-like [Source:MGI Symbol;Acc:MGI:1916339]	14	54598291	54607130	8840	+	1196	1138	1149	1003	841	511	1279	1423	769	444	1276	1203	1064	1443	439	1067	560
ENSMUSG00000000976	ENSMUST00000001002;ENSMUST00000125602;ENSMUST00000125831;ENSMUST00000127428;ENSMUST00000136572	217026	Heatr6	HEAT repeat containing 6 [Source:MGI Symbol;Acc:MGI:1919790]	11	83644522	83674580	30059	+	308	293	354	242	198	112	328	447	203	128	320	381	320	412	142	454	217
ENSMUSG00000000982	ENSMUST00000001008	20302	Ccl3	C-C motif chemokine ligand 3 [Source:MGI Symbol;Acc:MGI:98260]	11	83538670	83540181	1512	-	2	0	5	3	8	6	19	3	8	5	8	1	0	2	2	1	2
ENSMUSG00000001014	ENSMUST00000001040;ENSMUST00000215077	78369	Icam4	intercellular adhesion molecule 4, Landsteiner-Wiener blood group [Source:MGI Symbol;Acc:MGI:1925619]	9	20940669	20941891	1223	+	11	9	8	5	2	1	3	5	6	5	3	8	6	3	3	2	4
ENSMUSG00000001016	ENSMUST00000001042;ENSMUST00000196769;ENSMUST00000197644;ENSMUST00000198325;ENSMUST00000198641;ENSMUST00000198738	67781	Ilf2	interleukin enhancer binding factor 2 [Source:MGI Symbol;Acc:MGI:1915031]	3	90383433	90395686	12254	+	343	339	350	486	404	444	475	525	755	487	344	366	300	387	306	304	289
ENSMUSG00000001017	ENSMUST00000001043;ENSMUST00000049937;ENSMUST00000076639;ENSMUST00000107342;ENSMUST00000107343;ENSMUST00000107344;ENSMUST00000107346;ENSMUST00000131868;ENSMUST00000146740;ENSMUST00000249613	66511	Chtop	chromatin target of PRMT1 [Source:MGI Symbol;Acc:MGI:1913761]	3	90406263	90416805	10543	-	1242	1483	1259	1781	1393	1652	1403	1634	2443	1690	1218	1403	1193	1559	1079	1282	1030
ENSMUSG00000001018	ENSMUST00000107351;ENSMUST00000107352;ENSMUST00000149884;ENSMUST00000184877;ENSMUST00000185005	20615	Snapin	SNAP-associated protein [Source:MGI Symbol;Acc:MGI:1333745]	3	90395333	90398340	3008	-	341	387	328	488	383	374	398	518	679	437	371	326	311	398	281	454	347
ENSMUSG00000001020	ENSMUST00000001046;ENSMUST00000142476	20198	S100a4	S100 calcium binding protein A4 [Source:MGI Symbol;Acc:MGI:1330282]	3	90511078	90513352	2275	+	9	5	4	10	16	40	52	42	151	55	25	18	6	3	7	0	2
ENSMUSG00000001025	ENSMUST00000001051;ENSMUST00000197189;ENSMUST00000198128;ENSMUST00000200289	20200	S100a6	S100 calcium binding protein A6 (calcyclin) [Source:MGI Symbol;Acc:MGI:1339467]	3	90520189	90531488	11300	+	15	12	14	102	127	236	311	104	414	307	241	21	15	19	22	11	18
ENSMUSG00000001029	ENSMUST00000001055;ENSMUST00000106809;ENSMUST00000106813;ENSMUST00000141146;ENSMUST00000173795	15896	Icam2	intercellular adhesion molecule 2 [Source:MGI Symbol;Acc:MGI:96394]	11	106268482	106278901	10420	-	32	34	46	67	73	93	99	87	177	122	77	65	65	47	30	40	28
ENSMUSG00000001034	ENSMUST00000079080;ENSMUST00000101085;ENSMUST00000108714;ENSMUST00000123360;ENSMUST00000125840;ENSMUST00000126495;ENSMUST00000128478;ENSMUST00000129272;ENSMUST00000135521;ENSMUST00000139663;ENSMUST00000139932;ENSMUST00000140779;ENSMUST00000152755;ENSMUST00000153441	23939	Mapk7	mitogen-activated protein kinase 7 [Source:MGI Symbol;Acc:MGI:1346347]	11	61379638	61385232	5595	-	34	23	56	43	28	13	118	99	22	13	92	36	30	36	9	25	21
ENSMUSG00000001036	ENSMUST00000001063;ENSMUST00000108711;ENSMUST00000108712;ENSMUST00000108713;ENSMUST00000137525;ENSMUST00000141335;ENSMUST00000146455;ENSMUST00000147501;ENSMUST00000148956;ENSMUST00000151545;ENSMUST00000153984;ENSMUST00000178202;ENSMUST00000179936	13855	Epn2	epsin 2 [Source:MGI Symbol;Acc:MGI:1333766]	11	61408075	61470513	62439	-	150	180	163	202	227	177	206	323	299	148	170	194	175	201	101	166	147
ENSMUSG00000001039	ENSMUST00000102657;ENSMUST00000127889;ENSMUST00000138057;ENSMUST00000140548;ENSMUST00000146562;ENSMUST00000155176	27078	B9d1	B9 protein domain 1 [Source:MGI Symbol;Acc:MGI:1351471]	11	61395970	61403757	7788	+	3	7	4	14	17	17	18	11	37	36	18	6	4	11	6	2	8
ENSMUSG00000001052	ENSMUST00000001079;ENSMUST00000164758;ENSMUST00000165873;ENSMUST00000165889;ENSMUST00000168644;ENSMUST00000168675;ENSMUST00000168908;ENSMUST00000170163;ENSMUST00000172324	99683	Sec24b	SEC24 homolog B, COPII coat complex component [Source:MGI Symbol;Acc:MGI:2139764]	3	129776408	129855202	78795	-	516	491	552	430	411	355	730	751	588	363	630	575	444	583	185	609	228
ENSMUSG00000001053	ENSMUST00000001080;ENSMUST00000142721;ENSMUST00000156835	212706	N4bp3	NEDD4 binding protein 3 [Source:MGI Symbol;Acc:MGI:2442218]	11	51533890	51541669	7780	-	67	65	139	103	74	57	127	101	77	56	65	151	100	137	48	54	46
ENSMUSG00000001054	ENSMUST00000001081;ENSMUST00000132854;ENSMUST00000136020;ENSMUST00000147009	66089	Rmnd5b	required for meiotic nuclear division 5 homolog B [Source:MGI Symbol;Acc:MGI:1913339]	11	51514498	51526723	12226	-	219	260	261	289	249	136	351	304	256	133	304	404	273	341	116	239	157
ENSMUSG00000001056	ENSMUST00000001083;ENSMUST00000127405	52530	Nhp2	NHP2 ribonucleoprotein [Source:MGI Symbol;Acc:MGI:1098547]	11	51510562	51514541	3980	+	426	476	389	535	525	528	488	578	971	705	560	529	353	573	299	315	334
ENSMUSG00000001062	ENSMUST00000117643;ENSMUST00000118279;ENSMUST00000122363;ENSMUST00000124508;ENSMUST00000127978;ENSMUST00000129591;ENSMUST00000130275;ENSMUST00000130965;ENSMUST00000137569;ENSMUST00000146136;ENSMUST00000149490;ENSMUST00000155853;ENSMUST00000155869	72325	Vps9d1	VPS9 domain containing 1 [Source:MGI Symbol;Acc:MGI:1914143]	8	123969095	123981087	11993	-	334	402	534	306	225	150	356	506	198	103	399	333	329	436	148	443	209
ENSMUSG00000001065	ENSMUST00000001092;ENSMUST00000130333;ENSMUST00000146158;ENSMUST00000147312;ENSMUST00000150356;ENSMUST00000154450;ENSMUST00000156896;ENSMUST00000211828	57247	Zfp276	zinc finger protein (C2H2 type) 276 [Source:MGI Symbol;Acc:MGI:1888495]	8	123980934	123996484	15551	+	547	539	834	394	263	269	379	464	265	215	684	354	319	518	243	726	425
ENSMUSG00000001076	ENSMUST00000064462	239659	C1ql4	complement component 1, q subcomponent-like 4 [Source:MGI Symbol;Acc:MGI:3579909]	15	98981967	98985698	3732	-	4	7	3	5	2	5	2	10	7	1	1	18	2	7	2	3	1
ENSMUSG00000001082	ENSMUST00000001109;ENSMUST00000114329;ENSMUST00000114331;ENSMUST00000124668;ENSMUST00000126257;ENSMUST00000128670;ENSMUST00000130347;ENSMUST00000134156;ENSMUST00000136010;ENSMUST00000137150;ENSMUST00000137506;ENSMUST00000137744;ENSMUST00000138212;ENSMUST00000148270;ENSMUST00000149657;ENSMUST00000151247;ENSMUST00000155577;ENSMUST00000200717;ENSMUST00000201147;ENSMUST00000202065;ENSMUST00000202378	68294	Mfsd10	major facilitator superfamily domain containing 10 [Source:MGI Symbol;Acc:MGI:1915544]	5	34790986	34794556	3571	-	81	56	67	48	52	24	150	157	63	23	124	59	53	90	13	44	32
ENSMUSG00000001089	ENSMUST00000001116;ENSMUST00000063021;ENSMUST00000105849;ENSMUST00000129230;ENSMUST00000142248;ENSMUST00000168936;ENSMUST00000170102	269593	Luzp1	leucine zipper protein 1 [Source:MGI Symbol;Acc:MGI:107629]	4	136197072	136282091	85020	+	365	315	366	294	248	149	591	707	233	177	446	468	370	472	116	515	169
ENSMUSG00000001095	ENSMUST00000001122	20500	Slc13a2	solute carrier family 13 (sodium-dependent dicarboxylate transporter), member 2 [Source:MGI Symbol;Acc:MGI:1276558]	11	78287913	78313043	25131	-	161	183	185	138	77	46	83	174	75	37	55	84	206	177	18	95	46
ENSMUSG00000001098	ENSMUST00000001125;ENSMUST00000102581;ENSMUST00000123538;ENSMUST00000132646;ENSMUST00000134173;ENSMUST00000134532;ENSMUST00000135170	330171	Kctd10	potassium channel tetramerisation domain containing 10 [Source:MGI Symbol;Acc:MGI:2141207]	5	114501628	114518569	16942	-	247	263	307	257	245	137	524	458	200	168	376	397	295	326	94	318	134
ENSMUSG00000001100	ENSMUST00000001127;ENSMUST00000133601;ENSMUST00000136284;ENSMUST00000147930;ENSMUST00000151499;ENSMUST00000156754	67811	Poldip2	polymerase (DNA-directed), delta interacting protein 2 [Source:MGI Symbol;Acc:MGI:1915061]	11	78403019	78413562	10544	+	2293	2555	2192	3038	2496	2656	2238	2573	4179	2794	2183	2213	1920	2451	1708	1975	1809
ENSMUSG00000001103	ENSMUST00000001130;ENSMUST00000125670	18292	Sebox	SEBOX homeobox [Source:MGI Symbol;Acc:MGI:108012]	11	78394273	78395907	1635	+	17	22	16	11	9	24	19	13	13	21	7	9	10	16	3	9	6
ENSMUSG00000001105	ENSMUST00000050366;ENSMUST00000108275;ENSMUST00000128788;ENSMUST00000137120;ENSMUST00000152016	55978	Ift20	intraflagellar transport 20 [Source:MGI Symbol;Acc:MGI:1915585]	11	78427187	78432563	5377	+	727	874	746	1026	909	1499	660	741	2285	1637	636	798	637	783	666	731	808
ENSMUSG00000001119	ENSMUST00000001147;ENSMUST00000137599	12833	Col6a1	collagen, type VI, alpha 1 [Source:MGI Symbol;Acc:MGI:88459]	10	76544626	76562002	17377	-	154	139	218	267	221	148	297	438	194	156	501	169	144	184	78	182	70
ENSMUSG00000001120	ENSMUST00000001148;ENSMUST00000092393;ENSMUST00000105411;ENSMUST00000165571;ENSMUST00000168240;ENSMUST00000168465;ENSMUST00000168505;ENSMUST00000171437;ENSMUST00000173854	59093	Pcbp3	poly(rC) binding protein 3 [Source:MGI Symbol;Acc:MGI:1890470]	10	76597691	76797721	200031	-	16	18	8	17	10	15	24	20	18	17	28	12	10	16	8	20	4
ENSMUSG00000001123	ENSMUST00000073001;ENSMUST00000108268;ENSMUST00000108269;ENSMUST00000140073	16859	Lgals9	lectin, galactose binding, soluble 9 [Source:MGI Symbol;Acc:MGI:109496]	11	78853800	78875772	21973	-	10713	11405	10318	10583	8877	6509	9817	12097	9836	5064	8982	12178	10522	13752	5200	12138	5886
ENSMUSG00000001127	ENSMUST00000001155;ENSMUST00000120356;ENSMUST00000122312;ENSMUST00000122850;ENSMUST00000123219;ENSMUST00000128250;ENSMUST00000136451;ENSMUST00000148032;ENSMUST00000150190;ENSMUST00000152955	11836	Araf	Araf proto-oncogene, serine/threonine kinase [Source:MGI Symbol;Acc:MGI:88065]	X	20664053	20726758	62706	+	1295	1428	1327	1401	1213	962	1452	1653	1370	900	1243	1694	1364	1894	786	1376	1046
ENSMUSG00000001128	ENSMUST00000001156;ENSMUST00000122862	18636	Cfp	complement factor properdin [Source:MGI Symbol;Acc:MGI:97545]	X	20791693	20797794	6102	-	290	265	300	421	409	441	1023	1372	1170	481	526	242	127	252	116	118	137
ENSMUSG00000001131	ENSMUST00000009530;ENSMUST00000115342	21857	Timp1	tissue inhibitor of metalloproteinase 1 [Source:MGI Symbol;Acc:MGI:98752]	X	20736405	20740974	4570	+	3	0	1	4	19	21	61	8	17	13	39	1	0	1	2	1	0
ENSMUSG00000001134	ENSMUST00000001162;ENSMUST00000123836;ENSMUST00000129899;ENSMUST00000142341;ENSMUST00000147205;ENSMUST00000150719	22294	Uxt	ubiquitously expressed prefoldin like chaperone [Source:MGI Symbol;Acc:MGI:1277988]	X	20807961	20828256	20296	-	280	330	293	380	306	585	308	309.98	936.97	641	270	296	226	285	240.94	266	312
ENSMUSG00000001138	ENSMUST00000001166;ENSMUST00000097776;ENSMUST00000135100;ENSMUST00000154225;ENSMUST00000195264	94218	Cnnm3	cyclin M3 [Source:MGI Symbol;Acc:MGI:2151055]	1	36550948	36567318	16371	+	383	360	374	213	198	89	355	421	138	78	298	381	363	623	100	266	142
ENSMUSG00000001143	ENSMUST00000001171;ENSMUST00000115011;ENSMUST00000123583;ENSMUST00000125304;ENSMUST00000134594;ENSMUST00000152088;ENSMUST00000192969;ENSMUST00000193502	214895	Lman2l	lectin, mannose-binding 2-like [Source:MGI Symbol;Acc:MGI:2443010]	1	36458952	36484352	25401	-	419	307	464	249	241	159	388	388	205	109	265	457	366	488	105	277	139
ENSMUSG00000001150	ENSMUST00000170795;ENSMUST00000218361;ENSMUST00000218881;ENSMUST00000218904;ENSMUST00000219811;ENSMUST00000220410	54387	Mcm3ap	minichromosome maintenance complex component 3 associated protein [Source:MGI Symbol;Acc:MGI:1930089]	10	76304761	76351691	46931	+	486	450	493	450	364	233	456	601	413	280	458	675	489	639	229	493	269
ENSMUSG00000001151	ENSMUST00000001179;ENSMUST00000217838;ENSMUST00000218747;ENSMUST00000219011;ENSMUST00000219243;ENSMUST00000219403;ENSMUST00000219701;ENSMUST00000220395	18541	Pcnt	pericentrin (kendrin) [Source:MGI Symbol;Acc:MGI:102722]	10	76187097	76278620	91524	-	254	214	233	113	152	66	261	424	103	66	293	216	216	302	52	281	78
ENSMUSG00000001155	ENSMUST00000001183;ENSMUST00000137347;ENSMUST00000146344	14317	Ftcd	formiminotransferase cyclodeaminase [Source:MGI Symbol;Acc:MGI:1339962]	10	76411482	76426172	14691	+	10881	12126	12095	12423	9864	8330	10724	11072	11327	7859	10121	12988	11685	16889	8108	10966	8952
ENSMUSG00000001156	ENSMUST00000001184;ENSMUST00000203946;ENSMUST00000204437;ENSMUST00000205076	17119	Mxd1	MAX dimerization protein 1 [Source:MGI Symbol;Acc:MGI:96908]	6	86624024	86646143	22120	-	148	157	167	99	136	80	183	206	122	75	200	104	109	141	46	78	77
ENSMUSG00000001157	ENSMUST00000001185;ENSMUST00000113679;ENSMUST00000135880;ENSMUST00000203741	23885	Gmcl1	germ cell-less, spermatogenesis associated 1 [Source:MGI Symbol;Acc:MGI:1345156]	6	86668750	86710365	41616	-	243	285	278	401	313	348	307	318	601	396	320	303	282	315	202	296	240
ENSMUSG00000001158	ENSMUST00000001186;ENSMUST00000113683;ENSMUST00000131674;ENSMUST00000133404	66618	Snrnp27	small nuclear ribonucleoprotein 27 (U4/U6.U5) [Source:MGI Symbol;Acc:MGI:1913868]	6	86652133	86661504	9372	-	186	271	222	377	274	412	235	261	648	451	206	205	180	208	202	244	219
ENSMUSG00000001166	ENSMUST00000117193;ENSMUST00000125547;ENSMUST00000130045	114643	Oas1c	2'-5' oligoadenylate synthetase 1C [Source:MGI Symbol;Acc:MGI:2149633]	5	120938259	120950579	12321	-	29	27	20	52	34	29	76	118	156	55	78	23	30	30	13	36	9
ENSMUSG00000001173	ENSMUST00000001202;ENSMUST00000115013;ENSMUST00000115020;ENSMUST00000142719;ENSMUST00000144664;ENSMUST00000146486;ENSMUST00000154732	320634	Ocrl	OCRL, inositol polyphosphate-5-phosphatase [Source:MGI Symbol;Acc:MGI:109589]	X	47001264	47054745	53482	+	126	168	172	125	87	56	204	228	80	39	183	149	134	165	60	209	100
ENSMUSG00000001175	ENSMUST00000001204;ENSMUST00000110082;ENSMUST00000127300;ENSMUST00000153524	12313	Calm1	calmodulin 1 [Source:MGI Symbol;Acc:MGI:88251]	12	100165694	100176073	10380	+	3841	4331	3651	4942	4029	5427	4798	5607	9718	5311	3457	4425	4290	4871	2875	4939	3760
ENSMUSG00000001211	ENSMUST00000001240;ENSMUST00000105387;ENSMUST00000105388;ENSMUST00000105389;ENSMUST00000105390;ENSMUST00000138035;ENSMUST00000139282;ENSMUST00000146296;ENSMUST00000146899;ENSMUST00000150828;ENSMUST00000166360;ENSMUST00000219907;ENSMUST00000219932	28169	Agpat3	1-acylglycerol-3-phosphate O-acyltransferase 3 [Source:MGI Symbol;Acc:MGI:1336186]	10	78105012	78188323	83312	-	4741	4449	4199	3212	3331	1593	4479	4560	2192	1372	4222	5030	4400	6218	1877	3125	2287
ENSMUSG00000001227	ENSMUST00000001256;ENSMUST00000167545	20359	Sema6b	sema domain, transmembrane domain (TM), and cytoplasmic domain, (semaphorin) 6B [Source:MGI Symbol;Acc:MGI:1202889]	17	56430085	56447343	17259	-	48	56	74	46	57	22	197	113	51	28	117	78	56	77	40	37	21
ENSMUSG00000001228	ENSMUST00000001258;ENSMUST00000113035;ENSMUST00000113038;ENSMUST00000113039;ENSMUST00000137876;ENSMUST00000139654;ENSMUST00000142387	18140	Uhrf1	ubiquitin-like, containing PHD and RING finger domains, 1 [Source:MGI Symbol;Acc:MGI:1338889]	17	56610321	56630486	20166	+	8	6	12	34	33	31	228	446	174	72	249	8	3	4	3	11	2
ENSMUSG00000001229	ENSMUST00000038794;ENSMUST00000223616;ENSMUST00000233586	224897	Dpp9	dipeptidylpeptidase 9 [Source:MGI Symbol;Acc:MGI:2443967]	17	56493807	56525905	32099	-	1343	1082	1335	673	532	262	1023	1097	327	218	762	1602	1192	1477	273	758	447
ENSMUSG00000001240	ENSMUST00000107282;ENSMUST00000122006;ENSMUST00000128260;ENSMUST00000129680;ENSMUST00000138229;ENSMUST00000149006;ENSMUST00000149585;ENSMUST00000151830	54409	Ramp2	receptor (calcitonin) activity modifying protein 2 [Source:MGI Symbol;Acc:MGI:1859650]	11	101136854	101150372	13519	+	119	144.38	136.1	171.71	142.34	155	169	172	197.28	162	203	138	109	121	56.91	100	51
ENSMUSG00000001247	ENSMUST00000001279;ENSMUST00000098553;ENSMUST00000108116;ENSMUST00000147431;ENSMUST00000205961	54135	Lsr	lipolysis stimulated lipoprotein receptor [Source:MGI Symbol;Acc:MGI:1927471]	7	30657195	30672889	15695	-	3939	3599	3669	3157	2438	2218	4629	4542	3007	2096	4539	5138	3351	4324	1563	2631	1957
ENSMUSG00000001248	ENSMUST00000001280;ENSMUST00000085636;ENSMUST00000185514;ENSMUST00000185589;ENSMUST00000185985;ENSMUST00000186634;ENSMUST00000186723;ENSMUST00000187679;ENSMUST00000188032;ENSMUST00000202814;ENSMUST00000205298;ENSMUST00000206233;ENSMUST00000206432;ENSMUST00000220635	52857	Gramd1a	GRAM domain containing 1A [Source:MGI Symbol;Acc:MGI:105490]	7	30829552	30855321	25770	-	300	285	341	282	284	198	436	455	333	219	391	303	246	333	159	272	237
ENSMUSG00000001249	ENSMUST00000039435;ENSMUST00000108102;ENSMUST00000164340;ENSMUST00000164929;ENSMUST00000165124;ENSMUST00000165480;ENSMUST00000167719;ENSMUST00000168623;ENSMUST00000168884;ENSMUST00000171225;ENSMUST00000171259	15451	Hpn	hepsin [Source:MGI Symbol;Acc:MGI:1196620]	7	30798150	30814715	16566	-	9726	9742	9783	7842	7507	4663	9973	9700	6154	4333	9901	9461	7676	11077	4136	7678	4799
ENSMUSG00000001270	ENSMUST00000001304;ENSMUST00000220888;ENSMUST00000222513;ENSMUST00000222705;ENSMUST00000223099	12709	Ckb	creatine kinase, brain [Source:MGI Symbol;Acc:MGI:88407]	12	111635795	111638772	2978	-	70	85	96	213	216	285	455.99	410	594	313	279	125	61	147	35	45	35
ENSMUSG00000001280	ENSMUST00000001326;ENSMUST00000163709;ENSMUST00000165837;ENSMUST00000168802;ENSMUST00000169619;ENSMUST00000170884	20683	Sp1	trans-acting transcription factor 1 [Source:MGI Symbol;Acc:MGI:98372]	15	102314578	102344839	30262	+	851	797	800	725	657	389	1022	1134	542	351	809	1153	880	1159	415	982	569
ENSMUSG00000001281	ENSMUST00000001327;ENSMUST00000127014;ENSMUST00000229440;ENSMUST00000230550;ENSMUST00000230652	16421	Itgb7	integrin beta 7 [Source:MGI Symbol;Acc:MGI:96616]	15	102124430	102140379	15950	-	12	17	19	17	21	15	92	45	43	17	55	32	14	19	9	8	8
ENSMUSG00000001285	ENSMUST00000001331;ENSMUST00000113682;ENSMUST00000164019;ENSMUST00000164961;ENSMUST00000168547;ENSMUST00000170078;ENSMUST00000170281;ENSMUST00000170713;ENSMUST00000171244;ENSMUST00000171733	60315	Myg1	melanocyte proliferating gene 1 [Source:MGI Symbol;Acc:MGI:1929864]	15	102240144	102246574	6431	+	380	430	378	449	394	388	434	484	655.15	462	417.23	409	314.29	445.27	265.24	383	310
ENSMUSG00000001288	ENSMUST00000043172;ENSMUST00000063339;ENSMUST00000124224;ENSMUST00000130204;ENSMUST00000135466;ENSMUST00000155563;ENSMUST00000230330	19411	Rarg	retinoic acid receptor, gamma [Source:MGI Symbol;Acc:MGI:97858]	15	102143373	102165952	22580	-	102	82	56	78	81	45	209	196	72	41	132	158	102	131	26	53	43
ENSMUSG00000001289	ENSMUST00000001335;ENSMUST00000062492;ENSMUST00000165671;ENSMUST00000165717;ENSMUST00000166658;ENSMUST00000168805;ENSMUST00000169637;ENSMUST00000170627	56612	Pfdn5	prefoldin 5 [Source:MGI Symbol;Acc:MGI:1928753]	15	102234551	102240308	5758	+	1017	1424	1182	2001	1735	3526	1378	1437	5904.85	4280	1269.77	1135	914.71	1294.73	1162.76	894	1284
ENSMUSG00000001300	ENSMUST00000001319;ENSMUST00000152698;ENSMUST00000209169	13642	Efnb2	ephrin B2 [Source:MGI Symbol;Acc:MGI:105097]	8	8667434	8711242	43809	-	39	65	93	39	47	33	117	89	32	59	112	43	37	60	15	44	20
ENSMUSG00000001305	ENSMUST00000001339;ENSMUST00000162336	67223	Rrp15	ribosomal RNA processing 15 homolog [Source:MGI Symbol;Acc:MGI:1914473]	1	186453175	186481555	28381	-	189	191	200	207	174	203	265	288	336	237	210	322	210	263	139	254	133
ENSMUSG00000001313	ENSMUST00000001347;ENSMUST00000134980;ENSMUST00000153185	11858	Rnd2	Rho family GTPase 2 [Source:MGI Symbol;Acc:MGI:1338755]	11	101355825	101362679	6855	+	214	241	236	297	254	308	357	367	672	424	256	511	494	679	264	416	334
ENSMUSG00000001323	ENSMUST00000065211;ENSMUST00000108447;ENSMUST00000108448;ENSMUST00000121738;ENSMUST00000123855;ENSMUST00000127499;ENSMUST00000128556;ENSMUST00000135587;ENSMUST00000138612;ENSMUST00000147817	27364	Srr	serine racemase [Source:MGI Symbol;Acc:MGI:1351636]	11	74797185	74816774	19590	-	2715	3042	2915	2248	2175	1143	2695	2979	1688	1037	2253	2715	2895	4160	1152	3171	1499
ENSMUSG00000001334	ENSMUST00000102600;ENSMUST00000249630	384061	Fndc5	fibronectin type III domain containing 5 [Source:MGI Symbol;Acc:MGI:1917614]	4	129030477	129038386	7910	+	11	3	7	8	10	6	16	10	9	5	8	10	10	9	3	9	1
ENSMUSG00000001348	ENSMUST00000069330;ENSMUST00000115315;ENSMUST00000165735;ENSMUST00000213815;ENSMUST00000216684;ENSMUST00000217643	11433	Acp5	acid phosphatase 5, tartrate resistant [Source:MGI Symbol;Acc:MGI:87883]	9	22038023	22047007	8985	-	2768	2821	2940	2672	2662	2121	2981	2653	3681	2003	2505	2621	1981	3142	1239	1868	1422
ENSMUSG00000001349	ENSMUST00000001384;ENSMUST00000213607;ENSMUST00000214601;ENSMUST00000216141;ENSMUST00000216872	12797	Cnn1	calponin 1 [Source:MGI Symbol;Acc:MGI:104979]	9	22010512	22020926	10415	+	2	3	1	5	15	5	24	5	6	3	10	0	5	2	0	3	0
ENSMUSG00000001366	ENSMUST00000001402;ENSMUST00000085311;ENSMUST00000159099;ENSMUST00000159453;ENSMUST00000162310;ENSMUST00000162451;ENSMUST00000162625	71538	Fbxo9	f-box protein 9 [Source:MGI Symbol;Acc:MGI:1918788]	9	77988781	78016347	27567	-	1397	1534	1316	1800	1688	2018	1384	1532	2962	2421	1269	1403	1219	1687	1411	1686	1346
ENSMUSG00000001376	ENSMUST00000001412;ENSMUST00000164052;ENSMUST00000170873;ENSMUST00000183532;ENSMUST00000183935;ENSMUST00000184411;ENSMUST00000184461;ENSMUST00000184780;ENSMUST00000184959	73288	Vps50	VPS50 EARP/GARPII complex subunit [Source:MGI Symbol;Acc:MGI:1920538]	6	3498382	3603531	105150	+	216	264	222	286	263	241	252	325	419	228	207	269	207	262	190	320	233
ENSMUSG00000001380	ENSMUST00000001416;ENSMUST00000235494;ENSMUST00000235863;ENSMUST00000236395	15115	Hars1	histidyl-tRNA synthetase 1 [Source:MGI Symbol;Acc:MGI:108087]	18	36899581	36916258	16678	-	757	806	721	686	539	482	873	956	717	404	728	999	728	901	362	712	426
ENSMUSG00000001383	ENSMUST00000001419;ENSMUST00000235399	66492	Zmat2	zinc finger, matrin type 2 [Source:MGI Symbol;Acc:MGI:1913742]	18	36926929	36932719	5791	+	754	811	719	748	606	559	861	889	860	486	671	725	651	810	339	634	332
ENSMUSG00000001403	ENSMUST00000001439;ENSMUST00000088248	68612	Ube2c	ubiquitin-conjugating enzyme E2C [Source:MGI Symbol;Acc:MGI:1915862]	2	164611818	164620742	8925	+	10	11	21	33	58	38	217	548	349	143	265	4	1	4	5	9	3
ENSMUSG00000001415	ENSMUST00000001451;ENSMUST00000192009;ENSMUST00000192057;ENSMUST00000192377;ENSMUST00000193007;ENSMUST00000193097;ENSMUST00000193224;ENSMUST00000194359;ENSMUST00000194942	229512	Smg5	SMG5 nonsense mediated mRNA decay factor [Source:MGI Symbol;Acc:MGI:2447364]	3	88243567	88269645	26079	+	837	663	729	615	569	338	879	969	477	287	702	1038	786	999	343	780	424
ENSMUSG00000001416	ENSMUST00000001452;ENSMUST00000163735;ENSMUST00000164122;ENSMUST00000164166;ENSMUST00000164783;ENSMUST00000167000;ENSMUST00000167718;ENSMUST00000168062;ENSMUST00000168971;ENSMUST00000193666	12462	Cct3	chaperonin containing TCP1 subunit 3 [Source:MGI Symbol;Acc:MGI:104708]	3	88204423	88229074	24652	+	2178	2422	1952	2913	2227	2565	2448	3109	4311	2479	2020	2927	2238	2913	1778	2140	1741
ENSMUSG00000001418	ENSMUST00000001454;ENSMUST00000131666;ENSMUST00000140039;ENSMUST00000152801;ENSMUST00000153716;ENSMUST00000154381;ENSMUST00000176425;ENSMUST00000176519;ENSMUST00000177005;ENSMUST00000193646	56700	Glmp	glycosylated lysosomal membrane protein [Source:MGI Symbol;Acc:MGI:1913318]	3	88232330	88238620	6291	+	1330	1332	1375	1050	1040	601	1691	1448	1150	663	1516	1342	1063	1515	501	889	659
ENSMUSG00000001419	ENSMUST00000001455;ENSMUST00000107558;ENSMUST00000107559;ENSMUST00000119251;ENSMUST00000139153;ENSMUST00000140927;ENSMUST00000152861	17261	Mef2d	myocyte enhancer factor 2D [Source:MGI Symbol;Acc:MGI:99533]	3	88049679	88079393	29715	+	897	836	905	374	390	208	782	912	276	182	938	818	681	1195	147	733	285
ENSMUSG00000001420	ENSMUST00000001456;ENSMUST00000107552;ENSMUST00000107553;ENSMUST00000193872	71913	Tmem79	transmembrane protein 79 [Source:MGI Symbol;Acc:MGI:1919163]	3	88235962	88243455	7494	-	56	27	53	37	25	14	33	32	23	16	26	61	29	50	14	23	17
ENSMUSG00000001424	ENSMUST00000001460;ENSMUST00000163772;ENSMUST00000164915;ENSMUST00000165151;ENSMUST00000166136;ENSMUST00000167201;ENSMUST00000168362;ENSMUST00000169321;ENSMUST00000169579;ENSMUST00000171195;ENSMUST00000171532;ENSMUST00000183161	56463	Snd1	staphylococcal nuclease and tudor domain containing 1 [Source:MGI Symbol;Acc:MGI:1929266]	6	28475138	28935161	460024	+	3347	3490	2817	2690	2131	1474	3244	4136	1802	1157	2682	3182	2977	3863	1277	2863	1647
ENSMUSG00000001435	ENSMUST00000072755;ENSMUST00000081654;ENSMUST00000105409;ENSMUST00000156009;ENSMUST00000218407	12822	Col18a1	collagen, type XVIII, alpha 1 [Source:MGI Symbol;Acc:MGI:88451]	10	76888012	77002382	114371	-	21407	20615	19963	15343	13352	6463	19663	23741	7594	4322	20767	22175	19420	26448	5374	11141	7444
ENSMUSG00000001436	ENSMUST00000105410;ENSMUST00000127249;ENSMUST00000130703;ENSMUST00000131031;ENSMUST00000132984;ENSMUST00000133059;ENSMUST00000136150;ENSMUST00000136925;ENSMUST00000144234	20509	Slc19a1	solute carrier family 19 (folate transporter), member 1 [Source:MGI Symbol;Acc:MGI:103182]	10	76868075	76896836	28762	+	155	133	113	107	115	65	151	184	131	124	215	117	75	117	124	198	126
ENSMUSG00000001440	ENSMUST00000001479;ENSMUST00000132633;ENSMUST00000153727	16211	Kpnb1	karyopherin subunit beta 1 [Source:MGI Symbol;Acc:MGI:107532]	11	97050540	97078707	28168	-	2341	2711	2578	2009	1753	947	3273	3966	1791	1073	2628	3378	3040	3414	751	2468	978
ENSMUSG00000001441	ENSMUST00000001480;ENSMUST00000107608;ENSMUST00000109294;ENSMUST00000133907;ENSMUST00000146833;ENSMUST00000147287;ENSMUST00000152546;ENSMUST00000152820;ENSMUST00000154372;ENSMUST00000154917;ENSMUST00000163164;ENSMUST00000163950;ENSMUST00000165216;ENSMUST00000165489;ENSMUST00000167806;ENSMUST00000168743;ENSMUST00000170506;ENSMUST00000171320;ENSMUST00000172108	19155	Npepps	aminopeptidase puromycin sensitive [Source:MGI Symbol;Acc:MGI:1101358]	11	97096668	97171464	74797	-	780	671	744	651	615	370	819	938	628	374	691	826	706	968	470	855	519
ENSMUSG00000001445	ENSMUST00000001485;ENSMUST00000054252	107732	Mrpl10	mitochondrial ribosomal protein L10 [Source:MGI Symbol;Acc:MGI:1333801]	11	96932386	96940039	7654	+	1071	1181	957	1148	973	916	1012	1192	1264	870	872	1041	940	1184	615	954	699
ENSMUSG00000001467	ENSMUST00000001507;ENSMUST00000129448;ENSMUST00000151539;ENSMUST00000199909	13121	Cyp51	cytochrome P450, family 51 [Source:MGI Symbol;Acc:MGI:106040]	5	4131145	4154746	23602	-	997	717	758	854	547	1141	553	1047	963	605	538	2322	1743	1714	758	1026	793
ENSMUSG00000001472	ENSMUST00000057934;ENSMUST00000108840;ENSMUST00000211932;ENSMUST00000211964;ENSMUST00000212470;ENSMUST00000212498;ENSMUST00000212569;ENSMUST00000212571;ENSMUST00000212741;ENSMUST00000212880;ENSMUST00000212996	66855	Tcf25	transcription factor 25 (basic helix-loop-helix) [Source:MGI Symbol;Acc:MGI:1914105]	8	124100492	124130574	30083	+	3557	3686	3710	3235	2937	2150	3833	4249	3209	2159	3344	3624	3013	4285	1901	3213	2280
ENSMUSG00000001473	ENSMUST00000001513;ENSMUST00000236667	67951	Tubb6	tubulin, beta 6 class V [Source:MGI Symbol;Acc:MGI:1915201]	18	67523787	67535819	12033	+	89	91	106	206	187	133	863	1366	680	336	656	384	212	291	70	193	91
ENSMUSG00000001482	ENSMUST00000001522;ENSMUST00000065534;ENSMUST00000093049;ENSMUST00000108830;ENSMUST00000108832;ENSMUST00000124741;ENSMUST00000128424;ENSMUST00000132063;ENSMUST00000212391;ENSMUST00000212827;ENSMUST00000212883	23854	Def8	differentially expressed in FDCP 8 [Source:MGI Symbol;Acc:MGI:1346331]	8	124150266	124190009	39744	+	960	1013	979	841	758	401	1050	964	525	319	989	1005	869	1243	324	604	482
ENSMUSG00000001506	ENSMUST00000001547;ENSMUST00000139974;ENSMUST00000148046;ENSMUST00000148593	12842	Col1a1	collagen, type I, alpha 1 [Source:MGI Symbol;Acc:MGI:88467]	11	94827050	94843868	16819	+	257	126	380	810	978	370	3362	1784	539	511	3962	245	180	267	59	236	50
ENSMUSG00000001507	ENSMUST00000001548;ENSMUST00000107739;ENSMUST00000120375;ENSMUST00000140342;ENSMUST00000141693;ENSMUST00000145671	16400	Itga3	integrin alpha 3 [Source:MGI Symbol;Acc:MGI:96602]	11	94935300	94967627	32328	-	123	116	145	104	100	56	389	409	148	58	241	166	179	199	33	128	71
ENSMUSG00000001517	ENSMUST00000073316;ENSMUST00000112148;ENSMUST00000123988;ENSMUST00000125456;ENSMUST00000136395;ENSMUST00000153423;ENSMUST00000203040;ENSMUST00000203258	14235	Foxm1	forkhead box M1 [Source:MGI Symbol;Acc:MGI:1347487]	6	128339930	128353109	13180	+	5	8	15	26	36	13	277	633	135	69	241	8	3	8	0	4	2
ENSMUSG00000001518	ENSMUST00000001559;ENSMUST00000133994;ENSMUST00000142615;ENSMUST00000203026;ENSMUST00000203195;ENSMUST00000203374;ENSMUST00000203853;ENSMUST00000203984;ENSMUST00000204362;ENSMUST00000204467	101142	Itfg2	integrin alpha FG-GAP repeat containing 2 [Source:MGI Symbol;Acc:MGI:1915450]	6	128386407	128401894	15488	-	215	187	177	181	167	109	195	251	177	107	159	293	223	258	114	187	115
ENSMUSG00000001521	ENSMUST00000001562;ENSMUST00000128708;ENSMUST00000133134;ENSMUST00000138313;ENSMUST00000157005;ENSMUST00000203625	22158	Tulp3	TUB like protein 3 [Source:MGI Symbol;Acc:MGI:1329045]	6	128298124	128332814	34691	-	12	19	21	25	19	14	42	57	23	8	43	40	29	31	6	31	18
ENSMUSG00000001524	ENSMUST00000001565;ENSMUST00000159671;ENSMUST00000159852;ENSMUST00000160039;ENSMUST00000160535;ENSMUST00000160711;ENSMUST00000160734;ENSMUST00000160752;ENSMUST00000162266;ENSMUST00000162604;ENSMUST00000162894;ENSMUST00000162927	14885	Gtf2h4	general transcription factor II H, polypeptide 4 [Source:MGI Symbol;Acc:MGI:1338799]	17	35978622	35984631	6010	-	240	262	255	281	196	183	246	273	249	175	224	304	248	361	133	178	153
ENSMUSG00000001525	ENSMUST00000001566;ENSMUST00000134978;ENSMUST00000156050;ENSMUST00000173253	22154	Tubb5	tubulin, beta 5 class I [Source:MGI Symbol;Acc:MGI:107812]	17	36144813	36149198	4386	-	1166	1180	1217	1312	1226	1296	3269	5333	3296	1993	2710	2142	1455	1675	662	1026	660
ENSMUSG00000001542	ENSMUST00000001583;ENSMUST00000220572;ENSMUST00000221432;ENSMUST00000221979;ENSMUST00000222194;ENSMUST00000222564;ENSMUST00000222853;ENSMUST00000222892;ENSMUST00000223535	192657	Ell2	elongation factor for RNA polymerase II 2 [Source:MGI Symbol;Acc:MGI:2183438]	13	75854876	75920483	65608	+	2025	2440	2466	1612	1523	1507	1174	1622	1830	1414	1586	1427	1401	1731	1256	1867	1251
ENSMUSG00000001552	ENSMUST00000001592;ENSMUST00000107403;ENSMUST00000123903;ENSMUST00000124659;ENSMUST00000128268;ENSMUST00000149798;ENSMUST00000151476;ENSMUST00000152774;ENSMUST00000155746	16480	Jup	junction plakoglobin [Source:MGI Symbol;Acc:MGI:96650]	11	100259784	100288589	28806	-	1120	1087	1310	833	866	320	1819	1747	539	338	1443	1146	945	1379	282	901	438
ENSMUSG00000001555	ENSMUST00000001595;ENSMUST00000107400;ENSMUST00000125616;ENSMUST00000134815;ENSMUST00000139084	14230	Fkbp10	FK506 binding protein 10 [Source:MGI Symbol;Acc:MGI:104769]	11	100306523	100315650	9128	+	29	29	32	51	46	27	116	69	39	26	122	24	18	22	13	25	7
ENSMUSG00000001569	ENSMUST00000001611;ENSMUST00000146347	433864	Nom1	nucleolar protein with MIF4G domain 1 [Source:MGI Symbol;Acc:MGI:1861749]	5	29639662	29662841	23180	+	458	434	475	388	326	234	504	615	350	208	374	569	430	564	202	573	234
ENSMUSG00000001576	ENSMUST00000001619;ENSMUST00000163213;ENSMUST00000165021;ENSMUST00000165802;ENSMUST00000167070;ENSMUST00000167662;ENSMUST00000170640;ENSMUST00000235197;ENSMUST00000235653;ENSMUST00000235915;ENSMUST00000236163;ENSMUST00000236481;ENSMUST00000236642;ENSMUST00000237902	67458	Ergic1	endoplasmic reticulum-golgi intermediate compartment 1 [Source:MGI Symbol;Acc:MGI:1914708]	17	26780463	26875908	95446	+	2189	1925	1897	1523	1384	798	2048	2399	1323	747	1600	2405	2081	2852	749	1814	1096
ENSMUSG00000001588	ENSMUST00000001631;ENSMUST00000108622;ENSMUST00000127238;ENSMUST00000148037	216859	Acap1	ArfGAP with coiled-coil, ankyrin repeat and PH domains 1 [Source:MGI Symbol;Acc:MGI:2388270]	11	69772393	69786365	13973	-	32	41	34	33	17	24	19	34	30	23	29	49	38	58	19	40	30
ENSMUSG00000001604	ENSMUST00000102533;ENSMUST00000136812;ENSMUST00000143942	21401	Tcea3	transcription elongation factor A (SII), 3 [Source:MGI Symbol;Acc:MGI:1196908]	4	135975040	136002209	27170	+	1440	2007	1934	1706	1355	1474	1796	2192	2236	1717	2016	1007	1306	1580	777	1256	959
ENSMUSG00000001622	ENSMUST00000001667;ENSMUST00000113267;ENSMUST00000113271;ENSMUST00000140690;ENSMUST00000144929;ENSMUST00000148793	12994	Csn3	casein kappa [Source:MGI Symbol;Acc:MGI:107461]	5	88073438	88080524	7087	+	0	0	0	0	4	8	62	3	4	18	41	1	0	0	0	0	0
ENSMUSG00000001627	ENSMUST00000001672;ENSMUST00000164047;ENSMUST00000164354;ENSMUST00000165027;ENSMUST00000169319;ENSMUST00000169926;ENSMUST00000170119;ENSMUST00000170752;ENSMUST00000171530;ENSMUST00000171553	15982	Ifrd1	interferon-related developmental regulator 1 [Source:MGI Symbol;Acc:MGI:1316717]	12	40251566	40298503	46938	-	409	364	412	305	419	599	434	593	1324	1075	578	329	238	380	344	521	369
ENSMUSG00000001630	ENSMUST00000001675;ENSMUST00000111644;ENSMUST00000203318	232533	Stk38l	serine/threonine kinase 38 like [Source:MGI Symbol;Acc:MGI:1922250]	6	146626493	146680310	53818	+	328.98	332	250	343	378	390	446	335.98	466.99	290	281	488	389	369	228.97	455.95	259
ENSMUSG00000001632	ENSMUST00000113117;ENSMUST00000113119;ENSMUST00000113121;ENSMUST00000113122;ENSMUST00000124530;ENSMUST00000131594;ENSMUST00000138737;ENSMUST00000203577;ENSMUST00000204198;ENSMUST00000204626	78783	Brpf1	bromodomain and PHD finger containing, 1 [Source:MGI Symbol;Acc:MGI:1926033]	6	113284098	113301821	17724	+	287	261	308	241	193	107	337	431	253	154	314	361	217	315	134	376	183
ENSMUSG00000001642	ENSMUST00000102980;ENSMUST00000126991;ENSMUST00000136559;ENSMUST00000142761;ENSMUST00000154655;ENSMUST00000201392	11677	Akr1b1	aldo-keto reductase family 1 member B [Source:MGI Symbol;Acc:MGI:1353494]	6	34279369	34294413	15045	-	146	194.75	138	291.88	278	245.92	494.87	561.72	764.07	393.89	513	209.97	145	146	158	210.91	168.89
ENSMUSG00000001663	ENSMUST00000001713;ENSMUST00000120177;ENSMUST00000139724	14871	Gstt1	glutathione S-transferase, theta 1 [Source:MGI Symbol;Acc:MGI:107379]	10	75619647	75634418	14772	-	5148	6041	4227	6246	5646	6332	4813	5526	10284	6581	5469	6060	6489	7130	3889	5242	4499
ENSMUSG00000001665	ENSMUST00000001715;ENSMUST00000133869;ENSMUST00000173537;ENSMUST00000174187;ENSMUST00000174649;ENSMUST00000218091	103140	Gstt3	glutathione S-transferase, theta 3 [Source:MGI Symbol;Acc:MGI:2143526]	10	75609949	75617248	7300	-	1339.93	1822	1662.78	1319	1651	1007	1732.2	897.19	1820.33	1498.59	1528.02	1191	2381	1950.99	913.08	1455	774
ENSMUSG00000001666	ENSMUST00000001716;ENSMUST00000172820	13202	Ddt	D-dopachrome tautomerase [Source:MGI Symbol;Acc:MGI:1298381]	10	75607064	75609248	2185	-	5160.97	5204	5539.97	5762	5163	7628	4029.95	4000.98	9722.96	9820.95	4978.98	4920	3889	6586.99	4526.98	3026	4591
ENSMUSG00000001670	ENSMUST00000001720;ENSMUST00000143741	234724	Tat	tyrosine aminotransferase [Source:MGI Symbol;Acc:MGI:98487]	8	110717069	110726435	9367	+	48433	55334	92835	20140	19452	10798	18726	21937	14537	17795	42147	14946	22960	29184	4127	13838	9401
ENSMUSG00000001672	ENSMUST00000001722;ENSMUST00000051430;ENSMUST00000155052	73608	Marveld3	MARVEL (membrane-associating) domain containing 3 [Source:MGI Symbol;Acc:MGI:1920858]	8	110674546	110688835	14290	-	18	12	53	21	14	19	14	11	22	23	20	17	12	19	7	7	1
ENSMUSG00000001674	ENSMUST00000001724;ENSMUST00000131471;ENSMUST00000134417;ENSMUST00000148809	66942	Ddx18	DEAD box helicase 18 [Source:MGI Symbol;Acc:MGI:1914192]	1	121481564	121495718	14155	-	342	352.94	359	414.82	317	294.08	459.89	558	511	323.91	353.93	599	368.93	457.85	245	482.15	277.82
ENSMUSG00000001687	ENSMUST00000079324;ENSMUST00000164904;ENSMUST00000201139;ENSMUST00000201595;ENSMUST00000201597;ENSMUST00000201688;ENSMUST00000202938	24109	Ubl3	ubiquitin-like 3 [Source:MGI Symbol;Acc:MGI:1344373]	5	148441445	148489599	48155	-	1382	1581	1363	1724	1647	2421	1400	1566	3452	2733	1289	1375	1128	1696	1311	1418	1294
ENSMUSG00000001700	ENSMUST00000070166;ENSMUST00000235794;ENSMUST00000237355;ENSMUST00000237422;ENSMUST00000237716	107022	Gramd2b	GRAM domain containing 2B [Source:MGI Symbol;Acc:MGI:1914815]	18	56533409	56636864	103456	+	1029	1320	720	940	892	690	899	1220	1116	702	837	772	769	1093	566	1057	688
ENSMUSG00000001707	ENSMUST00000001757;ENSMUST00000223823;ENSMUST00000224487	66143	Eef1e1	eukaryotic translation elongation factor 1 epsilon 1 [Source:MGI Symbol;Acc:MGI:1913393]	13	38828183	38843034	14852	-	215	214	209	276	259	363	215	268	761	580	219	250	183	214	208	274	254
ENSMUSG00000001729	ENSMUST00000001780;ENSMUST00000123563;ENSMUST00000127588;ENSMUST00000127902;ENSMUST00000128300;ENSMUST00000130342;ENSMUST00000139388;ENSMUST00000144550;ENSMUST00000159815	11651	Akt1	thymoma viral proto-oncogene 1 [Source:MGI Symbol;Acc:MGI:87986]	12	112620255	112641318	21064	-	1306	1067	1250	1142	1062	822	1863	2036	1282	828	1378	1520	956	1363	592	959	746
ENSMUSG00000001739	ENSMUST00000001790;ENSMUST00000111093;ENSMUST00000128391	60363	Cldn15	claudin 15 [Source:MGI Symbol;Acc:MGI:1913103]	5	136995470	137004712	9243	+	5	3	0	10	7	2	7	5	6	8	4	5	1	3	2	1	5
ENSMUSG00000001741	ENSMUST00000001792;ENSMUST00000131916;ENSMUST00000145610;ENSMUST00000151047;ENSMUST00000153560;ENSMUST00000156553	16170	Il16	interleukin 16 [Source:MGI Symbol;Acc:MGI:1270855]	7	83292033	83394934	102902	-	38	59	48	59	57	87	154	141	124	82	116	49	49	56	31	23	27
ENSMUSG00000001750	ENSMUST00000001801;ENSMUST00000122885;ENSMUST00000125792;ENSMUST00000126070;ENSMUST00000126643;ENSMUST00000127308;ENSMUST00000131327;ENSMUST00000132164;ENSMUST00000134698;ENSMUST00000135070;ENSMUST00000145791;ENSMUST00000159824;ENSMUST00000162688;ENSMUST00000236590	27060	Tcirg1	T cell, immune regulator 1, ATPase, H+ transporting, lysosomal V0 protein A3 [Source:MGI Symbol;Acc:MGI:1350931]	19	3946050	3957133	11084	-	813	831	815	737	709	411	1570	1385	726	387	1069	1012	682	970	238	580	406
ENSMUSG00000001751	ENSMUST00000001802;ENSMUST00000138409;ENSMUST00000140735	27419	Naglu	alpha-N-acetylglucosaminidase (Sanfilippo disease IIIB) [Source:MGI Symbol;Acc:MGI:1351641]	11	100960838	100968498	7661	+	677	764	636	767	548	519	832	890	779	476	861	746	626	830	374	617	462
ENSMUSG00000001755	ENSMUST00000001806;ENSMUST00000107308;ENSMUST00000151056;ENSMUST00000151686	71743	Coasy	Coenzyme A synthase [Source:MGI Symbol;Acc:MGI:1918993]	11	100973391	100977445	4055	+	3137	3559	3200	3576	2845	2744	2751	3201	3795	2449	2796	2978	2710	3799	2135	2661	2288
ENSMUSG00000001761	ENSMUST00000001812;ENSMUST00000201515	319757	Smo	smoothened, frizzled class receptor [Source:MGI Symbol;Acc:MGI:108075]	6	29735502	29761364	25863	+	206	180	136	248	153	198	265	400	312	165	272	321	193	312	138	223	178
ENSMUSG00000001763	ENSMUST00000046750;ENSMUST00000115250;ENSMUST00000137925	232670	Tspan33	tetraspanin 33 [Source:MGI Symbol;Acc:MGI:1919012]	6	29694221	29718558	24338	+	545	401	443	351	334	194	291	319	270	153	198	471	262	408	135	162	148
ENSMUSG00000001767	ENSMUST00000001818;ENSMUST00000145425;ENSMUST00000147904	66877	Crnkl1	crooked neck pre-mRNA splicing factor 1 [Source:MGI Symbol;Acc:MGI:1914127]	2	145759399	145776934	17536	-	373	297	245	370	287	263	336	335	400	215	267	465	318	369	218	413	199
ENSMUSG00000001768	ENSMUST00000094480;ENSMUST00000110005;ENSMUST00000137180;ENSMUST00000142847;ENSMUST00000144278;ENSMUST00000144661;ENSMUST00000145874;ENSMUST00000147976;ENSMUST00000149269;ENSMUST00000150449;ENSMUST00000231581	74030;408057	Rin2	Ras and Rab interactor 2 [Source:MGI Symbol;Acc:MGI:1921280]	2	145517135	145729536	212402	+	297	295	368	288	279	244	405	541	380	220	398	274	243	396	145	318	212
ENSMUSG00000001774	ENSMUST00000001825;ENSMUST00000213605;ENSMUST00000214441;ENSMUST00000215421;ENSMUST00000216526;ENSMUST00000216666;ENSMUST00000216800;ENSMUST00000217031;ENSMUST00000217083	66917	Chordc1	cysteine and histidine rich domain containing 1 [Source:MGI Symbol;Acc:MGI:1914167]	9	18203421	18228738	25318	+	753	876	851	870	792	773	880	796	1442	1025	583	1588	1125	1107	638	1132	674
ENSMUSG00000001783	ENSMUST00000001834;ENSMUST00000139413	28088	Rtcb	RNA 2',3'-cyclic phosphate and 5'-OH ligase [Source:MGI Symbol;Acc:MGI:106379]	10	85774501	85793687	19187	-	1272	1458	1236	1319	1207	853	1669	1828	1295	851	1622	1533	1183	1637	670	1256	594
ENSMUSG00000001785	ENSMUST00000001836;ENSMUST00000217667;ENSMUST00000219256;ENSMUST00000219626;ENSMUST00000219902	103136	Pwp1	PWP1 homolog, endonuclein [Source:MGI Symbol;Acc:MGI:1914735]	10	85665358	85724960	59603	+	281	317	292	311	318	280	414	422	486	362	313	532	349	369	241	388	247
ENSMUSG00000001786	ENSMUST00000001837;ENSMUST00000117597;ENSMUST00000120344;ENSMUST00000130320;ENSMUST00000130383;ENSMUST00000134490;ENSMUST00000147168	69754	Fbxo7	F-box protein 7 [Source:MGI Symbol;Acc:MGI:1917004]	10	85857836	85887737	29902	+	344	453	393	347	387	287	461	518	403	269	433	428	331	465	198	397	261
ENSMUSG00000001794	ENSMUST00000001845;ENSMUST00000108196;ENSMUST00000126116;ENSMUST00000129761;ENSMUST00000141851;ENSMUST00000146852;ENSMUST00000148973;ENSMUST00000207082	12336	Capns1	calpain, small subunit 1 [Source:MGI Symbol;Acc:MGI:88266]	7	29886361	29898236	11876	-	2583	2683	2663	2585	2551	1588	4652	4111	2949	1559	3814	2344	1908	2822	1032	2139	1287
ENSMUSG00000001802	ENSMUST00000118444;ENSMUST00000122409;ENSMUST00000153163;ENSMUST00000155404	435965	Lrp3	low density lipoprotein receptor-related protein 3 [Source:MGI Symbol;Acc:MGI:3584516]	7	34899452	34914923	15472	-	517	444	544	370	379	195	515	527	210	155	458	542	357	552	143	360	251
ENSMUSG00000001829	ENSMUST00000001884;ENSMUST00000106998;ENSMUST00000123870;ENSMUST00000136193;ENSMUST00000137214;ENSMUST00000142803;ENSMUST00000147439;ENSMUST00000150355;ENSMUST00000150832;ENSMUST00000153473;ENSMUST00000209579	20480	Clpb	ClpB caseinolytic peptidase B [Source:MGI Symbol;Acc:MGI:1100517]	7	101312840	101444713	131874	+	1106	1148	1046	819	826	424	989	1098	637	382	909	1074	970	1277	444	955	537
ENSMUSG00000001833	ENSMUST00000115272;ENSMUST00000165594;ENSMUST00000213435;ENSMUST00000213980;ENSMUST00000214360;ENSMUST00000214520;ENSMUST00000214911;ENSMUST00000215692;ENSMUST00000215721;ENSMUST00000217598	235072	Septin7	septin 7 [Source:MGI Symbol;Acc:MGI:1335094]	9	25163735	25219867	56133	+	875	932	877	1488	1181	1949	1293	1543	3360	2265	864	1087	868	1045	942	1174	914
ENSMUSG00000001844	ENSMUST00000001900;ENSMUST00000159718;ENSMUST00000159813;ENSMUST00000159941;ENSMUST00000160061;ENSMUST00000161199;ENSMUST00000161333;ENSMUST00000161915;ENSMUST00000162066;ENSMUST00000162284;ENSMUST00000162287;ENSMUST00000162358;ENSMUST00000162941	72881	Zdhhc4	zinc finger, DHHC domain containing 4 [Source:MGI Symbol;Acc:MGI:1920131]	5	143302244	143315011	12768	-	337	354	300	338	317	217	379	417	329	188	371	326	345	402	137	387	186
ENSMUSG00000001847	ENSMUST00000080537;ENSMUST00000100489;ENSMUST00000131513;ENSMUST00000145709	19353	Rac1	Rac family small GTPase 1 [Source:MGI Symbol;Acc:MGI:97845]	5	143489389	143513791	24403	-	3210	3386	3134	2935	2699	1868	3766	4530	3323	1982	3373	3146	2568	3648	1436	3591	1892
ENSMUSG00000001855	ENSMUST00000065398;ENSMUST00000123062;ENSMUST00000124455;ENSMUST00000126301;ENSMUST00000129496;ENSMUST00000130185;ENSMUST00000130975;ENSMUST00000138012;ENSMUST00000146138;ENSMUST00000152791;ENSMUST00000153096	227720	Nup214	nucleoporin 214 [Source:MGI Symbol;Acc:MGI:1095411]	2	31864448	31943987	79540	+	321	239	279	225	232	117	470	445	195	104	365	426	273	388	93	353	105
ENSMUSG00000001870	ENSMUST00000001927;ENSMUST00000112514;ENSMUST00000112516;ENSMUST00000127458;ENSMUST00000135447;ENSMUST00000135750;ENSMUST00000146839;ENSMUST00000234008;ENSMUST00000234327;ENSMUST00000234490	268977	Ltbp1	latent transforming growth factor beta binding protein 1 [Source:MGI Symbol;Acc:MGI:109151]	17	75312563	75699507	386945	+	53	48	37	41	52	40	53	84	50	28	67	39	42	50	24	58	29
ENSMUSG00000001891	ENSMUST00000060895;ENSMUST00000102875;ENSMUST00000133343;ENSMUST00000143890	216558	Ugp2	UDP-glucose pyrophosphorylase 2 [Source:MGI Symbol;Acc:MGI:2183447]	11	21271138	21321201	50064	-	9920	14443	9587	15237	12020	16584	11527	19419	46678	32043	11808	10935	12446	14993	17706	29632	19697
ENSMUSG00000001909	ENSMUST00000001974;ENSMUST00000077990;ENSMUST00000109767;ENSMUST00000109768;ENSMUST00000125370;ENSMUST00000127915;ENSMUST00000128022;ENSMUST00000128537;ENSMUST00000131700;ENSMUST00000136423;ENSMUST00000137953;ENSMUST00000138300;ENSMUST00000143427;ENSMUST00000148118;ENSMUST00000150085;ENSMUST00000152301;ENSMUST00000175704;ENSMUST00000175767;ENSMUST00000175784;ENSMUST00000175870;ENSMUST00000175884;…	212528	Trmt1	tRNA methyltransferase 1 [Source:MGI Symbol;Acc:MGI:1289155]	8	85412936	85426437	13502	+	600	674	618	580	511	315	702	765	571	390	589	713	535	745	316	536	359
ENSMUSG00000001910	ENSMUST00000001975;ENSMUST00000238301;ENSMUST00000238434;ENSMUST00000238449;ENSMUST00000238687	66830	Nacc1	nucleus accumbens associated 1, BEN and BTB (POZ) domain containing [Source:MGI Symbol;Acc:MGI:1914080]	8	85397108	85414531	17424	-	733.93	687	797	550	547	177	1160	1202	355	167	901	1085	775	932	225	641	301
ENSMUSG00000001911	ENSMUST00000076715;ENSMUST00000099070;ENSMUST00000109762;ENSMUST00000109764;ENSMUST00000126806;ENSMUST00000132236;ENSMUST00000148644;ENSMUST00000148746	18032	Nfix	nuclear factor I/X [Source:MGI Symbol;Acc:MGI:97311]	8	85426505	85526973	100469	-	2874	2799	2477	1746	1421	366	2452	3585	657	287	2203	2003	1797	2590	573	2368	1101
ENSMUSG00000001918	ENSMUST00000108496;ENSMUST00000127401;ENSMUST00000131664;ENSMUST00000134407;ENSMUST00000135817;ENSMUST00000141349;ENSMUST00000147814;ENSMUST00000206444	20514	Slc1a5	solute carrier family 1 (neutral amino acid transporter), member 5 [Source:MGI Symbol;Acc:MGI:105305]	7	16515265	16532199	16935	+	29	24	34	42	37	30	100	93	88	39	75	45	23	39	6	40	11
ENSMUSG00000001924	ENSMUST00000001989;ENSMUST00000089217;ENSMUST00000130694;ENSMUST00000136915;ENSMUST00000137892;ENSMUST00000152235	22201	Uba1	ubiquitin-like modifier activating enzyme 1 [Source:MGI Symbol;Acc:MGI:98890]	X	20524565	20549418	24854	+	4642	4467	4014	3901	3371	2184	4618	5240	3382	1941	4112	5249	4196	5671	2238	4373	2589
ENSMUSG00000001930	ENSMUST00000100941;ENSMUST00000112253;ENSMUST00000112254;ENSMUST00000126709;ENSMUST00000129436;ENSMUST00000134073;ENSMUST00000139678;ENSMUST00000141521;ENSMUST00000146264;ENSMUST00000147101;ENSMUST00000150548	22371	Vwf	Von Willebrand factor [Source:MGI Symbol;Acc:MGI:98941]	6	125523737	125663642	139906	+	161	128	111	104	133	81	176	191	97	55	101	188	171	179	51	194	61
ENSMUSG00000001942	ENSMUST00000002007;ENSMUST00000213126;ENSMUST00000213964;ENSMUST00000215474;ENSMUST00000215678;ENSMUST00000215829;ENSMUST00000217567	22619	Siae	sialic acid acetylesterase [Source:MGI Symbol;Acc:MGI:104803]	9	37466994	37560951	93958	+	1138	1246	1360	1182	1355	879	1795	1828	1345	828	2021	1172	1063	1421	743	1610	852
ENSMUSG00000001946	ENSMUST00000002011;ENSMUST00000123198;ENSMUST00000131832;ENSMUST00000144596;ENSMUST00000146860;ENSMUST00000214142	69524	Esam	endothelial cell-specific adhesion molecule [Source:MGI Symbol;Acc:MGI:1916774]	9	37439374	37449615	10242	+	134	151	169	177	148	171	231	216	163	191	227	163	119	174	76	117	76
ENSMUSG00000001948	ENSMUST00000002013;ENSMUST00000214786;ENSMUST00000215336	20686	Spa17	sperm autoantigenic protein 17 [Source:MGI Symbol;Acc:MGI:1333778]	9	37514586	37525018	10433	-	9	10	11	16	6	10	11	8	28	25	14	6	3	6	3	7	10
ENSMUSG00000001962	ENSMUST00000114160;ENSMUST00000138242;ENSMUST00000149312	108160	Fam50a	family with sequence similarity 50, member A [Source:MGI Symbol;Acc:MGI:1351626]	X	73356639	73363755	7117	+	396	498	413	388	318	340	479	500	530	338	380	503	341	501	237	371	217
ENSMUSG00000001964	ENSMUST00000002029;ENSMUST00000088313;ENSMUST00000096424;ENSMUST00000119197;ENSMUST00000129516;ENSMUST00000152288	13726	Emd	emerin [Source:MGI Symbol;Acc:MGI:108117]	X	73298293	73305154	6862	+	292.04	309.06	310.88	372.05	298.14	405.06	368.09	453.54	661.28	458.69	344.06	402.05	330.14	425.75	204.05	250.89	187.45
ENSMUSG00000001983	ENSMUST00000002048	70207	Taco1	translational activator of mitochondrially encoded cytochrome c oxidase I [Source:MGI Symbol;Acc:MGI:1917457]	11	105956887	105964438	7552	+	344	345	334	561	340	369	280	379	461	293	284	395	351	474	289	392	294
ENSMUSG00000001986	ENSMUST00000076349;ENSMUST00000115103;ENSMUST00000124169;ENSMUST00000126843;ENSMUST00000128197;ENSMUST00000139965;ENSMUST00000148212;ENSMUST00000156721;ENSMUST00000165288	53623	Gria3	glutamate receptor, ionotropic, AMPA3 (alpha 3) [Source:MGI Symbol;Acc:MGI:95810]	X	40489731	40767478	277748	+	14	20	31	18	19	14	36	54	35	35	88	322	151	275	150	305	165
ENSMUSG00000001995	ENSMUST00000108775;ENSMUST00000212168;ENSMUST00000212604;ENSMUST00000212987	244668	Sipa1l2	signal-induced proliferation-associated 1 like 2 [Source:MGI Symbol;Acc:MGI:2676970]	8	126144802	126296547	151746	-	71	104	222	111	112	48	215	198	105	52	202	68	81	85	48	162	71
ENSMUSG00000001998	ENSMUST00000002063;ENSMUST00000110393;ENSMUST00000110394;ENSMUST00000129859;ENSMUST00000142740;ENSMUST00000149254;ENSMUST00000175663;ENSMUST00000177372	108011	Ap4e1	adaptor-related protein complex AP-4, epsilon 1 [Source:MGI Symbol;Acc:MGI:1336993]	2	126850637	126909829	59193	+	119	118	111	121	90	82	150	176	126	72	152	145	108	148	82	186	112
ENSMUSG00000001999	ENSMUST00000002064;ENSMUST00000110389;ENSMUST00000135529;ENSMUST00000142737;ENSMUST00000142861	109778	Blvra	biliverdin reductase A [Source:MGI Symbol;Acc:MGI:88170]	2	126912585	126939004	26420	+	237	280	195	360	321	519	320	396	920	502	267	237	195	249	242	262	216
ENSMUSG00000002010	ENSMUST00000052761;ENSMUST00000129070;ENSMUST00000129367;ENSMUST00000130119;ENSMUST00000140944;ENSMUST00000142707;ENSMUST00000145341;ENSMUST00000148419;ENSMUST00000156299	15929	Idh3g	isocitrate dehydrogenase 3 (NAD+), gamma [Source:MGI Symbol;Acc:MGI:1099463]	X	72822569	72830503	7935	-	1279	1493	1199	1554	1278	1046	1451	1678	1704	1065	1392	1245	1243	1575	864	1315	944
ENSMUSG00000002014	ENSMUST00000002090;ENSMUST00000129239;ENSMUST00000130738;ENSMUST00000136544;ENSMUST00000141721;ENSMUST00000142829;ENSMUST00000155552;ENSMUST00000166518	20832	Ssr4	signal sequence receptor, delta [Source:MGI Symbol;Acc:MGI:1099464]	X	72830634	72834436	3803	+	1811	2286	1479	2537	2180	4109	1979	2082	5086	3807	1876	2624	1703	2270	1727	1836	2163
ENSMUSG00000002015	ENSMUST00000002091	27061	Bcap31	B cell receptor associated protein 31 [Source:MGI Symbol;Acc:MGI:1350933]	X	72729784	72759781	29998	-	3025	3489	3063	3631	3224	3464	3125	3338	5361	3121	3002	2867	2526	3286	2370	2899	2381
ENSMUSG00000002017	ENSMUST00000112507;ENSMUST00000140729;ENSMUST00000141969;ENSMUST00000234785;ENSMUST00000235026	72722	Fam98a	family with sequence similarity 98, member A [Source:MGI Symbol;Acc:MGI:1919972]	17	75844081	75858941	14861	-	634	599	574	714	559	531	846	898	914	556	636	985	641	719	353	849	391
ENSMUSG00000002020	ENSMUST00000002073;ENSMUST00000110254;ENSMUST00000163189;ENSMUST00000163214;ENSMUST00000165141;ENSMUST00000166383;ENSMUST00000168699	16997	Ltbp2	latent transforming growth factor beta binding protein 2 [Source:MGI Symbol;Acc:MGI:99502]	12	84829986	84923306	93321	-	14	15	17	15	41	27	79	59	24	21	74	10	16	28	4	12	5
ENSMUSG00000002028	ENSMUST00000002095;ENSMUST00000114689;ENSMUST00000128768;ENSMUST00000138119;ENSMUST00000152241;ENSMUST00000215489	214162	Kmt2a	lysine (K)-specific methyltransferase 2A [Source:MGI Symbol;Acc:MGI:96995]	9	44714652	44792594	77943	-	474	419	597	267	244	99	488	635	151	81	458	529	497	697	117	692	241
ENSMUSG00000002031	ENSMUST00000002099;ENSMUST00000118186;ENSMUST00000124534;ENSMUST00000125877;ENSMUST00000128150;ENSMUST00000133167;ENSMUST00000142586;ENSMUST00000143654;ENSMUST00000147559;ENSMUST00000149020;ENSMUST00000151905;ENSMUST00000154090;ENSMUST00000214854;ENSMUST00000238800;ENSMUST00000239014	76568	Ift46	intraflagellar transport 46 [Source:MGI Symbol;Acc:MGI:1923818]	9	44679205	44704744	25540	+	599	654	617	671	588	568	700	912	840	548	660	529	436	644	421	651	408
ENSMUSG00000002032	ENSMUST00000002100;ENSMUST00000114705;ENSMUST00000132020;ENSMUST00000213203;ENSMUST00000213363;ENSMUST00000213972;ENSMUST00000214431;ENSMUST00000214833	71687	Tmem25	transmembrane protein 25 [Source:MGI Symbol;Acc:MGI:1918937]	9	44705066	44710604	5539	-	1110	1490	1267	717	589	355	744	1063	434	336	723	540	659	992	383	950	641
ENSMUSG00000002033	ENSMUST00000002101;ENSMUST00000159019;ENSMUST00000160886	12502	Cd3g	CD3 antigen, gamma polypeptide [Source:MGI Symbol;Acc:MGI:88333]	9	44880870	44891729	10860	-	5	9	6	6	4	9	12	19	12	11	4	7	9	12	2	2	3
ENSMUSG00000002043	ENSMUST00000002112;ENSMUST00000108455;ENSMUST00000129808;ENSMUST00000135972;ENSMUST00000136873;ENSMUST00000147114;ENSMUST00000207730	67091	Trappc6a	trafficking protein particle complex 6A [Source:MGI Symbol;Acc:MGI:1914341]	7	19242320	19250070	7751	+	213	238	200	316	341	438	297	251	551	393	322	214	183	255	171	145	193
ENSMUSG00000002052	ENSMUST00000002121;ENSMUST00000108314	20926	Supt6	SPT6, histone chaperone and transcription elongation factor [Source:MGI Symbol;Acc:MGI:107726]	11	78097572	78136813	39242	-	1117	989	1214	701	664	254	1293	1328	441	239	1148	1681	1038	1387	225	1236	405
ENSMUSG00000002055	ENSMUST00000045026;ENSMUST00000125477;ENSMUST00000128359;ENSMUST00000133579;ENSMUST00000141026;ENSMUST00000146068;ENSMUST00000149711;ENSMUST00000150016	54141	Spag5	sperm associated antigen 5 [Source:MGI Symbol;Acc:MGI:1927470]	11	78192355	78213283	20929	+	19	6	10	22	31	30	111	286	196	67	130	9	8	4	11	6	6
ENSMUSG00000002058	ENSMUST00000002127;ENSMUST00000100755;ENSMUST00000108295;ENSMUST00000125720;ENSMUST00000149161;ENSMUST00000154700;ENSMUST00000155471	22248	Unc119	unc-119 lipid binding chaperone [Source:MGI Symbol;Acc:MGI:1328357]	11	78234308	78239990	5683	+	107	109	80	128	116	139	122	158	234	131	130	123	65	123	69	46	77
ENSMUSG00000002059	ENSMUST00000002128;ENSMUST00000056241;ENSMUST00000108322;ENSMUST00000126864;ENSMUST00000148603;ENSMUST00000150941;ENSMUST00000154542;ENSMUST00000156435;ENSMUST00000207728	19376	Rab34	RAB34, member RAS oncogene family [Source:MGI Symbol;Acc:MGI:104606]	11	78079256	78083019	3764	+	96	79	60	94	78	64	162	192	130	70	179	125	80	101	54	104	57
ENSMUSG00000002064	ENSMUST00000002133;ENSMUST00000133020;ENSMUST00000154080	20316	Sdf2	stromal cell derived factor 2 [Source:MGI Symbol;Acc:MGI:108019]	11	78136572	78146322	9751	+	611	595	615	791	727	981	711	659	1373	1033	612	592	484	744	489	478	457
ENSMUSG00000002068	ENSMUST00000108023;ENSMUST00000124979;ENSMUST00000128785;ENSMUST00000130329;ENSMUST00000137097	12447	Ccne1	cyclin E1 [Source:MGI Symbol;Acc:MGI:88316]	7	37797409	37806959	9551	-	32	14	41	42	35	67	108	161	177	155	127	13	5	13	36	61	58
ENSMUSG00000002076	ENSMUST00000002145;ENSMUST00000133308;ENSMUST00000138172;ENSMUST00000236321;ENSMUST00000237527;ENSMUST00000238192	74377	Hsf2bp	heat shock transcription factor 2 binding protein [Source:MGI Symbol;Acc:MGI:1921627]	17	32163743	32255323	91581	-	0	5	11	2	4	9	3	6	11	10	8	7	4	6	3	2	3
ENSMUSG00000002083	ENSMUST00000002152;ENSMUST00000136781;ENSMUST00000147267;ENSMUST00000209688	170770	Bbc3	BCL2 binding component 3 [Source:MGI Symbol;Acc:MGI:2181667]	7	16042318	16052130	9813	+	94	105	104	141	148	70	187	178	122	52	78	386	303	443	52	16	73
ENSMUSG00000002102	ENSMUST00000002171;ENSMUST00000067663;ENSMUST00000111441;ENSMUST00000131473;ENSMUST00000141462;ENSMUST00000145317;ENSMUST00000146506;ENSMUST00000151419;ENSMUST00000152269;ENSMUST00000185715	19182	Psmc3	proteasome (prosome, macropain) 26S subunit, ATPase 3 [Source:MGI Symbol;Acc:MGI:1098754]	2	90884354	90896714	12361	+	2385	2659	2200	3491	2847	3531	2855	3309	5483	3573	2519	2560	2017	2925	1830	2304	1870
ENSMUSG00000002103	ENSMUST00000002172;ENSMUST00000124131;ENSMUST00000127643;ENSMUST00000150403;ENSMUST00000155418;ENSMUST00000238832;ENSMUST00000239169	11432	Acp2	acid phosphatase 2, lysosomal [Source:MGI Symbol;Acc:MGI:87882]	2	91033230	91044443	11214	+	1208	1242	1231	1172	990	704	1568	1574	1058	581	1306	1270	1193	1567	530	1146	681
ENSMUSG00000002105	ENSMUST00000073575;ENSMUST00000079976;ENSMUST00000111436;ENSMUST00000123685;ENSMUST00000130252;ENSMUST00000133047;ENSMUST00000141328;ENSMUST00000142943;ENSMUST00000149430;ENSMUST00000150348;ENSMUST00000153367	68427	Slc39a13	solute carrier family 39 (metal ion transporter), member 13 [Source:MGI Symbol;Acc:MGI:1915677]	2	90892136	90900762	8627	-	184	165	188	144	122	75	381	488	171	90	281	207	191	235	67	186	112
ENSMUSG00000002107	ENSMUST00000002176;ENSMUST00000100429;ENSMUST00000114923;ENSMUST00000114924;ENSMUST00000114927;ENSMUST00000114934;ENSMUST00000123142;ENSMUST00000126742;ENSMUST00000137733;ENSMUST00000138347;ENSMUST00000142941;ENSMUST00000148321;ENSMUST00000150624;ENSMUST00000170438;ENSMUST00000182037;ENSMUST00000182355;ENSMUST00000182404;ENSMUST00000182523;ENSMUST00000182560;ENSMUST00000182657;ENSMUST00000182706;…	14007	Celf2	CUGBP, Elav-like family member 2 [Source:MGI Symbol;Acc:MGI:1338822]	2	6544505	7514374	969870	-	165	125	168	163	198	94	296	295	165	91	181	151	132	176	56	152	84
ENSMUSG00000002108	ENSMUST00000002177;ENSMUST00000111354;ENSMUST00000111355;ENSMUST00000111356;ENSMUST00000130031;ENSMUST00000133261;ENSMUST00000136234;ENSMUST00000150654	22259	Nr1h3	nuclear receptor subfamily 1, group H, member 3 [Source:MGI Symbol;Acc:MGI:1352462]	2	91014406	91033179	18774	-	2009	2077	2080	2735	2225	2905	1913	2311	4241	3201	1751	2063	1733	2332	1558	1336	1514
ENSMUSG00000002109	ENSMUST00000028696;ENSMUST00000111352;ENSMUST00000135927;ENSMUST00000150427;ENSMUST00000152277	107986	Ddb2	damage specific DNA binding protein 2 [Source:MGI Symbol;Acc:MGI:1355314]	2	91041917	91067327	25411	-	66	84	87	114	172	119	192	147	301	196	149	83	77	119	80	114	89
ENSMUSG00000002111	ENSMUST00000002180;ENSMUST00000131400;ENSMUST00000132741;ENSMUST00000169852;ENSMUST00000249728;ENSMUST00000249729	20375	Spi1	Spi-1 proto-oncogene [Source:MGI Symbol;Acc:MGI:98282]	2	90912735	90946101	33367	+	57	63	86	120	115	115	368	413	308	113	160	72	36	73	21	31	15
ENSMUSG00000002129	ENSMUST00000002198;ENSMUST00000129583;ENSMUST00000132666;ENSMUST00000133095	67465	Sf3a1	splicing factor 3a, subunit 1 [Source:MGI Symbol;Acc:MGI:1914715]	11	4110350	4132541	22192	+	523	497	573	485	375	312	775	812	483	312	573	870	529	636	221	658	242
ENSMUSG00000002147	ENSMUST00000092074;ENSMUST00000120279;ENSMUST00000128072;ENSMUST00000145470;ENSMUST00000156231	20852	Stat6	signal transducer and activator of transcription 6 [Source:MGI Symbol;Acc:MGI:103034]	10	127478855	127496826	17972	+	1552	1431	1354	1278	1039	722	1791	2244	1243	669	1507	1589	1306	1760	655	1610	890
ENSMUSG00000002204	ENSMUST00000002274;ENSMUST00000153124;ENSMUST00000207302;ENSMUST00000207543;ENSMUST00000208514	16541	Napsa	napsin A aspartic peptidase [Source:MGI Symbol;Acc:MGI:109365]	7	44221804	44236286	14483	+	3	6	4	18	21	20	50	39	65	26	29	16	2	5	2	3	4
ENSMUSG00000002205	ENSMUST00000002275;ENSMUST00000125705;ENSMUST00000134750;ENSMUST00000135783;ENSMUST00000136069;ENSMUST00000144515;ENSMUST00000147952;ENSMUST00000165957;ENSMUST00000171821;ENSMUST00000208083	101568	Vrk3	vaccinia related kinase 3 [Source:MGI Symbol;Acc:MGI:2182465]	7	44397837	44426939	29103	+	589	600	641	582	611	493	777	846	801	579	792	656	493	763	374	550	385
ENSMUSG00000002210	ENSMUST00000002280;ENSMUST00000108434;ENSMUST00000123188;ENSMUST00000139481;ENSMUST00000146381;ENSMUST00000146686;ENSMUST00000148288	71997	Smg9	SMG9 nonsense mediated mRNA decay factor [Source:MGI Symbol;Acc:MGI:1919247]	7	24099044	24122203	23160	+	223	192	171	130	128	60	235	250	108	70	167	200	184	245	72	171	94
ENSMUSG00000002221	ENSMUST00000002291;ENSMUST00000196605;ENSMUST00000196641;ENSMUST00000196734;ENSMUST00000197625;ENSMUST00000199714;ENSMUST00000199993	55982	Paxip1	PAX interacting (with transcription-activation domain) protein 1 [Source:MGI Symbol;Acc:MGI:1890430]	5	27945078	27996689	51612	-	417	451	487	391	400	283	536	729	482	271	433	471	352	541	186	430	228
ENSMUSG00000002222	ENSMUST00000002292;ENSMUST00000123947;ENSMUST00000140696;ENSMUST00000144081;ENSMUST00000149415	68477	Rmnd5a	required for meiotic nuclear division 5 homolog A [Source:MGI Symbol;Acc:MGI:1915727]	6	71365618	71417621	52004	-	4121	4369	3900	3222	2807	2152	2748	4146	2282	1573	3138	3059	3037	4139	1991	5511	2282
ENSMUSG00000002227	ENSMUST00000002297;ENSMUST00000106774;ENSMUST00000106775;ENSMUST00000136148;ENSMUST00000145414;ENSMUST00000166979;ENSMUST00000168015;ENSMUST00000196161;ENSMUST00000196211	17454	Mov10	Mov10 RISC complex RNA helicase [Source:MGI Symbol;Acc:MGI:97054]	3	104702152	104725879	23728	-	578	574	690	560	486	228	1060	1066	426	208	1074	482	335	455	153	425	307
ENSMUSG00000002228	ENSMUST00000002298;ENSMUST00000197264	71887	Ppm1j	protein phosphatase 1J [Source:MGI Symbol;Acc:MGI:1919137]	3	104688372	104693334	4963	+	3	2	2	9	4	2	11	2	10	5	10	9	7	5	0	1	0
ENSMUSG00000002233	ENSMUST00000002303;ENSMUST00000106787;ENSMUST00000132721;ENSMUST00000176347;ENSMUST00000196817;ENSMUST00000199824	11853	Rhoc	ras homolog family member C [Source:MGI Symbol;Acc:MGI:106028]	3	104695691	104701775	6085	+	178	158	223	314	292	418	542	318	494	531	487	194	108	165	119	92	94
ENSMUSG00000002249	ENSMUST00000114799;ENSMUST00000127212;ENSMUST00000146668;ENSMUST00000151557;ENSMUST00000154873;ENSMUST00000156862;ENSMUST00000219703;ENSMUST00000226172;ENSMUST00000233330	21678	Tead3	TEA domain family member 3 [Source:MGI Symbol;Acc:MGI:109241]	17	28550645	28569791	19147	-	199	184	216	187	146	66	243	243	81	31	199	248	185	316	77	190	118
ENSMUSG00000002250	ENSMUST00000002320;ENSMUST00000123020;ENSMUST00000142226;ENSMUST00000144200;ENSMUST00000166744;ENSMUST00000169040;ENSMUST00000232879;ENSMUST00000233383;ENSMUST00000233761	19015;69050	Ppard	peroxisome proliferator activator receptor delta [Source:MGI Symbol;Acc:MGI:101884]	17	28451674	28520448	68775	+	165	157	137	71	73	22	205	201	55	22	154	823	637	460	33	155	59
ENSMUSG00000002257	ENSMUST00000002327;ENSMUST00000146724;ENSMUST00000233170;ENSMUST00000233205;ENSMUST00000233264;ENSMUST00000233534;ENSMUST00000233560;ENSMUST00000233958	23853	Def6	differentially expressed in FDCP 6 [Source:MGI Symbol;Acc:MGI:1346328]	17	28426752	28447582	20831	+	2	4	3	7	4	5	30	28	12	5	10	7	5	2	0	4	0
ENSMUSG00000002265	ENSMUST00000051209;ENSMUST00000143703;ENSMUST00000150182;ENSMUST00000155910;ENSMUST00000239104	18616	Peg3	paternally expressed 3 [Source:MGI Symbol;Acc:MGI:104748]	7	6706891	6733430	26540	-	172	157	254	80	103	68	130	197	121	75	167	203	218	328	56	219	117
ENSMUSG00000002274	ENSMUST00000165838;ENSMUST00000235294;ENSMUST00000235925;ENSMUST00000236963;ENSMUST00000237849;ENSMUST00000238040	70083	Metrn	meteorin, glial cell differentiation regulator [Source:MGI Symbol;Acc:MGI:1917333]	17	26012195	26016057	3863	-	108	89	93	114	107	97	93	105	123	88	119	76	68	101	25	38	45
ENSMUSG00000002279	ENSMUST00000063344;ENSMUST00000116641;ENSMUST00000126164;ENSMUST00000127280;ENSMUST00000128146;ENSMUST00000137201;ENSMUST00000141606;ENSMUST00000142264;ENSMUST00000154842;ENSMUST00000156868	76483	Lmf1	lipase maturation factor 1 [Source:MGI Symbol;Acc:MGI:1923733]	17	25798059	25881800	83742	+	1136	1144	823	955	874	454	885	1007	632	318	803	1051	889	1063	430	698	529
ENSMUSG00000002280	ENSMUST00000002350;ENSMUST00000130861;ENSMUST00000131458;ENSMUST00000134108;ENSMUST00000149645;ENSMUST00000154711;ENSMUST00000236424;ENSMUST00000237541	67563	Ciao3	cytosolic iron-sulfur assembly component 3 [Source:MGI Symbol;Acc:MGI:1914813]	17	25992750	26002306	9557	+	454	541	493	680	554	563	482	567	844	551	427	552	461	612	333	411	392
ENSMUSG00000002289	ENSMUST00000002360;ENSMUST00000173869;ENSMUST00000174858;ENSMUST00000174872	57875	Angptl4	angiopoietin-like 4 [Source:MGI Symbol;Acc:MGI:1888999]	17	33992724	34000804	8081	-	3657	3316	1406	680	2004	2479	1623	1744	2268	2175	3063	520	1358	3349	2110	1387	1284
ENSMUSG00000002297	ENSMUST00000002368;ENSMUST00000163141;ENSMUST00000166364;ENSMUST00000168500;ENSMUST00000168637;ENSMUST00000170927;ENSMUST00000171808;ENSMUST00000197442;ENSMUST00000198785	27214	Dbf4	DBF4 zinc finger [Source:MGI Symbol;Acc:MGI:1351328]	5	8446973	8472716	25744	-	116	77	91	58	97	66	240	347	252	178	172	44	28	46	27	92	45
ENSMUSG00000002307	ENSMUST00000079421;ENSMUST00000170075;ENSMUST00000172859;ENSMUST00000173028;ENSMUST00000173279;ENSMUST00000173626;ENSMUST00000174146;ENSMUST00000174541;ENSMUST00000174646;ENSMUST00000234670	13163	Daxx	Fas death domain-associated protein [Source:MGI Symbol;Acc:MGI:1197015]	17	34128388	34134564	6177	+	315	255	266	251	240	139	433	387	224	143	265	359	268	334	119	295	175
ENSMUSG00000002308	ENSMUST00000002379;ENSMUST00000087559;ENSMUST00000173418;ENSMUST00000234506	54219	Cd320	CD320 antigen [Source:MGI Symbol;Acc:MGI:1860083]	17	34062065	34068748	6684	+	86	115	94	93	99	144	119	91	223	203	93	102	59	92	61	63	55
ENSMUSG00000002319	ENSMUST00000047131;ENSMUST00000125133;ENSMUST00000126064;ENSMUST00000127773;ENSMUST00000135221;ENSMUST00000141499;ENSMUST00000141848;ENSMUST00000146528;ENSMUST00000148351;ENSMUST00000148942;ENSMUST00000150951;ENSMUST00000155464;ENSMUST00000228754	75751	Ipo4	importin 4 [Source:MGI Symbol;Acc:MGI:1923001]	14	55862857	55873414	10558	-	731.07	729.24	779.06	536.28	439	330	885	995	536	297	749	1042.47	739.09	1013.52	315.04	717.72	434.24
ENSMUSG00000002320	ENSMUST00000002391;ENSMUST00000120041;ENSMUST00000121791;ENSMUST00000121937;ENSMUST00000122358;ENSMUST00000127473;ENSMUST00000130167;ENSMUST00000132338;ENSMUST00000133707;ENSMUST00000138085;ENSMUST00000139313;ENSMUST00000146588;ENSMUST00000149726	74140	Tm9sf1	transmembrane 9 superfamily member 1 [Source:MGI Symbol;Acc:MGI:1921390]	14	55873422	55881263	7842	-	1406.31	1234.73	1239.48	1189.15	1135	750	1466	1574	996	643	1315	1554.39	1266.28	1657.22	610.24	1137.26	751.32
ENSMUSG00000002324	ENSMUST00000002395;ENSMUST00000141425;ENSMUST00000155193;ENSMUST00000227922	56739	Rec8	REC8 meiotic recombination protein [Source:MGI Symbol;Acc:MGI:1929645]	14	55855494	55862852	7359	+	65	55	22	90	67	28	51	61	70	16	14	46	37	58	17	32	19
ENSMUSG00000002325	ENSMUST00000126269;ENSMUST00000130697;ENSMUST00000134863;ENSMUST00000136109;ENSMUST00000138037;ENSMUST00000145680;ENSMUST00000226275	16391	Irf9	interferon regulatory factor 9 [Source:MGI Symbol;Acc:MGI:107587]	14	55841028	55847487	6460	+	816	918	633	595	597	556	954	913	833	421	577	846	616	715	398	598	402
ENSMUSG00000002326	ENSMUST00000002397;ENSMUST00000226735;ENSMUST00000226787;ENSMUST00000227178;ENSMUST00000227696;ENSMUST00000227914	105446	Gmpr2	guanosine monophosphate reductase 2 [Source:MGI Symbol;Acc:MGI:1917903]	14	55909398	55916657	7260	+	308	321	278	395	327	417	363	449	700	425	278	302	256	347	244	302	246
ENSMUSG00000002329	ENSMUST00000002400;ENSMUST00000226659;ENSMUST00000228093	67881	Mdp1	magnesium-dependent phosphatase 1 [Source:MGI Symbol;Acc:MGI:1915131]	14	55895336	55897965	2630	-	309	329	252	442	371	383	318	418	669	384	310	434	304	408	235	259	198
ENSMUSG00000002332	ENSMUST00000002403;ENSMUST00000128802;ENSMUST00000142043;ENSMUST00000155969	52585	Dhrs1	dehydrogenase/reductase 1 [Source:MGI Symbol;Acc:MGI:1196314]	14	55976477	55983147	6671	-	3010	3217	2174	2992	2365	2392	1892	2626	3026	1590	1672	3174	2866	3868	1834	2607	2223
ENSMUSG00000002342	ENSMUST00000002413;ENSMUST00000123923;ENSMUST00000125755;ENSMUST00000125906;ENSMUST00000126268;ENSMUST00000133084;ENSMUST00000133339;ENSMUST00000143543;ENSMUST00000147656;ENSMUST00000149105;ENSMUST00000182365;ENSMUST00000182715;ENSMUST00000182942;ENSMUST00000182980	234371	Tmem161a	transmembrane protein 161A [Source:MGI Symbol;Acc:MGI:2384577]	8	70625006	70636331	11326	+	286	319	300	312	286	180	357	366	286	187	292	406	294	392	136	204	169
ENSMUSG00000002343	ENSMUST00000019679;ENSMUST00000130319;ENSMUST00000135931;ENSMUST00000136666;ENSMUST00000139765;ENSMUST00000147387	76813	Armc6	armadillo repeat containing 6 [Source:MGI Symbol;Acc:MGI:1924063]	8	70672822	70687116	14295	-	103	104	97	87	89	79	96	106	124	121	77	149	98	114	76	87	55
ENSMUSG00000002345	ENSMUST00000002418;ENSMUST00000110139;ENSMUST00000123760;ENSMUST00000123976;ENSMUST00000129668	72368	Borcs8	BLOC-1 related complex subunit 8 [Source:MGI Symbol;Acc:MGI:1919618]	8	70592149	70599969	7821	+	183	189	182	198	174	210	233	242	269	194	193	211	157	247	92	104	102
ENSMUSG00000002346	ENSMUST00000110127;ENSMUST00000134596;ENSMUST00000139333;ENSMUST00000150706	73095	Slc25a42	solute carrier family 25, member 42 [Source:MGI Symbol;Acc:MGI:1920345]	8	70636990	70664955	27966	-	2347	1881	1801	1410	1639	507	1587	1806	626	400	1645	1595	1701	3068	748	1426	842
ENSMUSG00000002365	ENSMUST00000002436;ENSMUST00000231803	66616	Snx9	sorting nexin 9 [Source:MGI Symbol;Acc:MGI:1913866]	17	5891604	5982229	90626	+	1310	1528	1207	1305	1167	873	1312	1715	1309	773	1287	1176	1135	1507	728	1496	849
ENSMUSG00000002372	ENSMUST00000002445;ENSMUST00000232922;ENSMUST00000232975;ENSMUST00000233029;ENSMUST00000233305;ENSMUST00000233319;ENSMUST00000233617;ENSMUST00000233727	71810	Ranbp3	RAN binding protein 3 [Source:MGI Symbol;Acc:MGI:1919060]	17	56980294	57018764	38471	+	673	637	713	528	531	270	823	957	495	273	673	798	622	888	281	672	351
ENSMUSG00000002379	ENSMUST00000002452;ENSMUST00000233233;ENSMUST00000233457;ENSMUST00000233832	69875	Ndufa11	NADH:ubiquinone oxidoreductase subunit A11 [Source:MGI Symbol;Acc:MGI:1917125]	17	57024767	57029141	4375	+	1041	1293	1018	1707	1619	2215	1145	1266	3841	2413	1160	1129	1022	1447	964	996	1186
ENSMUSG00000002393	ENSMUST00000002466;ENSMUST00000124732;ENSMUST00000127443;ENSMUST00000132630;ENSMUST00000137058;ENSMUST00000137734;ENSMUST00000155463;ENSMUST00000156270	13864	Nr2f6	nuclear receptor subfamily 2, group F, member 6 [Source:MGI Symbol;Acc:MGI:1352453]	8	71826767	71834604	7838	-	1920	1821	2074	2119	1821	1252	1959	1891	1521	1257	1736	2349	1843	2711	760	1036	939
ENSMUSG00000002395	ENSMUST00000019169;ENSMUST00000110053;ENSMUST00000110054;ENSMUST00000127517;ENSMUST00000136368;ENSMUST00000137137;ENSMUST00000139541;ENSMUST00000140236;ENSMUST00000142685;ENSMUST00000143657;ENSMUST00000146221;ENSMUST00000154550	67023	Use1	unconventional SNARE in the ER 1 homolog (S. cerevisiae) [Source:MGI Symbol;Acc:MGI:1914273]	8	71819492	71822376	2885	+	698	894	813	1189	904	1540	891	913	2330	1615	828	776	593	903	658	673	723
ENSMUSG00000002396	ENSMUST00000002469;ENSMUST00000110051;ENSMUST00000110052;ENSMUST00000126049	77090	Ocel1	occludin/ELL domain containing 1 [Source:MGI Symbol;Acc:MGI:1924340]	8	71823942	71832005	8064	+	174	162	150	194	162	150	125	135	192	108	117	160	115	204	79	99	100
ENSMUSG00000002409	ENSMUST00000085901;ENSMUST00000172467;ENSMUST00000172761	13549	Dyrk1b	dual-specificity tyrosine phosphorylation regulated kinase 1b [Source:MGI Symbol;Acc:MGI:1330302]	7	27878894	27886719	7826	+	330	234	232	191	239	75.04	281	358	106	54	263	166.94	225	302	86	187	113
ENSMUSG00000002413	ENSMUST00000002487;ENSMUST00000101497;ENSMUST00000167073;ENSMUST00000167169;ENSMUST00000169647	109880	Braf	Braf transforming gene [Source:MGI Symbol;Acc:MGI:88190]	6	39580171	39702397	122227	-	531	418	413	325	320	160	414	584	212	144	355	461	424	561	189	577	299
ENSMUSG00000002416	ENSMUST00000002490;ENSMUST00000119379;ENSMUST00000128064;ENSMUST00000135239;ENSMUST00000135671;ENSMUST00000146793	68198	Ndufb2	NADH:ubiquinone oxidoreductase subunit B2 [Source:MGI Symbol;Acc:MGI:1915448]	6	39569508	39580316	10809	+	972	986	936	1467	1271	2235	842	790	3111	2525	833	816	831	972	765	524	974
ENSMUSG00000002428	ENSMUST00000002502;ENSMUST00000128127;ENSMUST00000143005;ENSMUST00000145853;ENSMUST00000154233;ENSMUST00000155635	20585	Hltf	helicase-like transcription factor [Source:MGI Symbol;Acc:MGI:1196437]	3	20111975	20172654	60680	+	244	280	254	377	293	325	402	466	572	394	321	367	272	312	204	386	202
ENSMUSG00000002455	ENSMUST00000002529;ENSMUST00000132714;ENSMUST00000136481;ENSMUST00000139955	68879	Prpf6	pre-mRNA splicing factor 6 [Source:MGI Symbol;Acc:MGI:1922946]	2	181233661	181297453	63793	+	1725	1130	1293	1150	1008	647	1233	1295	800	538	1201	1635	943	1341	535	1401	558
ENSMUSG00000002458	ENSMUST00000002532;ENSMUST00000108769;ENSMUST00000108771;ENSMUST00000108772;ENSMUST00000108776;ENSMUST00000108778;ENSMUST00000108779;ENSMUST00000124776;ENSMUST00000130712;ENSMUST00000143510;ENSMUST00000144476;ENSMUST00000165416	56470	Rgs19	regulator of G-protein signaling 19 [Source:MGI Symbol;Acc:MGI:1915153]	2	181330212	181335770	5559	-	23	18	20	33	36	40	118	118	124	62	42	26	8	22	18	16	16
ENSMUSG00000002475	ENSMUST00000002549;ENSMUST00000117726;ENSMUST00000117828;ENSMUST00000144150;ENSMUST00000234419	106861	Abhd3	abhydrolase domain containing 3 [Source:MGI Symbol;Acc:MGI:2147183]	18	10642092	10706771	64680	-	1439	1515	1395	1736	1694	1399	1147	1193	2035	1203	1054	1341	1304	1785	1059	1293	1155
ENSMUSG00000002477	ENSMUST00000002551;ENSMUST00000234077;ENSMUST00000234207;ENSMUST00000234728;ENSMUST00000235020	20641	Snrpd1	small nuclear ribonucleoprotein D1 [Source:MGI Symbol;Acc:MGI:98344]	18	10617775	10642079	24305	+	236	304	228	418	328	527	417	530	1240	683	318	314	245	287	156	237	170
ENSMUSG00000002486	ENSMUST00000094441;ENSMUST00000112199;ENSMUST00000124242;ENSMUST00000128625;ENSMUST00000131679;ENSMUST00000152999;ENSMUST00000202105;ENSMUST00000202252	77832	Tchp	trichoplein, keratin filament binding [Source:MGI Symbol;Acc:MGI:1925082]	5	114845821	114860388	14568	+	35	35	38	41	31	20	64	53	21	12	58	76	46	75	12	40	16
ENSMUSG00000002489	ENSMUST00000002588;ENSMUST00000089084;ENSMUST00000114122;ENSMUST00000114124;ENSMUST00000124433;ENSMUST00000130951;ENSMUST00000134021;ENSMUST00000136760;ENSMUST00000139544;ENSMUST00000144691;ENSMUST00000151655;ENSMUST00000155915;ENSMUST00000163370;ENSMUST00000164263;ENSMUST00000178095	21844	Tiam1	T cell lymphoma invasion and metastasis 1 [Source:MGI Symbol;Acc:MGI:103306]	16	89583999	89940657	356659	-	22	22	27	17	20	18	46	44	15	7	34	41	18	31	4	16	7
ENSMUSG00000002496	ENSMUST00000097373;ENSMUST00000226242;ENSMUST00000226284;ENSMUST00000226309;ENSMUST00000226398;ENSMUST00000226428;ENSMUST00000226473;ENSMUST00000226691;ENSMUST00000226985;ENSMUST00000227094;ENSMUST00000227330;ENSMUST00000227432;ENSMUST00000227509;ENSMUST00000227543;ENSMUST00000227607;ENSMUST00000227658;ENSMUST00000227745;ENSMUST00000227754;ENSMUST00000227804;ENSMUST00000228220;ENSMUST00000228412;…	22084	Tsc2	TSC complex subunit 2 [Source:MGI Symbol;Acc:MGI:102548]	17	24814790	24851604	36815	-	969	897	1049	585	589	244	1114	1252	392	212	953	1116	994	1397	241	1059	478
ENSMUSG00000002504	ENSMUST00000002572;ENSMUST00000019684;ENSMUST00000234121;ENSMUST00000234505;ENSMUST00000234557;ENSMUST00000234912;ENSMUST00000235042	65962	Nherf2	NHERF family PDZ scaffold protein 2 [Source:MGI Symbol;Acc:MGI:1890662]	17	24858260	24869301	11042	-	351	295	411	351	285	214	358	459	216	193	380	402	324	415	158	298	192
ENSMUSG00000002524	ENSMUST00000002599;ENSMUST00000100527;ENSMUST00000227251;ENSMUST00000227316;ENSMUST00000228459;ENSMUST00000229030;ENSMUST00000229474;ENSMUST00000229496;ENSMUST00000230143;ENSMUST00000230924;ENSMUST00000230968	67959	Puf60	poly-U binding splicing factor 60 [Source:MGI Symbol;Acc:MGI:1915209]	15	75942031	75952773	10743	-	1449	1514	1440	1718	1347	1522	1645	1907	2255	1558	1343	1699	1288	1827	957	1258	1026
ENSMUSG00000002546	ENSMUST00000081670;ENSMUST00000100194;ENSMUST00000113377;ENSMUST00000126276;ENSMUST00000127276;ENSMUST00000129193;ENSMUST00000131712;ENSMUST00000139494;ENSMUST00000146544;ENSMUST00000147707;ENSMUST00000149141;ENSMUST00000239447;ENSMUST00000239474	99412	Golga2	golgin A2 [Source:MGI Symbol;Acc:MGI:2139395]	2	32177396	32197933	20538	+	789	755	850	601	614	364	990	1163	530	367	923	1244	849	1039	327	686	361
ENSMUSG00000002550	ENSMUST00000002625;ENSMUST00000133804;ENSMUST00000134351;ENSMUST00000138133;ENSMUST00000142797	22245	Uck1	uridine-cytidine kinase 1 [Source:MGI Symbol;Acc:MGI:98904]	2	32145014	32150171	5158	-	626	675	536	1033	945.08	686	642	655	896	488	560.99	732	767.99	1030.99	408	506.99	491.36
ENSMUSG00000002578	ENSMUST00000133342;ENSMUST00000221022;ENSMUST00000221150;ENSMUST00000222067;ENSMUST00000222899;ENSMUST00000222901;ENSMUST00000223145;ENSMUST00000223162;ENSMUST00000238610;ENSMUST00000238712	22781	Ikzf4	IKAROS family zinc finger 4 [Source:MGI Symbol;Acc:MGI:1343139]	10	128466712	128505227	38516	-	10	9	7	11	6	4	51	30	18	2	15	36	23	31	5	33	4
ENSMUSG00000002580	ENSMUST00000002655	103742	Mien1	migration and invasion enhancer 1 [Source:MGI Symbol;Acc:MGI:1913678]	11	98328534	98329817	1284	-	870	1057	968	1314	1164	1839	973	887	2546	1792	806	911	722	1005	688	557	862
ENSMUSG00000002588	ENSMUST00000002663;ENSMUST00000176933;ENSMUST00000176945;ENSMUST00000177159	18979	Pon1	paraoxonase 1 [Source:MGI Symbol;Acc:MGI:103295]	6	5168090	5193946	25857	-	16649	20028	12680	17835	15595	16460	7968	14996	18103	11082	6990	13630	17716	20542	12897	17092	13407
ENSMUSG00000002602	ENSMUST00000002677;ENSMUST00000085948;ENSMUST00000124442;ENSMUST00000132038;ENSMUST00000132989;ENSMUST00000137211;ENSMUST00000137383;ENSMUST00000147680	26362	Axl	AXL receptor tyrosine kinase [Source:MGI Symbol;Acc:MGI:1347244]	7	25456698	25488130	31433	-	266	281	341	416	369	311	1287	1373	616	358	738	294	200	283	109	178	128
ENSMUSG00000002603	ENSMUST00000002678;ENSMUST00000169009;ENSMUST00000171757;ENSMUST00000206348;ENSMUST00000206584	21803	Tgfb1	transforming growth factor, beta 1 [Source:MGI Symbol;Acc:MGI:98725]	7	25386427	25404502	18076	+	132	127	158	154	147	76	584	605	241	121	352	163	70	161	41	78	43
ENSMUSG00000002608	ENSMUST00000002683;ENSMUST00000125699;ENSMUST00000129429;ENSMUST00000129519;ENSMUST00000134201;ENSMUST00000137046;ENSMUST00000140847;ENSMUST00000154143;ENSMUST00000156365	52132	Ccdc97	coiled-coil domain containing 97 [Source:MGI Symbol;Acc:MGI:1196455]	7	25410531	25418513	7983	-	527	390	494	311	285	99	625	578	185	111	449	627	458	640	107	355	170
ENSMUSG00000002617	ENSMUST00000037057;ENSMUST00000135840;ENSMUST00000140313;ENSMUST00000142999;ENSMUST00000151447;ENSMUST00000172177	22700	Zfp40	zinc finger protein 40 [Source:MGI Symbol;Acc:MGI:99185]	17	23392843	23412226	19384	-	31	35	35	61	56	48	71	89	150	82	54	46	59	62	30	72	64
ENSMUSG00000002625	ENSMUST00000050214;ENSMUST00000235265;ENSMUST00000235387;ENSMUST00000235614;ENSMUST00000235724;ENSMUST00000236039;ENSMUST00000236105;ENSMUST00000236494;ENSMUST00000236503;ENSMUST00000236618;ENSMUST00000236765;ENSMUST00000237879;ENSMUST00000237936	54194	Akap8l	A kinase anchor protein 8-like [Source:MGI Symbol;Acc:MGI:1860606]	17	32540398	32569581	29184	-	814	810	697	684	627	345	848	1096	686	377	639	860	668	981	428	612	459
ENSMUSG00000002635	ENSMUST00000002710;ENSMUST00000125803;ENSMUST00000148381;ENSMUST00000206088	68079	Pdcd2l	programmed cell death 2-like [Source:MGI Symbol;Acc:MGI:1915329]	7	33883924	33896086	12163	-	173	231	194	294	266	332	181	201	500	377	172	154	183	197	211	174	184
ENSMUSG00000002658	ENSMUST00000002733	98053	Gtf2f1	general transcription factor IIF, polypeptide 1 [Source:MGI Symbol;Acc:MGI:1923848]	17	57310405	57318288	7884	-	344	358	377	357	277	184	511	543	343	207	375	587	421	451	146	340	175
ENSMUSG00000002660	ENSMUST00000002735;ENSMUST00000233845	53895	Clpp	caseinolytic mitochondrial matrix peptidase proteolytic subunit [Source:MGI Symbol;Acc:MGI:1858213]	17	57297305	57303188	5884	+	902	1032	919	1051	1015	754	840	893	1162	750	753	966	809	1017	517	690	526
ENSMUSG00000002661	ENSMUST00000002737;ENSMUST00000074141;ENSMUST00000149632	66400	Alkbh7	alkB homolog 7 [Source:MGI Symbol;Acc:MGI:1913650]	17	57304339	57306322	1984	+	229	268	264	367	288	466	162	189	521	358	167	248	217	294	157	116	189
ENSMUSG00000002668	ENSMUST00000011623;ENSMUST00000232685;ENSMUST00000232938;ENSMUST00000233234;ENSMUST00000233564;ENSMUST00000233650;ENSMUST00000233674	70785	Dennd1c	DENN domain containing 1C [Source:MGI Symbol;Acc:MGI:1918035]	17	57372905	57385514	12610	-	16	24	24	16	25	10	65	59	21	18	40	26	17	20	4	10	12
ENSMUSG00000002679	ENSMUST00000002756;ENSMUST00000159187;ENSMUST00000160739;ENSMUST00000161211;ENSMUST00000161598;ENSMUST00000161902	69792	Med6	mediator complex subunit 6 [Source:MGI Symbol;Acc:MGI:1917042]	12	81620331	81641782	21452	-	176	219	199	329	250	396	207	242	688	489	167	228	154	211	174	221	216
ENSMUSG00000002699	ENSMUST00000052413;ENSMUST00000109329;ENSMUST00000133120;ENSMUST00000146318	16822	Lcp2	lymphocyte cytosolic protein 2 [Source:MGI Symbol;Acc:MGI:1321402]	11	33996920	34042295	45376	+	60	66	75	94	98	136	352	354	382	186	158	63	38	50	27	39	27
ENSMUSG00000002718	ENSMUST00000002790;ENSMUST00000129061;ENSMUST00000132402;ENSMUST00000135139;ENSMUST00000145819;ENSMUST00000163437;ENSMUST00000163917;ENSMUST00000164974;ENSMUST00000166871;ENSMUST00000168599;ENSMUST00000169290;ENSMUST00000171410	110750	Cse1l	chromosome segregation 1 like [Source:MGI Symbol;Acc:MGI:1339951]	2	166747960	166788309	40350	+	729	744	577	859	763	676	813	1138	1446	879	704	880	722	897	535	1083	590
ENSMUSG00000002728	ENSMUST00000002805;ENSMUST00000110000;ENSMUST00000129502;ENSMUST00000134759;ENSMUST00000136330;ENSMUST00000149461;ENSMUST00000150316;ENSMUST00000165635;ENSMUST00000169732	67877	Naa20	N(alpha)-acetyltransferase 20, NatB catalytic subunit [Source:MGI Symbol;Acc:MGI:1915127]	2	145744019	145758345	14327	+	233	276.88	255	423	349	537	340	375	1002	709	339	292	249	331.92	273	416	350
ENSMUSG00000002731	ENSMUST00000002808;ENSMUST00000140493	23992	Prkra	protein kinase, interferon inducible double stranded RNA dependent activator [Source:MGI Symbol;Acc:MGI:1344375]	2	76460242	76478359	18118	-	400	386	394	494	504	566	426	413	861	572	340	350	282	373	318	417	330
ENSMUSG00000002732	ENSMUST00000002809;ENSMUST00000147355;ENSMUST00000154097;ENSMUST00000176815	14231	Fkbp7	FK506 binding protein 7 [Source:MGI Symbol;Acc:MGI:1336879]	2	76493388	76503460	10073	-	42	34	32	72	82	79	75	70	156	94	58	32	29	37	29	57	35
ENSMUSG00000002733	ENSMUST00000111920;ENSMUST00000125119	83435	Plekha3	pleckstrin homology domain-containing, family A (phosphoinositide binding specific) member 3 [Source:MGI Symbol;Acc:MGI:1932515]	2	76505625	76527172	21548	+	510	550	447	506	475	324	489	577	599	373	450	559	478	568	255	652	372
ENSMUSG00000002741	ENSMUST00000002818;ENSMUST00000143834	56418	Ykt6	YKT6 v-SNARE homolog (S. cerevisiae) [Source:MGI Symbol;Acc:MGI:1927550]	11	5905693	5917780	12088	+	1488	1334	1266	1652	1526	1432	1570	1651	2140	1520	1253	1664	1343	1765	905	1302	986
ENSMUSG00000002748	ENSMUST00000002825;ENSMUST00000136947;ENSMUST00000142307;ENSMUST00000176793;ENSMUST00000201894	22385	Baz1b	bromodomain adjacent to zinc finger domain, 1B [Source:MGI Symbol;Acc:MGI:1353499]	5	135216118	135274983	58866	+	1216	1117	1279	1038	971	634	1808	1826	999	604	1576	1474	895	1192	558	1735	739
ENSMUSG00000002763	ENSMUST00000002840;ENSMUST00000127897;ENSMUST00000144964;ENSMUST00000148872	224824	Pex6	peroxisomal biogenesis factor 6 [Source:MGI Symbol;Acc:MGI:2385054]	17	47022389	47036467	14079	+	2316	2304	1975	1608	1313	760	1671	2183	823	613	1590	2311	1967	2769	797	1607	1047
ENSMUSG00000002767	ENSMUST00000002844;ENSMUST00000113429;ENSMUST00000113430;ENSMUST00000146183;ENSMUST00000156464	27398	Mrpl2	mitochondrial ribosomal protein L2 [Source:MGI Symbol;Acc:MGI:1351622]	17	46957155	46961065	3911	+	950	1213	849	1266	1038	1185	841	999	1747	1228	901	907	799	1077	674	634	701
ENSMUSG00000002768	ENSMUST00000002845;ENSMUST00000232732;ENSMUST00000232762;ENSMUST00000233032;ENSMUST00000233385;ENSMUST00000233430;ENSMUST00000233491;ENSMUST00000233612;ENSMUST00000233644	17256	Mea1	male enhanced antigen 1 [Source:MGI Symbol;Acc:MGI:96957]	17	46989719	46994037	4319	+	811	879	852	1117	946	1381	841	770	2354	1700	789	829	650	910	636	375	631
ENSMUSG00000002769	ENSMUST00000002846;ENSMUST00000147112;ENSMUST00000233086	14711	Gnmt	glycine N-methyltransferase [Source:MGI Symbol;Acc:MGI:1202304]	17	47036590	47040094	3505	-	39865	50354	55332	68120	59955	62816	39844	43073	95322	83010	37684	24443	27219	36894	29569	27924	23676
ENSMUSG00000002778	ENSMUST00000002855;ENSMUST00000211152;ENSMUST00000211234;ENSMUST00000211495;ENSMUST00000211716	68137	Kdelr1	KDEL (Lys-Asp-Glu-Leu) endoplasmic reticulum protein retention receptor 1 [Source:MGI Symbol;Acc:MGI:1915387]	7	45522196	45533156	10961	+	1830	1981	1799	1652	1596	1175	2207	1971	1636	1133	2088	1946	1572	2004	871	1448	1015
ENSMUSG00000002781	ENSMUST00000069772;ENSMUST00000209292;ENSMUST00000209350;ENSMUST00000209395;ENSMUST00000209580;ENSMUST00000210044;ENSMUST00000210503;ENSMUST00000210574;ENSMUST00000210692;ENSMUST00000211280	70209	Tmem143	transmembrane protein 143 [Source:MGI Symbol;Acc:MGI:1917459]	7	45546365	45566837	20473	+	487	529	500	411	427	274	512	546	427	315	553	422	469	574	215	353	280
ENSMUSG00000002797	ENSMUST00000002874;ENSMUST00000131475;ENSMUST00000136527;ENSMUST00000203208;ENSMUST00000204301;ENSMUST00000204770	110175	Ggct	gamma-glutamyl cyclotransferase [Source:MGI Symbol;Acc:MGI:95700]	6	54959565	54969935	10371	-	135	160	132	207	163	164	142	159	238	172	150	203	144	160	96	154	90
ENSMUSG00000002799	ENSMUST00000075827;ENSMUST00000220771;ENSMUST00000220855;ENSMUST00000221320;ENSMUST00000221454;ENSMUST00000221647;ENSMUST00000221696;ENSMUST00000222402;ENSMUST00000223140;ENSMUST00000223304	16450	Jag2	jagged 2 [Source:MGI Symbol;Acc:MGI:1098270]	12	112871439	112893396	21958	-	3	1	12	6	1	3	26	6	3	2	12	4	2	3	2	1	0
ENSMUSG00000002803	ENSMUST00000002880;ENSMUST00000165079;ENSMUST00000220567;ENSMUST00000221104;ENSMUST00000221500;ENSMUST00000222209;ENSMUST00000223287;ENSMUST00000223368;ENSMUST00000223508	399566	Btbd6	BTB domain containing 6 [Source:MGI Symbol;Acc:MGI:3026623]	12	112940102	112942565	2464	+	240	271	250	203	198	119	299	375	206	127	279	260	217	293	120	209	144
ENSMUSG00000002804	ENSMUST00000002881;ENSMUST00000221397;ENSMUST00000221497;ENSMUST00000222793;ENSMUST00000222932	66174	Nudt14	nudix hydrolase 14 [Source:MGI Symbol;Acc:MGI:1913424]	12	112897911	112905744	7834	-	168	217	165	283	269	376	220	257	643	411	232	179	151	219	173	143	186
ENSMUSG00000002808	ENSMUST00000002885;ENSMUST00000220755;ENSMUST00000220944;ENSMUST00000221014	105298	Epdr1	ependymin related 1 [Source:MGI Symbol;Acc:MGI:2145369]	13	19775876	19804097	28222	-	7	3	20	14	12	11	50	29	15	43	81	16	7	8	7	22	9
ENSMUSG00000002812	ENSMUST00000002889;ENSMUST00000137226;ENSMUST00000154141;ENSMUST00000154465	14248	Flii	flightless I actin binding protein [Source:MGI Symbol;Acc:MGI:1342286]	11	60604949	60618089	13141	-	1311	1258	1142	1025	982	468	1559	1802	894	414	1336	1160	1033	1391	456	1181	620
ENSMUSG00000002814	ENSMUST00000002891;ENSMUST00000102668;ENSMUST00000117743;ENSMUST00000120417;ENSMUST00000124799;ENSMUST00000130068	21975	Top3a	topoisomerase (DNA) III alpha [Source:MGI Symbol;Acc:MGI:1197527]	11	60630884	60668191	37308	-	153	138	130	149	157	88	172	241	166	50	131	140	128	168	85	150	104
ENSMUSG00000002820	ENSMUST00000065005;ENSMUST00000215767;ENSMUST00000216826;ENSMUST00000217269;ENSMUST00000217591	235040	Atg4d	autophagy related 4D, cysteine peptidase [Source:MGI Symbol;Acc:MGI:2444308]	9	21176589	21189068	12480	+	592	656	595	871	706	748	616	738	1047	823	655	542	447	650	403	440	545
ENSMUSG00000002825	ENSMUST00000002902;ENSMUST00000213718;ENSMUST00000213967;ENSMUST00000214101;ENSMUST00000214128;ENSMUST00000214681;ENSMUST00000214900;ENSMUST00000216277;ENSMUST00000216527;ENSMUST00000217060;ENSMUST00000217188	60507	Qtrt1	queuine tRNA-ribosyltransferase catalytic subunit 1 [Source:MGI Symbol;Acc:MGI:1931441]	9	21323133	21331570	8438	+	64	61	67	66	43	55	78	55	84	59	58	73	47	67	23	48	39
ENSMUSG00000002831	ENSMUST00000190703;ENSMUST00000238734	57435	Plin4	perilipin 4 [Source:MGI Symbol;Acc:MGI:1929709]	17	56407591	56416803	9213	-	65	73	686	68	112	20	237	71	97	75	477	63	44	56	10	96	16
ENSMUSG00000002833	ENSMUST00000002911;ENSMUST00000224078;ENSMUST00000224101;ENSMUST00000224172;ENSMUST00000224655;ENSMUST00000224701;ENSMUST00000225208;ENSMUST00000225342;ENSMUST00000225731;ENSMUST00000225843;ENSMUST00000226035;ENSMUST00000226053	15193	Hdgfl2	HDGF like 2 [Source:MGI Symbol;Acc:MGI:1194492]	17	56386634	56407607	20974	+	616	620	637	627	490	325	839	929	614	328	685	801	601	813	294	468	349
ENSMUSG00000002835	ENSMUST00000002914;ENSMUST00000232828;ENSMUST00000233325	27221	Chaf1a	chromatin assembly factor 1, subunit A [Source:MGI Symbol;Acc:MGI:1351331]	17	56347439	56379289	31851	+	56	24	40	22	54	26	195	303	98	49	176	23	27	27	15	29	17
ENSMUSG00000002844	ENSMUST00000002923;ENSMUST00000232145	11544	Adprh	ADP-ribosylarginine hydrolase [Source:MGI Symbol;Acc:MGI:1098234]	16	38264392	38273065	8674	-	139	131	128	146	124	133	192	240	221	136	169	218	190	238	59	86	74
ENSMUSG00000002845	ENSMUST00000002924;ENSMUST00000163133;ENSMUST00000163549;ENSMUST00000163884;ENSMUST00000163948;ENSMUST00000165140;ENSMUST00000165631;ENSMUST00000166235;ENSMUST00000166854;ENSMUST00000167033;ENSMUST00000169554;ENSMUST00000170097;ENSMUST00000171064;ENSMUST00000171687	67846	Tmem39a	transmembrane protein 39a [Source:MGI Symbol;Acc:MGI:1915096]	16	38379060	38412524	33465	+	154	157	194	155	124	131	293	232	214	187	279	568	312	357	94	246	137
ENSMUSG00000002846	ENSMUST00000002925;ENSMUST00000147543	76916	Timmdc1	translocase of inner mitochondrial membrane domain containing 1 [Source:MGI Symbol;Acc:MGI:1922139]	16	38318709	38343025	24317	-	600	645	620	721	561	601	497	613	818	532	468	615	484	676	438	407	474
ENSMUSG00000002847	ENSMUST00000002926;ENSMUST00000232224	85031	Pla1a	phospholipase A1 member A [Source:MGI Symbol;Acc:MGI:1934677]	16	38216479	38253507	37029	-	1387	1404	1407	1407	1326	1228	1684	1917	2336	1344	1615	1354	1055	1424	783	1201	1078
ENSMUSG00000002870	ENSMUST00000058011;ENSMUST00000203172;ENSMUST00000203935;ENSMUST00000204217;ENSMUST00000204365;ENSMUST00000204393;ENSMUST00000205165	17216	Mcm2	minichromosome maintenance complex component 2 [Source:MGI Symbol;Acc:MGI:105380]	6	88860456	88875762	15307	-	39	58	67	69	85	54	299	432	173	80	247	64	37	61	10	33	20
ENSMUSG00000002871	ENSMUST00000055022;ENSMUST00000123257;ENSMUST00000128171;ENSMUST00000128790;ENSMUST00000129979;ENSMUST00000135778;ENSMUST00000138415;ENSMUST00000141163;ENSMUST00000144405;ENSMUST00000148874;ENSMUST00000150236;ENSMUST00000151379;ENSMUST00000152045;ENSMUST00000152585;ENSMUST00000153874;ENSMUST00000153885;ENSMUST00000203155;ENSMUST00000203185;ENSMUST00000203345;ENSMUST00000203648;ENSMUST00000203694;…	24100	Tpra1	transmembrane protein, adipocyte asscociated 1 [Source:MGI Symbol;Acc:MGI:1345190]	6	88879233	88889220	9988	+	303	321	365	275	264	145	459	412	216	126	406	413	325	393	120	223	166
ENSMUSG00000002881	ENSMUST00000069792;ENSMUST00000167732;ENSMUST00000168082;ENSMUST00000170269;ENSMUST00000186764	17936	Nab1	Ngfi-A binding protein 1 [Source:MGI Symbol;Acc:MGI:107564]	1	52496453	52539838	43386	-	1949	2125	2112	2049	1956	1968	2324	2760	3570	2760	2030	2092	1653	2109	1505	2554	1901
ENSMUSG00000002885	ENSMUST00000002964;ENSMUST00000075843;ENSMUST00000109802;ENSMUST00000139797;ENSMUST00000140606;ENSMUST00000149368;ENSMUST00000154075;ENSMUST00000166939	26364	Adgre5	adhesion G protein-coupled receptor E5 [Source:MGI Symbol;Acc:MGI:1347095]	8	84449880	84467955	18076	-	228	238	223	282	260	272	718	895	535	300	478	283	167	289	98	179	119
ENSMUSG00000002897	ENSMUST00000002976;ENSMUST00000204078;ENSMUST00000204239	16172	Il17ra	interleukin 17 receptor A [Source:MGI Symbol;Acc:MGI:107399]	6	120440208	120464520	24313	+	468	359	491	324	353	204	830	676	466	207	487	473	353	497	201	369	197
ENSMUSG00000002900	ENSMUST00000002979;ENSMUST00000164009;ENSMUST00000164228;ENSMUST00000169065;ENSMUST00000169088;ENSMUST00000170495;ENSMUST00000172134;ENSMUST00000239496	16777	Lamb1	laminin B1 [Source:MGI Symbol;Acc:MGI:96743]	12	31315233	31379643	64411	+	84	128	110	127	110	69	112	170	100	70	174	117	117	171	44	160	60
ENSMUSG00000002908	ENSMUST00000110078;ENSMUST00000212084;ENSMUST00000212086;ENSMUST00000212243;ENSMUST00000212414;ENSMUST00000212509;ENSMUST00000212611	84036	Kcnn1	potassium intermediate/small conductance calcium-activated channel, subfamily N, member 1 [Source:MGI Symbol;Acc:MGI:1933993]	8	71294693	71315902	21210	-	86	122	85	72	49	40	65	84	38	24	66	86	90	136	36	88	61
ENSMUSG00000002910	ENSMUST00000002989;ENSMUST00000212405;ENSMUST00000212508;ENSMUST00000212770;ENSMUST00000212855;ENSMUST00000212898;ENSMUST00000213095	70807	Arrdc2	arrestin domain containing 2 [Source:MGI Symbol;Acc:MGI:1918057]	8	71287773	71292364	4592	-	182	190	162	88	88	70	161	158	107	41	147	150	159	224	53	120	129
ENSMUSG00000002944	ENSMUST00000082367;ENSMUST00000165232;ENSMUST00000169095;ENSMUST00000170051;ENSMUST00000197574;ENSMUST00000197890	12491	Cd36	CD36 molecule [Source:MGI Symbol;Acc:MGI:107899]	5	17986688	18093799	107112	-	287	420	1144	1505	2530	1387	5422	3544	8089	5919	4194	620	1024	1172	872	1043	546
ENSMUSG00000002948	ENSMUST00000003027;ENSMUST00000062686;ENSMUST00000110994;ENSMUST00000110995;ENSMUST00000110996;ENSMUST00000110998;ENSMUST00000110999;ENSMUST00000129537;ENSMUST00000129866;ENSMUST00000207247	26400	Map2k7	mitogen-activated protein kinase kinase 7 [Source:MGI Symbol;Acc:MGI:1346871]	8	4288740	4297897	9158	+	789.74	764.47	746.04	591.42	608.48	323.04	911.4	941.55	500.21	306.6	751.23	860.03	684.96	939.93	319.41	737.89	400.48
ENSMUSG00000002949	ENSMUST00000003029;ENSMUST00000135755;ENSMUST00000141195;ENSMUST00000147831;ENSMUST00000148672;ENSMUST00000149827;ENSMUST00000160371;ENSMUST00000160549;ENSMUST00000161143	21856	Timm44	translocase of inner mitochondrial membrane 44 [Source:MGI Symbol;Acc:MGI:1343262]	8	4309731	4325913	16183	-	977	1090	935	1059	921	739	997	1187	1140	826	952	889	741	993	515	939	542
ENSMUSG00000002957	ENSMUST00000003038;ENSMUST00000201261;ENSMUST00000201320	11772	Ap2a2	adaptor-related protein complex 2, alpha 2 subunit [Source:MGI Symbol;Acc:MGI:101920]	7	141142086	141212924	70839	+	2054	1924	2021	1740	1596	1132	2632	2970	1731	1015	1912	3189	2502	3484	674	1562	956
ENSMUSG00000002963	ENSMUST00000003044;ENSMUST00000098478;ENSMUST00000107876;ENSMUST00000123015;ENSMUST00000124168;ENSMUST00000126860;ENSMUST00000139003;ENSMUST00000144669;ENSMUST00000145850;ENSMUST00000152747;ENSMUST00000154968;ENSMUST00000155050;ENSMUST00000200892;ENSMUST00000201882;ENSMUST00000202646;ENSMUST00000208385;ENSMUST00000208666	59047	Pnkp	polynucleotide kinase 3'- phosphatase [Source:MGI Symbol;Acc:MGI:1891698]	7	44506563	44512416	5854	+	477	517	470	574	483	457	480	528	610	402	346	659	534	720	253	313	296
ENSMUSG00000002968	ENSMUST00000003049;ENSMUST00000123130;ENSMUST00000207196;ENSMUST00000207206;ENSMUST00000207278;ENSMUST00000207490;ENSMUST00000207654;ENSMUST00000207788;ENSMUST00000207848;ENSMUST00000208253;ENSMUST00000208551;ENSMUST00000208552;ENSMUST00000208556;ENSMUST00000209191	75613	Med25	mediator complex subunit 25 [Source:MGI Symbol;Acc:MGI:1922863]	7	44526189	44542136	15948	-	848	776	761	516	500	173	973	921	291	146	815	829	644	964	203	616	373
ENSMUSG00000002980	ENSMUST00000003061;ENSMUST00000133271;ENSMUST00000133427;ENSMUST00000135632;ENSMUST00000155244	57278	Bcam	basal cell adhesion molecule [Source:MGI Symbol;Acc:MGI:1929940]	7	19490056	19504941	14886	-	66	64	65	101	118	35	180	168	91	57	207	87	83	83	17	38	25
ENSMUSG00000002981	ENSMUST00000055242;ENSMUST00000207704;ENSMUST00000208174;ENSMUST00000208215;ENSMUST00000208554;ENSMUST00000208594;ENSMUST00000208599;ENSMUST00000208846;ENSMUST00000208868	56457	Clptm1	cleft lip and palate associated transmembrane protein 1 [Source:MGI Symbol;Acc:MGI:1927155]	7	19365496	19398958	33463	-	2313	2351	2385	1854	1732	977	2335	2690	1488	951	2379	2595	2123	2807	1051	2014	1408
ENSMUSG00000002983	ENSMUST00000049912;ENSMUST00000094762;ENSMUST00000130543;ENSMUST00000131759;ENSMUST00000137615;ENSMUST00000141586;ENSMUST00000148040;ENSMUST00000153309;ENSMUST00000208087	19698	Relb	avian reticuloendotheliosis viral (v-rel) oncogene related B [Source:MGI Symbol;Acc:MGI:103289]	7	19340142	19363363	23222	-	32	22	24	26	39	26	106	74	55	34	68	33	26	26	18	18	20
ENSMUSG00000002984	ENSMUST00000032555;ENSMUST00000093552;ENSMUST00000172705;ENSMUST00000173966;ENSMUST00000174476;ENSMUST00000208286	53333	Tomm40	translocase of outer mitochondrial membrane 40 [Source:MGI Symbol;Acc:MGI:1858259]	7	19435238	19449363	14126	-	763	928	895	869	672	446	1013	1069	860	555	1068	965	718	961	407	855	593
ENSMUSG00000002985	ENSMUST00000003066;ENSMUST00000167646;ENSMUST00000172808;ENSMUST00000172983;ENSMUST00000173739;ENSMUST00000174064;ENSMUST00000174144;ENSMUST00000174191;ENSMUST00000174355;ENSMUST00000174710;ENSMUST00000207525	11816	Apoe	apolipoprotein E [Source:MGI Symbol;Acc:MGI:88057]	7	19430034	19433113	3080	-	406718	473915	391565	399206	378581	256459	353896	423275	342852	208091	323024	321149	291483	409174	181557	225021	192597
ENSMUSG00000002992	ENSMUST00000003074;ENSMUST00000134116;ENSMUST00000142352	11813	Apoc2	apolipoprotein C2 [Source:MGI Symbol;Acc:MGI:88054]	7	19405504	19411866	6363	-	3462.62	4540.25	4836.82	7393.43	8971.73	12775.5	13206.2	5012.3	26851.2	24611.3	15381.8	3979.67	2876.4	3932.71	3839.66	2536.91	4621.12
ENSMUSG00000002996	ENSMUST00000167458;ENSMUST00000172314;ENSMUST00000175666;ENSMUST00000175686;ENSMUST00000176084;ENSMUST00000176103;ENSMUST00000176138;ENSMUST00000176520;ENSMUST00000176643	73389	Hbp1	high mobility group box transcription factor 1 [Source:MGI Symbol;Acc:MGI:894659]	12	31976253	32000534	24282	-	2330	2596	1986	2359	2320	2094	2009	2892	2943	1870	1951	2017	1689	2545	1811	2590	1880
ENSMUSG00000002997	ENSMUST00000003079;ENSMUST00000036497;ENSMUST00000146865	19088	Prkar2b	protein kinase, cAMP dependent regulatory, type II beta [Source:MGI Symbol;Acc:MGI:97760]	12	32008475	32111295	102821	-	11	9	10	11	14	14	28	17	20	18	18	8	7	15	3	12	9
ENSMUSG00000003031	ENSMUST00000003115;ENSMUST00000067327;ENSMUST00000204807	12576	Cdkn1b	cyclin dependent kinase inhibitor 1B [Source:MGI Symbol;Acc:MGI:104565]	6	134897364	134902476	5113	+	435	599	503	624	494	541	590	699	916	626	539	597	483	500	351	467	376
ENSMUSG00000003032	ENSMUST00000107619;ENSMUST00000129250;ENSMUST00000132746	16600	Klf4	Kruppel-like transcription factor 4 (gut) [Source:MGI Symbol;Acc:MGI:1342287]	4	55527143	55532466	5324	-	16	28	28	20	19	20	48	36	20	14	28	32	15	20	3	22	8
ENSMUSG00000003033	ENSMUST00000003117;ENSMUST00000126885;ENSMUST00000145213;ENSMUST00000151546;ENSMUST00000156735;ENSMUST00000212708;ENSMUST00000212841;ENSMUST00000212940	11767	Ap1m1	adaptor-related protein complex AP-1, mu subunit 1 [Source:MGI Symbol;Acc:MGI:102776]	8	72993862	73011229	17368	+	454	560	444	565	444	337	620	673	615	359	542	579	481	658	260	481	282
ENSMUSG00000003037	ENSMUST00000003121;ENSMUST00000128203;ENSMUST00000135613	17274	Rab8a	RAB8A, member RAS oncogene family [Source:MGI Symbol;Acc:MGI:96960]	8	72915044	72937748	22705	+	1443	1624	1600	1689	1434	1152	1812	1909	1766	1293	1528	1726	1382	1862	794	1284	860
ENSMUSG00000003038	ENSMUST00000100472;ENSMUST00000102552;ENSMUST00000102553;ENSMUST00000105893;ENSMUST00000123234;ENSMUST00000125266;ENSMUST00000130809;ENSMUST00000136327;ENSMUST00000136859;ENSMUST00000137456;ENSMUST00000138458;ENSMUST00000145025;ENSMUST00000153622	15331	Hmgn2	high mobility group nucleosomal binding domain 2 [Source:MGI Symbol;Acc:MGI:96136]	4	133692049	133695961	3913	-	335.18	536.81	362.52	948.28	657.87	1044.32	1232.64	1678.82	3415.39	2146.94	1223.72	388.45	383.85	376.84	391.48	610.59	580.28
ENSMUSG00000003039	ENSMUST00000003123;ENSMUST00000212117	67922	Fam32a	family with sequence similarity 32, member A [Source:MGI Symbol;Acc:MGI:1915172]	8	72973574	72978262	4689	+	1089	1065	1235	1419	1190	1345	1211	1219	2333	1671	1143	978	830	1065	745	1072	788
ENSMUSG00000003051	ENSMUST00000003135;ENSMUST00000185752;ENSMUST00000188895	13710	Elf3	E74-like factor 3 [Source:MGI Symbol;Acc:MGI:1101781]	1	135181313	135186306	4994	-	8	4	8	3	6	10	54	24	11	3	16	33	25	12	3	5	5
ENSMUSG00000003053	ENSMUST00000003137;ENSMUST00000176624;ENSMUST00000177087	13095	Cyp2c29	cytochrome P450, family 2, subfamily c, polypeptide 29 [Source:MGI Symbol;Acc:MGI:103238]	19	39257849	39319157	61309	+	42070	55587	34375	21675	22847	16544	9946	19402	15554	10092	9934	29917	29447	39753	17687	37800	18568
ENSMUSG00000003062	ENSMUST00000039694;ENSMUST00000196268;ENSMUST00000196537;ENSMUST00000196712;ENSMUST00000197565;ENSMUST00000199278;ENSMUST00000199924;ENSMUST00000200323;ENSMUST00000221380;ENSMUST00000222869	76205	Stard3nl	STARD3 N-terminal like [Source:MGI Symbol;Acc:MGI:1923455]	13	19541846	19579965	38120	-	185	235	224	348	294	537	299	314	930	658	276	204	196	226	182	189	197
ENSMUSG00000003068	ENSMUST00000003152;ENSMUST00000105370;ENSMUST00000105371;ENSMUST00000128992;ENSMUST00000129235;ENSMUST00000144108;ENSMUST00000144119;ENSMUST00000144883;ENSMUST00000152592	20869	Stk11	serine/threonine kinase 11 [Source:MGI Symbol;Acc:MGI:1341870]	10	79951637	79966516	14880	+	2050	1867	2050	1441	1292	673	2023	2338	898	564	1766	1887	1623	2347	605	1414	758
ENSMUSG00000003072	ENSMUST00000003156;ENSMUST00000105366;ENSMUST00000105367;ENSMUST00000150347	66043	Atp5f1d	ATP synthase F1 subunit delta [Source:MGI Symbol;Acc:MGI:1913293]	10	79974466	79981652	7187	+	5535	6018	5914	5932	5167	4807	5241	5594	7083	5241	5201	4994	4665	6695	2848	3466	3445
ENSMUSG00000003099	ENSMUST00000003183;ENSMUST00000124573;ENSMUST00000127311;ENSMUST00000138353;ENSMUST00000142597;ENSMUST00000142831;ENSMUST00000145997;ENSMUST00000146920;ENSMUST00000153242;ENSMUST00000154880;ENSMUST00000156366	19060	Ppp5c	protein phosphatase 5, catalytic subunit [Source:MGI Symbol;Acc:MGI:102666]	7	16738565	16761849	23285	-	983	1137	984	994	986	751	1056	1245	1073	841	1035	906	804	1168	493	919	551
ENSMUSG00000003119	ENSMUST00000003203;ENSMUST00000107538;ENSMUST00000107539;ENSMUST00000125152;ENSMUST00000145113;ENSMUST00000147441	69131	Cdk12	cyclin dependent kinase 12 [Source:MGI Symbol;Acc:MGI:1098802]	11	98093885	98169330	75446	+	443	422	404	286	269	146	454	503	211	142	424	485	371	435	161	609	202
ENSMUSG00000003123	ENSMUST00000003207;ENSMUST00000054301;ENSMUST00000105177;ENSMUST00000149349;ENSMUST00000205698;ENSMUST00000205923;ENSMUST00000206588;ENSMUST00000206861	16890	Lipe	lipase, hormone sensitive [Source:MGI Symbol;Acc:MGI:96790]	7	25078952	25098135	19184	-	290	310	228	206	233	105	347	425	158	73	333	232	249	429	98	269	182
ENSMUSG00000003131	ENSMUST00000172450;ENSMUST00000213853;ENSMUST00000214179;ENSMUST00000214996;ENSMUST00000215060;ENSMUST00000215427;ENSMUST00000216334;ENSMUST00000217514;ENSMUST00000217636	18475	Pafah1b2	platelet-activating factor acetylhydrolase, isoform 1b, subunit 2 [Source:MGI Symbol;Acc:MGI:108415]	9	45874157	45923988	49832	-	660	707	618	893	822	882	925	1005	1335	930	714	737	619	704	516	921	558
ENSMUSG00000003134	ENSMUST00000054462;ENSMUST00000192099;ENSMUST00000192531;ENSMUST00000193823;ENSMUST00000195854	54610	Tbc1d8	TBC1 domain family, member 8 [Source:MGI Symbol;Acc:MGI:1927225]	1	39410573	39517836	107264	-	364	309	727	192	177	91	466	417	158	75	450	230	219	389	135	413	153
ENSMUSG00000003135	ENSMUST00000003219;ENSMUST00000160145;ENSMUST00000161515;ENSMUST00000195567	52846	Cnot11	CCR4-NOT transcription complex, subunit 11 [Source:MGI Symbol;Acc:MGI:106580]	1	39574073	39585970	11898	+	385	406	395	445	365	353	426	530	532	333	351	477	395	485	234	383	266
ENSMUSG00000003153	ENSMUST00000032476;ENSMUST00000165884;ENSMUST00000166135;ENSMUST00000168704;ENSMUST00000168801;ENSMUST00000169979;ENSMUST00000170724;ENSMUST00000171541	20527	Slc2a3	solute carrier family 2 (facilitated glucose transporter), member 3 [Source:MGI Symbol;Acc:MGI:95757]	6	122704768	122778599	73832	-	8	7	6	10	13	16	19	21	14	15	14	13	2	3	5	5	1
ENSMUSG00000003154	ENSMUST00000003238;ENSMUST00000203075	60611	Foxj2	forkhead box J2 [Source:MGI Symbol;Acc:MGI:1926805]	6	122796873	122822325	25453	+	252	262	282	166	161	108	333	387	149	92	256	249	224	277	68	193	132
ENSMUSG00000003161	ENSMUST00000003245;ENSMUST00000088786;ENSMUST00000144265;ENSMUST00000145119;ENSMUST00000148633;ENSMUST00000149420;ENSMUST00000197065	109552	Sri	sorcin [Source:MGI Symbol;Acc:MGI:98419]	5	8096078	8119379	23302	+	804	911	747	1096	880	1115	1071	1164	1641	1179	1044	800	642	869	579	997	736
ENSMUSG00000003166	ENSMUST00000012152;ENSMUST00000066127;ENSMUST00000117082;ENSMUST00000117945;ENSMUST00000126919;ENSMUST00000135229;ENSMUST00000155611;ENSMUST00000155943;ENSMUST00000231306;ENSMUST00000231750	13356	Dgcr2	DiGeorge syndrome critical region gene 2 [Source:MGI Symbol;Acc:MGI:892866]	16	17657346	17716426	59081	-	1812.45	1891.26	1969.19	1528	1459.25	717.32	2106.69	2343.74	1161.52	652.82	1774.85	1814.72	1621.59	2360.68	693.53	1836.19	1092.35
ENSMUSG00000003184	ENSMUST00000003284;ENSMUST00000107834;ENSMUST00000207128;ENSMUST00000207129;ENSMUST00000207476;ENSMUST00000207521;ENSMUST00000207555;ENSMUST00000208143;ENSMUST00000208767;ENSMUST00000208906;ENSMUST00000208958;ENSMUST00000209006;ENSMUST00000209066	54131	Irf3	interferon regulatory factor 3 [Source:MGI Symbol;Acc:MGI:1859179]	7	44647072	44652272	5201	+	1090	1179	1113	1129	916	747	1057	1082	1060	653	894	1367	1078	1359	663	762	741
ENSMUSG00000003190	ENSMUST00000003290;ENSMUST00000207213;ENSMUST00000207342;ENSMUST00000207443;ENSMUST00000207755;ENSMUST00000208128	75736	Bcl2l12	BCL2 like 12 [Source:MGI Symbol;Acc:MGI:1922986]	7	44640646	44648136	7491	-	87	78	83	96	84	59	87	121	114	83	83	100	107	105	40	67	46
ENSMUSG00000003198	ENSMUST00000054780;ENSMUST00000224294;ENSMUST00000224379	224893	Zfp959	zinc finger protein 959 [Source:MGI Symbol;Acc:MGI:2385058]	17	56199093	56205928	6836	+	141	153	146.52	132.89	131	147	112	142	211.87	158	111	127	125	155	125.51	164.18	149
ENSMUSG00000003199	ENSMUST00000124302;ENSMUST00000133998;ENSMUST00000140926;ENSMUST00000149441;ENSMUST00000153197;ENSMUST00000159340;ENSMUST00000159420;ENSMUST00000159996;ENSMUST00000162883	68047	Mpnd	MPN domain containing [Source:MGI Symbol;Acc:MGI:1915297]	17	56312711	56323790	11080	+	1504	1522	1527	1239	1064	947	1628	1377	1125	808	1220	1691	1281	1751	565	1122	701
ENSMUSG00000003200	ENSMUST00000003268;ENSMUST00000233034;ENSMUST00000233803	20405	Sh3gl1	SH3-domain GRB2-like 1 [Source:MGI Symbol;Acc:MGI:700010]	17	56323750	56343635	19886	-	381	356	339	446	328	245	580	617	442	255	451	473	386	485	173	334	265
ENSMUSG00000003206	ENSMUST00000003274	50498	Ebi3	Epstein-Barr virus induced gene 3 [Source:MGI Symbol;Acc:MGI:1354171]	17	56259640	56264022	4383	+	3	3	13	15	13	13	46	57	37	19	22	4	2	7	2	1	2
ENSMUSG00000003208	ENSMUST00000086869;ENSMUST00000233204;ENSMUST00000233226;ENSMUST00000233661	72886	Yju2	YJU2 splicing factor [Source:MGI Symbol;Acc:MGI:1920136]	17	56266099	56275285	9187	+	74	69	79	64	61	30	84	104	56	47	98	136	100	119	29	84	39
ENSMUSG00000003226	ENSMUST00000003310;ENSMUST00000219332;ENSMUST00000220131	19386	Ranbp2	RAN binding protein 2 [Source:MGI Symbol;Acc:MGI:894323]	10	58282742	58330178	47437	+	1848	1740	1917	1965	1692	1282	2097	2483	2210	1652	1793	2544	1959	2180	1171	3078	1244
ENSMUSG00000003228	ENSMUST00000003313;ENSMUST00000235623;ENSMUST00000236876	14773	Grk5	G protein-coupled receptor kinase 5 [Source:MGI Symbol;Acc:MGI:109161]	19	60878187	61084406	206220	+	111	88	131	106	70	61	197	303	126	60	135	230	314	375	39	71	36
ENSMUSG00000003233	ENSMUST00000003318;ENSMUST00000169552;ENSMUST00000171572;ENSMUST00000171774	13544	Dvl3	dishevelled segment polarity protein 3 [Source:MGI Symbol;Acc:MGI:108100]	16	20335732	20352760	17029	+	427	341	449	199	214	53	497	508	123	53	470	597	393	531	68	454	147
ENSMUSG00000003234	ENSMUST00000003319;ENSMUST00000135861;ENSMUST00000148679;ENSMUST00000152339;ENSMUST00000154660;ENSMUST00000231258;ENSMUST00000231590;ENSMUST00000232127;ENSMUST00000232490;ENSMUST00000232680	27406	Abcf3	ATP-binding cassette, sub-family F member 3 [Source:MGI Symbol;Acc:MGI:1351656]	16	20367327	20380129	12803	+	871	896	899	1045	851	746	1116	1148	1058	699	832	1442	989	1198	529	787	496
ENSMUSG00000003235	ENSMUST00000003320;ENSMUST00000148714;ENSMUST00000231315	224045	Eif2b5	eukaryotic translation initiation factor 2B, subunit 5 epsilon [Source:MGI Symbol;Acc:MGI:2446176]	16	20317567	20328073	10507	+	840	1018	839	876	724	543	841	1032	797	536	697	1024	902	1175	566	891	594
ENSMUSG00000003269	ENSMUST00000107729;ENSMUST00000209245;ENSMUST00000210137;ENSMUST00000210853;ENSMUST00000210898;ENSMUST00000211263;ENSMUST00000211783;ENSMUST00000223361;ENSMUST00000247844	19158	Cyth2	cytohesin 2 [Source:MGI Symbol;Acc:MGI:1334255]	7	45456061	45464005	7945	-	453	450	458	414	411	371	544	740	729	446	486	455	298	448	273	309	260
ENSMUSG00000003279	ENSMUST00000060072;ENSMUST00000097288;ENSMUST00000125691;ENSMUST00000126801;ENSMUST00000130971;ENSMUST00000133717;ENSMUST00000133983;ENSMUST00000135938;ENSMUST00000140728;ENSMUST00000146730;ENSMUST00000148486;ENSMUST00000150260;ENSMUST00000150798;ENSMUST00000155016;ENSMUST00000155823;ENSMUST00000156946;ENSMUST00000232998;ENSMUST00000233173;ENSMUST00000233283;ENSMUST00000233780	224997	Dlgap1	DLG associated protein 1 [Source:MGI Symbol;Acc:MGI:1346065]	17	70276068	71128408	852341	+	41	45	54	27	18	23	33	40	18	12	33	20	24	33	8	25	21
ENSMUSG00000003283	ENSMUST00000003370;ENSMUST00000109799;ENSMUST00000189688	15162	Hck	hemopoietic cell kinase [Source:MGI Symbol;Acc:MGI:96052]	2	152950388	152993361	42974	+	60	72	60	75	71	79	312	357	305	108	115	69	33	66	18	23	12
ENSMUSG00000003299	ENSMUST00000003386;ENSMUST00000213977;ENSMUST00000214124;ENSMUST00000216175;ENSMUST00000216325;ENSMUST00000216466;ENSMUST00000216818;ENSMUST00000216824	66163	Mrpl4	mitochondrial ribosomal protein L4 [Source:MGI Symbol;Acc:MGI:2137210]	9	20914034	20920135	6102	+	610	676	646	661	535	414	545	633	580	429	520	725	604	881	331	427	361
ENSMUSG00000003308	ENSMUST00000049567;ENSMUST00000164812;ENSMUST00000193247;ENSMUST00000193982;ENSMUST00000194542;ENSMUST00000216436	50868	Keap1	kelch-like ECH-associated protein 1 [Source:MGI Symbol;Acc:MGI:1858732]	9	21141026	21150657	9632	-	1142	1138	1245	1079	1003	696	1407	1424	1068	638	1260	1517	1237	1562	483	886	536
ENSMUSG00000003316	ENSMUST00000003404;ENSMUST00000164283;ENSMUST00000168741;ENSMUST00000169020	20340	Glg1	golgi apparatus protein 1 [Source:MGI Symbol;Acc:MGI:104967]	8	111881053	111985848	104796	-	802	724	845	634	569	289	1205	1406	460	260	1138	1120	844	1146	340	1165	432
ENSMUSG00000003344	ENSMUST00000126980;ENSMUST00000131876;ENSMUST00000147162;ENSMUST00000151794	208198	Btbd2	BTB domain containing 2 [Source:MGI Symbol;Acc:MGI:1933831]	10	80478451	80492328	13878	-	490	552	522	520	438	255	618	685	396	225	597	420	408	589	270	417	342
ENSMUSG00000003345	ENSMUST00000079773;ENSMUST00000085435;ENSMUST00000217902;ENSMUST00000218093;ENSMUST00000219814;ENSMUST00000220025;ENSMUST00000220163;ENSMUST00000220431	103236	Csnk1g2	casein kinase 1, gamma 2 [Source:MGI Symbol;Acc:MGI:1920014]	10	80458672	80476583	17912	+	1336	1503	1543	1459	1296	1060	1769	1936	1453	1050	1624	1522	1118	1655	663	1052	855
ENSMUSG00000003346	ENSMUST00000003436;ENSMUST00000187646;ENSMUST00000189605;ENSMUST00000191440	216169	Abhd17a	abhydrolase domain containing 17A [Source:MGI Symbol;Acc:MGI:106388]	10	80419488	80426175	6688	-	1124	1229	1103	1245	1182	975	1358	1313	1335	1066	1323	1120	984	1418	555	781	749
ENSMUSG00000003348	ENSMUST00000003438;ENSMUST00000218090;ENSMUST00000218439;ENSMUST00000220138	208228	Mob3a	MOB kinase activator 3A [Source:MGI Symbol;Acc:MGI:3050117]	10	80521087	80537811	16725	-	52	75	92	62	56	70	201	156	142	84	112	124	67	89	24	61	56
ENSMUSG00000003352	ENSMUST00000003442;ENSMUST00000109150;ENSMUST00000229223;ENSMUST00000229282;ENSMUST00000230064;ENSMUST00000230490;ENSMUST00000230769	12297	Cacnb3	calcium channel, voltage-dependent, beta 3 subunit [Source:MGI Symbol;Acc:MGI:103307]	15	98528721	98542410	13690	+	7	13	12	11	14	10	24	25	11	11	38	11	14	14	4	11	4
ENSMUSG00000003355	ENSMUST00000003445;ENSMUST00000229562;ENSMUST00000230743	66120	Fkbp11	FK506 binding protein 11 [Source:MGI Symbol;Acc:MGI:1913370]	15	98622247	98626079	3833	-	263	323	252	467	305	744	464	511	1339	1021	544	410	182	239	288	379	507
ENSMUSG00000003360	ENSMUST00000003450;ENSMUST00000159170;ENSMUST00000159423;ENSMUST00000160506;ENSMUST00000161030;ENSMUST00000162384;ENSMUST00000228973	74351	Ddx23	DEAD box helicase 23 [Source:MGI Symbol;Acc:MGI:1921601]	15	98543015	98560775	17761	-	1111	1082	1011	790	722	494	1111	1295	649	468	977	1272	1020	1424	433	907	479
ENSMUSG00000003363	ENSMUST00000117095;ENSMUST00000117611;ENSMUST00000127240;ENSMUST00000131106;ENSMUST00000142981;ENSMUST00000143903;ENSMUST00000150964;ENSMUST00000155287	18807	Pld3	phospholipase D family member 3 [Source:MGI Symbol;Acc:MGI:1333782]	7	27231425	27252643	21219	-	471	498	533	439	454	240	936	615	352	195	615	536	405	545	168	269	220
ENSMUSG00000003378	ENSMUST00000003468;ENSMUST00000205328;ENSMUST00000205661;ENSMUST00000205993;ENSMUST00000206095;ENSMUST00000206132;ENSMUST00000206134	14809	Grik5	glutamate receptor, ionotropic, kainate 5 (gamma 2) [Source:MGI Symbol;Acc:MGI:95818]	7	24709274	24771771	62498	-	160	206	169	111	93	38	113	178	34	25	114	156	148	223	62	191	113
ENSMUSG00000003379	ENSMUST00000003469	12518	Cd79a	CD79A antigen (immunoglobulin-associated alpha) [Source:MGI Symbol;Acc:MGI:101774]	7	24596806	24601622	4817	+	10	16	13	26	14	15	13	24	20	15	10	30	5	7	7	6	4
ENSMUSG00000003380	ENSMUST00000076961;ENSMUST00000205771;ENSMUST00000205871;ENSMUST00000206222;ENSMUST00000206868;ENSMUST00000206941	14470	Rabac1	Rab acceptor 1 (prenylated) [Source:MGI Symbol;Acc:MGI:1201692]	7	24669177	24672179	3003	-	1063	1142	1163	1065	1002	1037	1004	896	1324	1342	922	914	812	1125	583	550	658
ENSMUSG00000003382	ENSMUST00000117293;ENSMUST00000119109;ENSMUST00000136680;ENSMUST00000152010;ENSMUST00000170036	27049	Etv3	ets variant 3 [Source:MGI Symbol;Acc:MGI:1350926]	3	87432714	87447463	14750	+	351	318	359	263	234	145	321	411	266	143	317	390	327	444	142	376	194
ENSMUSG00000003402	ENSMUST00000003493;ENSMUST00000115331;ENSMUST00000214565;ENSMUST00000215795;ENSMUST00000216344	19089	Prkcsh	protein kinase C substrate 80K-H [Source:MGI Symbol;Acc:MGI:107877]	9	21914102	21925518	11417	+	2932	3092	2683	2401	2022	1358	2848	2911	1860	1156	2670	3263	2492	3383	1317	2197	1495
ENSMUSG00000003411	ENSMUST00000003502;ENSMUST00000106650;ENSMUST00000106651;ENSMUST00000157062	69908	Rab3b	RAB3B, member RAS oncogene family [Source:MGI Symbol;Acc:MGI:1917158]	4	108736260	108800521	64262	+	7	2	7	10	12	10	21	34	28	11	34	8	5	6	3	1	1
ENSMUSG00000003420	ENSMUST00000003512;ENSMUST00000209830;ENSMUST00000210642;ENSMUST00000211085;ENSMUST00000211535;ENSMUST00000211668	14132	Fcgrt	Fc fragment of IgG receptor and transporter [Source:MGI Symbol;Acc:MGI:103017]	7	44742414	44753275	10862	-	3288	3452	3089	3591	3393	2652	3306	3662	4015	2986	3405	2792	2469	3747	2101	2174	2093
ENSMUSG00000003421	ENSMUST00000003513;ENSMUST00000107829;ENSMUST00000209243;ENSMUST00000209308;ENSMUST00000209901;ENSMUST00000210088;ENSMUST00000210520;ENSMUST00000210668;ENSMUST00000210998;ENSMUST00000211465	66394	Nosip	nitric oxide synthase interacting protein [Source:MGI Symbol;Acc:MGI:1913644]	7	44711853	44727634	15782	+	365	378	334	424	407	309	548	615	546	275	495	404	322	438	184	339	242
ENSMUSG00000003423	ENSMUST00000085375;ENSMUST00000107811;ENSMUST00000209400;ENSMUST00000209847;ENSMUST00000209954;ENSMUST00000210139;ENSMUST00000211336;ENSMUST00000211414;ENSMUST00000211709	68845	Pih1d1	PIH1 domain containing 1 [Source:MGI Symbol;Acc:MGI:1916095]	7	44803727	44809489	5763	+	643	746	774	741	729	858	776	807	1457	1080	723	633	551	817	539	521	490
ENSMUSG00000003429	ENSMUST00000003521;ENSMUST00000209838;ENSMUST00000211583;ENSMUST00000211725	27207	Rps11	ribosomal protein S11 [Source:MGI Symbol;Acc:MGI:1351329]	7	44771803	44773863	2061	-	4230.55	5012.55	4373	6567.57	5505	9605.63	5348	5416.14	14496.2	11344	5345	4984	3402	4880.51	4013.71	3543	4593
ENSMUSG00000003435	ENSMUST00000003527;ENSMUST00000207563;ENSMUST00000207879;ENSMUST00000208243;ENSMUST00000208367;ENSMUST00000208726;ENSMUST00000209105;ENSMUST00000209141	20924	Supt5	suppressor of Ty 5, DSIF elongation factor subunit [Source:MGI Symbol;Acc:MGI:1202400]	7	28014316	28038171	23856	-	1236	1047	1679	995	923	437	2072	1993	856	565	1909	2186	1485	1859	459	1447	568
ENSMUSG00000003437	ENSMUST00000003529;ENSMUST00000122857;ENSMUST00000132910;ENSMUST00000143201;ENSMUST00000145339;ENSMUST00000146604;ENSMUST00000146886;ENSMUST00000146913;ENSMUST00000152512;ENSMUST00000154823	54624	Paf1	Paf1, RNA polymerase II complex component [Source:MGI Symbol;Acc:MGI:1923988]	7	28092376	28098813	6438	+	621	653	636	616	514	345	707	819	588	346	631	763	555	750	314	626	274
ENSMUSG00000003438	ENSMUST00000081946;ENSMUST00000131849;ENSMUST00000134263;ENSMUST00000135220;ENSMUST00000136427;ENSMUST00000151990	66525	Timm50	translocase of inner mitochondrial membrane 50 [Source:MGI Symbol;Acc:MGI:1913775]	7	28004941	28011497	6557	-	607	644	663	720	643	617	906	857	1015	752	846	683	570	856	391	550	457
ENSMUSG00000003444	ENSMUST00000003536	67224	Med29	mediator complex subunit 29 [Source:MGI Symbol;Acc:MGI:1914474]	7	28085571	28092133	6563	-	318	323	383	375	306	235	371	352	428	299	293	361	286	365	142	330	191
ENSMUSG00000003458	ENSMUST00000003550;ENSMUST00000122986;ENSMUST00000135928;ENSMUST00000140643;ENSMUST00000142825;ENSMUST00000146137	59287	Ncstn	nicastrin [Source:MGI Symbol;Acc:MGI:1891700]	1	171893580	171910362	16783	-	1028	1040	1113	880	862	416	1416	1540	749	410	1305	1262	948	1366	407	1042	550
ENSMUSG00000003464	ENSMUST00000075895;ENSMUST00000111252;ENSMUST00000127662;ENSMUST00000133081;ENSMUST00000133546;ENSMUST00000147799	19298	Pex19	peroxisomal biogenesis factor 19 [Source:MGI Symbol;Acc:MGI:1334458]	1	171954322	171964060	9739	+	2233	2370	1979	2579	2635	1908	2482	2570	2919	1778	2760	2272	1963	2681	1628	2185	1635
ENSMUSG00000003477	ENSMUST00000003569;ENSMUST00000152720	21743	Inmt	indolethylamine N-methyltransferase [Source:MGI Symbol;Acc:MGI:102963]	6	55147611	55152028	4418	-	22945	38878	18163	37669	30814	38253	16331	36257	83347	48033	24057	15501	16291	19676	22018	29460	32187
ENSMUSG00000003484	ENSMUST00000003574;ENSMUST00000125448;ENSMUST00000141975	72054	Cyp4f18	cytochrome P450, family 4, subfamily f, polypeptide 18 [Source:MGI Symbol;Acc:MGI:1919304]	8	72742326	72763470	21145	-	3	3	6	17	28	43	176	60	91	37	75	7	0	6	0	3	3
ENSMUSG00000003500	ENSMUST00000078155;ENSMUST00000159124;ENSMUST00000160613;ENSMUST00000160749;ENSMUST00000160878;ENSMUST00000161654;ENSMUST00000162099;ENSMUST00000162215;ENSMUST00000162242;ENSMUST00000162739	23917	Impdh1	inosine monophosphate dehydrogenase 1 [Source:MGI Symbol;Acc:MGI:96567]	6	29200433	29216363	15931	-	43	51	36	51	50	29	92	84	43	27	99	66	57	51	16	41	29
ENSMUSG00000003518	ENSMUST00000003612;ENSMUST00000107172;ENSMUST00000107173;ENSMUST00000125794;ENSMUST00000143177;ENSMUST00000151678;ENSMUST00000176261	72349	Dusp3	dual specificity phosphatase 3 (vaccinia virus phosphatase VH1-related) [Source:MGI Symbol;Acc:MGI:1919599]	11	101861969	101877839	15871	-	915	951	1042	875	1021	831	1426	1504	1356	982	1169	1063	847	1172	493	855	579
ENSMUSG00000003526	ENSMUST00000003620;ENSMUST00000123969;ENSMUST00000126087;ENSMUST00000132241;ENSMUST00000136776;ENSMUST00000139861;ENSMUST00000141635;ENSMUST00000232384;ENSMUST00000232502;ENSMUST00000232554	19125	Prodh	proline dehydrogenase [Source:MGI Symbol;Acc:MGI:97770]	16	17878221	17908067	29847	-	3471	4304	3567	3379	2723	1510	3426	3807	1993	1357	2970	3006	3771	3924	1560	4237	2054
ENSMUSG00000003527	ENSMUST00000003621;ENSMUST00000231921;ENSMUST00000232111;ENSMUST00000232366;ENSMUST00000232423	27886	Ess2	ess-2 splicing factor [Source:MGI Symbol;Acc:MGI:107854]	16	17718573	17729212	10640	-	123	121	145	154	116	102	186	226	181	76	136	173	140	148	77	120	93
ENSMUSG00000003528	ENSMUST00000003622;ENSMUST00000129270;ENSMUST00000131507;ENSMUST00000142022;ENSMUST00000147384;ENSMUST00000150925	13358	Slc25a1	solute carrier family 25 (mitochondrial carrier, citrate transporter), member 1 [Source:MGI Symbol;Acc:MGI:1345283]	16	17743087	17746083	2997	-	3581	3758	3508	2897	2296	2046	2508	3245	2434	1635	2736	3680	3219	4344	1521	2845	2160
ENSMUSG00000003531	ENSMUST00000066027;ENSMUST00000076757;ENSMUST00000143343;ENSMUST00000148372;ENSMUST00000148521;ENSMUST00000151266;ENSMUST00000153123;ENSMUST00000155387	13353	Dgcr6	DiGeorge syndrome critical region gene 6 [Source:MGI Symbol;Acc:MGI:1202877]	16	17870724	17889496	18773	+	776	964	908	1064	920	1203	699	752	1609	1333	645	707	638	955	583	479	577
ENSMUSG00000003534	ENSMUST00000003628;ENSMUST00000097333;ENSMUST00000117301;ENSMUST00000119825;ENSMUST00000134995;ENSMUST00000135078;ENSMUST00000145900;ENSMUST00000146472;ENSMUST00000148065;ENSMUST00000155628;ENSMUST00000155957;ENSMUST00000166980	12305	Ddr1	discoidin domain receptor family, member 1 [Source:MGI Symbol;Acc:MGI:99216]	17	35992459	36015513	23055	-	34	47	48	34	33	39	273	161	59	30	219	60	39	44	10	33	7
ENSMUSG00000003541	ENSMUST00000003635	15937	Ier3	immediate early response 3 [Source:MGI Symbol;Acc:MGI:104814]	17	36132576	36133815	1240	+	14	13	11	19	21	18	90	53	46	31	64	25	12	7	10	8	7
ENSMUSG00000003545	ENSMUST00000003640;ENSMUST00000207334;ENSMUST00000207716;ENSMUST00000208230;ENSMUST00000208326;ENSMUST00000208446;ENSMUST00000208505	14282	Fosb	FBJ osteosarcoma oncogene B [Source:MGI Symbol;Acc:MGI:95575]	7	19036621	19043976	7356	-	3	1	5	3	1	1	5	16	9	4	9	8	2	4	0	14	4
ENSMUSG00000003546	ENSMUST00000003642;ENSMUST00000233974	74764	Klc4	kinesin light chain 4 [Source:MGI Symbol;Acc:MGI:1922014]	17	46941550	46956948	15399	-	1220	1536	1413	1312	1125	1013	1261	1421	1212	951	1183	1070	1044	1434	596	993	679
ENSMUSG00000003549	ENSMUST00000003645;ENSMUST00000160192;ENSMUST00000160369;ENSMUST00000160909;ENSMUST00000161378;ENSMUST00000162197;ENSMUST00000162992;ENSMUST00000176723;ENSMUST00000176818;ENSMUST00000177486	13870	Ercc1	excision repair cross-complementing rodent repair deficiency, complementation group 1 [Source:MGI Symbol;Acc:MGI:95412]	7	19078703	19090449	11747	+	84	74	76	83	62	69	101	118	100	58	71	88	60	112	38	47	47
ENSMUSG00000003555	ENSMUST00000026012;ENSMUST00000131142;ENSMUST00000156577;ENSMUST00000236174	13074	Cyp17a1	cytochrome P450, family 17, subfamily a, polypeptide 1 [Source:MGI Symbol;Acc:MGI:88586]	19	46655604	46661611	6008	-	203	126	1608	48	23	36	170	50	41	140	195	56	260	74	42	90	57
ENSMUSG00000003559	ENSMUST00000003655;ENSMUST00000235266;ENSMUST00000235842;ENSMUST00000236063;ENSMUST00000236465;ENSMUST00000236473;ENSMUST00000237219	57344	As3mt	arsenite methyltransferase [Source:MGI Symbol;Acc:MGI:1929882]	19	46695897	46729538	33642	+	921	884	1221	706	477	678	1033	747	1018	1083	949	817	816	852	432	748	505
ENSMUSG00000003573	ENSMUST00000003669;ENSMUST00000087467;ENSMUST00000110124;ENSMUST00000135368;ENSMUST00000135692;ENSMUST00000140212;ENSMUST00000143528;ENSMUST00000155711	26558	Homer3	homer scaffolding protein 3 [Source:MGI Symbol;Acc:MGI:1347359]	8	70735477	70747011	11535	+	41	26	26	37	45	29	94	99	75	34	95	44	47	59	12	41	18
ENSMUSG00000003575	ENSMUST00000076615;ENSMUST00000125273;ENSMUST00000125613;ENSMUST00000142769;ENSMUST00000153632	382056	Crtc1	CREB regulated transcription coactivator 1 [Source:MGI Symbol;Acc:MGI:2142523]	8	70835005	70892229	57225	-	210	171	209	129	106	42	248	238	55	29	213	298	208	304	41	170	62
ENSMUSG00000003581	ENSMUST00000003677;ENSMUST00000124670;ENSMUST00000127165;ENSMUST00000145705	71673	Rnf215	ring finger protein 215 [Source:MGI Symbol;Acc:MGI:1918923]	11	4085202	4091172	5971	+	174	223	210	224	193	155	226	219	265	126	197	237	199	245	99	166	147
ENSMUSG00000003585	ENSMUST00000003681;ENSMUST00000123901;ENSMUST00000132421;ENSMUST00000133631;ENSMUST00000136420;ENSMUST00000145173	67815	Sec14l2	SEC14-like lipid binding 2 [Source:MGI Symbol;Acc:MGI:1915065]	11	4047039	4073415	26377	-	15590	18421	13999	20207	16128	12375	14278	16830	15441	10621	15531	16358	16686	22781	9477	11918	9053
ENSMUSG00000003604	ENSMUST00000003705;ENSMUST00000099588;ENSMUST00000127894	74268	Aven	apoptosis, caspase activation inhibitor [Source:MGI Symbol;Acc:MGI:1921518]	2	112323309	112464918	141610	+	368	383	367	301	278	200	310	420	308	211	339	377	293	418	160	287	175
ENSMUSG00000003617	ENSMUST00000003714;ENSMUST00000091309;ENSMUST00000108325;ENSMUST00000108328;ENSMUST00000108329;ENSMUST00000125994;ENSMUST00000128615;ENSMUST00000129135;ENSMUST00000131454;ENSMUST00000131811;ENSMUST00000150264;ENSMUST00000172605;ENSMUST00000172860;ENSMUST00000173779;ENSMUST00000173848;ENSMUST00000174803	12870	Cp	ceruloplasmin [Source:MGI Symbol;Acc:MGI:88476]	3	20011218	20063309	52092	+	25494	24547	19861	23631	22805	19606	49933	38107	34002	19015	35678	36063	24238	30473	16764	36190	18190
ENSMUSG00000003623	ENSMUST00000003720;ENSMUST00000146115;ENSMUST00000157024	74114	Crot	carnitine O-octanoyltransferase [Source:MGI Symbol;Acc:MGI:1921364]	5	9016033	9047324	31292	-	16165	15809	13945	22308	24902	28215	14223	10785	30790	21250	14069	21988	15325	26532	17022	12753	11796
ENSMUSG00000003644	ENSMUST00000003741;ENSMUST00000105894;ENSMUST00000129636;ENSMUST00000137486;ENSMUST00000157067;ENSMUST00000168974;ENSMUST00000173961;ENSMUST00000173989;ENSMUST00000174481	20111	Rps6ka1	ribosomal protein S6 kinase polypeptide 1 [Source:MGI Symbol;Acc:MGI:104558]	4	133574601	133615108	40508	-	315	353	260	450	354	233	469	633	416	185	359	333	257	318	176	383	245
ENSMUSG00000003660	ENSMUST00000103220;ENSMUST00000131435;ENSMUST00000140868;ENSMUST00000142327;ENSMUST00000143481	320632	Snrnp200	small nuclear ribonucleoprotein 200 (U5) [Source:MGI Symbol;Acc:MGI:2444401]	2	127050306	127082371	32066	+	1441	1354	1465	1191	934	704	1519	1805	1131	750	1474	1883	1546	1923	673	1783	934
ENSMUSG00000003662	ENSMUST00000003759;ENSMUST00000143575;ENSMUST00000172636;ENSMUST00000174030;ENSMUST00000174863	26371	Ciao1	cytosolic iron-sulfur protein assembly 1 [Source:MGI Symbol;Acc:MGI:1346998]	2	127082858	127089736	6879	-	843	887	905	1230	1036	1123	903	1119	1646	1158	876	788	717	954	594	836	739
ENSMUSG00000003680	ENSMUST00000003777;ENSMUST00000176080;ENSMUST00000176331;ENSMUST00000176496;ENSMUST00000176610;ENSMUST00000176688;ENSMUST00000176719;ENSMUST00000176747;ENSMUST00000176991;ENSMUST00000177056;ENSMUST00000177216;ENSMUST00000189739	225895;100039957	Taf6l	TATA-box binding protein associated factor 6 like [Source:MGI Symbol;Acc:MGI:2444957]	19	8751851	8763781	11931	-	69	71	70	68	58	39	98	91	83	51	78	76	68	79	35	42	34
ENSMUSG00000003721	ENSMUST00000003818;ENSMUST00000071064;ENSMUST00000159085;ENSMUST00000159125;ENSMUST00000159192;ENSMUST00000159528;ENSMUST00000160688;ENSMUST00000160968;ENSMUST00000161068;ENSMUST00000161818;ENSMUST00000162019;ENSMUST00000162582;ENSMUST00000162790;ENSMUST00000186915	72999	Insig2	insulin induced gene 2 [Source:MGI Symbol;Acc:MGI:1920249]	1	121232082	121260318	28237	-	4045	3456	4140	4400	5480	3223	2708	2424	5312	3396	2629	5994	7912	8984	2646	2347	1451
ENSMUSG00000003731	ENSMUST00000003828;ENSMUST00000102590;ENSMUST00000126010;ENSMUST00000138916;ENSMUST00000146215;ENSMUST00000146361	16650	Kpna6	karyopherin subunit alpha 6 [Source:MGI Symbol;Acc:MGI:1100836]	4	129537773	129566560	28788	-	1172	1041	1205	873	783	354	1195	1252	628	350	1000	1483	1136	1405	433	1372	543
ENSMUSG00000003746	ENSMUST00000003843;ENSMUST00000105469;ENSMUST00000105470;ENSMUST00000133330;ENSMUST00000146483;ENSMUST00000218317;ENSMUST00000219234;ENSMUST00000220088	17155	Man1a	mannosidase 1, alpha [Source:MGI Symbol;Acc:MGI:104677]	10	53780881	53952705	171825	-	5494	5878	6539	4688	4753	3839	5273	5170	5026	4263	4710	4996	5038	6852	2927	5090	3113
ENSMUSG00000003752	ENSMUST00000003850;ENSMUST00000147170;ENSMUST00000149067;ENSMUST00000206441	233011	Itpkc	inositol 1,4,5-trisphosphate 3-kinase C [Source:MGI Symbol;Acc:MGI:2442554]	7	26906597	26928086	21490	-	119	141	209	125	145	112	255	224	128	104	183	196	123	214	68	121	94
ENSMUSG00000003762	ENSMUST00000003860;ENSMUST00000108378;ENSMUST00000123012;ENSMUST00000128090;ENSMUST00000142910;ENSMUST00000143372;ENSMUST00000206312	76889	Coq8b	coenzyme Q8B [Source:MGI Symbol;Acc:MGI:1924139]	7	26932448	26957375	24928	+	333	369	504	501.99	371	340	778	541.98	721.95	582.97	828.94	343	256	388	191	237	252
ENSMUSG00000003778	ENSMUST00000003876;ENSMUST00000097626;ENSMUST00000115765;ENSMUST00000115766;ENSMUST00000127159;ENSMUST00000145431;ENSMUST00000152612;ENSMUST00000153569	78656	Brd8	bromodomain containing 8 [Source:MGI Symbol;Acc:MGI:1925906]	18	34731668	34757654	25987	-	306	315	346	398	301	261	540	712	514	266	420	478	358	424	214	449	253
ENSMUSG00000003779	ENSMUST00000166044;ENSMUST00000167161;ENSMUST00000235174;ENSMUST00000236114;ENSMUST00000237407;ENSMUST00000237481	19348	Kif20a	kinesin family member 20A [Source:MGI Symbol;Acc:MGI:1201682]	18	34757666	34766330	8665	+	25	16	31	67	82	61	580	1127	864	391	560	8	13	17	8	20	8
ENSMUSG00000003808	ENSMUST00000003906;ENSMUST00000109754;ENSMUST00000129595;ENSMUST00000141480;ENSMUST00000144404;ENSMUST00000156970	66590	Farsa	phenylalanyl-tRNA synthetase, alpha subunit [Source:MGI Symbol;Acc:MGI:1913840]	8	85583618	85595886	12269	+	378	356	386	348	279	209	446	532	361	222	393	575	395	526	195	337	225
ENSMUSG00000003809	ENSMUST00000003907;ENSMUST00000109745;ENSMUST00000128023;ENSMUST00000136462;ENSMUST00000139180;ENSMUST00000142748	270076	Gcdh	glutaryl-Coenzyme A dehydrogenase [Source:MGI Symbol;Acc:MGI:104541]	8	85613022	85620550	7529	-	14543	17660	12579	16405	14740	13133	12158	13784	17230	11325	10971	12171	12846	17385	10058	13905	10328
ENSMUSG00000003810	ENSMUST00000003908;ENSMUST00000106484;ENSMUST00000123072;ENSMUST00000123761;ENSMUST00000128252;ENSMUST00000128713;ENSMUST00000131809;ENSMUST00000134460;ENSMUST00000144281;ENSMUST00000147262;ENSMUST00000147459;ENSMUST00000151347;ENSMUST00000156884;ENSMUST00000239177;ENSMUST00000239239	17776	Mast2	microtubule associated serine/threonine kinase 2 [Source:MGI Symbol;Acc:MGI:894676]	4	116163959	116321471	157513	-	455	388	439	268	294	74	707	1004	241	87	590	632	452	588	122	503	203
ENSMUSG00000003812	ENSMUST00000003910;ENSMUST00000109744;ENSMUST00000128400;ENSMUST00000134569;ENSMUST00000135219;ENSMUST00000145292;ENSMUST00000148573;ENSMUST00000153215;ENSMUST00000155942	13423;100503676	Dnase2a	deoxyribonuclease II alpha [Source:MGI Symbol;Acc:MGI:1329019]	8	85635189	85649544	14356	+	410	415	408	454	422	512	533	530	809	486	468	436	288	471	299	360	337
ENSMUSG00000003813	ENSMUST00000003911;ENSMUST00000109761;ENSMUST00000125711;ENSMUST00000128035;ENSMUST00000134395;ENSMUST00000144675;ENSMUST00000144994	19358	Rad23a	RAD23 homolog A, nucleotide excision repair protein [Source:MGI Symbol;Acc:MGI:105126]	8	85560648	85567294	6647	-	956	991	976	756	668	416	908	1132	751	426	855	991	906	1148	549	871	649
ENSMUSG00000003814	ENSMUST00000003912;ENSMUST00000125998;ENSMUST00000128028;ENSMUST00000154774	12317	Calr	calreticulin [Source:MGI Symbol;Acc:MGI:88252]	8	85568479	85573563	5085	-	19799	21157	17977	21696	16490	19296	19641	19819	19475	10140	12518	27054	20096	26387	10686	16720	12446
ENSMUSG00000003824	ENSMUST00000003922;ENSMUST00000136026;ENSMUST00000144466;ENSMUST00000170296	71846	Syce2	synaptonemal complex central element protein 2 [Source:MGI Symbol;Acc:MGI:1919096]	8	85598740	85614850	16111	+	17	20	28	24	38	31	71	85	148	77	47	9	14	13	12	11	12
ENSMUSG00000003847	ENSMUST00000075922;ENSMUST00000077440;ENSMUST00000125721;ENSMUST00000126333;ENSMUST00000126397;ENSMUST00000133026;ENSMUST00000144100;ENSMUST00000147588;ENSMUST00000148006;ENSMUST00000149972;ENSMUST00000151114;ENSMUST00000151582;ENSMUST00000154474;ENSMUST00000169453	54446	Nfat5	nuclear factor of activated T cells 5 [Source:MGI Symbol;Acc:MGI:1859333]	8	108020102	108106149	86048	+	1066	792	1063	536	483	173	960	1177	266	141	900	908	804	981	265	1527	474
ENSMUSG00000003848	ENSMUST00000003946;ENSMUST00000076585;ENSMUST00000109273;ENSMUST00000163757;ENSMUST00000163973;ENSMUST00000165266;ENSMUST00000169311;ENSMUST00000170796	67619	Nob1	NIN1/RPN12 binding protein 1 homolog [Source:MGI Symbol;Acc:MGI:1914869]	8	108139118	108151683	12566	-	195	183	197	172	154	126	241	240	242	156	229	235	164	212	110	175	103
ENSMUSG00000003849	ENSMUST00000003947	18104	Nqo1	NAD(P)H dehydrogenase, quinone 1 [Source:MGI Symbol;Acc:MGI:103187]	8	108114857	108129838	14982	-	109	167	228	206	227	315	551	285	1152	828	532	229	253	309	228	324	217
ENSMUSG00000003865	ENSMUST00000003964;ENSMUST00000209230;ENSMUST00000209640;ENSMUST00000210563;ENSMUST00000210715;ENSMUST00000211150	14936	Gys1	glycogen synthase 1, muscle [Source:MGI Symbol;Acc:MGI:101805]	7	45084268	45106043	21776	+	31	41	53	35	32	26	90	73	42	22	51	84	68	59	5	54	29
ENSMUSG00000003868	ENSMUST00000107771;ENSMUST00000209426;ENSMUST00000210271;ENSMUST00000210439;ENSMUST00000211214;ENSMUST00000211440;ENSMUST00000211478;ENSMUST00000211666	20174	Ruvbl2	RuvB-like AAA ATPase 2 [Source:MGI Symbol;Acc:MGI:1342299]	7	45071184	45087520	16337	-	225	232	253	242	181	163	340	424	343	198	316	350	277	303	132	223	135
ENSMUSG00000003873	ENSMUST00000033093;ENSMUST00000210019;ENSMUST00000210392;ENSMUST00000211195;ENSMUST00000211365;ENSMUST00000211615	12028	Bax	BCL2-associated X protein [Source:MGI Symbol;Acc:MGI:99702]	7	45111121	45116322	5202	-	420.91	357.98	476.95	397	383	489.99	688.95	609.96	986.9	736.97	560.98	917	647	1036.99	515.91	465.98	528
ENSMUSG00000003882	ENSMUST00000003981;ENSMUST00000227234;ENSMUST00000228673;ENSMUST00000228782	16197	Il7r	interleukin 7 receptor [Source:MGI Symbol;Acc:MGI:96562]	15	9505874	9530262	24389	-	2	2	6	8	8	5	11	16	11	9	11	4	6	4	2	3	3
ENSMUSG00000003923	ENSMUST00000092430;ENSMUST00000105432;ENSMUST00000121685;ENSMUST00000145220;ENSMUST00000152505	21780	Tfam	transcription factor A, mitochondrial [Source:MGI Symbol;Acc:MGI:107810]	10	71061294	71074110	12817	-	1042	1070	1031	1235	1166	1055	1048	1234	1682	1216	1023	996	816	1025	810	1128	804
ENSMUSG00000003929	ENSMUST00000054072;ENSMUST00000234016;ENSMUST00000235063	224694	Zfp81	zinc finger protein 81 [Source:MGI Symbol;Acc:MGI:1890752]	17	33548316	33577852	29537	-	84	107	115	111	105	104	93	189	173	96	84	98	102	128	94	108	87
ENSMUSG00000003948	ENSMUST00000004050;ENSMUST00000107887	67468	Mmd	monocyte to macrophage differentiation-associated [Source:MGI Symbol;Acc:MGI:1914718]	11	90140282	90169415	29134	+	4247.51	4120.85	3519.87	5228.38	6021.97	5017.89	4949.28	4837.34	9507.88	6528.59	4212.2	4644.61	4524.28	6263.1	4409.17	4812.21	3978.45
ENSMUSG00000003949	ENSMUST00000004051;ENSMUST00000043658;ENSMUST00000107881;ENSMUST00000137957;ENSMUST00000145786;ENSMUST00000176001	217082	Hlf	hepatic leukemia factor [Source:MGI Symbol;Acc:MGI:96108]	11	90227362	90281721	54360	-	1037	1292	876	1170	981	486	1034	1466	817	455	976	955	981	1306	592	2106	791
ENSMUSG00000003955	ENSMUST00000004057;ENSMUST00000231351;ENSMUST00000231379;ENSMUST00000232390	70186	Fam162a	family with sequence similarity 162, member A [Source:MGI Symbol;Acc:MGI:1917436]	16	35864131	35891964	27834	-	751	867	929	1148	973	1411	790	721	2572	1727	730	860	713	1002	644	617	741
ENSMUSG00000003970	ENSMUST00000004072;ENSMUST00000229183;ENSMUST00000229591	26961	Rpl8	ribosomal protein L8 [Source:MGI Symbol;Acc:MGI:1350927]	15	76788278	76790514	2237	+	5581	6596	5619	7403	6249	8580	6452	7156	11897	9071	6104	6681	5111	7340.49	4239	3727	4462
ENSMUSG00000003992	ENSMUST00000004094;ENSMUST00000042122;ENSMUST00000133984;ENSMUST00000137493;ENSMUST00000137658;ENSMUST00000138488;ENSMUST00000141381;ENSMUST00000144659;ENSMUST00000156547;ENSMUST00000231481	66970	Ssbp2	single-stranded DNA binding protein 2 [Source:MGI Symbol;Acc:MGI:1914220]	13	91608402	91851548	243147	+	35	39	36	36	61	56	35	56	71	61	52	32	26	38	18	37	22
ENSMUSG00000004018	ENSMUST00000004120;ENSMUST00000109509;ENSMUST00000134445;ENSMUST00000136830;ENSMUST00000143471	67030	Fancl	Fanconi anemia, complementation group L [Source:MGI Symbol;Acc:MGI:1914280]	11	26336135	26421876	85742	+	145	179	118	237	183	228	173	188	396	301	169	130	122	141	158	181	140
ENSMUSG00000004032	ENSMUST00000004134;ENSMUST00000167387;ENSMUST00000167523;ENSMUST00000169365;ENSMUST00000170058;ENSMUST00000172247	14866	Gstm5	glutathione S-transferase, mu 5 [Source:MGI Symbol;Acc:MGI:1309466]	3	107803137	107806002	2866	+	126	149	128	174	146	194	237	214	337	219	182	199	149	182	82	179	109
ENSMUSG00000004035	ENSMUST00000004137;ENSMUST00000106687;ENSMUST00000106688;ENSMUST00000124215;ENSMUST00000133947	68312	Gstm7	glutathione S-transferase, mu 7 [Source:MGI Symbol;Acc:MGI:1915562]	3	107833650	107839133	5484	-	1299	1286	1734	1029	982	818	1327	1364	1230	976	1415	1574	1526	1688	724	1291.44	717
ENSMUSG00000004038	ENSMUST00000004136	14864	Gstm3	glutathione S-transferase, mu 3 [Source:MGI Symbol;Acc:MGI:106026]	3	107871012	107876599	5588	-	2026.2	1600.13	4708.6	1523.07	2077.14	2052.52	13340.3	3160.94	6699.78	6010.13	22316.4	4645.13	4056.05	6003.23	901.51	2780.66	1355.34
ENSMUSG00000004040	ENSMUST00000092671;ENSMUST00000103114;ENSMUST00000127638;ENSMUST00000130686;ENSMUST00000137093;ENSMUST00000137367;ENSMUST00000138438;ENSMUST00000146971;ENSMUST00000151544;ENSMUST00000152601;ENSMUST00000152623;ENSMUST00000154170;ENSMUST00000155972;ENSMUST00000156645	20848	Stat3	signal transducer and activator of transcription 3 [Source:MGI Symbol;Acc:MGI:103038]	11	100775924	100830366	54443	-	2370	2192	2409	1466	1648	1077	4179	2460	1111	624	1864	3002	1853	2724	695	1687	919
ENSMUSG00000004043	ENSMUST00000004145;ENSMUST00000107356;ENSMUST00000107357;ENSMUST00000133036;ENSMUST00000135272;ENSMUST00000138083;ENSMUST00000154087	20850	Stat5a	signal transducer and activator of transcription 5A [Source:MGI Symbol;Acc:MGI:103036]	11	100750177	100775995	25819	+	237.81	205.38	204.91	180.02	226.47	109.56	277.94	257.21	159.6	86.14	160.45	382.27	374.91	499.77	110.82	180.84	104.03
ENSMUSG00000004044	ENSMUST00000060792;ENSMUST00000132934	19285	Cavin1	caveolae associated 1 [Source:MGI Symbol;Acc:MGI:1277968]	11	100847559	100861713	14155	-	114	106	128	192	130	114	344	287	122	134	309	148	132	139	29	111	42
ENSMUSG00000004054	ENSMUST00000004156;ENSMUST00000235661;ENSMUST00000235727;ENSMUST00000235891;ENSMUST00000237032	26403	Map3k11	mitogen-activated protein kinase kinase kinase 11 [Source:MGI Symbol;Acc:MGI:1346880]	19	5738770	5752893	14124	+	922	797	950	519	596	218	986	999	368	202	772	1069	811	1113	228	509	316
ENSMUSG00000004056	ENSMUST00000051356;ENSMUST00000085917;ENSMUST00000108342;ENSMUST00000108343;ENSMUST00000108344;ENSMUST00000128540;ENSMUST00000136962;ENSMUST00000136981;ENSMUST00000138459;ENSMUST00000142365;ENSMUST00000143347;ENSMUST00000143499;ENSMUST00000147263	11652	Akt2	thymoma viral proto-oncogene 2 [Source:MGI Symbol;Acc:MGI:104874]	7	27290977	27340251	49275	+	2614.99	2706.98	2580.99	2442.99	2125	1709	2754.99	2888.99	2316.99	1643	2364	2824.99	2174	2921	1297.99	1906.94	1655.99
ENSMUSG00000004069	ENSMUST00000060067;ENSMUST00000115854;ENSMUST00000138495;ENSMUST00000144815;ENSMUST00000229529	83945	Dnaja3	DnaJ heat shock protein family (Hsp40) member A3 [Source:MGI Symbol;Acc:MGI:1933786]	16	4457853	4525559	67707	+	2658	2809	2548	2909	2204	2218	2189	2529	3069	2107	2123	2818	2371	2894	1712	2561	1918
ENSMUSG00000004070	ENSMUST00000004172;ENSMUST00000118885;ENSMUST00000120232;ENSMUST00000121529;ENSMUST00000140367;ENSMUST00000154117	15369	Hmox2	heme oxygenase 2 [Source:MGI Symbol;Acc:MGI:109373]	16	4544225	4584606	40382	+	1098	1128	1073	1255	1045	1138	1025	1424	1715	1060	987	997	802	986	706	983	802
ENSMUSG00000004071	ENSMUST00000004173;ENSMUST00000117713;ENSMUST00000118703;ENSMUST00000140187;ENSMUST00000147225;ENSMUST00000152667;ENSMUST00000229452	66626	Cdip1	cell death inducing Trp53 target 1 [Source:MGI Symbol;Acc:MGI:1913876]	16	4568212	4608156	39945	-	2161	2361	2265	1131	1038	838	1658	2022	1309	880	1708	1454	1400	1600	879	1864	1090
ENSMUSG00000004085	ENSMUST00000090824;ENSMUST00000112073;ENSMUST00000135204;ENSMUST00000135469;ENSMUST00000144111;ENSMUST00000150126	65964	Map3k20	mitogen-activated protein kinase kinase kinase 20 [Source:MGI Symbol;Acc:MGI:2443258]	2	72115981	72272954	156974	+	284	382	407	354	317	280	421	480	490	333	463	429	434	700	460	846	418
ENSMUSG00000004096	ENSMUST00000004200;ENSMUST00000213913;ENSMUST00000215143;ENSMUST00000216619	66070	Cwc15	CWC15 spliceosome-associated protein [Source:MGI Symbol;Acc:MGI:1913320]	9	14411913	14421873	9961	+	971	1045	1010	1070	882	843	1034	1151	1471	956	830	902	820	1003	526	924	658
ENSMUSG00000004098	ENSMUST00000004201;ENSMUST00000145974	53867	Col5a3	collagen, type V, alpha 3 [Source:MGI Symbol;Acc:MGI:1858212]	9	20681346	20726363	45018	-	868	725	982	679	627	288	669	877	331	128	477	603	521	841	94	407	216
ENSMUSG00000004099	ENSMUST00000004202;ENSMUST00000177754;ENSMUST00000178110;ENSMUST00000214964;ENSMUST00000215545;ENSMUST00000216135;ENSMUST00000216540	13433	Dnmt1	DNA methyltransferase 1 [Source:MGI Symbol;Acc:MGI:94912]	9	20818505	20871184	52680	-	202	162	155	192	175	151	457	789	296	133	363	260	208	268	86	203	94
ENSMUSG00000004100	ENSMUST00000004203;ENSMUST00000135608;ENSMUST00000145231;ENSMUST00000147780;ENSMUST00000153227;ENSMUST00000157047;ENSMUST00000214331	235036	Ppan	peter pan homolog [Source:MGI Symbol;Acc:MGI:2178445]	9	20799471	20803474	4004	+	263	237	235	260	192	163	388	330	334	214	372	509	248	355	180	479	230
ENSMUSG00000004105	ENSMUST00000004208;ENSMUST00000139148;ENSMUST00000143252;ENSMUST00000193373	26360	Angptl2	angiopoietin-like 2 [Source:MGI Symbol;Acc:MGI:1347002]	2	33106081	33137729	31649	+	252	280	229	155	137	72	111	318	89	48	211	219	196	331	89	316	152
ENSMUSG00000004127	ENSMUST00000040321;ENSMUST00000159481;ENSMUST00000159622;ENSMUST00000161141;ENSMUST00000161791;ENSMUST00000162864	108943	Trmt10a	tRNA methyltransferase 10A [Source:MGI Symbol;Acc:MGI:1920421]	3	137849209	137865582	16374	+	114	98	122	121	95	110	109	149	203	120	109	137	113	135	111	126	113
ENSMUSG00000004151	ENSMUST00000095767;ENSMUST00000159334;ENSMUST00000160244;ENSMUST00000160701;ENSMUST00000160856;ENSMUST00000160996;ENSMUST00000161164;ENSMUST00000161513;ENSMUST00000161591;ENSMUST00000161980;ENSMUST00000162563;ENSMUST00000162730;ENSMUST00000220492	14009	Etv1	ets variant 1 [Source:MGI Symbol;Acc:MGI:99254]	12	38829379	38920483	91105	+	15	13	13	12	18	6	16	37	21	5	18	17	12	11	6	12	11
ENSMUSG00000004187	ENSMUST00000004294;ENSMUST00000229112;ENSMUST00000229513;ENSMUST00000230124;ENSMUST00000230451;ENSMUST00000230964	16581	Kifc2	kinesin family member C2 [Source:MGI Symbol;Acc:MGI:109187]	15	76544058	76552396	8339	+	194	214	192	144	133	59	138	193	92	44	125	133	114	200	70	87	90
ENSMUSG00000004207	ENSMUST00000105465;ENSMUST00000165878;ENSMUST00000177779;ENSMUST00000179238	19156	Psap	prosaposin [Source:MGI Symbol;Acc:MGI:97783]	10	60113449	60138376	24928	+	10136	10162	10554	10111	11324	6801	24495	17621	12216	6025	18019	10663	8819	13689	4303	8821	4753
ENSMUSG00000004221	ENSMUST00000004330;ENSMUST00000064407;ENSMUST00000114127;ENSMUST00000114128;ENSMUST00000114129;ENSMUST00000114130;ENSMUST00000114133;ENSMUST00000130802;ENSMUST00000132749;ENSMUST00000135165;ENSMUST00000138564;ENSMUST00000139036;ENSMUST00000143784;ENSMUST00000144947;ENSMUST00000149525;ENSMUST00000156707;ENSMUST00000164101;ENSMUST00000180230	16151	Ikbkg	inhibitor of kappaB kinase gamma [Source:MGI Symbol;Acc:MGI:1338074]	X	73436896	73497460	60565	+	2047	1987	1900	2177	2146	1606	2348	2293	2637	1688	1825	2403	2150	2819	1483	2449	1623
ENSMUSG00000004233	ENSMUST00000004343;ENSMUST00000126875;ENSMUST00000135960;ENSMUST00000145650;ENSMUST00000198044	70560	Wars2	tryptophanyl tRNA synthetase 2 (mitochondrial) [Source:MGI Symbol;Acc:MGI:1917810]	3	99048384	99146502	98119	+	117	119	136	119	108	111	145	169	175	124	137	113	103	131	79	156	92
ENSMUSG00000004263	ENSMUST00000088357;ENSMUST00000133577;ENSMUST00000146872	13498	Atn1	atrophin 1 [Source:MGI Symbol;Acc:MGI:104725]	6	124719507	124733487	13981	-	657	541	605	329	353	95	757	1036	156	63.92	728	513	495	701	103	454	217
ENSMUSG00000004264	ENSMUST00000004375;ENSMUST00000124779;ENSMUST00000129422;ENSMUST00000130279;ENSMUST00000143000;ENSMUST00000145447;ENSMUST00000147974;ENSMUST00000150847	12034	Phb2	prohibitin 2 [Source:MGI Symbol;Acc:MGI:102520]	6	124689299	124693913	4615	+	4059	4840	4063	5331	4635	5136	4201	4449	7756	6244	4345	3868	3513	4584	3098	3210	3163
ENSMUSG00000004266	ENSMUST00000004377;ENSMUST00000112484;ENSMUST00000171549;ENSMUST00000172613;ENSMUST00000172690;ENSMUST00000172770;ENSMUST00000173228;ENSMUST00000173315;ENSMUST00000173647;ENSMUST00000174265;ENSMUST00000174787	15170	Ptpn6	protein tyrosine phosphatase, non-receptor type 6 [Source:MGI Symbol;Acc:MGI:96055]	6	124697670	124715677	18008	-	401	474	433	497	409	449	834	764	837	451	507	382	382	549	240	319	253
ENSMUSG00000004268	ENSMUST00000004379;ENSMUST00000125795;ENSMUST00000141251;ENSMUST00000142187;ENSMUST00000203238;ENSMUST00000204334	14791	Emg1	EMG1 N1-specific pseudouridine methyltransferase [Source:MGI Symbol;Acc:MGI:1315195]	6	124681048	124689141	8094	-	865	985	938	1169	1020	1495	834	899	2272	1780	781	998	771	991	676	697	716
ENSMUSG00000004270	ENSMUST00000004381;ENSMUST00000128721;ENSMUST00000130020;ENSMUST00000133797;ENSMUST00000135516;ENSMUST00000141069;ENSMUST00000141546;ENSMUST00000150597;ENSMUST00000152176	14792	Lpcat3	lysophosphatidylcholine acyltransferase 3 [Source:MGI Symbol;Acc:MGI:1315211]	6	124639990	124681381	41392	+	2410	2878	2115	2105	2111	1136	2405	3305	1667	985	3450	1979	1822	2823	1063	2454	1431
ENSMUSG00000004285	ENSMUST00000004396;ENSMUST00000143101;ENSMUST00000149646	66144	Atp6v1f	ATPase, H+ transporting, lysosomal V1 subunit F [Source:MGI Symbol;Acc:MGI:1913394]	6	29467717	29470511	2795	+	1015	1139	1003	1235	1249	1518	1122	1160	2275	1558	998	1013	690	1140	783	721	812
ENSMUSG00000004317	ENSMUST00000004428;ENSMUST00000115746;ENSMUST00000128319;ENSMUST00000132126;ENSMUST00000154382	12728	Clcn5	chloride channel, voltage-sensitive 5 [Source:MGI Symbol;Acc:MGI:99486]	X	7020049	7185597	165549	-	131	147	138	114	109	71	215	187	121	55	169	193	135	163	49	108	52
ENSMUSG00000004319	ENSMUST00000004430;ENSMUST00000056508;ENSMUST00000093490;ENSMUST00000110301;ENSMUST00000110302;ENSMUST00000129672;ENSMUST00000132234;ENSMUST00000145493;ENSMUST00000145741;ENSMUST00000147824	12725	Clcn3	chloride channel, voltage-sensitive 3 [Source:MGI Symbol;Acc:MGI:103555]	8	61363423	61436334	72912	-	949	1066	1016	1088	1053	857	1040	1239	1396	1030	1194	1465	1146	1409	769	1446	848
ENSMUSG00000004341	ENSMUST00000004453;ENSMUST00000136668	75512	Gpx6	glutathione peroxidase 6 [Source:MGI Symbol;Acc:MGI:1922762]	13	21496295	21503794	7500	+	10	24	9	15	24	9	5	9	8	14	11	13	10	22	6	17	15
ENSMUSG00000004356	ENSMUST00000004470;ENSMUST00000218967;ENSMUST00000218990;ENSMUST00000219662;ENSMUST00000220188;ENSMUST00000220275;ENSMUST00000220439	70683	Utp20	UTP20 small subunit processome component [Source:MGI Symbol;Acc:MGI:1917933]	10	88582469	88662666	80198	-	335	337	307	312	271	184	411	545	405	248	385	659	520	627	258	587	304
ENSMUSG00000004359	ENSMUST00000004473;ENSMUST00000133724;ENSMUST00000138734;ENSMUST00000144338	20728	Spic	Spi-C transcription factor (Spi-1/PU.1 related) [Source:MGI Symbol;Acc:MGI:1341168]	10	88510634	88520877	10244	-	31	17	28	94	60	117	220	142	308	212	107	21	15	28	19	14	15
ENSMUSG00000004364	ENSMUST00000163119;ENSMUST00000164108;ENSMUST00000167293;ENSMUST00000167794;ENSMUST00000168372;ENSMUST00000170897	26554	Cul3	cullin 3 [Source:MGI Symbol;Acc:MGI:1347360]	1	80242640	80318197	75558	-	1696	1797	1676	1607	1476	1304	1653	2055	2016	1425	1382	1536	1379	1671	992	2329	993
ENSMUSG00000004383	ENSMUST00000004497;ENSMUST00000119826;ENSMUST00000146249;ENSMUST00000212459	16795	Large1	LARGE xylosyl- and glucuronyltransferase 1 [Source:MGI Symbol;Acc:MGI:1342270]	8	73541227	74080168	538942	-	120	147	135	127	167	76	307	349	256	142	279	162	129	192	73	234	110
ENSMUSG00000004393	ENSMUST00000004507;ENSMUST00000139073;ENSMUST00000151446;ENSMUST00000155874	52513	Ddx56	DEAD box helicase 56 [Source:MGI Symbol;Acc:MGI:1277172]	11	6208919	6217772	8854	-	539	587	450	575	469	426	690	765	712	352	572	777	535	645	372	578	458
ENSMUSG00000004394	ENSMUST00000004508;ENSMUST00000130621;ENSMUST00000132147	103694	Tmed4	transmembrane p24 trafficking protein 4 [Source:MGI Symbol;Acc:MGI:1915070]	11	6220369	6224870	4502	-	1259	1445	1262	1525	1402	1079	1507	1693	2026	1185	1505	1465	1110	1557	890	1247	911
ENSMUSG00000004446	ENSMUST00000004560;ENSMUST00000125915;ENSMUST00000145948;ENSMUST00000160684;ENSMUST00000161594	12122	Bid	BH3 interacting domain death agonist [Source:MGI Symbol;Acc:MGI:108093]	6	120868891	120893814	24924	-	309	453	358	393	362	311	527	494	530	378	436	291	252	398	264	423	337
ENSMUSG00000004451	ENSMUST00000004565;ENSMUST00000142945;ENSMUST00000156213	64143	Ralb	v-ral simian leukemia viral oncogene B [Source:MGI Symbol;Acc:MGI:1927244]	1	119398035	119432524	34490	-	150	211	228	245	227	220	445	400	372	260	295	266	198	221	104	198	175
ENSMUSG00000004455	ENSMUST00000086294;ENSMUST00000102528;ENSMUST00000128309;ENSMUST00000132555;ENSMUST00000133568;ENSMUST00000134719;ENSMUST00000135090;ENSMUST00000142562;ENSMUST00000151184;ENSMUST00000197730	19047;434233	Ppp1cc	protein phosphatase 1 catalytic subunit gamma [Source:MGI Symbol;Acc:MGI:104872]	5	122296341	122313336	16996	+	1803.72	2015.1	1881.66	2382.15	2339.78	2466.49	2485.58	2582.29	4261.93	3201.58	2366.02	1602.74	1315.64	1841.11	1470.75	1840.54	1326.95
ENSMUSG00000004460	ENSMUST00000004574;ENSMUST00000133013;ENSMUST00000166487;ENSMUST00000178320	67838	Dnajb11	DnaJ heat shock protein family (Hsp40) member B11 [Source:MGI Symbol;Acc:MGI:1915088]	16	22676595	22698384	21790	+	2171	2308	1867	1989	1484	1498	2019	2160	1508	933	1338	3787	2679	2952	1033	1740	1208
ENSMUSG00000004462	ENSMUST00000004576;ENSMUST00000231229;ENSMUST00000231267;ENSMUST00000231513;ENSMUST00000232009;ENSMUST00000232075;ENSMUST00000232251;ENSMUST00000232345;ENSMUST00000232555;ENSMUST00000232681	70573	Tbccd1	TBCC domain containing 1 [Source:MGI Symbol;Acc:MGI:1917823]	16	22631964	22676419	44456	-	539	651	576	598	476	402	817	812	672	393	556	870	659	800	295	722	445
ENSMUSG00000004473	ENSMUST00000004587	20256	Clec11a	C-type lectin domain family 11, member a [Source:MGI Symbol;Acc:MGI:1298219]	7	43952111	43956326	4216	-	40	33	24	53	41	40	48	24	72	42	43	29	27	46	19	40	38
ENSMUSG00000004500	ENSMUST00000038701;ENSMUST00000124387;ENSMUST00000128293;ENSMUST00000210619	243834	Zfp324	zinc finger protein 324 [Source:MGI Symbol;Acc:MGI:2444641]	7	12699765	12708163	8399	+	63	62	105	103	58	52	168	132	116	43	88	286	163	137	38	140	74
ENSMUSG00000004508	ENSMUST00000004622;ENSMUST00000206791	14389	Gab2	growth factor receptor bound protein 2-associated protein 2 [Source:MGI Symbol;Acc:MGI:1333854]	7	96730793	96958153	227361	+	28	42	44	46	35	36	163	137	39	24	102	47	35	51	8	40	10
ENSMUSG00000004530	ENSMUST00000004646;ENSMUST00000111283;ENSMUST00000163264;ENSMUST00000163995;ENSMUST00000164980;ENSMUST00000166647;ENSMUST00000168399;ENSMUST00000168493;ENSMUST00000168634;ENSMUST00000171630;ENSMUST00000172016	23790	Coro1c	coronin, actin binding protein 1C [Source:MGI Symbol;Acc:MGI:1345964]	5	113980497	114046819	66323	-	495	477	488	481	447	371	893	902	578	327	736	680	442	675	248	483	277
ENSMUSG00000004535	ENSMUST00000080723;ENSMUST00000128173;ENSMUST00000129660;ENSMUST00000138040;ENSMUST00000147513;ENSMUST00000149586;ENSMUST00000149588	52440	Tax1bp1	Tax1 (human T cell leukemia virus type I) binding protein 1 [Source:MGI Symbol;Acc:MGI:1289308]	6	52690714	52743765	53052	+	3395	3692	3095	3968	3549	3200	3610	4342	5561	3357	3182	3210	2663	3641	2628	4389	2583
ENSMUSG00000004558	ENSMUST00000004673;ENSMUST00000111632;ENSMUST00000226122;ENSMUST00000226184;ENSMUST00000226364;ENSMUST00000226366;ENSMUST00000226528;ENSMUST00000226698;ENSMUST00000227237;ENSMUST00000227402;ENSMUST00000228164;ENSMUST00000228173;ENSMUST00000228620	29811	Ndrg2	N-myc downstream regulated gene 2 [Source:MGI Symbol;Acc:MGI:1352498]	14	52142728	52151615	8888	-	36532	41559	32837	43389	38121	36583	32980	36134	47839	32123	27813	28020	27021	35475	22530	30708	23589
ENSMUSG00000004561	ENSMUST00000047899;ENSMUST00000077846;ENSMUST00000163603;ENSMUST00000164252;ENSMUST00000164801;ENSMUST00000164902;ENSMUST00000165100;ENSMUST00000165150;ENSMUST00000165568;ENSMUST00000166408;ENSMUST00000167984;ENSMUST00000168217;ENSMUST00000168409;ENSMUST00000168413;ENSMUST00000169019;ENSMUST00000170887	52535	Mettl17	methyltransferase like 17 [Source:MGI Symbol;Acc:MGI:1098577]	14	52122299	52130496	8198	+	225	266	223	232	162	105	288	265	245	141	259	354	242	311	153	265	176
ENSMUSG00000004562	ENSMUST00000093813;ENSMUST00000100639;ENSMUST00000182019;ENSMUST00000182061;ENSMUST00000182193;ENSMUST00000182217;ENSMUST00000182338;ENSMUST00000182412;ENSMUST00000182480;ENSMUST00000182504;ENSMUST00000182609;ENSMUST00000182644;ENSMUST00000182649;ENSMUST00000182667;ENSMUST00000182740;ENSMUST00000182760;ENSMUST00000182777;ENSMUST00000182828;ENSMUST00000182905;ENSMUST00000182909;ENSMUST00000182931;…	268739	Arhgef40	Rho guanine nucleotide exchange factor 40 [Source:MGI Symbol;Acc:MGI:2685515]	14	52222176	52243708	21533	+	167	179	183	164	135	76	261	263	114	101	276	140	169	269	65	165	68
ENSMUSG00000004565	ENSMUST00000004681;ENSMUST00000111070;ENSMUST00000207146;ENSMUST00000207299;ENSMUST00000207317;ENSMUST00000207336;ENSMUST00000207421;ENSMUST00000207424;ENSMUST00000207430;ENSMUST00000207929;ENSMUST00000207941;ENSMUST00000208002;ENSMUST00000208006;ENSMUST00000208310;ENSMUST00000208315;ENSMUST00000208370;ENSMUST00000208691;ENSMUST00000208762;ENSMUST00000208851;ENSMUST00000208914	50767	Pnpla6	patatin-like phospholipase domain containing 6 [Source:MGI Symbol;Acc:MGI:1354723]	8	3565384	3594267	28884	+	417	438	582	318	298	142	524	453	205	135	370	829	737	838	159	405	258
ENSMUSG00000004567	ENSMUST00000004683;ENSMUST00000159538;ENSMUST00000159808;ENSMUST00000160338;ENSMUST00000161705;ENSMUST00000161842;ENSMUST00000162797;ENSMUST00000208306;ENSMUST00000208359;ENSMUST00000208739;ENSMUST00000208943	94178	Mcoln1	mucolipin 1 [Source:MGI Symbol;Acc:MGI:1890498]	8	3550457	3565232	14776	+	819	693	688	564	550	335	741	974	523	312	802	703	643	823	326	788	409
ENSMUSG00000004568	ENSMUST00000004684;ENSMUST00000098966;ENSMUST00000130587;ENSMUST00000131773;ENSMUST00000145360;ENSMUST00000145394;ENSMUST00000156085;ENSMUST00000207059;ENSMUST00000208363;ENSMUST00000208845;ENSMUST00000238786;ENSMUST00000238813;ENSMUST00000239102	102098	Arhgef18	Rho/Rac guanine nucleotide exchange factor 18 [Source:MGI Symbol;Acc:MGI:2142567]	8	3403415	3506601	103187	+	615	545	572	478	439	207	795	836	350	194	559	705	554	763	164	580	292
ENSMUSG00000004591	ENSMUST00000043812;ENSMUST00000166330;ENSMUST00000172521;ENSMUST00000172916;ENSMUST00000173615;ENSMUST00000173830;ENSMUST00000173913;ENSMUST00000174099;ENSMUST00000174169;ENSMUST00000174422;ENSMUST00000174680;ENSMUST00000197529;ENSMUST00000200315	109333	Pkn2	protein kinase N2 [Source:MGI Symbol;Acc:MGI:109211]	3	142496663	142587765	91103	-	1141	1220	1103	1386	1320	1432	1123	1478	2211	1576	998	1029	953	1111	990	1401	977
ENSMUSG00000004609	ENSMUST00000004728;ENSMUST00000039861;ENSMUST00000205503;ENSMUST00000205687;ENSMUST00000206371;ENSMUST00000206977	12489	Cd33	CD33 molecule [Source:MGI Symbol;Acc:MGI:99440]	7	43173640	43193852	20213	-	13	12	18	27	24	37	142	75	73	48	73	16	3	13	5	11	5
ENSMUSG00000004610	ENSMUST00000004729;ENSMUST00000143096;ENSMUST00000155468;ENSMUST00000205363;ENSMUST00000206196;ENSMUST00000206286;ENSMUST00000206411	110826	Etfb	electron transferring flavoprotein, beta polypeptide [Source:MGI Symbol;Acc:MGI:106098]	7	43093507	43107224	13718	+	6637	8026	6171.99	8646	7981	8206	6236	6310	12032.1	8504	6364.38	6516.38	5587.22	7804.52	5243.98	4511.85	5155
ENSMUSG00000004612	ENSMUST00000070518;ENSMUST00000206251;ENSMUST00000206741	72310	Nkg7	natural killer cell group 7 sequence [Source:MGI Symbol;Acc:MGI:1931250]	7	43086497	43087673	1177	+	7	8	7	13	11	14	13	13	25	19	14	4	9	6	3	1	2
ENSMUSG00000004626	ENSMUST00000004745;ENSMUST00000159370;ENSMUST00000159652;ENSMUST00000159888;ENSMUST00000159911;ENSMUST00000160435;ENSMUST00000160708;ENSMUST00000161629;ENSMUST00000161982;ENSMUST00000162047;ENSMUST00000162737;ENSMUST00000162832;ENSMUST00000162867;ENSMUST00000162974;ENSMUST00000163044	20911	Stxbp2	syntaxin binding protein 2 [Source:MGI Symbol;Acc:MGI:107370]	8	3680955	3693644	12690	+	685	737	673	716	585	432	857	913	729	430	779	707	610	832	354	660	490
ENSMUSG00000004631	ENSMUST00000004750;ENSMUST00000090686;ENSMUST00000101677;ENSMUST00000115577;ENSMUST00000115579;ENSMUST00000123907;ENSMUST00000126151;ENSMUST00000128109;ENSMUST00000133306;ENSMUST00000139029;ENSMUST00000153284;ENSMUST00000203556;ENSMUST00000204897	20392	Sgce	sarcoglycan, epsilon [Source:MGI Symbol;Acc:MGI:1329042]	6	4674350	4747207	72858	-	97	109	111	158	150	144	170	247	330	189	239	118	95	85	57	103	82
ENSMUSG00000004633	ENSMUST00000046856;ENSMUST00000067741;ENSMUST00000114401;ENSMUST00000114402;ENSMUST00000114403;ENSMUST00000127323;ENSMUST00000133315;ENSMUST00000138930;ENSMUST00000146114;ENSMUST00000203091;ENSMUST00000203941;ENSMUST00000204115;ENSMUST00000204410;ENSMUST00000204746;ENSMUST00000204921	69993	Chn2	chimerin 2 [Source:MGI Symbol;Acc:MGI:1917243]	6	54016539	54278795	262257	+	787	1021	689	988	717	809	638	1115	1248	868	949	749	704	818	699	1043	859
ENSMUSG00000004637	ENSMUST00000004756;ENSMUST00000109107;ENSMUST00000109108;ENSMUST00000159870;ENSMUST00000160005;ENSMUST00000160205;ENSMUST00000160862;ENSMUST00000161753;ENSMUST00000162052	80707	Wwox	WW domain-containing oxidoreductase [Source:MGI Symbol;Acc:MGI:1931237]	8	115166395	116079447	913053	+	174	207	121	165	170	103	181	201	164	98	178	148	141	136	105	204	123
ENSMUSG00000004642	ENSMUST00000057551;ENSMUST00000075670;ENSMUST00000101354;ENSMUST00000126581;ENSMUST00000139518;ENSMUST00000143029;ENSMUST00000146889;ENSMUST00000148153;ENSMUST00000151081	20492	Slbp	stem-loop binding protein [Source:MGI Symbol;Acc:MGI:108402]	5	33792296	33809918	17623	-	290	307	355	307	333	360	466	548	739	528	433	289	240	325	139	366	218
ENSMUSG00000004655	ENSMUST00000004774	11826	Aqp1	aquaporin 1 [Source:MGI Symbol;Acc:MGI:103201]	6	55313417	55325540	12124	+	1047	1243	948	1550	1381	1543	1272	1847	1248	1198	1536	1742	1298	1756	701	867	656
ENSMUSG00000004661	ENSMUST00000004780;ENSMUST00000098686;ENSMUST00000114165;ENSMUST00000164010;ENSMUST00000164035;ENSMUST00000167670;ENSMUST00000169563;ENSMUST00000170477;ENSMUST00000171444;ENSMUST00000171949	56380	Arid3b	AT-rich interaction domain 3B [Source:MGI Symbol;Acc:MGI:1930768]	9	57697636	57744076	46441	-	102	76	76	48	55	27	58	95	27	15	74	137	80	135	15	70	33
ENSMUSG00000004665	ENSMUST00000004784;ENSMUST00000105374	12798	Cnn2	calponin 2 [Source:MGI Symbol;Acc:MGI:105093]	10	79824418	79831896	7479	+	92	84	98	155	165	156	334	292	208	137	235	181	132	146	58	56	46
ENSMUSG00000004667	ENSMUST00000004786;ENSMUST00000131743;ENSMUST00000143438;ENSMUST00000147507;ENSMUST00000152843	66420	Polr2e	polymerase (RNA) II (DNA directed) polypeptide E [Source:MGI Symbol;Acc:MGI:1913670]	10	79871783	79875629	3847	-	466	548	537	913	688	1075	728	743	1951	1437	759	593	436	696	501	399	589
ENSMUSG00000004677	ENSMUST00000168839;ENSMUST00000170242;ENSMUST00000212412;ENSMUST00000240722	17925	Myo9b	myosin IXb [Source:MGI Symbol;Acc:MGI:106624]	8	71725358	71813357	88000	+	543	492	615	454	424	242	1054	1022	415	243	1013	804	505	838	237	775	354
ENSMUSG00000004698	ENSMUST00000110819;ENSMUST00000209463;ENSMUST00000209667;ENSMUST00000209750;ENSMUST00000209902;ENSMUST00000209990;ENSMUST00000210724;ENSMUST00000211107;ENSMUST00000211632;ENSMUST00000211752;ENSMUST00000239321;ENSMUST00000239340	79221	Hdac9	histone deacetylase 9 [Source:MGI Symbol;Acc:MGI:1931221]	12	34097579	34967094	869516	-	12	14	25	29	22	31	59	85	69	42	38	8	2	11	10	13	9
ENSMUSG00000004707	ENSMUST00000004827;ENSMUST00000068878;ENSMUST00000111277;ENSMUST00000143463;ENSMUST00000146596	17085	Ly9	lymphocyte antigen 9 [Source:MGI Symbol;Acc:MGI:96885]	1	171416192	171434978	18787	-	32	17	24	48	70	80	194	114	126	87	96	17	11	15	6	8	8
ENSMUSG00000004709	ENSMUST00000004829;ENSMUST00000194170;ENSMUST00000194797;ENSMUST00000195804	18106	Cd244a	CD244 molecule A [Source:MGI Symbol;Acc:MGI:109294]	1	171386761	171437314	50554	+	2	1	1	3	7	6	21	31	28	10	16	3	3	3	2	3	0
ENSMUSG00000004730	ENSMUST00000004850;ENSMUST00000086763;ENSMUST00000232808;ENSMUST00000233376;ENSMUST00000233840	13733	Adgre1	adhesion G protein-coupled receptor E1 [Source:MGI Symbol;Acc:MGI:106912]	17	57665691	57790527	124837	+	151	171	173	319	259	389	766	860	689	361	445	207	113	215	64	99	74
ENSMUSG00000004748	ENSMUST00000004868;ENSMUST00000123607	67900	Mtfp1	mitochondrial fission process 1 [Source:MGI Symbol;Acc:MGI:1916686]	11	4041480	4045445	3966	-	523	547	465	645	514	695	382	434	870	712	468	547	553	578	334	395	362
ENSMUSG00000004768	ENSMUST00000088287;ENSMUST00000115174;ENSMUST00000122822;ENSMUST00000132066;ENSMUST00000135330;ENSMUST00000138024;ENSMUST00000140354;ENSMUST00000150593;ENSMUST00000151482;ENSMUST00000195006	19335	Rab23	RAB23, member RAS oncogene family [Source:MGI Symbol;Acc:MGI:99833]	1	33758968	33781645	22678	+	145	233	151	159	153	151	201	273	225	102	191	176	216	241	119	218	163
ENSMUSG00000004771	ENSMUST00000004892;ENSMUST00000165083;ENSMUST00000166857;ENSMUST00000167569;ENSMUST00000168366;ENSMUST00000169058;ENSMUST00000171100;ENSMUST00000172298;ENSMUST00000172444	53869	Rab11a	RAB11A, member RAS oncogene family [Source:MGI Symbol;Acc:MGI:1858202]	9	64622581	64645040	22460	-	1293.02	1441.22	1332	2035.07	1799	2534	1592	1821	4485.77	3015	1366	1353.09	1084	1373	1256	1614	1253
ENSMUSG00000004788	ENSMUST00000004910;ENSMUST00000128709;ENSMUST00000130760;ENSMUST00000136495;ENSMUST00000140900;ENSMUST00000150935;ENSMUST00000151925	217715	Eif2b2	eukaryotic translation initiation factor 2B, subunit 2 beta [Source:MGI Symbol;Acc:MGI:2145118]	12	85266255	85273402	7148	+	371	380	361	455	385	350	426	474	580	347	336	439	387	493	280	352	243
ENSMUSG00000004789	ENSMUST00000053811;ENSMUST00000220559;ENSMUST00000220633;ENSMUST00000221288;ENSMUST00000221357;ENSMUST00000221842;ENSMUST00000222472;ENSMUST00000222998;ENSMUST00000223332;ENSMUST00000223409;ENSMUST00000223413;ENSMUST00000223415;ENSMUST00000223438	78920	Dlst	dihydrolipoamide S-succinyltransferase [Source:MGI Symbol;Acc:MGI:1926170]	12	85157607	85181619	24013	+	4972	5505	4847	5576	4607	3950	4630	5373	5458	3621	4914	4883	4482	5627	3182	5377	3558
ENSMUSG00000004798	ENSMUST00000004920;ENSMUST00000129025;ENSMUST00000157049	29869	Ulk2	unc-51 like kinase 2 [Source:MGI Symbol;Acc:MGI:1352758]	11	61666475	61745899	79425	-	2238	1868	1803	1580	1489	940	1593	2327	1373	758	1559	1922	1675	2400	769	2096	1168
ENSMUSG00000004814	ENSMUST00000004936;ENSMUST00000201401	56221	Ccl24	C-C motif chemokine ligand 24 [Source:MGI Symbol;Acc:MGI:1928953]	5	135598791	135601903	3113	-	25	23	22	24	26	46	41	131	157	51	35	32	16	33	14	10	16
ENSMUSG00000004815	ENSMUST00000053913;ENSMUST00000123669;ENSMUST00000132179;ENSMUST00000132708;ENSMUST00000139169;ENSMUST00000139598;ENSMUST00000144624;ENSMUST00000145917;ENSMUST00000153238;ENSMUST00000153365;ENSMUST00000156964	110524	Dgkq	diacylglycerol kinase, theta [Source:MGI Symbol;Acc:MGI:102918]	5	108794559	108817538	22980	-	598	571	597	669	480	429	516	722	525	338	477	562	558	747	363	714	506
ENSMUSG00000004837	ENSMUST00000004959;ENSMUST00000155380	71520	Grap	GRB2-related adaptor protein [Source:MGI Symbol;Acc:MGI:1918770]	11	61544091	61563610	19520	+	43	65	50	61	50	61	63	91	73	43	73	52	45	48	27	32	34
ENSMUSG00000004843	ENSMUST00000004965;ENSMUST00000231259	68942	Chmp2b	charged multivesicular body protein 2B [Source:MGI Symbol;Acc:MGI:1916192]	16	65336014	65359612	23599	-	553	662	673	925	888	1099	1041	983	2123	1521	881	1141	790	891	580	853	640
ENSMUSG00000004846	ENSMUST00000004968;ENSMUST00000127100;ENSMUST00000129896;ENSMUST00000137419;ENSMUST00000144784;ENSMUST00000151642	26433	Plod3	procollagen-lysine, 2-oxoglutarate 5-dioxygenase 3 [Source:MGI Symbol;Acc:MGI:1347008]	5	137015873	137025502	9630	+	597	516	576	371	336	180	697	739	271	135	585	780	468	700	184	452	247
ENSMUSG00000004849	ENSMUST00000111080;ENSMUST00000129356;ENSMUST00000144303;ENSMUST00000150603;ENSMUST00000154183	11769	Ap1s1	adaptor protein complex AP-1, sigma 1 [Source:MGI Symbol;Acc:MGI:1098244]	5	137063847	137074989	11143	-	583	654	611	651	706	538	1023	949	1030	751	1026	648	514	631	343	475	427
ENSMUSG00000004864	ENSMUST00000004986;ENSMUST00000124099;ENSMUST00000129096;ENSMUST00000133786;ENSMUST00000233051;ENSMUST00000233109;ENSMUST00000233460;ENSMUST00000233676;ENSMUST00000233984	26415	Mapk13	mitogen-activated protein kinase 13 [Source:MGI Symbol;Acc:MGI:1346864]	17	28988271	28999207	10937	+	1	2	2	5	1	6	19	9	10	6	10	4	5	6	4	9	1
ENSMUSG00000004865	ENSMUST00000004987;ENSMUST00000114767;ENSMUST00000126683;ENSMUST00000130643;ENSMUST00000136504;ENSMUST00000145023;ENSMUST00000145730;ENSMUST00000232751;ENSMUST00000232882;ENSMUST00000233129;ENSMUST00000233353;ENSMUST00000233440;ENSMUST00000233794	20815	Srpk1	serine/arginine-rich protein specific kinase 1 [Source:MGI Symbol;Acc:MGI:106908]	17	28806622	28841683	35062	-	511	437	494	503	472	398	627	776	716	475	498	696	520	625	310	605	315
ENSMUSG00000004880	ENSMUST00000005003;ENSMUST00000191878;ENSMUST00000192075;ENSMUST00000193028;ENSMUST00000193030;ENSMUST00000194302;ENSMUST00000194415;ENSMUST00000195299	98386	Lbr	lamin B receptor [Source:MGI Symbol;Acc:MGI:2138281]	1	181642900	181670611	27712	-	169	209	209	241	187	337	330	459	682	443	276	243	197	189	130	215	182
ENSMUSG00000004891	ENSMUST00000090973;ENSMUST00000159830;ENSMUST00000160694	18008	Nes	nestin [Source:MGI Symbol;Acc:MGI:101784]	3	87878385	87887758	9374	+	46	41	41	51	50	41	127	111	30	33	132	89	57	82	11	51	14
ENSMUSG00000004895	ENSMUST00000005015	94315	Prcc	papillary renal cell carcinoma (translocation-associated) [Source:MGI Symbol;Acc:MGI:2137738]	3	87766210	87792915	26706	-	475	445	486	473	462	360	509	584	486	358	479	524	412	513	248	411	270
ENSMUSG00000004896	ENSMUST00000005016;ENSMUST00000159091;ENSMUST00000159831;ENSMUST00000159967;ENSMUST00000160068;ENSMUST00000160074;ENSMUST00000160143;ENSMUST00000160648;ENSMUST00000161014;ENSMUST00000161471;ENSMUST00000164439;ENSMUST00000168070	229503	Mettl25b	methyltransferase like 25B [Source:MGI Symbol;Acc:MGI:2387197]	3	87829908	87838024	8117	-	193	222	199	138	152	118	258	258	170	96	229	244	182	250	94	235	139
ENSMUSG00000004897	ENSMUST00000005017;ENSMUST00000159492;ENSMUST00000160198;ENSMUST00000160312;ENSMUST00000161616;ENSMUST00000162631;ENSMUST00000249431	15191	Hdgf	heparin binding growth factor [Source:MGI Symbol;Acc:MGI:1194494]	3	87813628	87823439	9812	+	3745	3915	3824	2947	2718	1948	4425	5756	3986	2628	3865	4009	3497	4250	1871	3283	2422
ENSMUSG00000004929	ENSMUST00000005057;ENSMUST00000166015;ENSMUST00000166404;ENSMUST00000167658;ENSMUST00000171484	50492	Thop1	thimet oligopeptidase 1 [Source:MGI Symbol;Acc:MGI:1354165]	10	80905869	80918393	12525	+	180	197	193	187	140	112	249	272	156	111	245	255	181	263	78	167	120
ENSMUSG00000004931	ENSMUST00000057798;ENSMUST00000217688;ENSMUST00000217754;ENSMUST00000218146;ENSMUST00000218297;ENSMUST00000218742;ENSMUST00000219294;ENSMUST00000219304;ENSMUST00000219460;ENSMUST00000219919;ENSMUST00000220297	57267	Apba3	amyloid beta precursor protein binding family A member 3 [Source:MGI Symbol;Acc:MGI:1888527]	10	81102794	81109080	6287	+	690	625	715	519	471	209	654	620	342	210	546	989	696	1083	243	411	314
ENSMUSG00000004934	ENSMUST00000005064;ENSMUST00000129549;ENSMUST00000134017;ENSMUST00000135765;ENSMUST00000147436	59004	Pias4	protein inhibitor of activated STAT 4 [Source:MGI Symbol;Acc:MGI:2136940]	10	80989100	81003757	14658	-	336	355	373	289	246	113	361	441	190	106	328	302	303	386	132	249	181
ENSMUSG00000004936	ENSMUST00000005066;ENSMUST00000147796;ENSMUST00000152535;ENSMUST00000152675	26395	Map2k1	mitogen-activated protein kinase kinase 1 [Source:MGI Symbol;Acc:MGI:1346866]	9	64093052	64160913	67862	-	1097	1086	1023	954	907	629	1186	1445	1022	614	985	1161	988	1248	464	950	566
ENSMUSG00000004937	ENSMUST00000005067;ENSMUST00000218208;ENSMUST00000219126;ENSMUST00000219297;ENSMUST00000219401;ENSMUST00000220202;ENSMUST00000220317	52551	Sgta	small glutamine-rich tetratricopeptide repeat (TPR)-containing, alpha [Source:MGI Symbol;Acc:MGI:1098703]	10	80879909	80896015	16107	-	1377	1339	1345	1310	1199	882	1459	1579	1394	1018	1419	1489	1213	1668	615	950	733
ENSMUSG00000004945	ENSMUST00000005053;ENSMUST00000185896;ENSMUST00000188282	70544	Tmem242	transmembrane protein 242 [Source:MGI Symbol;Acc:MGI:1917794]	17	5461145	5490534	29390	-	650	809	613	1081	1013	1424	753	898	2285	1614	727	657	572	764	639	723	830
ENSMUSG00000004947	ENSMUST00000005072;ENSMUST00000111142;ENSMUST00000111144;ENSMUST00000111145;ENSMUST00000125827;ENSMUST00000130345;ENSMUST00000140146;ENSMUST00000142041;ENSMUST00000199239	74198	Dtx2	deltex 2, E3 ubiquitin ligase [Source:MGI Symbol;Acc:MGI:1921448]	5	136023654	136061726	38073	+	131	94	121	66	59	29	116	130	43	35	103	125	91	128	25	74	58
ENSMUSG00000004951	ENSMUST00000005077;ENSMUST00000111155	15507	Hspb1	heat shock protein 1 [Source:MGI Symbol;Acc:MGI:96240]	5	135916773	135918417	1645	+	424	340.47	234	366	310	218	350.34	288.44	283.38	133	229	330.63	289.45	420	80	139	107.49
ENSMUSG00000004952	ENSMUST00000042135;ENSMUST00000100570;ENSMUST00000122887;ENSMUST00000125048;ENSMUST00000125247;ENSMUST00000130598;ENSMUST00000131353;ENSMUST00000134509;ENSMUST00000135344;ENSMUST00000140972;ENSMUST00000145294;ENSMUST00000152723;ENSMUST00000199502	54153	Rasa4	RAS p21 protein activator 4 [Source:MGI Symbol;Acc:MGI:1858600]	5	136112770	136140714	27945	+	31	25	24	34	38	22	178	97	45	38	113	30	13	19	10	17	13
ENSMUSG00000004980	ENSMUST00000069949;ENSMUST00000114459;ENSMUST00000203220;ENSMUST00000203253;ENSMUST00000203655;ENSMUST00000203954;ENSMUST00000204090;ENSMUST00000204158;ENSMUST00000204188;ENSMUST00000204885;ENSMUST00000204902;ENSMUST00000205204;ENSMUST00000249940	53379	Hnrnpa2b1	heterogeneous nuclear ribonucleoprotein A2/B1 [Source:MGI Symbol;Acc:MGI:104819]	6	51437912	51446874	8963	-	7098	7202	7268	5750	4854	3884	7504	8593	5497	3560	6731	6901	6352	7374	3058	6966	3265
ENSMUSG00000004994	ENSMUST00000005120;ENSMUST00000098578;ENSMUST00000163993;ENSMUST00000164476;ENSMUST00000166285;ENSMUST00000166728;ENSMUST00000172320	67736	Yju2b	YJU2 splicing factor homolog B [Source:MGI Symbol;Acc:MGI:1914986]	8	84984424	84997009	12586	-	50	79	83	83	67	61	96	121	125	73	75	129	89	114	65	89	45
ENSMUSG00000004996	ENSMUST00000005122;ENSMUST00000125498;ENSMUST00000126435;ENSMUST00000127747;ENSMUST00000140850	67873	Mri1	methylthioribose-1-phosphate isomerase 1 [Source:MGI Symbol;Acc:MGI:1915123]	8	84976535	84983955	7421	-	396	515	355	496	353	370	394	478	544	351	458	498	395	529	263	422	361
ENSMUSG00000005034	ENSMUST00000005164;ENSMUST00000102515;ENSMUST00000106137;ENSMUST00000106138;ENSMUST00000144369;ENSMUST00000196344;ENSMUST00000197616;ENSMUST00000199722	18749	Prkacb	protein kinase, cAMP dependent, catalytic, beta [Source:MGI Symbol;Acc:MGI:97594]	3	146435329	146518745	83417	-	1103	1236	1059	1076	1091	853	1255	1574	1249	799	1097	1105	1097	1374	685	1490	823
ENSMUSG00000005043	ENSMUST00000005173;ENSMUST00000100172;ENSMUST00000126132;ENSMUST00000133507;ENSMUST00000136523;ENSMUST00000141540	27029	Sgsh	N-sulfoglucosamine sulfohydrolase (sulfamidase) [Source:MGI Symbol;Acc:MGI:1350341]	11	119234251	119246362	12112	-	138	116	158	167	95	84	237	197	96	37	224	268	159	250	62	156	75
ENSMUSG00000005054	ENSMUST00000005185	13014	Cstb	cystatin B [Source:MGI Symbol;Acc:MGI:109514]	10	78261503	78263456	1954	+	618	763	645	1093	1145	1988	1513	943	3489	2484	1427	644	531	666	638	581	743
ENSMUSG00000005057	ENSMUST00000005188;ENSMUST00000196245;ENSMUST00000196397;ENSMUST00000196447;ENSMUST00000197324	23921	Sh2b2	SH2B adaptor protein 2 [Source:MGI Symbol;Acc:MGI:1345171]	5	136247001	136275410	28410	-	65	36	54	25	16	22	90	71	32	19	52	40	27	36	17	47	47
ENSMUSG00000005069	ENSMUST00000035861;ENSMUST00000080557;ENSMUST00000112530;ENSMUST00000112531;ENSMUST00000112532;ENSMUST00000150812;ENSMUST00000150899;ENSMUST00000156415	19305	Pex5	peroxisomal biogenesis factor 5 [Source:MGI Symbol;Acc:MGI:1098808]	6	124373775	124392026	18252	-	2955	3092	2920	2683	2278	1449	2656	3081	2040	1213	2394	2973	2725	3600	1244	2071	1494
ENSMUSG00000005078	ENSMUST00000057257;ENSMUST00000117449;ENSMUST00000125764;ENSMUST00000132371;ENSMUST00000134041;ENSMUST00000145752;ENSMUST00000152381	104771	Jkamp	JNK1/MAPK8-associated membrane protein [Source:MGI Symbol;Acc:MGI:1915057]	12	72132363	72148235	15873	+	366	401	376	508	439	530	402	418	888	627	386	375	326	442	362	438	386
ENSMUSG00000005087	ENSMUST00000005218;ENSMUST00000060516;ENSMUST00000099673;ENSMUST00000111190;ENSMUST00000111191;ENSMUST00000111192;ENSMUST00000111194;ENSMUST00000111198;ENSMUST00000124624	12505	Cd44	CD44 antigen [Source:MGI Symbol;Acc:MGI:88338]	2	102641486	102732010	90525	-	92	116	106	225	206	299	531	619	608	274	317	85	63	92	52	55	40
ENSMUSG00000005089	ENSMUST00000005220;ENSMUST00000080210;ENSMUST00000111212;ENSMUST00000111213;ENSMUST00000123759;ENSMUST00000125085;ENSMUST00000128622;ENSMUST00000136221;ENSMUST00000136488;ENSMUST00000137466;ENSMUST00000145921;ENSMUST00000154446	20511	Slc1a2	solute carrier family 1 (glial high affinity glutamate transporter), member 2 [Source:MGI Symbol;Acc:MGI:101931]	2	102489004	102621129	132126	+	3075	2535	2689	2082	2220	1191	1704	2662	1180	756	1209	1339	1508	1805	1209	2372	1088
ENSMUSG00000005102	ENSMUST00000005233;ENSMUST00000102527;ENSMUST00000110869;ENSMUST00000110870;ENSMUST00000110872;ENSMUST00000110874;ENSMUST00000110877;ENSMUST00000125281	27103	Eif2ak4	eukaryotic translation initiation factor 2 alpha kinase 4 [Source:MGI Symbol;Acc:MGI:1353427]	2	118219099	118305715	86617	+	176	210	185	168	165	125	210	231	157	118	229	213	211	214	90	238	129
ENSMUSG00000005103	ENSMUST00000005234;ENSMUST00000200909;ENSMUST00000201059;ENSMUST00000201150;ENSMUST00000201260;ENSMUST00000201330;ENSMUST00000201456;ENSMUST00000201538;ENSMUST00000202199;ENSMUST00000202496;ENSMUST00000202766	22388	Wdr1	WD repeat domain 1 [Source:MGI Symbol;Acc:MGI:1337100]	5	38684156	38720564	36409	-	754	806	792	832	724	570	1477	1433	994	562	1053	1035	759	974	487	927	564
ENSMUSG00000005107	ENSMUST00000005238;ENSMUST00000067872;ENSMUST00000067886;ENSMUST00000122970;ENSMUST00000129099;ENSMUST00000140462;ENSMUST00000143758;ENSMUST00000144290;ENSMUST00000147664;ENSMUST00000155634;ENSMUST00000156076;ENSMUST00000156272	117591	Slc2a9	solute carrier family 2 (facilitated glucose transporter), member 9 [Source:MGI Symbol;Acc:MGI:2152844]	5	38506616	38660486	153871	-	1164	1497	1224	1178	1018	641	1451	1707	1028	673	1893	1137	1214	1658	773	1894	903
ENSMUSG00000005124	ENSMUST00000005255;ENSMUST00000118823;ENSMUST00000133863;ENSMUST00000147079;ENSMUST00000229246;ENSMUST00000230535	22402	Ccn4	cellular communication network factor 4 [Source:MGI Symbol;Acc:MGI:1197008]	15	66763169	66795050	31882	+	30	28	22	29	34	24	59	62	25	23	39	44	30	46	19	21	10
ENSMUSG00000005125	ENSMUST00000005256;ENSMUST00000163496;ENSMUST00000164070;ENSMUST00000164675;ENSMUST00000165966;ENSMUST00000166420;ENSMUST00000167817;ENSMUST00000168542;ENSMUST00000168979;ENSMUST00000170903;ENSMUST00000171266;ENSMUST00000171569;ENSMUST00000172447	17988	Ndrg1	N-myc downstream regulated gene 1 [Source:MGI Symbol;Acc:MGI:1341799]	15	66801167	66841489	40323	-	208	246	435	255	257	204	363	234	245	203	287	604	672	786	72	113	76
ENSMUSG00000005142	ENSMUST00000034121;ENSMUST00000209264;ENSMUST00000209361;ENSMUST00000210991;ENSMUST00000211223;ENSMUST00000211379	17159	Man2b1	mannosidase 2, alpha B1 [Source:MGI Symbol;Acc:MGI:107286]	8	85809899	85824911	15013	+	2930	3348	3005	2483	2342	1282	4031	4555	1894	1272	4019	2856	2370	3321	1120	2919	1476
ENSMUSG00000005150	ENSMUST00000093357;ENSMUST00000131909;ENSMUST00000135463;ENSMUST00000136696;ENSMUST00000142201;ENSMUST00000145880;ENSMUST00000146900;ENSMUST00000149050;ENSMUST00000152186;ENSMUST00000152785	67836	Wdr83	WD repeat domain containing 83 [Source:MGI Symbol;Acc:MGI:1915086]	8	85801664	85807935	6272	-	341	332	340	328	233	201	363	400	267	162	327	426	330	439	162	309	199
ENSMUSG00000005161	ENSMUST00000005292;ENSMUST00000109733;ENSMUST00000109734;ENSMUST00000125893;ENSMUST00000127215;ENSMUST00000138748;ENSMUST00000143402;ENSMUST00000164807	21672	Prdx2	peroxiredoxin 2 [Source:MGI Symbol;Acc:MGI:109486]	8	85696216	85701463	5248	+	2037	2601	2231	3374	2905	4476	2884	2831	7459	5311	2952	2137	1928	2561	2114	2147	2235
ENSMUSG00000005198	ENSMUST00000058470;ENSMUST00000071213;ENSMUST00000151586;ENSMUST00000156588	20020	Polr2a	polymerase (RNA) II (DNA directed) polypeptide A [Source:MGI Symbol;Acc:MGI:98086]	11	69624823	69649463	24641	-	1024	775	967	479	485	101	1226	1450	301	121	1155	1338	962	1490	186	1075	346
ENSMUSG00000005204	ENSMUST00000005336;ENSMUST00000066760;ENSMUST00000123084;ENSMUST00000128355;ENSMUST00000130440;ENSMUST00000134942;ENSMUST00000135372;ENSMUST00000142206;ENSMUST00000153516	80886	Senp3	SUMO/sentrin specific peptidase 3 [Source:MGI Symbol;Acc:MGI:2158736]	11	69563941	69572910	8970	-	639	647	675	768	678	633	766	943.99	1033	761	649	795	589	731	490	665	522
ENSMUSG00000005220	ENSMUST00000005352;ENSMUST00000167460;ENSMUST00000175766;ENSMUST00000176320;ENSMUST00000176439;ENSMUST00000176974;ENSMUST00000177290	53419	Corin	corin, serine peptidase [Source:MGI Symbol;Acc:MGI:1349451]	5	72457368	72661816	204449	-	1	1	4	1	3	1	16	8	6	3	5	3	1	2	1	0	1
ENSMUSG00000005225	ENSMUST00000101385;ENSMUST00000119706	231999	Plekha8	pleckstrin homology domain containing, family A (phosphoinositide binding specific) member 8 [Source:MGI Symbol;Acc:MGI:2681164]	6	54572096	54622824	50729	+	652.88	688	734.43	800	739	644	827	886.42	1081.95	768	900.56	744.28	589.43	688.72	457	1009	623.56
ENSMUSG00000005233	ENSMUST00000005365;ENSMUST00000112320;ENSMUST00000126638;ENSMUST00000127243;ENSMUST00000149045;ENSMUST00000149401;ENSMUST00000149643;ENSMUST00000150505;ENSMUST00000167875	66442	Spc25	SPC25, NDC80 kinetochore complex component, homolog (S. cerevisiae) [Source:MGI Symbol;Acc:MGI:1913692]	2	69024239	69036538	12300	-	116	90	127	134	221	160	329	558	851	675	366	78	69	103	121	118	133
ENSMUSG00000005251	ENSMUST00000019386	72388	Ripk4	receptor-interacting serine-threonine kinase 4 [Source:MGI Symbol;Acc:MGI:1919638]	16	97543133	97564987	21855	-	177	144	187	170	180	141	317	310	345	232	290	188	134	169	115	204	123
ENSMUSG00000005262	ENSMUST00000005394;ENSMUST00000115578;ENSMUST00000163695;ENSMUST00000164795;ENSMUST00000166352;ENSMUST00000168822;ENSMUST00000170325;ENSMUST00000171789;ENSMUST00000172013;ENSMUST00000172451;ENSMUST00000232311	22230	Ufd1	ubiquitin recognition factor in ER-associated degradation 1 [Source:MGI Symbol;Acc:MGI:109353]	16	18630529	18654011	23483	+	712	795	669	914	841	834	857	942	1464	796	658	917	706	902	547	706	568
ENSMUSG00000005267	ENSMUST00000005399;ENSMUST00000127732;ENSMUST00000128370;ENSMUST00000149228;ENSMUST00000150336;ENSMUST00000185656	170740	Zfp287	zinc finger protein 287 [Source:MGI Symbol;Acc:MGI:2176561]	11	62591182	62622731	31550	-	2	5	9	3	6	3	7	16	6	3	6	6	7	5	1	2	1
ENSMUSG00000005268	ENSMUST00000005400;ENSMUST00000124470;ENSMUST00000127467;ENSMUST00000128450;ENSMUST00000128921;ENSMUST00000130720;ENSMUST00000132361;ENSMUST00000134410;ENSMUST00000137867;ENSMUST00000138135;ENSMUST00000145428;ENSMUST00000148257	19116	Prlr	prolactin receptor [Source:MGI Symbol;Acc:MGI:97763]	15	10177324	10349266	171943	+	2721	2304	3655	1378	2009	1250	2244	1884	1022	722	1799	3399.94	2973	3774.97	813	2054.97	955
ENSMUSG00000005299	ENSMUST00000005431;ENSMUST00000144071;ENSMUST00000148451;ENSMUST00000149886;ENSMUST00000200827;ENSMUST00000201981	56384	Letm1	leucine zipper-EF-hand containing transmembrane protein 1 [Source:MGI Symbol;Acc:MGI:1932557]	5	33897017	33940161	43145	-	2053	1942	1862	1604	1273	727	1276	1727	1035	561	1225	2114	2004	2592	816	2156	1000
ENSMUSG00000005312	ENSMUST00000058735;ENSMUST00000076454;ENSMUST00000225645;ENSMUST00000225818	56085	Ubqln1	ubiquilin 1 [Source:MGI Symbol;Acc:MGI:1860276]	13	58323970	58363467	39498	-	3800	3964	3268	3554	2890	2351	3230	4124	3193	1993	2888	5511	4862	5908	1948	4130	2278
ENSMUSG00000005320	ENSMUST00000005452;ENSMUST00000162167;ENSMUST00000162967	14186	Fgfr4	fibroblast growth factor receptor 4 [Source:MGI Symbol;Acc:MGI:95525]	13	55300453	55316572	16120	+	981	834	1199	759	744	405	1312	1008	500	371	1059	1173	945	1291	360	767	435
ENSMUSG00000005338	ENSMUST00000005470;ENSMUST00000111220;ENSMUST00000126963;ENSMUST00000136540;ENSMUST00000157032	94332	Cadm3	cell adhesion molecule 3 [Source:MGI Symbol;Acc:MGI:2137858]	1	173160825	173195261	34437	-	80	107.87	94	73	35	43	38	129	33	19	42	112	76	111	33	73	54
ENSMUSG00000005354	ENSMUST00000005487;ENSMUST00000100486;ENSMUST00000109747;ENSMUST00000109748;ENSMUST00000173561;ENSMUST00000173631;ENSMUST00000174529	56551	Txn2	thioredoxin 2 [Source:MGI Symbol;Acc:MGI:1929468]	15	77799247	77813206	13960	-	3470	3837	3804	3553	3290	2771	3857	3571	3970	3067	3636	3866	3197	4363	1848	3107	2386
ENSMUSG00000005362	ENSMUST00000013882;ENSMUST00000113239;ENSMUST00000147087;ENSMUST00000151484;ENSMUST00000204230	58799	Crbn	cereblon [Source:MGI Symbol;Acc:MGI:1913277]	6	106757162	106777038	19877	-	547	596	582	874	780	864	635	807	1518	1160	579	499	482	665	618	771	583
ENSMUSG00000005370	ENSMUST00000005503;ENSMUST00000234756;ENSMUST00000234936	17688	Msh6	mutS homolog 6 [Source:MGI Symbol;Acc:MGI:1343961]	17	88282490	88298320	15831	+	252	247	319	281	197	174	370	496	346	177	375	361	251	415	146	313	159
ENSMUSG00000005371	ENSMUST00000005504;ENSMUST00000127334;ENSMUST00000130379;ENSMUST00000135639;ENSMUST00000235056;ENSMUST00000235112	225055	Fbxo11	F-box protein 11 [Source:MGI Symbol;Acc:MGI:2147134]	17	88298287	88372719	74433	-	579	681	637	597	566	491	569	776	728	549	538	631	496	636	327	763	403
ENSMUSG00000005373	ENSMUST00000005507;ENSMUST00000123370;ENSMUST00000128691;ENSMUST00000129008;ENSMUST00000141770;ENSMUST00000142385;ENSMUST00000153519;ENSMUST00000154840;ENSMUST00000201977;ENSMUST00000202431	58805	Mlxipl	MLX interacting protein-like [Source:MGI Symbol;Acc:MGI:1927999]	5	135118744	135167236	48493	+	8808	8697	6628	5896	5083	3499	5010	8439	3589	1769	3554	7726	7350	9423	2304	7777	4627
ENSMUSG00000005374	ENSMUST00000005508;ENSMUST00000139565;ENSMUST00000152013;ENSMUST00000153183;ENSMUST00000201780	27368	Tbl2	transducin (beta)-like 2 [Source:MGI Symbol;Acc:MGI:1351652]	5	135178511	135194614	16104	+	379	350	386	331	326	187	599	580	363	253	535	548	346	486	200	531	260
ENSMUSG00000005378	ENSMUST00000071677;ENSMUST00000085984;ENSMUST00000111205;ENSMUST00000129013;ENSMUST00000129691;ENSMUST00000134180;ENSMUST00000141309;ENSMUST00000141765;ENSMUST00000144891;ENSMUST00000147756;ENSMUST00000148549;ENSMUST00000149108;ENSMUST00000151551;ENSMUST00000201554;ENSMUST00000202478	66138	Bud23	BUD23, rRNA methyltransferase and ribosome maturation factor [Source:MGI Symbol;Acc:MGI:1913388]	5	135081811	135093813	12003	-	506	456	478	514	478	443	414	511	636	460	460	592	459	609	283	310	380
ENSMUSG00000005397	ENSMUST00000005532;ENSMUST00000222142;ENSMUST00000222436	18073	Nid1	nidogen 1 [Source:MGI Symbol;Acc:MGI:97342]	13	13612136	13686854	74719	+	212	200	299	305	305	292	2227.98	2142.97	812	606	2210	485	260	342.81	97	359	139
ENSMUSG00000005410	ENSMUST00000164309;ENSMUST00000211912;ENSMUST00000212426;ENSMUST00000212648;ENSMUST00000212811	17218	Mcm5	minichromosome maintenance complex component 5 [Source:MGI Symbol;Acc:MGI:103197]	8	75836197	75855067	18871	+	49	36	52	77	87	65	372	765	436	210	473	39	26	28	17	27	22
ENSMUSG00000005413	ENSMUST00000005548;ENSMUST00000159631	15368	Hmox1	heme oxygenase 1 [Source:MGI Symbol;Acc:MGI:96163]	8	75820249	75827217	6969	+	329	237	412	404	532	443	1593	959	1079	649	742	446	219	412	157	138	110
ENSMUSG00000005417	ENSMUST00000066330;ENSMUST00000072031;ENSMUST00000108751;ENSMUST00000116371;ENSMUST00000132620;ENSMUST00000133861;ENSMUST00000138234;ENSMUST00000153531;ENSMUST00000156111	26936	Mprip	myosin phosphatase Rho interacting protein [Source:MGI Symbol;Acc:MGI:1349438]	11	59552131	59671686	119556	+	2618.96	2587.28	2488.43	2491.72	2186.54	1500	2932.14	4107	2510.53	1402.38	2817.14	2822.95	2338.84	3181.95	1282.24	2264.62	1742.28
ENSMUSG00000005442	ENSMUST00000005578;ENSMUST00000163320;ENSMUST00000163819;ENSMUST00000163901;ENSMUST00000164440;ENSMUST00000164820;ENSMUST00000165239;ENSMUST00000165742;ENSMUST00000167162;ENSMUST00000167379;ENSMUST00000168956;ENSMUST00000169266;ENSMUST00000169392;ENSMUST00000169743;ENSMUST00000170500	71722	Cic	capicua transcriptional repressor [Source:MGI Symbol;Acc:MGI:1918972]	7	24967129	24993584	26456	+	595	533	610	303	295	133	944	959	188	92	608	931	630	822	101	391	211
ENSMUSG00000005447	ENSMUST00000005583;ENSMUST00000108410;ENSMUST00000140093;ENSMUST00000148150;ENSMUST00000148828;ENSMUST00000149634;ENSMUST00000155118	18476	Pafah1b3	platelet-activating factor acetylhydrolase, isoform 1b, subunit 3 [Source:MGI Symbol;Acc:MGI:108414]	7	24994474	24997411	2938	-	52	59	64	53	61	95	100	87	197	132	92	58	31	55	40	24	36
ENSMUSG00000005465	ENSMUST00000005601;ENSMUST00000210245;ENSMUST00000210790	50931	Il27ra	interleukin 27 receptor, alpha [Source:MGI Symbol;Acc:MGI:1355318]	8	84756923	84769218	12296	-	13	18	22	28	18	11	36	49	16	15	29	23	15	21	6	15	14
ENSMUSG00000005469	ENSMUST00000005606;ENSMUST00000211558	18747	Prkaca	protein kinase, cAMP dependent, catalytic, alpha [Source:MGI Symbol;Acc:MGI:97592]	8	84699622	84723072	23451	+	1212	1279	1222	1178	992	541	1440	1555	854	530	1319	1438	1366	1717	507	929	669
ENSMUSG00000005470	ENSMUST00000005607;ENSMUST00000124174;ENSMUST00000124913	66929	Asf1b	anti-silencing function 1B histone chaperone [Source:MGI Symbol;Acc:MGI:1914179]	8	84682136	84696826	14691	+	3	2	11	12	15	14	77	153	79	49	65	2	8	6	1	3	2
ENSMUSG00000005481	ENSMUST00000019576;ENSMUST00000109810;ENSMUST00000127505;ENSMUST00000138789;ENSMUST00000140521;ENSMUST00000172396;ENSMUST00000212949	68278	Ddx39a	DEAD box helicase 39a [Source:MGI Symbol;Acc:MGI:1915528]	8	84441806	84453521	11716	+	274	312	293	373	260	328	436	572	761	430	491	433	293	393	239	406	304
ENSMUSG00000005483	ENSMUST00000005620;ENSMUST00000212300	81489	Dnajb1	DnaJ heat shock protein family (Hsp40) member B1 [Source:MGI Symbol;Acc:MGI:1931874]	8	84334822	84339282	4461	+	504	576	567	448	480	511	573	629	742	555	514	665	427	554	346	442	321
ENSMUSG00000005501	ENSMUST00000040783;ENSMUST00000186315;ENSMUST00000186670;ENSMUST00000187758;ENSMUST00000187871;ENSMUST00000188332;ENSMUST00000189409;ENSMUST00000189586;ENSMUST00000190446	227334	Usp40	ubiquitin specific peptidase 40 [Source:MGI Symbol;Acc:MGI:2443184]	1	87872841	87936273	63433	-	680	704	589	736	645	593	684	832	751	569	694	791	650	834	439	795	544
ENSMUSG00000005505	ENSMUST00000090682;ENSMUST00000111464;ENSMUST00000124284;ENSMUST00000140945;ENSMUST00000155372	67136	Kbtbd4	kelch repeat and BTB (POZ) domain containing 4 [Source:MGI Symbol;Acc:MGI:1914386]	2	90735084	90741970	6887	+	335	337	352	391	357	274	384	405	376	272	305	453	313	418	238	416	201
ENSMUSG00000005506	ENSMUST00000005643;ENSMUST00000068726;ENSMUST00000068747;ENSMUST00000111448;ENSMUST00000111449;ENSMUST00000111451;ENSMUST00000111452;ENSMUST00000111455;ENSMUST00000127385;ENSMUST00000127580;ENSMUST00000133657;ENSMUST00000150546;ENSMUST00000154442;ENSMUST00000177642	13046	Celf1	CUGBP, Elav-like family member 1 [Source:MGI Symbol;Acc:MGI:1342295]	2	90770727	90849842	79116	+	2176	2152	2082	1672	1388	804	2137	2607	1291	759	2043	2228	1772	2330	1084	2642	1406
ENSMUSG00000005510	ENSMUST00000005647;ENSMUST00000123426;ENSMUST00000139400;ENSMUST00000140248;ENSMUST00000144683;ENSMUST00000152059	68349	Ndufs3	NADH:ubiquinone oxidoreductase core subunit S3 [Source:MGI Symbol;Acc:MGI:1915599]	2	90724978	90735171	10194	-	2751.99	3218.97	2725.99	3132.99	2916.98	2508	2548.98	2963.99	4324.98	2917.99	2606	2328.98	2324	3019.97	1702.98	2462.96	2144.07
ENSMUSG00000005514	ENSMUST00000005651;ENSMUST00000122113;ENSMUST00000127096;ENSMUST00000132084;ENSMUST00000147515;ENSMUST00000149684;ENSMUST00000150058;ENSMUST00000153500;ENSMUST00000153515	18984	Por	cytochrome p450 oxidoreductase [Source:MGI Symbol;Acc:MGI:97744]	5	135698887	135764180	65294	+	9375	9686	8960	5805	7288	5933	13629	9627	8478	8147	16183	3498	2369	3334	3331	7320	4102
ENSMUSG00000005533	ENSMUST00000005671;ENSMUST00000207487;ENSMUST00000207621;ENSMUST00000208348;ENSMUST00000208731;ENSMUST00000208871	16001	Igf1r	insulin-like growth factor I receptor [Source:MGI Symbol;Acc:MGI:96433]	7	67602575	67883416	280842	+	35	26	47	29	37	14	64	62	25	17	43	39	28	32	9	48	20
ENSMUSG00000005534	ENSMUST00000091291;ENSMUST00000139504;ENSMUST00000207100;ENSMUST00000207295;ENSMUST00000208839	16337	Insr	insulin receptor [Source:MGI Symbol;Acc:MGI:96575]	8	3172061	3329617	157557	-	3505	3659	3367	2622	2367	1915	3524	4096	2326	1674	3461	3019	2775	4027	1554	4571	1971
ENSMUSG00000005547	ENSMUST00000005685;ENSMUST00000165641;ENSMUST00000168869;ENSMUST00000169007;ENSMUST00000170631	13087	Cyp2a5	cytochrome P450, family 2, subfamily a, polypeptide 5 [Source:MGI Symbol;Acc:MGI:88597]	7	26534730	26542973	8244	+	13515	22428.9	16403.5	17752.6	22584	17744.5	22614	19840.2	35616.1	25086.9	29889.3	9220.91	15042.7	24957	18816.5	26699.9	15835.8
ENSMUSG00000005553	ENSMUST00000005692;ENSMUST00000165410;ENSMUST00000167761;ENSMUST00000170371;ENSMUST00000171014	11944	Atp4a	ATPase, H+/K+ exchanging, gastric, alpha polypeptide [Source:MGI Symbol;Acc:MGI:88113]	7	30411634	30424959	13326	+	38	30	197	28	15	24	71	27	20	40	62	33	15	17	6	9	7
ENSMUSG00000005566	ENSMUST00000005705;ENSMUST00000123603;ENSMUST00000123778;ENSMUST00000125136;ENSMUST00000128951;ENSMUST00000129122;ENSMUST00000142421;ENSMUST00000148354;ENSMUST00000149061;ENSMUST00000209577	21849	Trim28	tripartite motif-containing 28 [Source:MGI Symbol;Acc:MGI:109274]	7	12733041	12764962	31922	+	1386	1386	1376	1119	1157	619	1937	2240	1282	807	1691	1628	1122	1510	646	1565	748
ENSMUSG00000005575	ENSMUST00000005714;ENSMUST00000123541;ENSMUST00000125964;ENSMUST00000126827;ENSMUST00000131837;ENSMUST00000138357;ENSMUST00000156389;ENSMUST00000165394	22192	Ube2m	ubiquitin-conjugating enzyme E2M [Source:MGI Symbol;Acc:MGI:108278]	7	12769047	12772202	3156	-	828	894	898	660	680	419	1035	1172	854	473	938	942	745	947	329	724	467
ENSMUSG00000005580	ENSMUST00000005719;ENSMUST00000117801;ENSMUST00000120080	11515	Adcy9	adenylate cyclase 9 [Source:MGI Symbol;Acc:MGI:108450]	16	4105393	4238362	132970	-	499	485	537	362	286	138	307	484	192	86	424	347	310	572	204	562	247
ENSMUSG00000005583	ENSMUST00000005722;ENSMUST00000163888;ENSMUST00000185052;ENSMUST00000195904;ENSMUST00000195984;ENSMUST00000196207;ENSMUST00000196493;ENSMUST00000196730;ENSMUST00000196832;ENSMUST00000197022;ENSMUST00000197145;ENSMUST00000197146;ENSMUST00000197681;ENSMUST00000197722;ENSMUST00000197938;ENSMUST00000198064;ENSMUST00000198069;ENSMUST00000198199;ENSMUST00000198217;ENSMUST00000198360;ENSMUST00000198916;…	17260	Mef2c	myocyte enhancer factor 2C [Source:MGI Symbol;Acc:MGI:99458]	13	83652153	83815199	163047	+	34	36	47	74	55	51	100	106	94	76	101	28	37	48	34	49	20
ENSMUSG00000005609	ENSMUST00000005749;ENSMUST00000123681;ENSMUST00000140220;ENSMUST00000143818;ENSMUST00000146558;ENSMUST00000146709;ENSMUST00000152019;ENSMUST00000157025;ENSMUST00000209912	22083	Ctr9	CTR9 homolog, Paf1/RNA polymerase II complex component [Source:MGI Symbol;Acc:MGI:109345]	7	110628158	110655584	27427	+	565	519	537	564	488	355	729	848	589	329	575	672	487	685	268	586	297
ENSMUSG00000005610	ENSMUST00000159305;ENSMUST00000159465;ENSMUST00000160132;ENSMUST00000160552;ENSMUST00000160966;ENSMUST00000161051;ENSMUST00000161079;ENSMUST00000161158;ENSMUST00000161682;ENSMUST00000161736;ENSMUST00000161790;ENSMUST00000162394;ENSMUST00000162415;ENSMUST00000163014	13690	Eif4g2	eukaryotic translation initiation factor 4, gamma 2 [Source:MGI Symbol;Acc:MGI:109207]	7	110666957	110682237	15281	-	11729	12373	12270	11802	10923	9003	12600	14824	15426	10913	11266	12808	11276	13980	8224	15321	9305
ENSMUSG00000005611	ENSMUST00000005751;ENSMUST00000125758;ENSMUST00000127935;ENSMUST00000135590;ENSMUST00000142368;ENSMUST00000149923;ENSMUST00000154466	17540	Irag1	inositol 1,4,5-triphosphate receptor associated 1 [Source:MGI Symbol;Acc:MGI:1338023]	7	110467473	110581668	114196	-	32	19	38	36	28	12	37	47	12	17	51	43	31	34	6	32	11
ENSMUSG00000005615	ENSMUST00000079791;ENSMUST00000104893;ENSMUST00000115137;ENSMUST00000115140;ENSMUST00000123199;ENSMUST00000141421;ENSMUST00000141772;ENSMUST00000231920	13026	Pcyt1a	phosphate cytidylyltransferase 1, choline, alpha isoform [Source:MGI Symbol;Acc:MGI:88557]	16	32249739	32293888	44150	+	1946	2139	1745	2040	1894	1371	2639	3329	2123	1501	2410	2134	1792	2488	1072	2614	1385
ENSMUSG00000005621	ENSMUST00000107353;ENSMUST00000125137;ENSMUST00000149508;ENSMUST00000176477	233410	Zfp592	zinc finger protein 592 [Source:MGI Symbol;Acc:MGI:2443541]	7	80643429	80694912	51484	+	861	801	776	473	456	184	725	996	273	145	690	735	601	830	209	702	324
ENSMUSG00000005625	ENSMUST00000071664;ENSMUST00000107237;ENSMUST00000117355;ENSMUST00000136868;ENSMUST00000140280;ENSMUST00000140348;ENSMUST00000143688;ENSMUST00000147960	19185	Psmd4	proteasome (prosome, macropain) 26S subunit, non-ATPase, 4 [Source:MGI Symbol;Acc:MGI:1201670]	3	94940005	94949925	9921	-	2070	2209	1915	2444	2105	1961	2070	2326	2732	1778	1788	2258	1870	2601	1266	1503	1213
ENSMUSG00000005656	ENSMUST00000005798;ENSMUST00000218066;ENSMUST00000218337;ENSMUST00000218934;ENSMUST00000219302;ENSMUST00000219722;ENSMUST00000219781;ENSMUST00000219865	72183	Snx6	sorting nexin 6 [Source:MGI Symbol;Acc:MGI:1919433]	12	54793134	54842488	49355	-	239	305	383	418	332	363	619	595	665	445	457	397	291	364	206	381	249
ENSMUSG00000005667	ENSMUST00000005810;ENSMUST00000139802;ENSMUST00000141044;ENSMUST00000141193;ENSMUST00000203375;ENSMUST00000203847;ENSMUST00000204472	17768	Mthfd2	methylenetetrahydrofolate dehydrogenase (NAD+ dependent), methenyltetrahydrofolate cyclohydrolase [Source:MGI Symbol;Acc:MGI:1338850]	6	83282673	83302890	20218	-	36	26	32	24	22	22	70	117	63	44	61	59	21	24	9	17	9
ENSMUSG00000005672	ENSMUST00000005815;ENSMUST00000136002;ENSMUST00000143221;ENSMUST00000144270;ENSMUST00000148993;ENSMUST00000151357;ENSMUST00000201240;ENSMUST00000202167	16590	Kit	KIT proto-oncogene receptor tyrosine kinase [Source:MGI Symbol;Acc:MGI:96677]	5	75735576	75817382	81807	+	82	90	60	85	86	83	122	121	80	65	107	153	120	135	48	79	62
ENSMUSG00000005674	ENSMUST00000005817;ENSMUST00000111326;ENSMUST00000111327;ENSMUST00000130529;ENSMUST00000138184;ENSMUST00000143405;ENSMUST00000147246;ENSMUST00000154106	641376	Tomm40l	translocase of outer mitochondrial membrane 40-like [Source:MGI Symbol;Acc:MGI:3589112]	1	171043580	171050083	6504	-	454	398	374	643	505	668	524	500	961	766	447	332	297	428	256	187	303
ENSMUSG00000005677	ENSMUST00000005820;ENSMUST00000075469;ENSMUST00000111328;ENSMUST00000133075;ENSMUST00000137298;ENSMUST00000149404;ENSMUST00000152865;ENSMUST00000155126	12355	Nr1i3	nuclear receptor subfamily 1, group I, member 3 [Source:MGI Symbol;Acc:MGI:1346307]	1	171041539	171048270	6732	+	4461	5202	1891	3188	3603	2379	2503	4598	4061	2133	2061	3701	3949	5310	4216	4570	3875
ENSMUSG00000005681	ENSMUST00000005824;ENSMUST00000111319;ENSMUST00000111320;ENSMUST00000111321	11807	Apoa2	apolipoprotein A-II [Source:MGI Symbol;Acc:MGI:88050]	1	171052623	171053948	1326	+	126541	162731	107682	132603	110011	150277	59243	96868	181220	121748	60959	97242	93626	133620	73106	81974	77286
ENSMUSG00000005682	ENSMUST00000005825;ENSMUST00000218137;ENSMUST00000218315;ENSMUST00000218496;ENSMUST00000219255;ENSMUST00000219721;ENSMUST00000219801	103135	Pan2	PAN2 poly(A) specific ribonuclease subunit [Source:MGI Symbol;Acc:MGI:1918984]	10	128139204	128157227	18024	+	615	557	661	482	431	271	574	802	363	272	685	765	689	797	315	692	400
ENSMUSG00000005683	ENSMUST00000005826;ENSMUST00000218159	12974	Cs	citrate synthase [Source:MGI Symbol;Acc:MGI:88529]	10	128173603	128198348	24746	+	2599	2568	2183	2656	2184	1636	1943	2890	2065	1176	1980	3118	3160	3387	1457	2245	1408
ENSMUSG00000005686	ENSMUST00000005829;ENSMUST00000106686;ENSMUST00000143786;ENSMUST00000147587;ENSMUST00000148292;ENSMUST00000170374;ENSMUST00000176487;ENSMUST00000213373	11717	Ampd3	adenosine monophosphate deaminase 3 [Source:MGI Symbol;Acc:MGI:1096344]	7	110367413	110411612	44200	+	11	16	11	11	15	27	50	50	32	23	29	12	11	31	4	17	6
ENSMUSG00000005687	ENSMUST00000005830;ENSMUST00000135017;ENSMUST00000136937;ENSMUST00000139489;ENSMUST00000147042;ENSMUST00000155520	68183	Bcas2	BCAS2 pre-mRNA processing factor [Source:MGI Symbol;Acc:MGI:1915433]	3	103078971	103086482	7512	+	594	629	637	876	745	921	694	774	1591	1259	708	602	527	680	475	633	494
ENSMUSG00000005698	ENSMUST00000005841;ENSMUST00000128510;ENSMUST00000129388;ENSMUST00000132679;ENSMUST00000137735;ENSMUST00000156436	13018	Ctcf	CCCTC-binding factor [Source:MGI Symbol;Acc:MGI:109447]	8	106363200	106409554	46355	+	636	708	721	735	695	689	675	793	1054	760	589	712	613	763	402	796	438
ENSMUSG00000005699	ENSMUST00000093195;ENSMUST00000098444;ENSMUST00000211888;ENSMUST00000212352;ENSMUST00000212430;ENSMUST00000212634;ENSMUST00000212972	56513	Pard6a	par-6 family cell polarity regulator alpha [Source:MGI Symbol;Acc:MGI:1927223]	8	106427780	106430128	2349	+	47	59	53	66	46	57	51	48	77	58	46	61	54	61	44	33	32
ENSMUSG00000005718	ENSMUST00000005862;ENSMUST00000229956;ENSMUST00000230875	83383	Tfap4	transcription factor AP4 [Source:MGI Symbol;Acc:MGI:103239]	16	4362525	4377718	15194	-	57	71	50	81	83	47	95	133	98	50	86	74	72	99	44	59	64
ENSMUSG00000005732	ENSMUST00000052325;ENSMUST00000115645;ENSMUST00000123073;ENSMUST00000134035	19385	Ranbp1	RAN binding protein 1 [Source:MGI Symbol;Acc:MGI:96269]	16	18057648	18066596	8949	-	391	459	436	452	391	399	584	758	803	495	541	562	371	473	237	424	309
ENSMUSG00000005774	ENSMUST00000029772;ENSMUST00000107253;ENSMUST00000107254;ENSMUST00000107255;ENSMUST00000107260;ENSMUST00000132393;ENSMUST00000137088;ENSMUST00000140294;ENSMUST00000140331;ENSMUST00000142311;ENSMUST00000142708;ENSMUST00000144132;ENSMUST00000145031;ENSMUST00000145472;ENSMUST00000147237;ENSMUST00000148803;ENSMUST00000152869	53970	Rfx5	regulatory factor X, 5 (influences HLA class II expression) [Source:MGI Symbol;Acc:MGI:1858421]	3	94861386	94868872	7487	+	219	237	195	210	176	75	361	314	124	74	256	425	240	356	82	179	114
ENSMUSG00000005779	ENSMUST00000005923;ENSMUST00000133412;ENSMUST00000134133;ENSMUST00000136143;ENSMUST00000200513	19172	Psmb4	proteasome (prosome, macropain) subunit, beta type 4 [Source:MGI Symbol;Acc:MGI:1098257]	3	94791404	94794272	2869	-	2571	2666	2468	3593	3031	4047	2817	2914	5782	3977	2727	2811	2293	3153	2160	2274	2320
ENSMUSG00000005802	ENSMUST00000005952;ENSMUST00000099457	22785	Slc30a4	solute carrier family 30 (zinc transporter), member 4 [Source:MGI Symbol;Acc:MGI:1345282]	2	122523153	122544583	21431	-	315	317	374	461	463	539	556	529	1063	700	430	363	304	398	337	522	331
ENSMUSG00000005803	ENSMUST00000005953;ENSMUST00000110506;ENSMUST00000124460;ENSMUST00000126403;ENSMUST00000141698;ENSMUST00000147310;ENSMUST00000147475;ENSMUST00000176343;ENSMUST00000176999	59010	Sqor	sulfide quinone oxidoreductase [Source:MGI Symbol;Acc:MGI:1929899]	2	122607157	122651489	44333	+	4032	5296	4679	4651	4723	3934	7649	6775	7401	5030	6523	4414	3940	5077	2763	5418	3427
ENSMUSG00000005804	ENSMUST00000005954;ENSMUST00000127595;ENSMUST00000129690;ENSMUST00000145037;ENSMUST00000146449;ENSMUST00000148460	18457	Bloc1s6	biogenesis of lysosomal organelles complex-1, subunit 6, pallidin [Source:MGI Symbol;Acc:MGI:1927580]	2	122580423	122591395	10973	+	280	340	313	406	337	304	398	458	539	349	332	346	299	397	207	360	299
ENSMUSG00000005813	ENSMUST00000029804;ENSMUST00000195910;ENSMUST00000197531;ENSMUST00000198492;ENSMUST00000198700;ENSMUST00000199303;ENSMUST00000200365	75624	Metap1	methionyl aminopeptidase 1 [Source:MGI Symbol;Acc:MGI:1922874]	3	138164717	138195276	30560	-	750	774	724	850	722	604	891	983	967	686	721	951	693	954	563	1092	610
ENSMUSG00000005823	ENSMUST00000005975;ENSMUST00000232778;ENSMUST00000233492;ENSMUST00000233568	78308	Gpr108	G protein-coupled receptor 108 [Source:MGI Symbol;Acc:MGI:1925558]	17	57541635	57555446	13812	-	516	572	423	556	464	328	423	628	441	224	370	569	554	727	262	535	339
ENSMUSG00000005824	ENSMUST00000005976	50930	Tnfsf14	tumor necrosis factor (ligand) superfamily, member 14 [Source:MGI Symbol;Acc:MGI:1355317]	17	57496492	57501177	4686	-	4	1	1	1	6	7	8	8	6	6	6	4	3	4	0	0	3
ENSMUSG00000005836	ENSMUST00000047762;ENSMUST00000231831;ENSMUST00000234512;ENSMUST00000234722;ENSMUST00000234971;ENSMUST00000235081	14465	Gata6	GATA binding protein 6 [Source:MGI Symbol;Acc:MGI:107516]	18	11052064	11085635	33572	+	154	109	184	144	137	87	216	171	141	102	188	242	155	159	40	96	71
ENSMUSG00000005846	ENSMUST00000119953;ENSMUST00000124454;ENSMUST00000129962;ENSMUST00000230002;ENSMUST00000230232	66409	Rsl1d1	ribosomal L1 domain containing 1 [Source:MGI Symbol;Acc:MGI:1913659]	16	11010834	11021195	10362	-	740	841	706	1179	1005	1254	995	1138	2353	1643	839	1035	765	871	818	1185	820
ENSMUSG00000005871	ENSMUST00000066133;ENSMUST00000079362;ENSMUST00000115781;ENSMUST00000163295;ENSMUST00000165590;ENSMUST00000167136;ENSMUST00000170023;ENSMUST00000170195;ENSMUST00000171187	11789	Apc	APC, WNT signaling pathway regulator [Source:MGI Symbol;Acc:MGI:88039]	18	34353977	34455605	101629	+	894	738	932	462	452	240	946	1091	371	237	795	870	724	985	250	1267	361
ENSMUSG00000005873	ENSMUST00000006027;ENSMUST00000235153;ENSMUST00000235227;ENSMUST00000236887;ENSMUST00000237414	13476	Reep5	receptor accessory protein 5 [Source:MGI Symbol;Acc:MGI:1270152]	18	34477938	34507123	29186	-	381	399	300	499	397	653	631	578	1028	530	508	468	264	428	215	341	347
ENSMUSG00000005881	ENSMUST00000006035;ENSMUST00000088650;ENSMUST00000130793;ENSMUST00000137545;ENSMUST00000142859;ENSMUST00000144707;ENSMUST00000149381;ENSMUST00000150970;ENSMUST00000152568;ENSMUST00000155370	66366	Ergic3	ERGIC and golgi 3 [Source:MGI Symbol;Acc:MGI:1913616]	2	155849965	155860199	10235	+	1799	1846	1719	2038	1899	2319	1820	1742	3142	2255	1614	1669	1433	2090	1254	1241	1293
ENSMUSG00000005882	ENSMUST00000006036;ENSMUST00000109631;ENSMUST00000109632;ENSMUST00000109636;ENSMUST00000123790;ENSMUST00000133726;ENSMUST00000136933;ENSMUST00000139232;ENSMUST00000141501;ENSMUST00000142655;ENSMUST00000146995;ENSMUST00000151078;ENSMUST00000152766;ENSMUST00000152818;ENSMUST00000155680;ENSMUST00000159238;ENSMUST00000161484;ENSMUST00000162258;ENSMUST00000162749	56046	Uqcc1	ubiquinol-cytochrome c reductase complex assembly factor 1 [Source:MGI Symbol;Acc:MGI:1929472]	2	155688814	155772230	83417	-	870	995	883	1294	1014	1231	967	1091	2027	1316	1005	859	788	994	709	977	789
ENSMUSG00000005886	ENSMUST00000006037;ENSMUST00000068304;ENSMUST00000081713;ENSMUST00000124088;ENSMUST00000133232;ENSMUST00000139970;ENSMUST00000143603;ENSMUST00000145280;ENSMUST00000146784;ENSMUST00000147927;ENSMUST00000185275	17978	Ncoa2	nuclear receptor coactivator 2 [Source:MGI Symbol;Acc:MGI:1276533]	1	13209329	13444307	234979	-	1378	1283	1296	836	779	480	1240	1514	635	426	1127	1075	995	1471	454	1692	697
ENSMUSG00000005893	ENSMUST00000113460;ENSMUST00000113463;ENSMUST00000133133;ENSMUST00000133321;ENSMUST00000146175;ENSMUST00000204349;ENSMUST00000204497;ENSMUST00000204661	22026	Nr2c2	nuclear receptor subfamily 2, group C, member 2 [Source:MGI Symbol;Acc:MGI:1352466]	6	92068371	92151275	82905	+	830	738	780	661	736	585	801	996	666	549	702	608	536	749	452	835	528
ENSMUSG00000005897	ENSMUST00000092213;ENSMUST00000099343;ENSMUST00000105290	22025	Nr2c1	nuclear receptor subfamily 2, group C, member 1 [Source:MGI Symbol;Acc:MGI:1352465]	10	93983885	94033073	49189	+	469	399	333	302	308	296	309	367	348	246	288	330	296	388	271	374	245
ENSMUSG00000005899	ENSMUST00000006053;ENSMUST00000090159;ENSMUST00000163476;ENSMUST00000165363;ENSMUST00000231257;ENSMUST00000231311;ENSMUST00000231378;ENSMUST00000231436;ENSMUST00000231627;ENSMUST00000231722;ENSMUST00000231736;ENSMUST00000231792;ENSMUST00000231887;ENSMUST00000231949;ENSMUST00000232021;ENSMUST00000232043;ENSMUST00000232116;ENSMUST00000232185;ENSMUST00000232270;ENSMUST00000232271;ENSMUST00000232417;…	77626	Smpd4	sphingomyelin phosphodiesterase 4 [Source:MGI Symbol;Acc:MGI:1924876]	16	17437218	17462692	25475	+	300	344	293	244	234	151	364	482	249	103	292	377	257	404	116	330	151
ENSMUSG00000005907	ENSMUST00000006061;ENSMUST00000121291;ENSMUST00000123268;ENSMUST00000126545;ENSMUST00000142516;ENSMUST00000143132;ENSMUST00000143959;ENSMUST00000195894;ENSMUST00000196124;ENSMUST00000196432;ENSMUST00000196692;ENSMUST00000197167;ENSMUST00000199035;ENSMUST00000199213	71382	Pex1	peroxisomal biogenesis factor 1 [Source:MGI Symbol;Acc:MGI:1918632]	5	3646066	3687232	41167	+	509	586	420	567	549	316	567	586	503	335	567	666	570	818	343	719	380
ENSMUSG00000005936	ENSMUST00000057174;ENSMUST00000117672;ENSMUST00000118762;ENSMUST00000122163;ENSMUST00000150858;ENSMUST00000153462;ENSMUST00000153831;ENSMUST00000168507;ENSMUST00000232729;ENSMUST00000232772;ENSMUST00000232874;ENSMUST00000232980;ENSMUST00000233064;ENSMUST00000233145;ENSMUST00000233197;ENSMUST00000233334;ENSMUST00000233847	66989	Kctd20	potassium channel tetramerisation domain containing 20 [Source:MGI Symbol;Acc:MGI:1914239]	17	29170924	29188523	17600	+	856	924	851	1045	919	789	1119	1342	1086	683	910	993	752	1069	522	1006	657
ENSMUSG00000005949	ENSMUST00000006103;ENSMUST00000108476;ENSMUST00000130101;ENSMUST00000144658;ENSMUST00000150468	83429	Ctns	cystinosis, nephropathic [Source:MGI Symbol;Acc:MGI:1932872]	11	73074422	73089868	15447	-	397	412	440	256	289	168	444	439	250	182	421	350	311	363	141	353	213
ENSMUSG00000005950	ENSMUST00000006104;ENSMUST00000135202;ENSMUST00000136894	94045	P2rx5	purinergic receptor P2X, ligand-gated ion channel, 5 [Source:MGI Symbol;Acc:MGI:2137026]	11	73051247	73063511	12265	+	1	1	0	1	2	1	6	12	14	2	2	3	5	1	0	1	2
ENSMUSG00000005951	ENSMUST00000006105;ENSMUST00000131927	74637	Shpk	sedoheptulokinase [Source:MGI Symbol;Acc:MGI:1921887]	11	73090286	73115337	25052	+	1375	1865	1402	1811	1437	1328	1381	1795	1553	1043	1329	1176	1273	1701	989	1871	1201
ENSMUSG00000005958	ENSMUST00000006112;ENSMUST00000159575;ENSMUST00000160053;ENSMUST00000161063;ENSMUST00000231316;ENSMUST00000232407	13845	Ephb3	Eph receptor B3 [Source:MGI Symbol;Acc:MGI:104770]	16	21023505	21042055	18551	+	6	9	5	16	7	6	12	16	2	2	8	4	6	7	5	6	4
ENSMUSG00000005968	ENSMUST00000006123;ENSMUST00000196496;ENSMUST00000196655;ENSMUST00000196733;ENSMUST00000198456;ENSMUST00000200407	22156	Tuft1	tuftelin 1 [Source:MGI Symbol;Acc:MGI:109572]	3	94520064	94566179	46116	-	139	109	127	152	127	127	576	486	548	229	378	277	156	187	237	415	254
ENSMUSG00000005973	ENSMUST00000006128;ENSMUST00000127019	19672	Rcn1	reticulocalbin 1 [Source:MGI Symbol;Acc:MGI:104559]	2	105216636	105229664	13029	-	86	105	76	136	127	153	242	234	197	147	257	113	112	107	51	80	47
ENSMUSG00000005980	ENSMUST00000006136;ENSMUST00000120009;ENSMUST00000125961;ENSMUST00000132466;ENSMUST00000137748;ENSMUST00000144792;ENSMUST00000149670;ENSMUST00000157044;ENSMUST00000175755;ENSMUST00000176642;ENSMUST00000177337	13419	Dnase1	deoxyribonuclease I [Source:MGI Symbol;Acc:MGI:103157]	16	3854806	3857888	3083	+	6	6	2	13	27	5	12	4	17	9	17	1	3	5	11	5	2
ENSMUSG00000005981	ENSMUST00000006137;ENSMUST00000137945;ENSMUST00000138594;ENSMUST00000150354	68015	Trap1	TNF receptor-associated protein 1 [Source:MGI Symbol;Acc:MGI:1915265]	16	3857835	3895691	37857	-	3869	4468	3854	4399	3914	2542	4179	5042	4189	2530	4143	3781	3535	4578	2244	4286	2633
ENSMUSG00000005982	ENSMUST00000115860;ENSMUST00000135093;ENSMUST00000140832;ENSMUST00000143537;ENSMUST00000147949;ENSMUST00000150655;ENSMUST00000151988;ENSMUST00000175809;ENSMUST00000176224;ENSMUST00000176625;ENSMUST00000186375	74763	Naa60	N(alpha)-acetyltransferase 60, NatF catalytic subunit [Source:MGI Symbol;Acc:MGI:1922013]	16	3690239	3722634	32396	+	2310.35	2223.91	1929.99	1697.03	1785.6	855.96	2173.93	2712.43	1381.08	782.24	1962.18	2083.69	1859.71	2526.99	967.48	2465.97	1280.64
ENSMUSG00000005983	ENSMUST00000006139;ENSMUST00000115859;ENSMUST00000123235;ENSMUST00000177221;ENSMUST00000177323;ENSMUST00000177519	73261;105246059	1700037C18Rik	RIKEN cDNA 1700037C18 gene [Source:MGI Symbol;Acc:MGI:1920511]	16	3713043	3726553	13511	-	13	17	13	14	9	19	15	16	22	13	11	9	8	13	4	3	10
ENSMUSG00000005986	ENSMUST00000056888;ENSMUST00000163858;ENSMUST00000166031;ENSMUST00000167215;ENSMUST00000169653;ENSMUST00000170283	68423	Ankrd13d	ankyrin repeat domain 13 family, member D [Source:MGI Symbol;Acc:MGI:1915673]	19	4320208	4333165	12958	-	3	3	10	4	2	2	11	16	8	2	6	3	4	2	2	0	1
ENSMUSG00000006005	ENSMUST00000119161;ENSMUST00000124484;ENSMUST00000124973;ENSMUST00000128417;ENSMUST00000130779;ENSMUST00000131701;ENSMUST00000132257;ENSMUST00000132522;ENSMUST00000138718;ENSMUST00000141827;ENSMUST00000147769;ENSMUST00000150752;ENSMUST00000151563;ENSMUST00000152967	108989	Tpr	translocated promoter region, nuclear basket protein [Source:MGI Symbol;Acc:MGI:1922066]	1	150268589	150325686	57098	+	1266	1214	1287	1016	1004	662	1898	2264	1136	713	1829	1554	1141	1517	494	1987	561
ENSMUSG00000006010	ENSMUST00000006167;ENSMUST00000094477;ENSMUST00000097546;ENSMUST00000097547;ENSMUST00000111913;ENSMUST00000132809;ENSMUST00000140112;ENSMUST00000148389;ENSMUST00000150615	226499	Odr4	odr4 GPCR localization factor homolog [Source:MGI Symbol;Acc:MGI:2385108]	1	150237056	150268831	31776	-	780	929	787	1151	983	1060	889	1170	1792	1051	861	906	783	986	680	1151	737
ENSMUSG00000006014	ENSMUST00000006171;ENSMUST00000159035;ENSMUST00000161320;ENSMUST00000161611;ENSMUST00000162367;ENSMUST00000164600	96875	Prg4	proteoglycan 4 (megakaryocyte stimulating factor, articular superficial zone protein) [Source:MGI Symbol;Acc:MGI:1891344]	1	150325163	150341916	16754	-	1088	879	949	433	1236	669	3917	1498	1419	654	1661	1887	1043	1809	365	1046	485
ENSMUSG00000006019	ENSMUST00000094816;ENSMUST00000118795;ENSMUST00000119102;ENSMUST00000121123;ENSMUST00000128452;ENSMUST00000133518;ENSMUST00000163968	71723	Dhx34	DExH-box helicase 34 [Source:MGI Symbol;Acc:MGI:1918973]	7	15931072	15955962	24891	-	174	198	188	118	82	34	211	207	59	33	196	229	167	279	48	131	59
ENSMUSG00000006021	ENSMUST00000006178;ENSMUST00000127584;ENSMUST00000129080;ENSMUST00000130170;ENSMUST00000141430;ENSMUST00000149255;ENSMUST00000149388;ENSMUST00000152044	70394	Kptn	kaptin [Source:MGI Symbol;Acc:MGI:1890380]	7	15853820	15861441	7622	+	281	291	262	360	242	307	302	412	507	259	227	320	293	331	193	246	182
ENSMUSG00000006024	ENSMUST00000006181;ENSMUST00000124563;ENSMUST00000127637;ENSMUST00000132828;ENSMUST00000139507;ENSMUST00000140640;ENSMUST00000150208	108124	Napa	N-ethylmaleimide sensitive fusion protein attachment protein alpha [Source:MGI Symbol;Acc:MGI:104563]	7	15832383	15851900	19518	+	1419	1473	1450	1338	1155	850	1542	1958	1332	819	1436	1437	1199	1608	614	1283	817
ENSMUSG00000006050	ENSMUST00000006209;ENSMUST00000173202;ENSMUST00000173482;ENSMUST00000173875;ENSMUST00000174125;ENSMUST00000236330	24068	Sra1	steroid receptor RNA activator 1 [Source:MGI Symbol;Acc:MGI:1344414]	18	36799734	36803868	4135	-	1548	1670	1320	1650	1466	1708	1350	1639	2497	1719	1257	1180	1030	1333	1118	1384	1319
ENSMUSG00000006057	ENSMUST00000090541;ENSMUST00000107684;ENSMUST00000107686	11951	Atp5mc1	ATP synthase membrane subunit c locus 1 [Source:MGI Symbol;Acc:MGI:107653]	11	95959678	95966496	6819	-	3905.77	4647.02	4018.67	4778.67	4016.32	5260.36	3639.1	3514.6	7453.61	6785.68	3811.61	3971.23	3761.74	4495.41	2935.44	2983.44	3671.11
ENSMUSG00000006058	ENSMUST00000006217;ENSMUST00000107700;ENSMUST00000145749;ENSMUST00000150946;ENSMUST00000156394;ENSMUST00000156524	27681	Snf8	SNF8, ESCRT-II complex subunit, homolog (S. cerevisiae) [Source:MGI Symbol;Acc:MGI:1343161]	11	95925711	95938256	12546	+	746	873	780	894	737	848	759	761	1225	889	659	783	670	845	421	470	483
ENSMUSG00000006095	ENSMUST00000006254;ENSMUST00000141608;ENSMUST00000169358	66411	Tbcb	tubulin folding cofactor B [Source:MGI Symbol;Acc:MGI:1913661]	7	29923556	29931697	8142	-	431	515	467	554	381	554	504	503	759	430	428	482	412	481	262	335	308
ENSMUSG00000006127	ENSMUST00000006286;ENSMUST00000129298;ENSMUST00000130318;ENSMUST00000136605;ENSMUST00000139856;ENSMUST00000149134;ENSMUST00000150857	19062	Inpp5k	inositol polyphosphate 5-phosphatase K [Source:MGI Symbol;Acc:MGI:1194899]	11	75521814	75539697	17884	+	348	346	322	306	252	160	381	437	249	139	388	234	254	344	167	321	201
ENSMUSG00000006134	ENSMUST00000006293;ENSMUST00000231228;ENSMUST00000231629	12929	Crkl	v-crk avian sarcoma virus CT10 oncogene homolog-like [Source:MGI Symbol;Acc:MGI:104686]	16	17269851	17305298	35448	+	1080	886	983	654	630	451	939	1043	491	338	863	1009	710	964	294	952	417
ENSMUSG00000006154	ENSMUST00000086372;ENSMUST00000163137;ENSMUST00000163804;ENSMUST00000163893;ENSMUST00000164987;ENSMUST00000167068;ENSMUST00000167298;ENSMUST00000167599;ENSMUST00000167810;ENSMUST00000168924;ENSMUST00000169820;ENSMUST00000170423;ENSMUST00000170635;ENSMUST00000171445	67425	Eps8l1	EPS8-like 1 [Source:MGI Symbol;Acc:MGI:1914675]	7	4463673	4483486	19814	+	0	14	47	11	8	8	43	6	15	2	24	74	13	45	11	36	17
ENSMUSG00000006169	ENSMUST00000109260;ENSMUST00000109261;ENSMUST00000133715	216705	Clint1	clathrin interactor 1 [Source:MGI Symbol;Acc:MGI:2144243]	11	45742791	45801452	58662	+	1076	1054	1218	1177	1135	946	1402	1535	1705	1160	1534	2393	1500	1666	679	1283	789
ENSMUSG00000006191	ENSMUST00000006353;ENSMUST00000091674;ENSMUST00000110323;ENSMUST00000123641;ENSMUST00000124532;ENSMUST00000129231;ENSMUST00000131792;ENSMUST00000137225;ENSMUST00000140278;ENSMUST00000153086;ENSMUST00000154209	68916	Cdkal1	CDK5 regulatory subunit associated protein 1-like 1 [Source:MGI Symbol;Acc:MGI:1921765]	13	29375729	30039657	663929	-	164	178	164	180	169	146	178	229	245	140	131	165	159	184	122	213	106
ENSMUSG00000006205	ENSMUST00000006367;ENSMUST00000140741;ENSMUST00000150717;ENSMUST00000150905;ENSMUST00000153290	56213	Htra1	HtrA serine peptidase 1 [Source:MGI Symbol;Acc:MGI:1929076]	7	130537841	130587390	49550	+	39	46	38	123	89	69	114	116	90	56	96	32	27	60	19	36	16
ENSMUSG00000006215	ENSMUST00000006377;ENSMUST00000123477;ENSMUST00000130482;ENSMUST00000142020;ENSMUST00000142438;ENSMUST00000142695;ENSMUST00000144899	22642	Zbtb17	zinc finger and BTB domain containing 17 [Source:MGI Symbol;Acc:MGI:107410]	4	141171965	141195241	23277	+	243	208	212	199	174	170	259	298	205	148	191	297	206	228	100	191	97
ENSMUSG00000006218	ENSMUST00000006380	277743	Fam131c	family with sequence similarity 131, member C [Source:MGI Symbol;Acc:MGI:2685539]	4	141095531	141111486	15956	+	47	35	23	52	43	25	25	38	40	13	40	33	28	70	14	16	18
ENSMUSG00000006219	ENSMUST00000006381;ENSMUST00000105784;ENSMUST00000105785;ENSMUST00000123150;ENSMUST00000127455;ENSMUST00000129602;ENSMUST00000130181;ENSMUST00000131317;ENSMUST00000133874;ENSMUST00000136831;ENSMUST00000137491;ENSMUST00000141518;ENSMUST00000147764;ENSMUST00000147785;ENSMUST00000153189	74202	Fblim1	filamin binding LIM protein 1 [Source:MGI Symbol;Acc:MGI:1921452]	4	141303373	141333407	30035	-	22	18	26	39	55	48	190	82	47	25	114	38	28	31	7	23	5
ENSMUSG00000006235	ENSMUST00000006397;ENSMUST00000213181	13857	Epor	erythropoietin receptor [Source:MGI Symbol;Acc:MGI:95408]	9	21870193	21874802	4610	-	19	19	18	24	13	7	16	19	14	14	19	14	12	19	15	14	15
ENSMUSG00000006241	ENSMUST00000006403;ENSMUST00000170304;ENSMUST00000214734;ENSMUST00000216710;ENSMUST00000217589	67119	Ccdc159	coiled-coil domain containing 159 [Source:MGI Symbol;Acc:MGI:1914369]	9	21838767	21847168	8402	+	75	100	66	76	61	58	70	73	73	55	89	93	97	123	21	85	58
ENSMUSG00000006262	ENSMUST00000006424;ENSMUST00000113229;ENSMUST00000125171;ENSMUST00000155298	68473	Mob1b	MOB kinase activator 1B [Source:MGI Symbol;Acc:MGI:1915723]	5	88868714	88912079	43366	+	1519	1659	1461	2012	2011	1906	1328	1559	2723	2293	1139	1448	1232	1544	1426	2043	1540
ENSMUSG00000006273	ENSMUST00000006435;ENSMUST00000123290;ENSMUST00000125211;ENSMUST00000129797;ENSMUST00000153079;ENSMUST00000153680	11966	Atp6v1b2	ATPase, H+ transporting, lysosomal V1 subunit B2 [Source:MGI Symbol;Acc:MGI:109618]	8	69541298	69566363	25066	+	1162	1150	1360	1094	1146	780	1651	1594	1236	781	1427	1079	880	1260	597	1033	629
ENSMUSG00000006276	ENSMUST00000163643;ENSMUST00000211977;ENSMUST00000212121;ENSMUST00000212257;ENSMUST00000212590;ENSMUST00000212950;ENSMUST00000249899	13859	Eps15l1	epidermal growth factor receptor pathway substrate 15-like 1 [Source:MGI Symbol;Acc:MGI:104582]	8	73094839	73175304	80466	-	317	303	337	261	233	162	428	453	269	160	359	464	311	378	135	363	175
ENSMUSG00000006281	ENSMUST00000006444;ENSMUST00000226222;ENSMUST00000226430;ENSMUST00000226789;ENSMUST00000227193;ENSMUST00000227228;ENSMUST00000227526;ENSMUST00000228562	21745	Tep1	telomerase associated protein 1 [Source:MGI Symbol;Acc:MGI:109573]	14	51061516	51108017	46502	-	277	300	307	341	252	330	496	470	466	335	434	402	331	448	131	306	192
ENSMUSG00000006288	ENSMUST00000006451;ENSMUST00000226768;ENSMUST00000227327;ENSMUST00000227751;ENSMUST00000227934;ENSMUST00000228440	219022	Ttc5	tetratricopeptide repeat domain 5 [Source:MGI Symbol;Acc:MGI:2683584]	14	51002872	51022976	20105	-	133	177	164	262	165	236	222	236	329	230	177	191	171	221	145	141	141
ENSMUSG00000006289	ENSMUST00000006452;ENSMUST00000159292;ENSMUST00000160375;ENSMUST00000160393;ENSMUST00000160464;ENSMUST00000160890;ENSMUST00000162177;ENSMUST00000162850	66246	Osgep	O-sialoglycoprotein endopeptidase [Source:MGI Symbol;Acc:MGI:1913496]	14	51143935	51162350	18416	-	279	402	338	474.99	380	464	331	442	730	504	327	376	296	408	230	281	285
ENSMUSG00000006299	ENSMUST00000006462;ENSMUST00000178235;ENSMUST00000186833;ENSMUST00000187046;ENSMUST00000190008;ENSMUST00000191258	227290	Aamp	angio-associated migratory protein [Source:MGI Symbol;Acc:MGI:107809]	1	74318999	74323897	4899	-	2865	3062	3064	2734	2551	1985	3066	3285	3041	2188	2752	2566	2364	3133	1456	1873	1558
ENSMUSG00000006301	ENSMUST00000016309;ENSMUST00000113796;ENSMUST00000128505;ENSMUST00000130763;ENSMUST00000135384;ENSMUST00000141560;ENSMUST00000152603;ENSMUST00000154859	69660	Tmbim1	transmembrane BAX inhibitor motif containing 1 [Source:MGI Symbol;Acc:MGI:1916910]	1	74327406	74344781	17376	-	1373	1421	1359	1498	1567	1111	1954	2468	2160	1309	1808	1629	1262	1806	971	1244	942
ENSMUSG00000006304	ENSMUST00000006467;ENSMUST00000113819;ENSMUST00000113820;ENSMUST00000185733	76709	Arpc2	actin related protein 2/3 complex, subunit 2 [Source:MGI Symbol;Acc:MGI:1923959]	1	74275243	74307368	32126	+	2350	2455	2133	2292	2073	1616	3017	3760	3036	1831	2377	2493	1884	2417	1441	2894	1721
ENSMUSG00000006307	ENSMUST00000006470;ENSMUST00000108154;ENSMUST00000125372;ENSMUST00000125836;ENSMUST00000128456;ENSMUST00000131002;ENSMUST00000136959;ENSMUST00000152931	75410	Kmt2b	lysine (K)-specific methyltransferase 2B [Source:MGI Symbol;Acc:MGI:109565]	7	30268283	30288151	19869	-	648	534	616	384	323	128	626	728	200	145	597	666	536	758	155	632	284
ENSMUSG00000006315	ENSMUST00000006478;ENSMUST00000207263;ENSMUST00000207296;ENSMUST00000207779;ENSMUST00000207955;ENSMUST00000208169;ENSMUST00000209065	69804	Tmem147	transmembrane protein 147 [Source:MGI Symbol;Acc:MGI:1915011]	7	30427126	30428965	1840	-	1705	1735	1905	2290	2045	2928	1581	1450	3466	3145	1707	1675	1531	1854	1217	1175	1400
ENSMUSG00000006333	ENSMUST00000006496;ENSMUST00000108623;ENSMUST00000108624;ENSMUST00000108625;ENSMUST00000126562;ENSMUST00000128729;ENSMUST00000136858;ENSMUST00000139818;ENSMUST00000146303;ENSMUST00000146927	76846	Rps9	ribosomal protein S9 [Source:MGI Symbol;Acc:MGI:1924096]	7	3706992	3709896	2905	+	4469.46	5340.92	4525.93	7155.71	5995.73	11159.8	6206.88	5654.67	14817.6	13918.6	5804.91	5592.95	4011.95	6086.92	4538.16	3186.72	4638.85
ENSMUSG00000006335	ENSMUST00000058880;ENSMUST00000108641;ENSMUST00000153143;ENSMUST00000155592;ENSMUST00000156194;ENSMUST00000205596;ENSMUST00000206370	69714	Tfpt	TCF3 (E2A) fusion partner [Source:MGI Symbol;Acc:MGI:1916964]	7	3623323	3632928	9606	-	161	183	155	191	186	182	208	196	299	200	148	203	135	160	105	104	122
ENSMUSG00000006342	ENSMUST00000077610;ENSMUST00000095541;ENSMUST00000218896;ENSMUST00000219733	71733	Susd2	sushi domain containing 2 [Source:MGI Symbol;Acc:MGI:1918983]	10	75472540	75479842	7303	-	47	36	39	44	41	16	78	80	34	17	65	57	31	62	26	57	19
ENSMUSG00000006344	ENSMUST00000072217;ENSMUST00000188444;ENSMUST00000189972;ENSMUST00000189991;ENSMUST00000218807;ENSMUST00000219214;ENSMUST00000219247	23887	Ggt5	gamma-glutamyltransferase 5 [Source:MGI Symbol;Acc:MGI:1346063]	10	75425174	75453034	27861	+	29	43	34	21	21	23	26	28	38	15	17	34	36	43	28	20	20
ENSMUSG00000006345	ENSMUST00000006508;ENSMUST00000124259;ENSMUST00000125770;ENSMUST00000128886;ENSMUST00000129020;ENSMUST00000129232;ENSMUST00000131565;ENSMUST00000134503;ENSMUST00000139459;ENSMUST00000140219;ENSMUST00000141062;ENSMUST00000143226;ENSMUST00000143792;ENSMUST00000145079;ENSMUST00000145928;ENSMUST00000148447;ENSMUST00000151212;ENSMUST00000152657;ENSMUST00000155186;ENSMUST00000156487	14598	Ggt1	gamma-glutamyltransferase 1 [Source:MGI Symbol;Acc:MGI:95706]	10	75397438	75422034	24597	+	2	0	3	1	1	1	14	4	8	4	19	2	0	0	2	0	0
ENSMUSG00000006356	ENSMUST00000084882;ENSMUST00000196015;ENSMUST00000197396;ENSMUST00000199976;ENSMUST00000200177;ENSMUST00000200380	68337	Crip2	cysteine rich protein 2 [Source:MGI Symbol;Acc:MGI:1915587]	12	113103856	113109126	5271	+	792	863	1041	755	585	426	1290	1804	987	588	1155	1970	1479	1592	354	520	387
ENSMUSG00000006360	ENSMUST00000006523;ENSMUST00000196932;ENSMUST00000198597;ENSMUST00000198909;ENSMUST00000199089;ENSMUST00000200553	12925	Crip1	cysteine-rich protein 1 [Source:MGI Symbol;Acc:MGI:88501]	12	113109936	113117499	7564	+	36	55	39	99	123	146	265	192	422	253	183	57	23	38	28	22	24
ENSMUSG00000006362	ENSMUST00000006525;ENSMUST00000064674;ENSMUST00000127984;ENSMUST00000134045;ENSMUST00000142535;ENSMUST00000147374;ENSMUST00000148630	12398	Cbfa2t3	CBFA2/RUNX1 translocation partner 3 [Source:MGI Symbol;Acc:MGI:1338013]	8	123351880	123425848	73969	-	33	30	41	34	38	16	124	51	13	12	70	62	40	52	7	37	15
ENSMUSG00000006369	ENSMUST00000057410;ENSMUST00000109432;ENSMUST00000160798	14114	Fbln1	fibulin 1 [Source:MGI Symbol;Acc:MGI:95487]	15	85090150	85170736	80587	+	24	18	38	46	51	22	55	54	29	25	77	16	25	28	12	29	16
ENSMUSG00000006373	ENSMUST00000073339	53328	Pgrmc1	progesterone receptor membrane component 1 [Source:MGI Symbol;Acc:MGI:1858305]	X	35861859	35869732	7874	+	36296	42544	32563	51499	49418	59889	32331	38228	96958	54667	30944	34419	33559	49457	35221	39032	36726
ENSMUSG00000006378	ENSMUST00000006544;ENSMUST00000229276	26912	Gcat	glycine C-acetyltransferase (2-amino-3-ketobutyrate-coenzyme A ligase) [Source:MGI Symbol;Acc:MGI:1349389]	15	78915074	78922553	7480	+	1794.77	1858	1818	1925	1368	1558	1421	1591	1795	1499	1555	1823	1763	2157	926	1483	1110
ENSMUSG00000006386	ENSMUST00000071168;ENSMUST00000073939;ENSMUST00000102798;ENSMUST00000131958	21687	Tek	TEK receptor tyrosine kinase [Source:MGI Symbol;Acc:MGI:98664]	4	94627526	94763213	135688	+	168	223	173	231	216	245	230	255	201	215	272	231	210	264	89	205	102
ENSMUSG00000006390	ENSMUST00000006557;ENSMUST00000067896;ENSMUST00000102673;ENSMUST00000129419;ENSMUST00000135162;ENSMUST00000143140;ENSMUST00000167636	54325	Elovl1	ELOVL fatty acid elongase 1 [Source:MGI Symbol;Acc:MGI:1858959]	4	118285290	118290150	4861	+	879	733	871	726	598	313	1339	1309	647	370	1230	1662	1112	1570	379	858	607
ENSMUSG00000006392	ENSMUST00000019229;ENSMUST00000073881;ENSMUST00000084319;ENSMUST00000106384;ENSMUST00000125235;ENSMUST00000126089;ENSMUST00000130421;ENSMUST00000135201;ENSMUST00000144577;ENSMUST00000152633	80509	Med8	mediator complex subunit 8 [Source:MGI Symbol;Acc:MGI:1915269]	4	118266534	118272979	6446	+	655	676	691	903	806	792	768	834	1337	861	615	966	782	1041	464	654	473
ENSMUSG00000006395	ENSMUST00000106393;ENSMUST00000132882;ENSMUST00000179719;ENSMUST00000194248	NA	Hyi	hydroxypyruvate isomerase (putative) [Source:MGI Symbol;Acc:MGI:1915430]	4	118217187	118219941	2755	+	890	1186	742	1068	865	928	740	1181	1404	947	944	840	875	1279	606	724	626
ENSMUSG00000006398	ENSMUST00000006565;ENSMUST00000151302;ENSMUST00000183942	107995	Cdc20	cell division cycle 20 [Source:MGI Symbol;Acc:MGI:1859866]	4	118290098	118294549	4452	-	19	3	22	53	112	75	640	1365	1188	547	584	9	4	4	3	4	5
ENSMUSG00000006403	ENSMUST00000111314;ENSMUST00000111315;ENSMUST00000219033	240913	Adamts4	ADAM metallopeptidase with thrombospondin type 1 motif 4 [Source:MGI Symbol;Acc:MGI:1339949]	1	171077990	171088206	10217	+	4	4	8	5	4	3	21	8	6	7	17	4	3	1	1	1	1
ENSMUSG00000006411	ENSMUST00000006578;ENSMUST00000094325;ENSMUST00000111286	71740	Nectin4	nectin cell adhesion molecule 4 [Source:MGI Symbol;Acc:MGI:1918990]	1	171197667	171216166	18500	+	4	5	8	9	3	4	32	24	8	3	23	5	4	8	0	2	0
ENSMUSG00000006412	ENSMUST00000006579;ENSMUST00000135941;ENSMUST00000138323	18637	Pfdn2	prefoldin 2 [Source:MGI Symbol;Acc:MGI:1276111]	1	171173238	171186822	13585	+	819	1092	834	1130	987	1120	863	1075	1899	1224	847	701	627	845	609	706	683
ENSMUSG00000006418	ENSMUST00000078050;ENSMUST00000109214;ENSMUST00000127939	81018	Rnf114	ring finger protein 114 [Source:MGI Symbol;Acc:MGI:1933159]	2	167334565	167358093	23529	+	1386	1383	1407	1291	1377	914	1831	1542	1424	940	1291	1531	1136	1633	804	1168	841
ENSMUSG00000006423	ENSMUST00000047486;ENSMUST00000115248;ENSMUST00000115249;ENSMUST00000127966;ENSMUST00000143544;ENSMUST00000150873	77644	Steep1	STING1 ER exit protein 1 [Source:MGI Symbol;Acc:MGI:1924894]	X	36087390	36137764	50375	-	755.67	823.61	645.59	962.1	801.93	850.75	693.62	902.65	1305.53	757	643.95	740.78	662.58	850.78	612.88	869.34	770.63
ENSMUSG00000006435	ENSMUST00000111807;ENSMUST00000111808;ENSMUST00000235290;ENSMUST00000235326	18011	Neurl1a	neuralized E3 ubiquitin protein ligase 1A [Source:MGI Symbol;Acc:MGI:1334263]	19	47167259	47247880	80622	+	9	7	3	8	6	6	51	16	12	8	26	8	4	4	5	5	4
ENSMUSG00000006442	ENSMUST00000006611;ENSMUST00000140129;ENSMUST00000152701	20810	Srm	spermidine synthase [Source:MGI Symbol;Acc:MGI:102690]	4	148675960	148679450	3491	+	382	483	335	386	313	225	698	758	478	327	618	931	547	519	239	694	375
ENSMUSG00000006445	ENSMUST00000006614;ENSMUST00000131026;ENSMUST00000145523;ENSMUST00000149002	13836	Epha2	Eph receptor A2 [Source:MGI Symbol;Acc:MGI:95278]	4	141028551	141056695	28145	+	326	203	472	230	215	119	404	335	167	135	513	534	460	727	200	330	243
ENSMUSG00000006456	ENSMUST00000006625;ENSMUST00000113793;ENSMUST00000180008	56275	Rbm14	RNA binding motif protein 14 [Source:MGI Symbol;Acc:MGI:1929092]	19	4850597	4861662	11066	-	341.47	332.92	262.59	175.02	181.86	108.95	398.99	408.53	173.13	104.36	444.47	391.52	318.18	332.03	86.14	312.44	151.49
ENSMUSG00000006462	ENSMUST00000130679;ENSMUST00000141923;ENSMUST00000245042;ENSMUST00000348308;ENSMUST00000348309;ENSMUST00000348310;ENSMUST00000348311;ENSMUST00000348312;ENSMUST00000348313;ENSMUST00000348314;ENSMUST00000348315;ENSMUST00000348316;ENSMUST00000348317;ENSMUST00000348318;ENSMUST00000348319	NA	A530013C23Rik	RIKEN cDNA A530013C23 gene [Source:MGI Symbol;Acc:MGI:3041178]	2	167532548	167584184	51637	+	6	4	2	16	7	13	6	11	20	11	14	0	11	9	15	8	10
ENSMUSG00000006463	ENSMUST00000006632;ENSMUST00000160014;ENSMUST00000162088;ENSMUST00000162134;ENSMUST00000162720;ENSMUST00000162754	70605	Zdhhc24	zinc finger, DHHC domain containing 24 [Source:MGI Symbol;Acc:MGI:1917855]	19	4928696	4935425	6730	+	59	69	66	71	74	54	87	89	80	41	79	60	67	83	41	54	48
ENSMUSG00000006464	ENSMUST00000053506;ENSMUST00000235498;ENSMUST00000236150;ENSMUST00000236538;ENSMUST00000237085;ENSMUST00000237362;ENSMUST00000237638;ENSMUST00000238170	52028	Bbs1	Bardet-Biedl syndrome 1 [Source:MGI Symbol;Acc:MGI:1277215]	19	4936906	4956656	19751	-	29	15	33	25	20	11	23	42	14	12	39	23	14	36	10	22	9
ENSMUSG00000006471	ENSMUST00000100329;ENSMUST00000114349;ENSMUST00000123472;ENSMUST00000129705;ENSMUST00000132128;ENSMUST00000132591;ENSMUST00000137355;ENSMUST00000141808;ENSMUST00000147866;ENSMUST00000148589	78797	Ndor1	NADPH dependent diflavin oxidoreductase 1 [Source:MGI Symbol;Acc:MGI:1926047]	2	25134833	25146034	11202	-	264.13	210.66	194.37	221.12	166.6	73.74	306.72	265.17	130.05	50.5	239.85	386.25	261.16	409.68	93.11	263.15	153.92
ENSMUSG00000006476	ENSMUST00000006646;ENSMUST00000074422;ENSMUST00000100334;ENSMUST00000102931;ENSMUST00000114386;ENSMUST00000114388;ENSMUST00000116574;ENSMUST00000124309;ENSMUST00000132172;ENSMUST00000134744;ENSMUST00000135328;ENSMUST00000140733;ENSMUST00000140737;ENSMUST00000141866;ENSMUST00000144520;ENSMUST00000152122;ENSMUST00000152506;ENSMUST00000155909	56876	Nsmf	NMDA receptor synaptonuclear signaling and neuronal migration factor [Source:MGI Symbol;Acc:MGI:1861755]	2	24944367	24952893	8527	+	2540	1997	1830	1971	1509	881	1851	2599	1110	564	1770	3211	2709	3573	1023	2111	1460
ENSMUSG00000006494	ENSMUST00000006669;ENSMUST00000129427;ENSMUST00000129887;ENSMUST00000134362;ENSMUST00000148249;ENSMUST00000151358;ENSMUST00000152696;ENSMUST00000156036	228026	Pdk1	pyruvate dehydrogenase kinase, isoenzyme 1 [Source:MGI Symbol;Acc:MGI:1926119]	2	71703568	71734202	30635	+	1270	2086	887	1598	1200	1301	853	1753	1506	901	1030	1223	1723	1781	1002	2174	1135
ENSMUSG00000006498	ENSMUST00000057343;ENSMUST00000095457;ENSMUST00000099958;ENSMUST00000164385;ENSMUST00000165153;ENSMUST00000165704;ENSMUST00000165724;ENSMUST00000168216;ENSMUST00000168683;ENSMUST00000168988;ENSMUST00000169091;ENSMUST00000169483;ENSMUST00000169580;ENSMUST00000171216;ENSMUST00000171599;ENSMUST00000172282	19205	Ptbp1	polypyrimidine tract binding protein 1 [Source:MGI Symbol;Acc:MGI:97791]	10	79690261	79700605	10345	+	2197	2036	1963	1481	1547	802	3432	3337	1508	857	2613	2754	2111	2467	733	2104	1123
ENSMUSG00000006517	ENSMUST00000006692;ENSMUST00000211883	192156	Mvd	mevalonate (diphospho) decarboxylase [Source:MGI Symbol;Acc:MGI:2179327]	8	123160340	123170161	9822	-	69	69	35	85	40	94	85	89	82	56	47	413	362	218	50	53	54
ENSMUSG00000006519	ENSMUST00000017604;ENSMUST00000212600;ENSMUST00000212822	13057	Cyba	cytochrome b-245, alpha polypeptide [Source:MGI Symbol;Acc:MGI:1316658]	8	123151515	123159669	8155	-	82	117	86	251	240	525	628	431	1297	685	301	104	68	97	80	41	64
ENSMUSG00000006522	ENSMUST00000006697;ENSMUST00000226179;ENSMUST00000226547;ENSMUST00000227181;ENSMUST00000227995;ENSMUST00000228114	16426	Itih3	inter-alpha trypsin inhibitor, heavy chain 3 [Source:MGI Symbol;Acc:MGI:96620]	14	30630529	30645717	15189	-	19142	17157	18729	18110	29994	18325	37989	24806	22303	10350	19164	33090	13260	29441	12614	12926	7633
ENSMUSG00000006526	ENSMUST00000006701;ENSMUST00000226788;ENSMUST00000227246;ENSMUST00000227776;ENSMUST00000228046;ENSMUST00000228066	69179	Stimate	STIM activating enhancer [Source:MGI Symbol;Acc:MGI:1921500]	14	30547547	30599167	51621	+	219	263	210	332	290	264	265	332	379	233	262	258	212	288	157	284	216
ENSMUSG00000006527	ENSMUST00000054230;ENSMUST00000112184;ENSMUST00000227201;ENSMUST00000227303;ENSMUST00000227445;ENSMUST00000228006	54650	Sfmbt1	Scm-like with four mbt domains 1 [Source:MGI Symbol;Acc:MGI:1859609]	14	30436806	30544678	107873	+	787	791	799	912	841	746	792	1072	1072	669	623	678	589	709	404	774	457
ENSMUSG00000006529	ENSMUST00000006704;ENSMUST00000163118;ENSMUST00000227938	16424	Itih1	inter-alpha trypsin inhibitor, heavy chain 1 [Source:MGI Symbol;Acc:MGI:96618]	14	30651137	30665246	14110	-	16227	15761	15426	15580	14914	13020	16559	17623	14311	7696	12929	21758	13958	20579	7810	12941	7835
ENSMUSG00000006538	ENSMUST00000164097;ENSMUST00000189364	16147	Ihh	Indian hedgehog [Source:MGI Symbol;Acc:MGI:96533]	1	74984474	74990831	6358	-	60	53	111	55	68	33	96	91	103	68	295	45	50	69	36	101	101
ENSMUSG00000006567	ENSMUST00000006742;ENSMUST00000110738	11979	Atp7b	ATPase, Cu++ transporting, beta polypeptide [Source:MGI Symbol;Acc:MGI:103297]	8	22482801	22550321	67521	-	571	776	701	757	562	473	1097	1360	932	571	1232	1126	1002	1380	532	960	676
ENSMUSG00000006575	ENSMUST00000006750;ENSMUST00000107102;ENSMUST00000107103;ENSMUST00000107105;ENSMUST00000128331;ENSMUST00000131219;ENSMUST00000132876;ENSMUST00000142157;ENSMUST00000146330;ENSMUST00000150982	51799	Rundc3a	RUN domain containing 3A [Source:MGI Symbol;Acc:MGI:1858752]	11	102284229	102293381	9153	+	37	38	50	35	24	25	47	66	24	20	38	26	32	29	13	20	19
ENSMUSG00000006576	ENSMUST00000027415;ENSMUST00000124341;ENSMUST00000129703;ENSMUST00000132110;ENSMUST00000132612;ENSMUST00000138814;ENSMUST00000142257;ENSMUST00000145258;ENSMUST00000145516;ENSMUST00000150142;ENSMUST00000154101;ENSMUST00000189794	20536	Slc4a3	solute carrier family 4 (anion exchanger), member 3 [Source:MGI Symbol;Acc:MGI:109350]	1	75522910	75538816	15907	+	10	7	18	6	8	1	27	25	3	2	19	14	12	19	2	12	2
ENSMUSG00000006585	ENSMUST00000006760;ENSMUST00000212053;ENSMUST00000212201;ENSMUST00000212821;ENSMUST00000212967	67177	Cdt1	chromatin licensing and DNA replication factor 1 [Source:MGI Symbol;Acc:MGI:1914427]	8	123294754	123300293	5540	+	54	49	63	55	83	63	232	326	195	101	218	47	38	79	30	124	63
ENSMUSG00000006587	ENSMUST00000006762	30927	Snai3	snail family zinc finger 3 [Source:MGI Symbol;Acc:MGI:1353563]	8	123180947	123187472	6526	-	0	3	0	2	3	0	1	4	3	4	4	3	3	3	2	10	2
ENSMUSG00000006589	ENSMUST00000006764;ENSMUST00000211810;ENSMUST00000211823;ENSMUST00000212093;ENSMUST00000212834;ENSMUST00000213017;ENSMUST00000213029;ENSMUST00000213030;ENSMUST00000213062	11821	Aprt	adenine phosphoribosyl transferase [Source:MGI Symbol;Acc:MGI:88061]	8	123301374	123303648	2275	-	630	700	752	849	768	935	1190	1062	1714	1451	1299	757	680	1005	608	747	729
ENSMUSG00000006599	ENSMUST00000006774;ENSMUST00000107644;ENSMUST00000128420;ENSMUST00000144708;ENSMUST00000165031	14884	Gtf2h1	general transcription factor II H, polypeptide 1 [Source:MGI Symbol;Acc:MGI:1277216]	7	46445527	46473224	27698	+	661	694	742	635	648	490	793	845	882	676	713	678	580	784	432	878	429
ENSMUSG00000006611	ENSMUST00000006787;ENSMUST00000091706;ENSMUST00000091707;ENSMUST00000151243	15216	Hfe	homeostatic iron regulator [Source:MGI Symbol;Acc:MGI:109191]	13	23886017	23894837	8821	-	1100	1230	1297	1422	1347	1348	1416	1274	2113	1454	1186	1357	1240	1820	926	1013	848
ENSMUSG00000006638	ENSMUST00000201125	57742	Abhd1	abhydrolase domain containing 1 [Source:MGI Symbol;Acc:MGI:1931013]	5	31107410	31112435	5026	+	29	36	29	39	39	20	59	38	37	24	49	43	38	56	18	52	33
ENSMUSG00000006641	ENSMUST00000080431;ENSMUST00000114668;ENSMUST00000200816;ENSMUST00000201017;ENSMUST00000202520;ENSMUST00000202556;ENSMUST00000202984	330064	Slc5a6	solute carrier family 5 (sodium-dependent vitamin transporter), member 6 [Source:MGI Symbol;Acc:MGI:2660847]	5	31193380	31206268	12889	-	144	195	185	232	243	131	390	405	377	250	587	147	106	159	264	553	243
ENSMUSG00000006651	ENSMUST00000006828;ENSMUST00000207514;ENSMUST00000208404;ENSMUST00000208792;ENSMUST00000209054	11803	Aplp1	amyloid beta precursor like protein 1 [Source:MGI Symbol;Acc:MGI:88046]	7	30134407	30144960	10554	-	7	9	8	4	6	5	18	11	9	7	19	12	7	9	2	15	4
ENSMUSG00000006673	ENSMUST00000006851;ENSMUST00000112155;ENSMUST00000192331;ENSMUST00000192819;ENSMUST00000192932;ENSMUST00000193258;ENSMUST00000193348;ENSMUST00000194139;ENSMUST00000194385;ENSMUST00000194387;ENSMUST00000194741;ENSMUST00000194743;ENSMUST00000195513;ENSMUST00000195563	69232	Qrich1	glutamine-rich 1 [Source:MGI Symbol;Acc:MGI:1916482]	9	108394005	108437362	43358	+	725	745	712	666	607	410	909	1074	659	388	756	1055	791	951	401	917	522
ENSMUSG00000006676	ENSMUST00000006854;ENSMUST00000085044;ENSMUST00000166103;ENSMUST00000178075;ENSMUST00000192854;ENSMUST00000193183;ENSMUST00000193412;ENSMUST00000193558;ENSMUST00000193571;ENSMUST00000193678;ENSMUST00000193975;ENSMUST00000194171;ENSMUST00000194225;ENSMUST00000194499;ENSMUST00000194863;ENSMUST00000195763;ENSMUST00000247867	71472	Usp19	ubiquitin specific peptidase 19 [Source:MGI Symbol;Acc:MGI:1918722]	9	108367801	108379536	11736	+	1558	1375	1530	1148	992	562	1656	1906	1010	507	1561	1775	1479	1906	539	1539	903
ENSMUSG00000006678	ENSMUST00000006856;ENSMUST00000124236;ENSMUST00000127718;ENSMUST00000142479	18968	Pola1	polymerase (DNA directed), alpha 1 [Source:MGI Symbol;Acc:MGI:99660]	X	92348373	92675761	327389	-	74	69	92	102	84	95	142	289	280	185	144	83	58	70	40	102	52
ENSMUSG00000006699	ENSMUST00000030417;ENSMUST00000051477	12540	Cdc42	cell division cycle 42 [Source:MGI Symbol;Acc:MGI:106211]	4	137047007	137085031	38025	-	3594	4122	3576	4817	4304	5075	5273	6089	8844	5946	4322	3926	3477	4122	2926	4337	3069
ENSMUSG00000006705	ENSMUST00000097352;ENSMUST00000175806;ENSMUST00000175812;ENSMUST00000176513;ENSMUST00000176701;ENSMUST00000176895;ENSMUST00000235255;ENSMUST00000235401;ENSMUST00000235869;ENSMUST00000236493;ENSMUST00000237038;ENSMUST00000237248;ENSMUST00000237748;ENSMUST00000237887	18771	Pknox1	Pbx/knotted 1 homeobox [Source:MGI Symbol;Acc:MGI:1201409]	17	31783708	31826667	42960	+	317	278	318	195	183	79	281	386	106	68	265	425	331	416	93	302	154
ENSMUSG00000006711	ENSMUST00000006893;ENSMUST00000141572;ENSMUST00000169411;ENSMUST00000171262	210108	D130043K22Rik	RIKEN cDNA D130043K22 gene [Source:MGI Symbol;Acc:MGI:3036268]	13	25029118	25085253	56136	+	124	153	74	91	65	94	46	58	61	62	88	82	104	90	58	63	72
ENSMUSG00000006715	ENSMUST00000006898;ENSMUST00000110382;ENSMUST00000175689;ENSMUST00000176890;ENSMUST00000177253	57441	Gmnn	geminin [Source:MGI Symbol;Acc:MGI:1927344]	13	24935828	24945906	10079	-	154	214	163	276	293	351	234	424	1118	716	296	101	101	129	205	270	265
ENSMUSG00000006717	ENSMUST00000006900;ENSMUST00000224839	66834	Acot13	acyl-CoA thioesterase 13 [Source:MGI Symbol;Acc:MGI:1914084]	13	25001931	25015523	13593	-	826	1067	955	1619	1324	2294	935	1027	3728	2994	1096	747	759	897	969	1032	1081
ENSMUSG00000006728	ENSMUST00000006911;ENSMUST00000120226;ENSMUST00000123456;ENSMUST00000125682;ENSMUST00000133115;ENSMUST00000135179;ENSMUST00000140254;ENSMUST00000142558;ENSMUST00000145670	12567	Cdk4	cyclin dependent kinase 4 [Source:MGI Symbol;Acc:MGI:88357]	10	126899403	126903789	4387	+	612	695	709	869	804	855	1136	961	1664	1244	1001	737	560	672	487	436	470
ENSMUSG00000006731	ENSMUST00000006914;ENSMUST00000217678;ENSMUST00000218977;ENSMUST00000219523;ENSMUST00000220055	14421	B4galnt1	beta-1,4-N-acetyl-galactosaminyl transferase 1 [Source:MGI Symbol;Acc:MGI:1342057]	10	127001094	127008199	7106	+	2100	1904	2106	1541	1324	687	2044	1962	900	569	1787	2246	1580	2294	597	1182	812
ENSMUSG00000006732	ENSMUST00000006915;ENSMUST00000120542;ENSMUST00000135655;ENSMUST00000139486;ENSMUST00000152960	17299	Mettl1	methyltransferase 1, tRNA methylguanosine [Source:MGI Symbol;Acc:MGI:1339986]	10	126877283	126882234	4952	+	141	178	141	163	132	125	200	187	157	120	151	316	257	250	119	209	150
ENSMUSG00000006736	ENSMUST00000060991;ENSMUST00000217875;ENSMUST00000218488;ENSMUST00000218603;ENSMUST00000220344	67125	Tspan31	tetraspanin 31 [Source:MGI Symbol;Acc:MGI:1914375]	10	126903149	126906133	2985	-	4306	4303	4502	4418	3865	3861	3907	3560	5084	4309	3909	4033	3260	4405	2777	3029	2907
ENSMUSG00000006740	ENSMUST00000025083;ENSMUST00000163210;ENSMUST00000164426;ENSMUST00000166249;ENSMUST00000168031;ENSMUST00000170959;ENSMUST00000234166	16573	Kif5b	kinesin family member 5B [Source:MGI Symbol;Acc:MGI:1098268]	18	6201002	6242174	41173	-	946	932	945	934	820	693	948	1242	1162	734	874	1206	938	1072	652	1719	683
ENSMUSG00000006763	ENSMUST00000143082;ENSMUST00000209780;ENSMUST00000209797;ENSMUST00000210628;ENSMUST00000210791	78935	Saal1	serum amyloid A-like 1 [Source:MGI Symbol;Acc:MGI:1926185]	7	46335532	46360104	24573	-	113	134	112	132	98	111	155	160	201	134	150	113	117	127	68	124	78
ENSMUSG00000006777	ENSMUST00000006969	94179	Krt23	keratin 23 [Source:MGI Symbol;Acc:MGI:2148866]	11	99368800	99383963	15164	-	49	104	217	84	74	37	133	115	210	551	620	31	24	29	37	78	79
ENSMUSG00000006782	ENSMUST00000103120;ENSMUST00000147403;ENSMUST00000148034;ENSMUST00000150414	12799	Cnp	2',3'-cyclic nucleotide 3' phosphodiesterase [Source:MGI Symbol;Acc:MGI:88437]	11	100465730	100482555	16826	+	255	294	227	391	246	253	492	577	386	189	388	367	369	414	144	254	210
ENSMUSG00000006784	ENSMUST00000006976;ENSMUST00000092684;ENSMUST00000127389;ENSMUST00000132143;ENSMUST00000150331	74407	Odad4	outer dynein arm complex subunit 4 [Source:MGI Symbol;Acc:MGI:1921657]	11	100436433	100463394	26962	+	8	9	4	3	1	2	3	11	0	2	8	1	3	2	4	26	4
ENSMUSG00000006800	ENSMUST00000088086;ENSMUST00000109249;ENSMUST00000125503;ENSMUST00000133395;ENSMUST00000139266;ENSMUST00000143996;ENSMUST00000146497	72043	Sulf2	sulfatase 2 [Source:MGI Symbol;Acc:MGI:1919293]	2	165915009	165997583	82575	-	311	452	662	344	417	109	781	557	299	154	788	595	559	1001	203	889	346
ENSMUSG00000006818	ENSMUST00000007012;ENSMUST00000232726;ENSMUST00000233278;ENSMUST00000233333;ENSMUST00000233451;ENSMUST00000233791;ENSMUST00000233897;ENSMUST00000233922	20656	Sod2	superoxide dismutase 2, mitochondrial [Source:MGI Symbol;Acc:MGI:98352]	17	13225733	13258950	33218	+	5516.69	6404.71	4866.85	5676	5101.78	4013	4896.66	6233.83	5792.77	3837	4513	4503.81	4941	6086.09	2816.83	5104	3289.95
ENSMUSG00000006850	ENSMUST00000007046;ENSMUST00000237079;ENSMUST00000237255;ENSMUST00000237559;ENSMUST00000237727;ENSMUST00000237870	71983	Tmco6	transmembrane and coiled-coil domains 6 [Source:MGI Symbol;Acc:MGI:1919233]	18	36868092	36875450	7359	+	81	84	52	55	47	78	69	93	78	45	54	120	122	146	67	51	63
ENSMUSG00000006906	ENSMUST00000068054;ENSMUST00000205345;ENSMUST00000205369;ENSMUST00000205648;ENSMUST00000205829;ENSMUST00000206400;ENSMUST00000206592	70527	Stambp	STAM binding protein [Source:MGI Symbol;Acc:MGI:1917777]	6	83520193	83549711	29519	-	267	271	290	303	232	169	291	336	274	160	234	249	256	305	151	337	181
ENSMUSG00000006920	ENSMUST00000100417;ENSMUST00000107284;ENSMUST00000107285;ENSMUST00000128974;ENSMUST00000134622;ENSMUST00000138835;ENSMUST00000146884;ENSMUST00000151291;ENSMUST00000154211	14055	Ezh1	enhancer of zeste 1 polycomb repressive complex 2 subunit [Source:MGI Symbol;Acc:MGI:1097695]	11	101081941	101117289	35349	-	317	402	393	376	280	210	490	553	336	200	439	384	344	525	200	372	222
ENSMUSG00000006930	ENSMUST00000103124;ENSMUST00000138603;ENSMUST00000146878;ENSMUST00000173630;ENSMUST00000174635	15114	Hap1	huntingtin-associated protein 1 [Source:MGI Symbol;Acc:MGI:1261831]	11	100238153	100246954	8802	-	24	30	27	24	10	16	31	47	33	10	32	29	12	29	13	14	15
ENSMUSG00000006931	ENSMUST00000066489;ENSMUST00000141840	66180	P3h4	prolyl 3-hydroxylase family member 4 (non-enzymatic) [Source:MGI Symbol;Acc:MGI:1913430]	11	100299282	100305662	6381	-	14	11	10	27	19	25	28	27	45	32	33	19	9	14	10	18	6
ENSMUSG00000006932	ENSMUST00000007130;ENSMUST00000126633;ENSMUST00000130466;ENSMUST00000130845;ENSMUST00000133689;ENSMUST00000139138;ENSMUST00000145093;ENSMUST00000154356;ENSMUST00000154687;ENSMUST00000156911;ENSMUST00000163844;ENSMUST00000169931;ENSMUST00000170729;ENSMUST00000178812;ENSMUST00000215573	12387	Ctnnb1	catenin beta 1 [Source:MGI Symbol;Acc:MGI:88276]	9	120758282	120789573	31292	+	4957	4867	4654	5005	4369	3951	5505	6191	5757	3802	4696	5384	4438	5773	2643	5151	3029
ENSMUSG00000006941	ENSMUST00000007139;ENSMUST00000217553	68969	Eif1b	eukaryotic translation initiation factor 1B [Source:MGI Symbol;Acc:MGI:1916219]	9	120321298	120324396	3099	+	318.48	377.51	375.15	458.66	351	408	343	384	766.19	450.38	320	386	307	381	236	280	261.46
ENSMUSG00000006958	ENSMUST00000007171;ENSMUST00000115423;ENSMUST00000151150;ENSMUST00000153299;ENSMUST00000231636;ENSMUST00000231689;ENSMUST00000231698;ENSMUST00000232020;ENSMUST00000232104;ENSMUST00000232646	12667	Chrd	chordin [Source:MGI Symbol;Acc:MGI:1313268]	16	20551877	20561134	9258	+	154	122	140	131	81	51	167	122	71	41	84	184	120	158	44	86	67
ENSMUSG00000006998	ENSMUST00000007212;ENSMUST00000166071;ENSMUST00000167869;ENSMUST00000169184;ENSMUST00000169195;ENSMUST00000172207;ENSMUST00000231897;ENSMUST00000232513;ENSMUST00000232629	21762	Psmd2	proteasome (prosome, macropain) 26S subunit, non-ATPase, 2 [Source:MGI Symbol;Acc:MGI:1096584]	16	20470402	20482164	11763	+	4412	4325	4099	3994	3454	2567	4386	4832	3761	2075	3833	4932	4014	5471	1962	4116	2295
ENSMUSG00000007029	ENSMUST00000087315;ENSMUST00000172570;ENSMUST00000172637;ENSMUST00000172656;ENSMUST00000172741;ENSMUST00000172999;ENSMUST00000173142;ENSMUST00000173302;ENSMUST00000173336;ENSMUST00000173584;ENSMUST00000173911;ENSMUST00000174084;ENSMUST00000174260	22321	Vars1	valyl-tRNA synthetase 1 [Source:MGI Symbol;Acc:MGI:90675]	17	35219963	35235298	15336	+	846	792	769	638	597	285	1301	1422	738	391	1315	1060	772	968	330	695	485
ENSMUSG00000007035	ENSMUST00000007250;ENSMUST00000097338;ENSMUST00000165329;ENSMUST00000172491;ENSMUST00000172536;ENSMUST00000173124;ENSMUST00000173685;ENSMUST00000173928;ENSMUST00000174026;ENSMUST00000174556;ENSMUST00000174603;ENSMUST00000174741	17687	Msh5	mutS homolog 5 [Source:MGI Symbol;Acc:MGI:1329021]	17	35247581	35265721	18141	-	10	27	7	14	12	10	16	25	11	13	22	13	20	21	7	18	15
ENSMUSG00000007036	ENSMUST00000007251;ENSMUST00000172584;ENSMUST00000173134;ENSMUST00000173190;ENSMUST00000173247;ENSMUST00000173579;ENSMUST00000173846	193742	Abhd16a	abhydrolase domain containing 16A [Source:MGI Symbol;Acc:MGI:99476]	17	35308239	35321963	13725	+	642	782	615	717	658	521	809	786	731	465	770	746	643	897	370	521	477
ENSMUSG00000007038	ENSMUST00000007253;ENSMUST00000173269;ENSMUST00000174715	18010	Neu1	neuraminidase 1 [Source:MGI Symbol;Acc:MGI:97305]	17	35150229	35154929	4701	+	894	964	877	1060	944	720	1142	1202	1340	907	1045	881	818	1167	671	889	667
ENSMUSG00000007039	ENSMUST00000007255;ENSMUST00000173520;ENSMUST00000173562;ENSMUST00000174493	51793	Ddah2	DDAH family member 2, ADMA independent [Source:MGI Symbol;Acc:MGI:1859016]	17	35278011	35281071	3061	+	41	54	33	70	59	85	95	76	115	98	80	46	48	60	24	21	19
ENSMUSG00000007041	ENSMUST00000007257;ENSMUST00000172599	114584	Clic1	chloride intracellular channel 1 [Source:MGI Symbol;Acc:MGI:2148924]	17	35268942	35277725	8784	+	260	304	291	494	445	602	817	832	1204	654	525	374	264	347	164	189	196
ENSMUSG00000007050	ENSMUST00000007266;ENSMUST00000114011;ENSMUST00000172523;ENSMUST00000172666;ENSMUST00000172777;ENSMUST00000172890;ENSMUST00000173004;ENSMUST00000174241;ENSMUST00000174326;ENSMUST00000174434;ENSMUST00000174860	27756	Lsm2	LSM2 homolog, U6 small nuclear RNA and mRNA degradation associated [Source:MGI Symbol;Acc:MGI:90676]	17	35200838	35204867	4030	+	169	182	189	188	146	152	220	282	380	229	207	172	155	177	117	174	154
ENSMUSG00000007080	ENSMUST00000007296;ENSMUST00000112481;ENSMUST00000112482;ENSMUST00000131887;ENSMUST00000141506;ENSMUST00000152495;ENSMUST00000182442	18973	Pole	polymerase (DNA directed), epsilon [Source:MGI Symbol;Acc:MGI:1196391]	5	110434172	110485340	51169	+	53	44	55	33	44	27	164	407	88	46	208	23	23	42	19	77	28
ENSMUSG00000007097	ENSMUST00000085913;ENSMUST00000097464;ENSMUST00000131751;ENSMUST00000137679;ENSMUST00000191781	98660	Atp1a2	ATPase, Na+/K+ transporting, alpha 2 polypeptide [Source:MGI Symbol;Acc:MGI:88106]	1	172099276	172125631	26356	-	17	14	19	25	22	19	44	41	17	16	36	18	28	17	7	23	4
ENSMUSG00000007207	ENSMUST00000005509;ENSMUST00000133812;ENSMUST00000144198;ENSMUST00000150838;ENSMUST00000156626;ENSMUST00000201008	20907	Stx1a	syntaxin 1A (brain) [Source:MGI Symbol;Acc:MGI:109355]	5	135052336	135079954	27619	+	10	8	9	8	8	4	17	8	3	2	7	12	5	7	2	9	6
ENSMUSG00000007216	ENSMUST00000061720;ENSMUST00000204042;ENSMUST00000204095	243372	Zfp775	zinc finger protein 775 [Source:MGI Symbol;Acc:MGI:2683557]	6	48578997	48600161	21165	+	59	46	65	47	37	31	58	71	27	17	61	105	53	87	25	45	30
ENSMUSG00000007338	ENSMUST00000007482;ENSMUST00000235520;ENSMUST00000236412;ENSMUST00000236833	18120	Mrpl49	mitochondrial ribosomal protein L49 [Source:MGI Symbol;Acc:MGI:108180]	19	6103652	6107815	4164	-	740	775	759	923	776	909	724	866	1403	929	704	687	603	823	480	726	574
ENSMUSG00000007379	ENSMUST00000166143;ENSMUST00000172288;ENSMUST00000173037;ENSMUST00000173206;ENSMUST00000174060;ENSMUST00000174486	329727	Dennd2c	DENN domain containing 2C [Source:MGI Symbol;Acc:MGI:3036254]	3	103009920	103077085	67166	+	10	14	15	17	17	30	18	16	26	22	14	14	8	19	8	14	6
ENSMUSG00000007411	ENSMUST00000075281;ENSMUST00000084953;ENSMUST00000221009;ENSMUST00000221390;ENSMUST00000221448;ENSMUST00000221459;ENSMUST00000221631;ENSMUST00000221753;ENSMUST00000221841;ENSMUST00000221923;ENSMUST00000222080;ENSMUST00000222870	17169	Mark3	MAP/microtubule affinity regulating kinase 3 [Source:MGI Symbol;Acc:MGI:1341865]	12	111540957	111622655	81699	+	940	900	837	867	860	575	989	1180	930	593	776	995	845	1045	535	1157	540
ENSMUSG00000007415	ENSMUST00000007559;ENSMUST00000119783;ENSMUST00000140871;ENSMUST00000196304	67210	Gatad1	GATA zinc finger domain containing 1 [Source:MGI Symbol;Acc:MGI:1914460]	5	3682932	3707185	24254	-	1094	1195	1140	1129	993	874	1344	1458	1310	941	1157	1163	960	1256	621	1157	736
ENSMUSG00000007458	ENSMUST00000007602;ENSMUST00000112610;ENSMUST00000123093	17113	M6pr	mannose-6-phosphate receptor, cation dependent [Source:MGI Symbol;Acc:MGI:96904]	6	122285679	122294639	8961	+	2403	2853	2636	3730	3264	4146	3201	3158	6503	4136	2851	2651	2230	2950	2162	2421	2202
ENSMUSG00000007476	ENSMUST00000095078;ENSMUST00000113654	241296	Lrrc8a	leucine rich repeat containing 8A VRAC subunit A [Source:MGI Symbol;Acc:MGI:2652847]	2	30127727	30153802	26076	+	495.14	415.41	634.3	326.86	333.26	165.99	665.15	554.65	238.82	161.37	511.36	574.42	339.37	514.38	106.04	350.61	166.76
ENSMUSG00000007564	ENSMUST00000007708;ENSMUST00000136975;ENSMUST00000138971;ENSMUST00000139293;ENSMUST00000147983;ENSMUST00000173359;ENSMUST00000173658;ENSMUST00000231928	51792	Ppp2r1a	protein phosphatase 2, regulatory subunit A, alpha [Source:MGI Symbol;Acc:MGI:1926334]	17	21165573	21186178	20606	+	1343	1494	1340	1403	1195	803	1976	1984	1455	861	1600	1712	1379	1769	751	1358	845
ENSMUSG00000007570	ENSMUST00000088007;ENSMUST00000114801;ENSMUST00000114803;ENSMUST00000114804;ENSMUST00000123248;ENSMUST00000124870;ENSMUST00000128079;ENSMUST00000133527;ENSMUST00000140404;ENSMUST00000141648;ENSMUST00000146104;ENSMUST00000151312;ENSMUST00000156505;ENSMUST00000156569;ENSMUST00000233381;ENSMUST00000233705	72775	Fance	Fanconi anemia, complementation group E [Source:MGI Symbol;Acc:MGI:1920025]	17	28532493	28545546	13054	+	168	149	150	163	148	129	170	194	173	103	125	178	154	225	75	97	111
ENSMUSG00000007589	ENSMUST00000007733;ENSMUST00000226314;ENSMUST00000226641;ENSMUST00000226819;ENSMUST00000227842;ENSMUST00000227873;ENSMUST00000227996;ENSMUST00000228264;ENSMUST00000228683	28113	Tinf2	Terf1 (TRF1)-interacting nuclear factor 2 [Source:MGI Symbol;Acc:MGI:107246]	14	55912146	55919277	7132	-	276	307	283	353	326	356	359	529	720	371	347	323	247	353	222	294	228
ENSMUSG00000007594	ENSMUST00000007738;ENSMUST00000212006;ENSMUST00000213092	330790	Hapln4	hyaluronan and proteoglycan link protein 4 [Source:MGI Symbol;Acc:MGI:2679531]	8	70536107	70543512	7406	+	213	199	133	143	95	77	217	164	42	22	111	414	345	375	47	137	70
ENSMUSG00000007603	ENSMUST00000007747;ENSMUST00000232684;ENSMUST00000233290;ENSMUST00000233549	224907	Dus3l	dihydrouridine synthase 3 like [Source:MGI Symbol;Acc:MGI:2147092]	17	57071757	57077093	5337	+	303	279	319	306	271	221	328	341	356	268	295	358	281	347	204	212	228
ENSMUSG00000007610	ENSMUST00000007754;ENSMUST00000095259;ENSMUST00000124349;ENSMUST00000127741;ENSMUST00000132907;ENSMUST00000146551;ENSMUST00000150969	70359	Gtpbp3	GTP binding protein 3 [Source:MGI Symbol;Acc:MGI:1917609]	8	71940747	71952227	11481	+	159	128	180	235	142	158	195	197	224	192	176	232	178	239	139	120	133
ENSMUSG00000007613	ENSMUST00000007757;ENSMUST00000044234;ENSMUST00000107725;ENSMUST00000123962;ENSMUST00000126171	21812	Tgfbr1	transforming growth factor, beta receptor I [Source:MGI Symbol;Acc:MGI:98728]	4	47353222	47414931	61710	+	767	676	767	892	822	878	1026	1148	1218	977	808	723	619	635	564	1312	620
ENSMUSG00000007617	ENSMUST00000060490;ENSMUST00000079086;ENSMUST00000080127;ENSMUST00000102752;ENSMUST00000109492;ENSMUST00000109493;ENSMUST00000109494;ENSMUST00000109495;ENSMUST00000109496;ENSMUST00000109497;ENSMUST00000109498;ENSMUST00000220609	26556	Homer1	homer scaffolding protein 1 [Source:MGI Symbol;Acc:MGI:1347345]	13	93436143	93541637	105495	+	236	287	232	322	256	276	284	291	419	238	186	290	249	286	142	312	198
ENSMUSG00000007646	ENSMUST00000007790;ENSMUST00000067692;ENSMUST00000129400;ENSMUST00000153073	114714	Rad51c	RAD51 paralog C [Source:MGI Symbol;Acc:MGI:2150020]	11	87267471	87295780	28310	-	6	12	14	8	5	9	26	40	27	16	25	28	22	17	1	3	0
ENSMUSG00000007655	ENSMUST00000007799;ENSMUST00000115453;ENSMUST00000115454;ENSMUST00000115455;ENSMUST00000115456;ENSMUST00000123439;ENSMUST00000130505;ENSMUST00000133065;ENSMUST00000150901;ENSMUST00000177234	12389	Cav1	caveolin 1, caveolae protein [Source:MGI Symbol;Acc:MGI:102709]	6	17306334	17341451	35118	+	49	61	49	63	82	43	142	102	66	64	95	46	43	48	24	41	23
ENSMUSG00000007656	ENSMUST00000007800;ENSMUST00000164467;ENSMUST00000166549;ENSMUST00000167885;ENSMUST00000168166;ENSMUST00000168301;ENSMUST00000169188;ENSMUST00000169448;ENSMUST00000170308;ENSMUST00000170310	59046	Arpp19	cAMP-regulated phosphoprotein 19 [Source:MGI Symbol;Acc:MGI:1891691]	9	74944896	74967595	22700	+	1004	1149	1165	1509	1404	1778	1404	1445	3467	1987	1315	1654	1362	1811	838	973	918
ENSMUSG00000007659	ENSMUST00000007803;ENSMUST00000109820;ENSMUST00000128172;ENSMUST00000134357;ENSMUST00000134902;ENSMUST00000140436;ENSMUST00000146380;ENSMUST00000156688;ENSMUST00000173755	12048	Bcl2l1	BCL2-like 1 [Source:MGI Symbol;Acc:MGI:88139]	2	152622588	152673648	51061	-	591	755	1007	775	662	511	1592	1654	1357	933	1270	1223	1079	1582	645	1011	892
ENSMUSG00000007670	ENSMUST00000007814;ENSMUST00000232759;ENSMUST00000232765;ENSMUST00000233246;ENSMUST00000233480	16549	Khsrp	KH-type splicing regulatory protein [Source:MGI Symbol;Acc:MGI:1336214]	17	57328051	57338522	10472	-	875	782	934	588	521	200	1140	1191	334	199	1020	1350	931	1046	279	793	428
ENSMUSG00000007721	ENSMUST00000007865;ENSMUST00000212680	234388	Ccdc124	coiled-coil domain containing 124 [Source:MGI Symbol;Acc:MGI:1916403]	8	71320871	71326579	5709	-	669	717	626	582	499	397	581	667	605	340	514	680	512	664	290	400	355
ENSMUSG00000007739	ENSMUST00000020562;ENSMUST00000145912;ENSMUST00000173853;ENSMUST00000173867;ENSMUST00000174047;ENSMUST00000174244;ENSMUST00000174659;ENSMUST00000174689;ENSMUST00000174746	12464	Cct4	chaperonin containing TCP1 subunit 4 [Source:MGI Symbol;Acc:MGI:104689]	11	22940519	22953780	13262	+	2207	2532	2023	2877	2456	3289	2446	2698	5046	3929	2131	2383	1871	2533	2413	2506	2143
ENSMUSG00000007777	ENSMUST00000007921;ENSMUST00000109098	66050	Trappc2b	trafficking protein particle complex 2B [Source:MGI Symbol;Acc:MGI:1913300]	11	51576213	51579701	3489	-	340	401	383	507	503	643	394	438	1044	724	337	465	388	525	323	409	376
ENSMUSG00000007783	ENSMUST00000063761;ENSMUST00000211862;ENSMUST00000211901;ENSMUST00000212217;ENSMUST00000212255;ENSMUST00000212836;ENSMUST00000212890	78070	Cpt1c	carnitine palmitoyltransferase 1c [Source:MGI Symbol;Acc:MGI:2446526]	7	44608796	44624275	15480	-	7	6	7	12	8	11	21	28	8	16	17	7	5	15	2	10	4
ENSMUSG00000007812	ENSMUST00000085661;ENSMUST00000167316;ENSMUST00000196069;ENSMUST00000199003;ENSMUST00000199322;ENSMUST00000200039	72611	Zfp655	zinc finger protein 655 [Source:MGI Symbol;Acc:MGI:1919861]	5	145168525	145184112	15588	+	720	913	598	1023	1026	1024	1026	1127	1961	1069	769	564	503	863	874	1293	935
ENSMUSG00000007815	ENSMUST00000007959;ENSMUST00000193424;ENSMUST00000193490;ENSMUST00000193619;ENSMUST00000194701	11848	Rhoa	ras homolog family member A [Source:MGI Symbol;Acc:MGI:1096342]	9	108183328	108215133	31806	+	3587	4226.98	3559	4680	4092	4592	4697.98	5391.99	6864.97	4677	3918	3673	3258	4057	2846	3741	2771.99
ENSMUSG00000007817	ENSMUST00000007961;ENSMUST00000159766;ENSMUST00000160190;ENSMUST00000160229;ENSMUST00000160680;ENSMUST00000161766;ENSMUST00000162546;ENSMUST00000162645	328365	Zmiz1	zinc finger, MIZ-type containing 1 [Source:MGI Symbol;Acc:MGI:3040693]	14	25459609	25667167	207559	+	779	898	906	516	443	151	1041	1277	250	158	840	1276	1258	1663	163	744	288
ENSMUSG00000007827	ENSMUST00000112830;ENSMUST00000188022;ENSMUST00000188172	232339	Ankrd26	ankyrin repeat domain 26 [Source:MGI Symbol;Acc:MGI:1917887]	6	118478269	118539187	60919	-	112	107	113	82	87	60	137	118	108	86	126	129	106	110	53	192	65
ENSMUSG00000007833	ENSMUST00000107815;ENSMUST00000209581;ENSMUST00000209755;ENSMUST00000209889;ENSMUST00000209957;ENSMUST00000209963;ENSMUST00000210125;ENSMUST00000210352;ENSMUST00000210539;ENSMUST00000210725;ENSMUST00000211169;ENSMUST00000211362	69748	Aldh16a1	aldehyde dehydrogenase 16 family, member A1 [Source:MGI Symbol;Acc:MGI:1916998]	7	44790108	44804008	13901	-	1375	1432	1383	1229	1073	867	1724	1613	1309	974	1297	1396	1294	1834	734	845	846
ENSMUSG00000007836	ENSMUST00000007980	77134	Hnrnpa0	heterogeneous nuclear ribonucleoprotein A0 [Source:MGI Symbol;Acc:MGI:1924384]	13	58273693	58276370	2678	-	1037	1021	1162	727	799	504	1464	1323	766	519	1243	1142	965	1183	326	715	369
ENSMUSG00000007837	ENSMUST00000007981;ENSMUST00000209219;ENSMUST00000209417;ENSMUST00000209920;ENSMUST00000210101;ENSMUST00000210493;ENSMUST00000210500;ENSMUST00000210690;ENSMUST00000211014;ENSMUST00000211084;ENSMUST00000211337	65116	Prrg2	proline-rich Gla (G-carboxyglutamic acid) polypeptide 2 [Source:MGI Symbol;Acc:MGI:1929596]	7	44703008	44712101	9094	-	480	534	507	572	552	532	477	458	574	455	406	463	407	592	279	242	317
ENSMUSG00000007850	ENSMUST00000069304;ENSMUST00000077817;ENSMUST00000109142;ENSMUST00000123371;ENSMUST00000126737;ENSMUST00000127964;ENSMUST00000128220;ENSMUST00000129631;ENSMUST00000132715;ENSMUST00000133435;ENSMUST00000134230;ENSMUST00000140056;ENSMUST00000141668;ENSMUST00000143301;ENSMUST00000150153;ENSMUST00000150657;ENSMUST00000151537;ENSMUST00000156642	59013	Hnrnph1	heterogeneous nuclear ribonucleoprotein H1 [Source:MGI Symbol;Acc:MGI:1891925]	11	50267817	50277355	9539	+	1593	1690	1634	1443	1233	1336	1818	2144	2265	1548	1900	1761	1504	1823	881	2166	1155
ENSMUSG00000007867	ENSMUST00000054565;ENSMUST00000220711;ENSMUST00000221161;ENSMUST00000221194;ENSMUST00000222821;ENSMUST00000222905;ENSMUST00000223269	76411	Ift43	intraflagellar transport 43 [Source:MGI Symbol;Acc:MGI:1923661]	12	86129315	86209233	79919	+	25	65	39	47	42	43	52	52	80	36	48	32	28	61	27	59	30
ENSMUSG00000007872	ENSMUST00000008016;ENSMUST00000133946;ENSMUST00000151001	15903	Id3	inhibitor of DNA binding 3 [Source:MGI Symbol;Acc:MGI:96398]	4	135870808	135873066	2259	+	434	358	494	858	921	543	1170	759	1689	1045	763	1600	868	1265	416	542	435
ENSMUSG00000007880	ENSMUST00000008024;ENSMUST00000105897;ENSMUST00000138473;ENSMUST00000139709;ENSMUST00000145664;ENSMUST00000168582	93760	Arid1a	AT-rich interaction domain 1A [Source:MGI Symbol;Acc:MGI:1935147]	4	133406319	133484080	77762	-	970	926	1126	611	515	180	1203	1306	273	153	992	1058	835	1139	180	1131	365
ENSMUSG00000007891	ENSMUST00000066401;ENSMUST00000151120;ENSMUST00000153679	13033	Ctsd	cathepsin D [Source:MGI Symbol;Acc:MGI:88562]	7	141929648	141941775	12128	-	6678.44	7048.11	6929	9006.48	9158	10296.7	14863.1	11190	16407	9944	11277	8785.35	7229.14	11314	6067	7018	5550
ENSMUSG00000007892	ENSMUST00000008036	56040	Rplp1	ribosomal protein lateral stalk subunit P1 [Source:MGI Symbol;Acc:MGI:1927099]	9	61820566	61821824	1259	-	6120	6895	6634	7358	6689	8815	8605	7588	13856	12338	8517	7381	5807	8215	4392	4933	5200
ENSMUSG00000007950	ENSMUST00000008094;ENSMUST00000212321;ENSMUST00000212503	64296	Abhd8	abhydrolase domain containing 8 [Source:MGI Symbol;Acc:MGI:1918946]	8	71909349	71916299	6951	-	94	76	93	71	52	31	124	133	63	38	92	129	85	118	26	38	37
ENSMUSG00000007987	ENSMUST00000008131;ENSMUST00000199101;ENSMUST00000200054;ENSMUST00000200153;ENSMUST00000200157	67286	Ift22	intraflagellar transport 22 [Source:MGI Symbol;Acc:MGI:1914536]	5	136937004	136944258	7255	+	58	91	76	122	98	138	141	86	204	125	114	76	43	73	64	76	56
ENSMUSG00000007989	ENSMUST00000127272;ENSMUST00000131309	14365	Fzd3	frizzled class receptor 3 [Source:MGI Symbol;Acc:MGI:108476]	14	65429898	65499912	70015	-	11	6	13	3	6	6	16	9	7	10	11	9	4	5	6	3	1
ENSMUSG00000008035	ENSMUST00000008179;ENSMUST00000115524;ENSMUST00000125623;ENSMUST00000144356;ENSMUST00000156321	68041	Mid1ip1	Mid1 interacting protein 1 (gastrulation specific G12-like (zebrafish)) [Source:MGI Symbol;Acc:MGI:1915291]	X	10581252	10585929	4678	+	1239	2243	997	2727	989	1562	861	1820	1360	733	913	1380	1378	879	505	2872	2024
ENSMUSG00000008036	ENSMUST00000086112;ENSMUST00000141496;ENSMUST00000205590;ENSMUST00000205607;ENSMUST00000205673	232910	Ap2s1	adaptor-related protein complex 2, sigma 1 subunit [Source:MGI Symbol;Acc:MGI:2141861]	7	16472335	16483219	10885	+	971	995	957	996	838	736	1195	1237	1213	815	1063	878	814	1197	455	731	549
ENSMUSG00000008090	ENSMUST00000013633;ENSMUST00000112560;ENSMUST00000196222;ENSMUST00000197255;ENSMUST00000199802	116701	Fgfrl1	fibroblast growth factor receptor-like 1 [Source:MGI Symbol;Acc:MGI:2150920]	5	108840248	108854790	14543	+	576	723	604	870	795	659	791	1167	1252	786	845	329	352	524	549	884	629
ENSMUSG00000008136	ENSMUST00000008280;ENSMUST00000185893;ENSMUST00000187357	14200	Fhl2	four and a half LIM domains 2 [Source:MGI Symbol;Acc:MGI:1338762]	1	43162234	43236144	73911	-	4	6	2	14	14	18	26	12	17	23	14	4	1	3	6	13	2
ENSMUSG00000008140	ENSMUST00000118515;ENSMUST00000118808;ENSMUST00000123928;ENSMUST00000138328;ENSMUST00000147102;ENSMUST00000150342;ENSMUST00000239015	69683	Emc10	ER membrane protein complex subunit 10 [Source:MGI Symbol;Acc:MGI:1916933]	7	44139361	44145953	6593	-	1317	1266	1357	1087	1280	878	1512	1389	1118	768	1239	1452	1241	1717	518	818	656
ENSMUSG00000008153	ENSMUST00000008297;ENSMUST00000112523;ENSMUST00000124998;ENSMUST00000143283;ENSMUST00000147947;ENSMUST00000150774;ENSMUST00000156040;ENSMUST00000238807;ENSMUST00000239139	232370	Clstn3	calsyntenin 3 [Source:MGI Symbol;Acc:MGI:2178323]	6	124407540	124441753	34214	-	111	175	111	286	242	98	106	91	165	25	79	76	132	162	42	49	36
ENSMUSG00000008167	ENSMUST00000095220;ENSMUST00000125109;ENSMUST00000139721;ENSMUST00000141183;ENSMUST00000142036;ENSMUST00000143763;ENSMUST00000145479;ENSMUST00000151962;ENSMUST00000152884	68628	Fbxw9	F-box and WD-40 domain protein 9 [Source:MGI Symbol;Acc:MGI:1915878]	8	85786684	85793753	7070	+	417	549	472	674	586	610	501	558	999	672	533	701	543	785	418	435	511
ENSMUSG00000008193	ENSMUST00000035323;ENSMUST00000098483;ENSMUST00000205506	272382	Spib	Spi-B transcription factor (Spi-1/PU.1 related) [Source:MGI Symbol;Acc:MGI:892986]	7	44175417	44181495	6079	-	3	0	8	7	12	9	9	19	8	6	14	12	0	5	2	6	4
ENSMUSG00000008200	ENSMUST00000013759;ENSMUST00000123314;ENSMUST00000123955;ENSMUST00000126829;ENSMUST00000135592;ENSMUST00000141672;ENSMUST00000142631;ENSMUST00000145747;ENSMUST00000152794;ENSMUST00000238890	55935	Fnbp4	formin binding protein 4 [Source:MGI Symbol;Acc:MGI:1860513]	2	90575714	90611365	35652	+	561	645	577	478	463	332	617	781	554	327	499	549	415	578	297	808	372
ENSMUSG00000008206	ENSMUST00000008350;ENSMUST00000175781;ENSMUST00000176042;ENSMUST00000176130;ENSMUST00000176267;ENSMUST00000176705;ENSMUST00000176837;ENSMUST00000176932;ENSMUST00000177010	67260	Cers4	ceramide synthase 4 [Source:MGI Symbol;Acc:MGI:1914510]	8	4543026	4581680	38655	+	43	45	57	46	30	44	53	76	62	31	58	60	54	67	33	54	49
ENSMUSG00000008226	ENSMUST00000090811;ENSMUST00000112050;ENSMUST00000123621;ENSMUST00000139926;ENSMUST00000154158;ENSMUST00000155019	74616	Scrn3	secernin 3 [Source:MGI Symbol;Acc:MGI:1921866]	2	73142945	73168162	25218	+	1271	1499	1218	1479	1235	1405	990	1298	1883	1418	928	1434	1267	1566	1143	1464	1120
ENSMUSG00000008301	ENSMUST00000008445;ENSMUST00000130163;ENSMUST00000132628	56698	Phax	phosphorylated adaptor for RNA export [Source:MGI Symbol;Acc:MGI:1891839]	18	56695515	56720784	25270	+	450	397	499	356	310	180	466	491	314	245	380	365	333	420	183	364	149
ENSMUSG00000008305	ENSMUST00000030095;ENSMUST00000072695;ENSMUST00000102848;ENSMUST00000107337;ENSMUST00000123259;ENSMUST00000132550;ENSMUST00000134225;ENSMUST00000137075;ENSMUST00000140154	21885	Tle1	transducin-like enhancer of split 1 [Source:MGI Symbol;Acc:MGI:104636]	4	72036042	72119130	83089	-	1282	1174	1421	975	754	739	935	1127	1219	958	1143	997	762	1067	745	1164	734
ENSMUSG00000008307	ENSMUST00000008451;ENSMUST00000125740;ENSMUST00000147801;ENSMUST00000156973;ENSMUST00000198134	77036	1700109H08Rik	RIKEN cDNA 1700109H08 gene [Source:MGI Symbol;Acc:MGI:1924286]	5	3621566	3634356	12791	+	26	23	25	10	9	5	16	22	7	9	12	10	12	28	11	29	12
ENSMUSG00000008318	ENSMUST00000008462;ENSMUST00000136231;ENSMUST00000139604;ENSMUST00000142885;ENSMUST00000155413;ENSMUST00000156855	320100	Relt	RELT tumor necrosis factor receptor [Source:MGI Symbol;Acc:MGI:2443373]	7	100495054	100512653	17600	-	3	6	5	8	14	11	34	26	27	14	25	8	1	3	2	5	2
ENSMUSG00000008333	ENSMUST00000008477;ENSMUST00000126763;ENSMUST00000127760;ENSMUST00000134091;ENSMUST00000139114	20639	Snrpb2	U2 small nuclear ribonucleoprotein B [Source:MGI Symbol;Acc:MGI:104805]	2	142904959	142914773	9815	+	261	307	303	404	328	446	346	373	786	535	276	291	239	293	250	372	253
ENSMUSG00000008348	ENSMUST00000108707;ENSMUST00000136312;ENSMUST00000156249	22190	Ubc	ubiquitin C [Source:MGI Symbol;Acc:MGI:98889]	5	125463029	125467266	4238	-	25582	31536	20546	26706	27171	24215	28206	46997	40555	18453	13094	50394	34798	33692	12348	10044	15674
ENSMUSG00000008373	ENSMUST00000008517;ENSMUST00000108636;ENSMUST00000125782;ENSMUST00000134047;ENSMUST00000143231;ENSMUST00000179769	68988	Prpf31	pre-mRNA processing factor 31 [Source:MGI Symbol;Acc:MGI:1916238]	7	3632984	3645485	12502	+	257	200	229	224	162	217	347	425	316	164	270	444	255	332	131	234	146
ENSMUSG00000008384	ENSMUST00000008528;ENSMUST00000135881	55942	Sertad1	SERTA domain containing 1 [Source:MGI Symbol;Acc:MGI:1913438]	7	27186335	27189741	3407	+	129	119	175	159	178	226	187	213	447	334	204	151	104	161	146	128	153
ENSMUSG00000008393	ENSMUST00000008537	52502	Carhsp1	calcium regulated heat stable protein 1 [Source:MGI Symbol;Acc:MGI:1196368]	16	8476444	8490019	13576	-	2576	2732	2630	2786	2735	1721	3149	3413	2544	1523	2719	2175	2007	2941	1033	1861	1344
ENSMUSG00000008398	ENSMUST00000008542;ENSMUST00000129827;ENSMUST00000133365;ENSMUST00000151153	13713	Elk3	ELK3, member of ETS oncogene family [Source:MGI Symbol;Acc:MGI:101762]	10	93083276	93146997	63722	-	118	163	142	203	174	171	327	306	221	187	274	233	171	233	85	143	84
ENSMUSG00000008429	ENSMUST00000008573;ENSMUST00000214190	80517	Herpud2	HERPUD family member 2 [Source:MGI Symbol;Acc:MGI:1915393]	9	25019428	25063116	43689	-	680	721	788	699	664	556	716	820	757	597	619	771	629	882	420	775	460
ENSMUSG00000008435	ENSMUST00000008579;ENSMUST00000119485;ENSMUST00000128299;ENSMUST00000138798;ENSMUST00000147599;ENSMUST00000154033	108841	Rdh13	retinol dehydrogenase 13 (all-trans and 9-cis) [Source:MGI Symbol;Acc:MGI:1918732]	7	4427769	4448648	20880	-	202	202	277	256	212	241	334	309	432	327	279	254	166	217	176	351	198
ENSMUSG00000008450	ENSMUST00000008594;ENSMUST00000212042;ENSMUST00000212200;ENSMUST00000212379;ENSMUST00000212398;ENSMUST00000212484;ENSMUST00000212610	68051	Nutf2	nuclear transport factor 2 [Source:MGI Symbol;Acc:MGI:1915301]	8	106587212	106605962	18751	+	465.31	512.57	455.29	609.4	475.17	698.02	678.82	704.88	1352.9	864.02	568.28	533.81	395.98	499.57	345.85	477.58	398.84
ENSMUSG00000008475	ENSMUST00000077755;ENSMUST00000097536;ENSMUST00000143008	67771	Arpc5	actin related protein 2/3 complex, subunit 5 [Source:MGI Symbol;Acc:MGI:1915021]	1	152642293	152651348	9056	+	1557	1818	1671	2497	2178	3100	2277	2270	5458	3753	1706	1642	1376	1668	1564	1800	1633
ENSMUSG00000008496	ENSMUST00000098679;ENSMUST00000108413;ENSMUST00000108415;ENSMUST00000108416;ENSMUST00000108417;ENSMUST00000108418;ENSMUST00000147146;ENSMUST00000175754;ENSMUST00000175774;ENSMUST00000176408	18987	Pou2f2	POU domain, class 2, transcription factor 2 [Source:MGI Symbol;Acc:MGI:101897]	7	24786769	24879151	92383	-	18	20	22	19	15	10	154	90	22	13	44	32	9	9	4	13	10
ENSMUSG00000008540	ENSMUST00000008684;ENSMUST00000118091;ENSMUST00000120230;ENSMUST00000120302;ENSMUST00000120939;ENSMUST00000125810;ENSMUST00000140932;ENSMUST00000204628	56615	Mgst1	microsomal glutathione S-transferase 1 [Source:MGI Symbol;Acc:MGI:1913850]	6	138117314	138133753	16440	+	69896	76233	55198	97869	94886	103493	52584	65765	165650	95746	49102	63970	65496	89635	75087	78961	74544
ENSMUSG00000008575	ENSMUST00000050872;ENSMUST00000064770;ENSMUST00000107245;ENSMUST00000107246;ENSMUST00000107247;ENSMUST00000107248;ENSMUST00000122918;ENSMUST00000135024;ENSMUST00000140874;ENSMUST00000148982;ENSMUST00000152588;ENSMUST00000155821	18028	Nfib	nuclear factor I/B [Source:MGI Symbol;Acc:MGI:103188]	4	82208410	82623987	415578	-	1660	2065	1889	1621	1547	1418	1771	2259	1846	1309	1645	1439	1471	2106	907	1988	1077
ENSMUSG00000008604	ENSMUST00000008748;ENSMUST00000192687;ENSMUST00000192962;ENSMUST00000194303;ENSMUST00000195498	94232	Ubqln4	ubiquilin 4 [Source:MGI Symbol;Acc:MGI:2150152]	3	88461065	88477032	15968	+	891	908	988	603	630	420	1065	1073	575	372	852	1124	936	1235	297	642	420
ENSMUSG00000008668	ENSMUST00000008812;ENSMUST00000172550;ENSMUST00000172799;ENSMUST00000173323;ENSMUST00000174175;ENSMUST00000174609;ENSMUST00000174620;ENSMUST00000174662;ENSMUST00000174745;ENSMUST00000174758;ENSMUST00000234380	20084	Rps18	ribosomal protein S18 [Source:MGI Symbol;Acc:MGI:98146]	17	34170973	34174975	4003	-	5455.9	6655.94	5223.65	9139.9	7791.97	14534.6	7096.88	7703.87	19905	15449.8	6894.91	6276.88	4691.97	6859.92	5550.68	4847.83	6244.64
ENSMUSG00000008682	ENSMUST00000008826;ENSMUST00000074085;ENSMUST00000125775;ENSMUST00000134330;ENSMUST00000135690;ENSMUST00000138954;ENSMUST00000142142;ENSMUST00000144434;ENSMUST00000146584;ENSMUST00000149171;ENSMUST00000151702	110954	Rpl10	ribosomal protein L10 [Source:MGI Symbol;Acc:MGI:105943]	X	73314418	73316741	2324	+	11201.9	12840.6	11028.1	13315.6	11431.7	16350.4	12304	13025.1	25668	20638.1	11579.6	12856.1	10551.5	14078.3	8921.49	10352.8	11144.4
ENSMUSG00000008683	ENSMUST00000106588;ENSMUST00000106590;ENSMUST00000128482;ENSMUST00000131374;ENSMUST00000131840;ENSMUST00000134270;ENSMUST00000172457	267019	Rps15a	ribosomal protein S15A [Source:MGI Symbol;Acc:MGI:2389091]	7	117703595	117715411	11817	-	1835	2228.99	1753	3262.99	2928.99	6035.99	2667.99	2894.99	10703	8003.99	2617	2421.99	1664	2389.99	2123.96	2268.95	2525.97
ENSMUSG00000008690	ENSMUST00000036987;ENSMUST00000074552;ENSMUST00000088717;ENSMUST00000123889;ENSMUST00000134900;ENSMUST00000136638;ENSMUST00000140665;ENSMUST00000141643;ENSMUST00000145259;ENSMUST00000145793;ENSMUST00000147207;ENSMUST00000147733;ENSMUST00000151523	52683	Ncaph2	non-SMC condensin II complex, subunit H2 [Source:MGI Symbol;Acc:MGI:1289164]	15	89239922	89257029	17108	+	1159	1300	1168	1283	1183	1237	1511	1988	2463	1641	1636	1216	1005	1385	811	866	818
ENSMUSG00000008730	ENSMUST00000029438;ENSMUST00000106845;ENSMUST00000118317;ENSMUST00000126351;ENSMUST00000135634;ENSMUST00000137078;ENSMUST00000200071	15257	Hipk1	homeodomain interacting protein kinase 1 [Source:MGI Symbol;Acc:MGI:1314873]	3	103647131	103698879	51749	-	1735	1745	1748	1338	1278	982	1735	2061	1309	800	1576	1574	1413	1902	698	1937	871
ENSMUSG00000008734	ENSMUST00000008878;ENSMUST00000207582;ENSMUST00000207614;ENSMUST00000208394	64297	Gprc5b	G protein-coupled receptor, family C, group 5, member B [Source:MGI Symbol;Acc:MGI:1927596]	7	118571270	118594434	23165	-	11	13	13	17	14	16	44	34	21	21	35	14	11	8	3	18	7
ENSMUSG00000008763	ENSMUST00000008907;ENSMUST00000123442;ENSMUST00000130066;ENSMUST00000133642;ENSMUST00000146818;ENSMUST00000196250	17156	Man1a2	mannosidase, alpha, class 1A, member 2 [Source:MGI Symbol;Acc:MGI:104676]	3	100469524	100592819	123296	-	928	815	937	754	780	531	1136	1195	776	466	926	973	776	972	362	1066	466
ENSMUSG00000008822	ENSMUST00000008966;ENSMUST00000065913;ENSMUST00000117138;ENSMUST00000121930	66204	Acyp1	acylphosphatase 1 [Source:MGI Symbol;Acc:MGI:1913454]	12	85319172	85335212	16041	-	104	123	99	193	180	265	86	114	403	283	97	86	95	127	116	87	144
ENSMUSG00000008845	ENSMUST00000032234;ENSMUST00000112541;ENSMUST00000203210	93671	Cd163	CD163 antigen [Source:MGI Symbol;Acc:MGI:2135946]	6	124281615	124307486	25872	+	221	175	188	184	184	166	232	588	323	92	108	240	136	205	89	176	64
ENSMUSG00000008855	ENSMUST00000008999;ENSMUST00000107150;ENSMUST00000107151;ENSMUST00000107152;ENSMUST00000124077;ENSMUST00000125072;ENSMUST00000126453;ENSMUST00000128686;ENSMUST00000131254;ENSMUST00000133651;ENSMUST00000136304;ENSMUST00000137787;ENSMUST00000140481;ENSMUST00000140962;ENSMUST00000145540;ENSMUST00000149087;ENSMUST00000150683;ENSMUST00000150965;ENSMUST00000155065;ENSMUST00000156337	15184	Hdac5	histone deacetylase 5 [Source:MGI Symbol;Acc:MGI:1333784]	11	102085258	102120992	35735	-	915	844	814	837	720	414	856	1043	477	296	697	1354	1073	1719	315	599	429
ENSMUSG00000008859	ENSMUST00000009003;ENSMUST00000223147	56044	Rala	v-ral simian leukemia viral oncogene A (ras related) [Source:MGI Symbol;Acc:MGI:1927243]	13	18055156	18118824	63669	-	545	650	595	621	536	520	604	802	860	594	545	624	553	668	364	592	392
ENSMUSG00000008892	ENSMUST00000009036;ENSMUST00000210096;ENSMUST00000211222	22335	Vdac3	voltage-dependent anion channel 3 [Source:MGI Symbol;Acc:MGI:106922]	8	23067102	23083774	16673	-	2247.18	2378.19	2094.45	3013.86	2457.83	3033.38	2680.77	3035.78	4940.13	3268.53	2206.44	2179.65	2051.8	2494.99	1611.13	2648.85	1779.72
ENSMUSG00000008958	ENSMUST00000009102;ENSMUST00000125548;ENSMUST00000136076;ENSMUST00000139296;ENSMUST00000152333	21427	Vps72	vacuolar protein sorting 72 [Source:MGI Symbol;Acc:MGI:1202305]	3	95018333	95030362	12030	+	294	319	272	330	343	288	377	472	421	243	332	353	236	355	178	220	157
ENSMUSG00000008976	ENSMUST00000009120;ENSMUST00000114184;ENSMUST00000126031;ENSMUST00000139101;ENSMUST00000148035	14390	Gabpa	GA repeat binding protein, alpha [Source:MGI Symbol;Acc:MGI:95610]	16	84631813	84660667	28855	+	1144	1253	1158	1305	1229	1240	1058	1345	1495	1245	1055	1093	1085	1313	725	1549	879
ENSMUSG00000008999	ENSMUST00000009143;ENSMUST00000137247	12162	Bmp7	bone morphogenetic protein 7 [Source:MGI Symbol;Acc:MGI:103302]	2	172709805	172782114	72310	-	46	42	66	41	42	20	48	49	36	17	58	25	31	49	17	35	14
ENSMUSG00000009013	ENSMUST00000009157;ENSMUST00000112090;ENSMUST00000123292;ENSMUST00000125959;ENSMUST00000127552;ENSMUST00000202980	56455	Dynll1	dynein light chain LC8-type 1 [Source:MGI Symbol;Acc:MGI:1861457]	5	115435169	115439058	3890	-	309	259	221	445	360	640	705	598	1348	701	532	753	401	505	179	262	336
ENSMUSG00000009030	ENSMUST00000009174;ENSMUST00000112940;ENSMUST00000138314;ENSMUST00000147703	67466	Pdcl	phosducin-like [Source:MGI Symbol;Acc:MGI:1914716]	2	37240086	37249344	9259	-	421	476	471	626	485	555	561	620	929	661	413	814	687	693	351	579	360
ENSMUSG00000009035	ENSMUST00000074991;ENSMUST00000178522;ENSMUST00000226929;ENSMUST00000228002;ENSMUST00000228472;ENSMUST00000229003;ENSMUST00000229049;ENSMUST00000231076	223693	Tmem184b	transmembrane protein 184b [Source:MGI Symbol;Acc:MGI:2445179]	15	79244884	79287769	42886	-	446	555	563	336	369	151	678	773	237	183	639	545	459	608	163	440	238
ENSMUSG00000009073	ENSMUST00000053079;ENSMUST00000056290;ENSMUST00000093374;ENSMUST00000109908;ENSMUST00000109910;ENSMUST00000124878;ENSMUST00000137926;ENSMUST00000141342;ENSMUST00000152656;ENSMUST00000155600;ENSMUST00000164190;ENSMUST00000167480;ENSMUST00000172305	18016	Nf2	neurofibromin 2 [Source:MGI Symbol;Acc:MGI:97307]	11	4715845	4799536	83692	-	603	635	626	548	440	234	794	1038	415	233	561	835	686	809	255	633	321
ENSMUSG00000009076	ENSMUST00000009220;ENSMUST00000141970;ENSMUST00000154341	67178	Zmat5	zinc finger, matrin type 5 [Source:MGI Symbol;Acc:MGI:1914428]	11	4654678	4687669	32992	+	90	100	106	117	101	119	101	117	177	110	78	81	66	105	61	59	87
ENSMUSG00000009079	ENSMUST00000063232;ENSMUST00000073308;ENSMUST00000079949;ENSMUST00000093365;ENSMUST00000102930;ENSMUST00000130060;ENSMUST00000130118;ENSMUST00000139886;ENSMUST00000141002;ENSMUST00000144238;ENSMUST00000150168;ENSMUST00000151497;ENSMUST00000151847	14030	Ewsr1	Ewing sarcoma breakpoint region 1 [Source:MGI Symbol;Acc:MGI:99960]	11	5019689	5049266	29578	-	1693	1774	1727	1505	1395	696	2098	2669	1250	706	1786	1842	1638	1936	662	1686	931
ENSMUSG00000009090	ENSMUST00000009234;ENSMUST00000101613;ENSMUST00000109897;ENSMUST00000133007;ENSMUST00000133014;ENSMUST00000137292;ENSMUST00000142325;ENSMUST00000144426;ENSMUST00000145704	11764	Ap1b1	adaptor protein complex AP-1, beta 1 subunit [Source:MGI Symbol;Acc:MGI:1096368]	11	4936824	4992791	55968	+	1234	1170	1247	1106	885	442	1833	1868	831	440	1536	1735	1306	1662	471	1255	676
ENSMUSG00000009092	ENSMUST00000009236;ENSMUST00000217811;ENSMUST00000218506;ENSMUST00000218718;ENSMUST00000218932;ENSMUST00000219568;ENSMUST00000219994;ENSMUST00000220190	70377	Derl3	Der1-like domain family, member 3 [Source:MGI Symbol;Acc:MGI:1917627]	10	75729247	75731775	2529	+	80	75	80	79	54	60	65	22	6	2	27	193	33	53	19	8	36
ENSMUSG00000009108	ENSMUST00000058669;ENSMUST00000130013;ENSMUST00000131856;ENSMUST00000142568;ENSMUST00000145101;ENSMUST00000151326	14686	Gnat2	G protein subunit alpha transducin 2 [Source:MGI Symbol;Acc:MGI:95779]	3	108000105	108008748	8644	+	45	46	39	33	21	48	34	31	68	45	40	62	37	34	20	41	36
ENSMUSG00000009112	ENSMUST00000009256;ENSMUST00000203037;ENSMUST00000203584;ENSMUST00000204004	94044	Bcl2l13	BCL2 like 13 [Source:MGI Symbol;Acc:MGI:2136959]	6	120813173	120869803	56631	+	1188	1055	973	917	983	690	1153	1187	902	702	1069	1239	883	1405	688	1148	680
ENSMUSG00000009145	ENSMUST00000077502;ENSMUST00000204803	93838	Dqx1	DEAQ RNA-dependent ATPase [Source:MGI Symbol;Acc:MGI:2136388]	6	83034825	83044299	9475	+	145	217	270	200	141	137	264	192	211	255	376	132	153	198	128	221	150
ENSMUSG00000009185	ENSMUST00000009329	20307	Ccl8	C-C motif chemokine ligand 8 [Source:MGI Symbol;Acc:MGI:101878]	11	82006011	82007625	1615	+	0	1	0	1	6	8	7	5	15	17	2	0	0	0	1	0	0
ENSMUSG00000009207	ENSMUST00000064503;ENSMUST00000102676;ENSMUST00000111993;ENSMUST00000127168;ENSMUST00000130232;ENSMUST00000130586;ENSMUST00000134168;ENSMUST00000134641;ENSMUST00000134764;ENSMUST00000145293;ENSMUST00000145933;ENSMUST00000154706;ENSMUST00000155006	69605	Lnpk	lunapark, ER junction formation factor [Source:MGI Symbol;Acc:MGI:1918115]	2	74350635	74409779	59145	-	85	90	85	134	107	110	89	165	207	112	104	86	109	92	76	150	69
ENSMUSG00000009281	ENSMUST00000009425;ENSMUST00000203541;ENSMUST00000204182;ENSMUST00000204267;ENSMUST00000204930	71660	Rarres2	retinoic acid receptor responder (tazarotene induced) 2 [Source:MGI Symbol;Acc:MGI:1918910]	6	48546630	48549723	3094	-	9776	12398	10168	15913	15937	18132	12134	12499	34937	23145	13343	9849	8314	11797	8904	8019	8445
ENSMUSG00000009291	ENSMUST00000009435;ENSMUST00000159116;ENSMUST00000161165;ENSMUST00000161789;ENSMUST00000162429;ENSMUST00000162598;ENSMUST00000162895;ENSMUST00000162943;ENSMUST00000167006;ENSMUST00000218797	108705	Pttg1ip	pituitary tumor-transforming 1 interacting protein [Source:MGI Symbol;Acc:MGI:2652132]	10	77417554	77434566	17013	+	5961	6869	6391	7035	7137	5470	7201	7680	8564	6284	7671	6016	5655	7870	4402	5911	4118
ENSMUSG00000009292	ENSMUST00000105399;ENSMUST00000105400;ENSMUST00000105401;ENSMUST00000126206;ENSMUST00000138238;ENSMUST00000140471;ENSMUST00000153842;ENSMUST00000154996;ENSMUST00000217806;ENSMUST00000219997	28240	Trpm2	transient receptor potential cation channel, subfamily M, member 2 [Source:MGI Symbol;Acc:MGI:1351901]	10	77743556	77806397	62842	-	73	72	77	59	45	53	178	247	110	41	139	102	48	92	40	43	36
ENSMUSG00000009293	ENSMUST00000172772;ENSMUST00000172813;ENSMUST00000173360;ENSMUST00000174510;ENSMUST00000174546	22213	Ube2g2	ubiquitin-conjugating enzyme E2G 2 [Source:MGI Symbol;Acc:MGI:1343188]	10	77458109	77481827	23719	+	690.72	577	788	667.09	623.75	510.17	889	775.75	886.54	623	698.82	1332	924	1067.8	332	452	313
ENSMUSG00000009376	ENSMUST00000080469;ENSMUST00000115442;ENSMUST00000115443;ENSMUST00000140070;ENSMUST00000145473;ENSMUST00000148903;ENSMUST00000152802	17295	Met	met proto-oncogene [Source:MGI Symbol;Acc:MGI:96969]	6	17463799	17573979	110181	+	2273	2754	2120	2214	2340	1990	2910	3520	3850	2381	2906	2081	2059	3034	1614	3125	2068
ENSMUSG00000009378	ENSMUST00000009522;ENSMUST00000235650	240638	Slc16a12	solute carrier family 16 (monocarboxylic acid transporters), member 12 [Source:MGI Symbol;Acc:MGI:2147716]	19	34645803	34724689	78887	-	1128	1393	795	1252	1265	1624	1741	2028	3106	2063	1792	1105	1105	1246	1083	1586	1502
ENSMUSG00000009406	ENSMUST00000009550;ENSMUST00000148133	13712	Elk1	ELK1, member of ETS oncogene family [Source:MGI Symbol;Acc:MGI:101833]	X	20799634	20816847	17214	-	128	97	153	108	84	84	186	198	143	99	133	100	92	108	57	116	91
ENSMUSG00000009418	ENSMUST00000067414;ENSMUST00000112103;ENSMUST00000187311;ENSMUST00000189252;ENSMUST00000189362;ENSMUST00000190130;ENSMUST00000190298;ENSMUST00000190735	215690	Nav1	neuron navigator 1 [Source:MGI Symbol;Acc:MGI:2183683]	1	135362318	135615843	253526	-	80	83	78	64	53	34	161	208	60	29	142	156	114	139	22	116	36
ENSMUSG00000009470	ENSMUST00000109399;ENSMUST00000109401;ENSMUST00000179271;ENSMUST00000179301;ENSMUST00000224022;ENSMUST00000224099	238799	Tnpo1	transportin 1 [Source:MGI Symbol;Acc:MGI:2681523]	13	98975527	99062892	87366	-	2043	2166	2003	1928	1949	1523	2171.96	2644.96	2330.95	1479	2030	1758	1611.96	2194	1369.95	2860.36	1593
ENSMUSG00000009535	ENSMUST00000009679;ENSMUST00000025427;ENSMUST00000129849;ENSMUST00000131075;ENSMUST00000139111;ENSMUST00000139554;ENSMUST00000148937;ENSMUST00000151833	67897	Rnmt	RNA (guanine-7-) methyltransferase [Source:MGI Symbol;Acc:MGI:1915147]	18	68433426	68457923	24498	+	341	365	266	407	391	417	372	435	623	383	291	446	341	433	270	392	258
ENSMUSG00000009545	ENSMUST00000009689;ENSMUST00000185383;ENSMUST00000186284;ENSMUST00000186288;ENSMUST00000186488;ENSMUST00000186798;ENSMUST00000187213	16535	Kcnq1	potassium voltage-gated channel, subfamily Q, member 1 [Source:MGI Symbol;Acc:MGI:108083]	7	142660099	142980779	320681	+	16	24	25	18	16	9	36	38	14	11	33	24	33	34	5	16	10
ENSMUSG00000009549	ENSMUST00000009693;ENSMUST00000110862;ENSMUST00000138189;ENSMUST00000149615	20813	Srp14	signal recognition particle 14 [Source:MGI Symbol;Acc:MGI:107169]	2	118306331	118310192	3862	-	655	723	587	1081	913	1503	739	805	2458	1712	705	694	504	715	595	695	764
ENSMUSG00000009555	ENSMUST00000009699;ENSMUST00000120105;ENSMUST00000123170;ENSMUST00000125058;ENSMUST00000128265;ENSMUST00000130399;ENSMUST00000144210;ENSMUST00000154131;ENSMUST00000155205	107951	Cdk9	cyclin dependent kinase 9 [Source:MGI Symbol;Acc:MGI:1328368]	2	32595796	32603088	7293	-	794	780	906	758	754	535	1011	899	816	572	859	859	660	962	370	629	419
ENSMUSG00000009563	ENSMUST00000009707;ENSMUST00000123624;ENSMUST00000140999;ENSMUST00000149720;ENSMUST00000149987;ENSMUST00000156617;ENSMUST00000175763;ENSMUST00000177382	30933	Tor2a	torsin family 2, member A [Source:MGI Symbol;Acc:MGI:1353596]	2	32647246	32652256	5011	+	732	703	765	743	769	600	1080	960	1101	782	888	969	703	953	523	589	543
ENSMUSG00000009566	ENSMUST00000028148;ENSMUST00000123171;ENSMUST00000127812;ENSMUST00000130164;ENSMUST00000132327;ENSMUST00000142186;ENSMUST00000143743;ENSMUST00000146498;ENSMUST00000149491;ENSMUST00000156792	14287	Fpgs	folylpolyglutamyl synthetase [Source:MGI Symbol;Acc:MGI:95576]	2	32572621	32594157	21537	-	2479	2231	2485	1882	1739	739	1816	1672	734	632	1974	3081	3380	4743	875	1405	892
ENSMUSG00000009569	ENSMUST00000009713;ENSMUST00000056715;ENSMUST00000115809;ENSMUST00000149359	239719	Mrtfb	myocardin related transcription factor B [Source:MGI Symbol;Acc:MGI:3050795]	16	13074345	13235393	161049	+	535	478	566	355	335	162	654	794	236	167	624	639	602	716	107	464	211
ENSMUSG00000009575	ENSMUST00000108813;ENSMUST00000118152;ENSMUST00000122182;ENSMUST00000127191	12419	Cbx5	chromobox 5 [Source:MGI Symbol;Acc:MGI:109372]	15	103099971	103148243	48273	-	735	812	792	713	639	446	1073	1529	798	480	953	746	684	897	455	1108	518
ENSMUSG00000009585	ENSMUST00000023054;ENSMUST00000109620;ENSMUST00000165537;ENSMUST00000175714;ENSMUST00000175752;ENSMUST00000175801;ENSMUST00000175827;ENSMUST00000175849;ENSMUST00000176325;ENSMUST00000176644;ENSMUST00000176823;ENSMUST00000176868;ENSMUST00000176904;ENSMUST00000177006;ENSMUST00000177098;ENSMUST00000177350;ENSMUST00000177483;ENSMUST00000230135;ENSMUST00000230410;ENSMUST00000230741	80287	Apobec3	apolipoprotein B mRNA editing enzyme, catalytic polypeptide 3 [Source:MGI Symbol;Acc:MGI:1933111]	15	79775860	79800107	24248	+	34	36	53	64	47	60	193	153	144	70	101	55	38	41	18	35	19
ENSMUSG00000009614	ENSMUST00000091224;ENSMUST00000102886;ENSMUST00000127805;ENSMUST00000129975;ENSMUST00000139312;ENSMUST00000142136;ENSMUST00000144448;ENSMUST00000147089;ENSMUST00000149733;ENSMUST00000156434	192166	Sardh	sarcosine dehydrogenase [Source:MGI Symbol;Acc:MGI:2183102]	2	27078405	27138349	59945	-	26234	28345	25864	20881	18825	9033	23343	25754.7	12625	8090	24344	22153	23014.3	30659	8887	20861.2	11584
ENSMUSG00000009621	ENSMUST00000056176;ENSMUST00000132642;ENSMUST00000135584;ENSMUST00000146843;ENSMUST00000148067;ENSMUST00000149758;ENSMUST00000185188	22325	Vav2	vav 2 oncogene [Source:MGI Symbol;Acc:MGI:102718]	2	27152116	27317045	164930	-	975	903	1015	685	671	347	1357	1342	480	280	1010	1016	792	1135	295	952	538
ENSMUSG00000009630	ENSMUST00000009774	19053	Ppp2cb	protein phosphatase 2 (formerly 2A), catalytic subunit, beta isoform [Source:MGI Symbol;Acc:MGI:1321161]	8	34089653	34109469	19817	+	616	583	668	523	506	410	723	794	671	485	652	728	555	725	305	633	324
ENSMUSG00000009633	ENSMUST00000009777	14373	G0s2	G0/G1 switch gene 2 [Source:MGI Symbol;Acc:MGI:1316737]	1	192954469	192955525	1057	-	443	368	470	1106	1444	1260	622	295	1358	1769	1931	408	619	1167	1135	421	286
ENSMUSG00000009640	ENSMUST00000102687;ENSMUST00000123586;ENSMUST00000127750;ENSMUST00000129510;ENSMUST00000134642;ENSMUST00000135582	66233	Dmap1	DNA methyltransferase 1-associated protein 1 [Source:MGI Symbol;Acc:MGI:1913483]	4	117531878	117539470	7593	-	236	249	259	241	192	157	274	332	223	153	234	287	236	286	122	178	139
ENSMUSG00000009646	ENSMUST00000009790;ENSMUST00000162643	69836	Pla2g12b	phospholipase A2, group XIIB [Source:MGI Symbol;Acc:MGI:1917086]	10	59239482	59257798	18317	+	964	1015	1138	1564	1536	1831	1227	1062	2635	1883	1199	1246	874	1311	891	690	739
ENSMUSG00000009647	ENSMUST00000009791;ENSMUST00000020312;ENSMUST00000161168;ENSMUST00000161435;ENSMUST00000162012	215999	Mcu	mitochondrial calcium uniporter [Source:MGI Symbol;Acc:MGI:3026965]	10	59282806	59452514	169709	-	474	483	481	417	427	177	393	444	256	131	283	479	616	641	127	227	146
ENSMUSG00000009654	ENSMUST00000009798;ENSMUST00000162493	18302	Oit3	oncoprotein induced transcript 3 [Source:MGI Symbol;Acc:MGI:1201782]	10	59258780	59277600	18821	-	334	423	357	415	308	355	369	664	405	224	434	453	371	448	180	317	162
ENSMUSG00000009681	ENSMUST00000164107;ENSMUST00000218057;ENSMUST00000218465;ENSMUST00000218591;ENSMUST00000219807	110279	Bcr	BCR activator of RhoGEF and GTPase [Source:MGI Symbol;Acc:MGI:88141]	10	74896424	75020753	124330	+	885	799	1069	534	461	161	1051	1204	299	148	911	1074	894	1269	191	795	325
ENSMUSG00000009687	ENSMUST00000009831;ENSMUST00000159753;ENSMUST00000159924;ENSMUST00000160006;ENSMUST00000160689;ENSMUST00000161259;ENSMUST00000161684;ENSMUST00000161805;ENSMUST00000162087;ENSMUST00000162116;ENSMUST00000162250;ENSMUST00000162733;ENSMUST00000202395;ENSMUST00000205301	18301	Fxyd5	FXYD domain-containing ion transport regulator 5 [Source:MGI Symbol;Acc:MGI:1201785]	7	30732147	30741906	9760	-	45	45	59	106	89	100	305	230	257	116	155	76	24	48	28	33	16
ENSMUSG00000009733	ENSMUST00000009877;ENSMUST00000229265;ENSMUST00000229581;ENSMUST00000229696;ENSMUST00000230039;ENSMUST00000230254;ENSMUST00000230363;ENSMUST00000231138;ENSMUST00000231174	21422	Tfcp2	transcription factor CP2 [Source:MGI Symbol;Acc:MGI:98509]	15	100395893	100449889	53997	-	133	141	162	162	127	119	176	162	178	120	118	215	195	252	85	171	100
ENSMUSG00000009739	ENSMUST00000073837;ENSMUST00000176140;ENSMUST00000176271;ENSMUST00000176300;ENSMUST00000177202;ENSMUST00000177247;ENSMUST00000177335;ENSMUST00000177505;ENSMUST00000205510;ENSMUST00000230790	19009	Pou6f1	POU domain, class 6, transcription factor 1 [Source:MGI Symbol;Acc:MGI:102935]	15	100473199	100497865	24667	-	192	163	117	183	120	64	162	278	139	56	154	203	169	217	59	163	94
ENSMUSG00000009741	ENSMUST00000009885;ENSMUST00000084885;ENSMUST00000214095;ENSMUST00000216293;ENSMUST00000216558;ENSMUST00000216891	22221	Ubp1	upstream binding protein 1 [Source:MGI Symbol;Acc:MGI:104889]	9	113760002	113806270	46269	+	1555	1588	1474	1412	1394	967	1439	1657	1632	964	1265	1327	1107	1524	837	1511	936
ENSMUSG00000009772	ENSMUST00000072177;ENSMUST00000082125;ENSMUST00000128661;ENSMUST00000133246	74137	Nuak2	NUAK family, SNF1-like kinase, 2 [Source:MGI Symbol;Acc:MGI:1921387]	1	132243864	132261226	17363	+	160	114	116	215	127	64	391	434	153	60	176	367	279	336	111	349	139
ENSMUSG00000009828	ENSMUST00000009972;ENSMUST00000044551;ENSMUST00000117330;ENSMUST00000118869;ENSMUST00000125615;ENSMUST00000142402;ENSMUST00000142776;ENSMUST00000149821	56542	Cilk1	ciliogenesis associated kinase 1 [Source:MGI Symbol;Acc:MGI:1934157]	9	78016474	78079389	62916	+	274	353	284	253	225	122	425	535	273	150	372	722	577	611	136	406	249
ENSMUSG00000009863	ENSMUST00000010007;ENSMUST00000125780;ENSMUST00000129181	67680	Sdhb	succinate dehydrogenase complex, subunit B, iron sulfur (Ip) [Source:MGI Symbol;Acc:MGI:1914930]	4	140688514	140706504	17991	+	4287	5469	4467	6870	5568	6661	4263	5349	10240	7510	4380	3752	3992	4928	3734	5389	3938
ENSMUSG00000009894	ENSMUST00000010038;ENSMUST00000120940;ENSMUST00000125846;ENSMUST00000132969;ENSMUST00000136436;ENSMUST00000145550;ENSMUST00000150297;ENSMUST00000156146	67826	Snap47	synaptosomal-associated protein, 47 [Source:MGI Symbol;Acc:MGI:1915076]	11	59297960	59342012	44053	-	1461	1554	1236	1579	1255	1141	1749	1918	1726	863	1300	2098	1561	2301	1201	1717	1418
ENSMUSG00000009905	ENSMUST00000010049;ENSMUST00000187319;ENSMUST00000187617	70750	Kdsr	3-ketodihydrosphingosine reductase [Source:MGI Symbol;Acc:MGI:1918000]	1	106648189	106687457	39269	-	466	469	460	760	802	756	690	727	1416	1076	726	447	365	517	634	596	532
ENSMUSG00000009907	ENSMUST00000094646;ENSMUST00000112736;ENSMUST00000126057;ENSMUST00000127606;ENSMUST00000147705;ENSMUST00000190531	20479	Vps4b	vacuolar protein sorting 4B [Source:MGI Symbol;Acc:MGI:1100499]	1	106691801	106724458	32658	-	1376	1448	1334	1430	1352	1171	1572	1734	1635	1091	1315	1382	1361	1687	807	1732	936
ENSMUSG00000009927	ENSMUST00000080300;ENSMUST00000213116;ENSMUST00000215610;ENSMUST00000216076;ENSMUST00000216867;ENSMUST00000217231;ENSMUST00000217620	75617	Rps25	ribosomal protein S25 [Source:MGI Symbol;Acc:MGI:1922867]	9	44318436	44321724	3289	+	4032.51	5470	4193.15	7489	6143.09	13321	5340.98	5821.42	21745.2	17272.1	5294	5089	4130.09	5348.4	5132.92	5698.32	6313
ENSMUSG00000009995	ENSMUST00000069722;ENSMUST00000114180;ENSMUST00000114182;ENSMUST00000124200;ENSMUST00000124915;ENSMUST00000125972;ENSMUST00000131116;ENSMUST00000132437;ENSMUST00000134432;ENSMUST00000134914;ENSMUST00000134936;ENSMUST00000135012;ENSMUST00000135504;ENSMUST00000146260;ENSMUST00000147844;ENSMUST00000149055;ENSMUST00000153459;ENSMUST00000156072;ENSMUST00000156212;ENSMUST00000156788;ENSMUST00000156880;…	66826	Tafazzin	tafazzin, phospholipid-lysophospholipid transacylase [Source:MGI Symbol;Acc:MGI:109626]	X	73325518	73333757	8240	+	595	734	608	879	772	893	640	773	1317	843	539	793	689	920	528	632	626
ENSMUSG00000010025	ENSMUST00000066277;ENSMUST00000074127;ENSMUST00000108715;ENSMUST00000128991;ENSMUST00000141368;ENSMUST00000147291;ENSMUST00000149298;ENSMUST00000208086	11671	Aldh3a2	aldehyde dehydrogenase family 3, subfamily A2 [Source:MGI Symbol;Acc:MGI:1353452]	11	61114243	61158290	44048	-	5941	7362	4404	6613	8024	4867	5294	4302	6425	4035	6269	4603	6098	8274	3376	4672	3733
ENSMUSG00000010045	ENSMUST00000010189	56395	Tmem115	transmembrane protein 115 [Source:MGI Symbol;Acc:MGI:1930765]	9	107411144	107415872	4729	+	563	555	596	375	416	205	642	607	349	204	576	709	498	699	218	433	254
ENSMUSG00000010047	ENSMUST00000010191;ENSMUST00000192887;ENSMUST00000193747;ENSMUST00000194794;ENSMUST00000195667;ENSMUST00000195681;ENSMUST00000195752	15587	Hyal2	hyaluronoglucosaminidase 2 [Source:MGI Symbol;Acc:MGI:1196334]	9	107445144	107449978	4835	+	896	992	958	801	893	557	1257	994	784	634	1278	878	759	1250	574	639	601
ENSMUSG00000010048	ENSMUST00000010192;ENSMUST00000192888;ENSMUST00000193140;ENSMUST00000193153;ENSMUST00000194932;ENSMUST00000195725;ENSMUST00000195746	15983	Ifrd2	interferon-related developmental regulator 2 [Source:MGI Symbol;Acc:MGI:1316708]	9	107464841	107470584	5744	+	1009	971	878	920	980	675	1251	1241	1249	780	1111	981	731	1065	427	694	579
ENSMUSG00000010051	ENSMUST00000010195;ENSMUST00000112387;ENSMUST00000123005;ENSMUST00000144392;ENSMUST00000184695	15586	Hyal1	hyaluronoglucosaminidase 1 [Source:MGI Symbol;Acc:MGI:96298]	9	107454126	107458909	4784	+	1162.97	1207.63	985.11	532.19	480.43	143.32	1141.83	997.55	284.48	126.17	1086.15	1102.68	928.27	1702.29	342.11	1039.56	561.01
ENSMUSG00000010054	ENSMUST00000010198;ENSMUST00000193292;ENSMUST00000193418	80385	Tusc2	tumor suppressor 2, mitochondrial calcium regulator [Source:MGI Symbol;Acc:MGI:1931086]	9	107440454	107443311	2858	+	699	732	775	929	983	1035	849	786	1396	1155	707	758	590	835	559	583	489
ENSMUSG00000010057	ENSMUST00000010201;ENSMUST00000192951;ENSMUST00000193628;ENSMUST00000194848;ENSMUST00000195370	56032	Nprl2	NPR2 like, GATOR1 complex subunit [Source:MGI Symbol;Acc:MGI:1914482]	9	107419425	107422905	3481	+	315	386	335	306	275	280	272	333	405	285	233	337	270	402	200	272	244
ENSMUSG00000010064	ENSMUST00000010208;ENSMUST00000167868;ENSMUST00000177567;ENSMUST00000191923;ENSMUST00000192211;ENSMUST00000192323;ENSMUST00000192990;ENSMUST00000193495;ENSMUST00000193932;ENSMUST00000194230;ENSMUST00000194895;ENSMUST00000195033;ENSMUST00000195739;ENSMUST00000195843	76257	Slc38a3	solute carrier family 38, member 3 [Source:MGI Symbol;Acc:MGI:1923507]	9	107527833	107546729	18897	-	40653	42254	41898	27920	25011	12871	41412	47388	17351	10752	45249	30950	24610	34106	12645	41935	23242
ENSMUSG00000010067	ENSMUST00000010211;ENSMUST00000093786;ENSMUST00000121635;ENSMUST00000122225;ENSMUST00000125080;ENSMUST00000125386;ENSMUST00000129320;ENSMUST00000144129;ENSMUST00000156198;ENSMUST00000191832	56289	Rassf1	Ras association (RalGDS/AF-6) domain family member 1 [Source:MGI Symbol;Acc:MGI:1928386]	9	107428754	107439466	10713	+	145	156	208	165	188	225	341	373	493	287	261	198	142	209	128	147	116
ENSMUSG00000010095	ENSMUST00000010239;ENSMUST00000170157;ENSMUST00000205377;ENSMUST00000205463;ENSMUST00000205538;ENSMUST00000206560;ENSMUST00000206598;ENSMUST00000206797;ENSMUST00000206895	17254	Slc3a2	solute carrier family 3 (activators of dibasic and neutral amino acid transport), member 2 [Source:MGI Symbol;Acc:MGI:96955]	19	8684246	8700733	16488	-	738	700	734	584	646	357	862	1089	649	322	680	868	723	899	279	457	315
ENSMUSG00000010097	ENSMUST00000010241;ENSMUST00000183780;ENSMUST00000183898;ENSMUST00000183939;ENSMUST00000184387;ENSMUST00000184756;ENSMUST00000184808;ENSMUST00000184826;ENSMUST00000184970;ENSMUST00000185056	53319	Nxf1	nuclear RNA export factor 1 [Source:MGI Symbol;Acc:MGI:1858330]	19	8734437	8748286	13850	+	913	862	978	709	708	400	1105	1220	789	444	851	1271	882	1027	471	1054	595
ENSMUSG00000010110	ENSMUST00000010254;ENSMUST00000073430;ENSMUST00000175642;ENSMUST00000175834;ENSMUST00000175872;ENSMUST00000175901;ENSMUST00000176009;ENSMUST00000176013;ENSMUST00000176093;ENSMUST00000176182;ENSMUST00000176260;ENSMUST00000176314;ENSMUST00000176381;ENSMUST00000176404;ENSMUST00000176570;ENSMUST00000176844;ENSMUST00000176968;ENSMUST00000177322;ENSMUST00000177373	56389	Stx5a	syntaxin 5A [Source:MGI Symbol;Acc:MGI:1928483]	19	8718777	8733433	14657	+	1040	995	976	912	903	719	1502	1415	1169	751	1008	2286	1484	1724	563	869	677
ENSMUSG00000010122	ENSMUST00000010267;ENSMUST00000131723;ENSMUST00000147583;ENSMUST00000148671	67473	Slc47a1	solute carrier family 47, member 1 [Source:MGI Symbol;Acc:MGI:1914723]	11	61234227	61269171	34945	-	1991	2461	2272	2318	2253	1452	2394	2570	2430	1428	2365	1836	2204	2618	924	2408	1249
ENSMUSG00000010142	ENSMUST00000010286;ENSMUST00000101103;ENSMUST00000123378;ENSMUST00000130708;ENSMUST00000137832;ENSMUST00000139422;ENSMUST00000146033	57916	Tnfrsf13b	tumor necrosis factor receptor superfamily, member 13b [Source:MGI Symbol;Acc:MGI:1889411]	11	61017581	61040198	22618	+	2	9	4	10	16	17	57	30	41	12	25	6	4	8	3	5	1
ENSMUSG00000010175	ENSMUST00000010319;ENSMUST00000175916;ENSMUST00000177288	19130	Prox1	prospero homeobox 1 [Source:MGI Symbol;Acc:MGI:97772]	1	189850232	189902911	52680	-	3310	2069	1708	2488	1835	1072	3207	2715	1187	995	1952	3554	2168	2948	660	2655	948
ENSMUSG00000010205	ENSMUST00000115487	71766	Raver1	ribonucleoprotein, PTB-binding 1 [Source:MGI Symbol;Acc:MGI:1919016]	9	20985454	21003304	17851	-	439.54	399.85	386.75	317.81	292.01	88.69	714.8	698.58	194.93	99.14	459.58	679.79	462.76	550.72	119.5	458.07	229.33
ENSMUSG00000010277	ENSMUST00000010421;ENSMUST00000125459;ENSMUST00000126928;ENSMUST00000132756;ENSMUST00000136184;ENSMUST00000141331;ENSMUST00000145145;ENSMUST00000147432	72503	Bltp2	bridge-like lipid transfer protein family member 2 [Source:MGI Symbol;Acc:MGI:1919753]	11	78152578	78181449	28872	+	4025	3875	4164	2969	2416	1246	4312	5137	1752	1002	3942	4689	4215	5716	1518	5120	2398
ENSMUSG00000010290	ENSMUST00000010434	98404	AI597479	expressed sequence AI597479 [Source:MGI Symbol;Acc:MGI:2138299]	1	43137870	43155107	17238	+	324	294	289	421	353	461	277	303	641	439	238	318	267	345	337	392	316
ENSMUSG00000010307	ENSMUST00000010451;ENSMUST00000211066	67893	Tmem86a	transmembrane protein 86A [Source:MGI Symbol;Acc:MGI:1915143]	7	46700349	46704525	4177	+	111	123	111	213	236	282	476	379	481	350	493	99	80	126	87	110	110
ENSMUSG00000010358	ENSMUST00000010502;ENSMUST00000125958;ENSMUST00000131024	70110	Ifi35	interferon-induced protein 35 [Source:MGI Symbol;Acc:MGI:1917360]	11	101339233	101349524	10292	+	529	637	463	605	510	462	609	812	808	346	558	616	445	578	374	441	398
ENSMUSG00000010362	ENSMUST00000010506;ENSMUST00000133727;ENSMUST00000139037;ENSMUST00000152484;ENSMUST00000155222	66599	Rdm1	RAD52 motif 1 [Source:MGI Symbol;Acc:MGI:1913849]	11	101518021	101526926	8906	+	115	181	164	243	207	283	192	277	658	487	193	146	119	177	138	121	158
ENSMUSG00000010376	ENSMUST00000010520;ENSMUST00000227157;ENSMUST00000227250;ENSMUST00000228414	18002	Nedd8	neural precursor cell expressed, developmentally down-regulated gene 8 [Source:MGI Symbol;Acc:MGI:97301]	14	55899720	55909581	9862	-	1157	1332	1161	1451	1397	1613	1498	1615	2937	1765	1318	1234	949	1296	756	1084	820
ENSMUSG00000010392	ENSMUST00000010536;ENSMUST00000137767	53334	Gosr1	golgi SNAP receptor complex member 1 [Source:MGI Symbol;Acc:MGI:1858260]	11	76617428	76654405	36978	-	889	890	878	702	729	391	874	1129	521	313	832	1005	808	1056	400	1113	511
ENSMUSG00000010406	ENSMUST00000010550;ENSMUST00000196273;ENSMUST00000199153;ENSMUST00000199195;ENSMUST00000199689;ENSMUST00000200217;ENSMUST00000228871	68836	Mrpl52	mitochondrial ribosomal protein L52 [Source:MGI Symbol;Acc:MGI:1916086]	14	54664366	54667213	2848	+	575	649	536	650	583	796	591	603	1286	807	487	610	487	626	373	443	426
ENSMUSG00000010453	ENSMUST00000010597;ENSMUST00000185614;ENSMUST00000185621;ENSMUST00000185912;ENSMUST00000186470;ENSMUST00000187628;ENSMUST00000188528;ENSMUST00000188957;ENSMUST00000188961	226976	Kansl3	KAT8 regulatory NSL complex subunit 3 [Source:MGI Symbol;Acc:MGI:1918055]	1	36374811	36408262	33452	-	1560	1491	1634	1079	1116	658	1537	2072	1069	651	1459	996	868	1449	623	1361	825
ENSMUSG00000010517	ENSMUST00000102724;ENSMUST00000143217;ENSMUST00000155204	14084	Faf1	Fas-associated factor 1 [Source:MGI Symbol;Acc:MGI:109419]	4	109533785	109821157	287373	+	832	893	737	858	859	764	836	1127	1323	988	732	856	722	943	611	899	530
ENSMUSG00000010538	ENSMUST00000010682;ENSMUST00000107556;ENSMUST00000123536	76927	Tsacc	TSSK6 activating co-chaperone [Source:MGI Symbol;Acc:MGI:1924177]	3	88190064	88204306	14243	-	9	20	18	20	18	32	10	15	56.94	39	16	12	8	15	14	17	10
ENSMUSG00000010554	ENSMUST00000010698;ENSMUST00000092912;ENSMUST00000128504;ENSMUST00000134571;ENSMUST00000141755;ENSMUST00000144692	67493	Mettl16	methyltransferase 16, N6-methyladenosine [Source:MGI Symbol;Acc:MGI:1914743]	11	74661656	74719351	57696	+	264	306	321	281	190	149	355	374	248	140	288	394	293	430	112	238	118
ENSMUSG00000010601	ENSMUST00000010745;ENSMUST00000175789;ENSMUST00000175919;ENSMUST00000176074;ENSMUST00000177135	75761	Apol7a	apolipoprotein L 7a [Source:MGI Symbol;Acc:MGI:1923011]	15	77272419	77283310	10892	-	2100	3067	1715	3607	2807	2836	2065	3034	4431	2606	2201	2022	2227	2756	1430	2696	2114
ENSMUSG00000010607	ENSMUST00000123680;ENSMUST00000148088	66268	Pigyl	phosphatidylinositol glycan anchor biosynthesis, class Y-like [Source:MGI Symbol;Acc:MGI:1913518]	9	22068142	22069654	1513	+	453	490	522	677	664	973	413	451	1205	870	358	436	341	519	313	284	310
ENSMUSG00000010608	ENSMUST00000048155;ENSMUST00000181983;ENSMUST00000182004;ENSMUST00000182032;ENSMUST00000182036;ENSMUST00000182255;ENSMUST00000182347;ENSMUST00000182450;ENSMUST00000182618;ENSMUST00000182633;ENSMUST00000182840;ENSMUST00000182881;ENSMUST00000183039;ENSMUST00000183128;ENSMUST00000183154;ENSMUST00000183181;ENSMUST00000183242;ENSMUST00000183282	67039	Rbm25	RNA binding motif protein 25 [Source:MGI Symbol;Acc:MGI:1914289]	12	83678010	83729897	51888	+	1319	1257	1088	953	872	666	1413	1740	1087	733	1076	1413	1067	1197	454	1677	612
ENSMUSG00000010609	ENSMUST00000010753;ENSMUST00000111104;ENSMUST00000111105;ENSMUST00000111106;ENSMUST00000111108;ENSMUST00000128223;ENSMUST00000130029;ENSMUST00000130711;ENSMUST00000133340;ENSMUST00000136291;ENSMUST00000149590;ENSMUST00000193897	19165	Psen2	presenilin 2 [Source:MGI Symbol;Acc:MGI:109284]	1	180054569	180091003	36435	-	3693	4219	4290	5165	3951	3701	2844	2858	3681	2262	2989	3691	3790	4964	1535	1869	1314
ENSMUSG00000010651	ENSMUST00000010795;ENSMUST00000127952	235674	Acaa1b	acetyl-Coenzyme A acyltransferase 1B [Source:MGI Symbol;Acc:MGI:3605455]	9	118977091	118986161	9071	-	25954.6	28933.4	18124.6	32673.5	31269.3	17522.6	14097.7	15474.1	21054.2	11970.8	19733.4	15088	16560.7	24587.2	10178.9	11121.3	10682.8
ENSMUSG00000010660	ENSMUST00000010804;ENSMUST00000213464;ENSMUST00000214470;ENSMUST00000214491	18799	Plcd1	phospholipase C, delta 1 [Source:MGI Symbol;Acc:MGI:97614]	9	118900595	118922570	21976	-	12	9	18	14	8	13	20	14	14	20	21	15	6	10	6	7	5
ENSMUSG00000010663	ENSMUST00000010807;ENSMUST00000235160;ENSMUST00000235515;ENSMUST00000236385;ENSMUST00000236594;ENSMUST00000237221;ENSMUST00000237861;ENSMUST00000238115	76267	Fads1	fatty acid desaturase 1 [Source:MGI Symbol;Acc:MGI:1923517]	19	10160252	10174241	13990	+	7383	7370	10240	3850	2256	3488	3784	6917	3278	3041	6455	11690	9474	11549	3093	7784	4335
ENSMUSG00000010721	ENSMUST00000055195;ENSMUST00000179191;ENSMUST00000196321;ENSMUST00000198105;ENSMUST00000198367;ENSMUST00000200149;ENSMUST00000200564	56873	Lmbr1	limb region 1 [Source:MGI Symbol;Acc:MGI:1861746]	5	29434800	29583388	148589	-	101	101	120	129	130	145	100	118	208	136	107	87	100	124	88	129	104
ENSMUSG00000010751	ENSMUST00000075588;ENSMUST00000084396;ENSMUST00000146692;ENSMUST00000171066	79202	Tnfrsf22	tumor necrosis factor receptor superfamily, member 22 [Source:MGI Symbol;Acc:MGI:1930270]	7	143188543	143203398	14856	-	11	7	20	9	8.86	6	34.13	29.08	8.21	5	17.37	17	13	17	3	8	5
ENSMUSG00000010755	ENSMUST00000010899;ENSMUST00000105909;ENSMUST00000134128;ENSMUST00000134753;ENSMUST00000135032;ENSMUST00000146462;ENSMUST00000146904;ENSMUST00000151574;ENSMUST00000154022;ENSMUST00000207168;ENSMUST00000208575	27267	Cars1	cysteinyl-tRNA synthetase 1 [Source:MGI Symbol;Acc:MGI:1351477]	7	143110967	143153827	42861	-	693	485	514	487	423	497	588	734	545	348	476	1073	693	964	463	594	363
ENSMUSG00000010760	ENSMUST00000010904;ENSMUST00000207425;ENSMUST00000207561	22113	Phlda2	pleckstrin homology like domain, family A, member 2 [Source:MGI Symbol;Acc:MGI:1202307]	7	143055282	143056887	1606	-	2	3	13	12	8	9	13	8	21	8	16	1	3	5	2	4	7
ENSMUSG00000010797	ENSMUST00000010941	22413	Wnt2	wingless-type MMTV integration site family, member 2 [Source:MGI Symbol;Acc:MGI:98954]	6	17988939	18030584	41646	-	44	40	30	85	86	132	55	45	78	66	35	54	35	46	30	21	33
ENSMUSG00000010830	ENSMUST00000010974	105785	Kdelr3	KDEL (Lys-Asp-Glu-Leu) endoplasmic reticulum protein retention receptor 3 [Source:MGI Symbol;Acc:MGI:2145953]	15	79400612	79411940	11329	+	5	10	8	29	30	44	56	38	57	62	48	13	3	11	10	13	9
ENSMUSG00000010911	ENSMUST00000011055;ENSMUST00000124540;ENSMUST00000147131;ENSMUST00000155004	56369	Apip	APAF1 interacting protein [Source:MGI Symbol;Acc:MGI:1926788]	2	102904020	102922989	18970	+	286	413	235	523	424	651	377	440	1252	637	358	267	242	310	316	364	336
ENSMUSG00000010914	ENSMUST00000011058;ENSMUST00000111183;ENSMUST00000132449	27402	Pdhx	pyruvate dehydrogenase complex, component X [Source:MGI Symbol;Acc:MGI:1351627]	2	102851420	102903858	52439	-	723	761	581	964	724	763	642	916	1146	748	650	695	571	676	508	1017	602
ENSMUSG00000010936	ENSMUST00000034190;ENSMUST00000212663;ENSMUST00000212766;ENSMUST00000212829;ENSMUST00000213003;ENSMUST00000213015	234729	Vac14	Vac14 homolog (S. cerevisiae) [Source:MGI Symbol;Acc:MGI:2157980]	8	111345217	111447030	101814	+	487	439	368	363	347	159	537	777	409	186	497	608	473	571	168	525	247
ENSMUSG00000011008	ENSMUST00000011152;ENSMUST00000098524;ENSMUST00000169533;ENSMUST00000169984;ENSMUST00000170972	68279	Mcoln2	mucolipin 2 [Source:MGI Symbol;Acc:MGI:1915529]	3	145855588	145901268	45681	+	4	3	6	10	15	12	32	28	50	15	11	7	4	4	2	3	5
ENSMUSG00000011034	ENSMUST00000011178	20537	Slc5a1	solute carrier family 5 (sodium/glucose cotransporter), member 1 [Source:MGI Symbol;Acc:MGI:107678]	5	33261563	33320214	58652	+	21	26	24	30	18	19	34	37	21	18	25	16	25	21	22	47	14
ENSMUSG00000011096	ENSMUST00000054343;ENSMUST00000107880;ENSMUST00000107882;ENSMUST00000107885;ENSMUST00000127783;ENSMUST00000136232;ENSMUST00000141311;ENSMUST00000142880;ENSMUST00000150335;ENSMUST00000152091;ENSMUST00000207223;ENSMUST00000208384	67605	Akt1s1	AKT1 substrate 1 [Source:MGI Symbol;Acc:MGI:1914855]	7	44498415	44504845	6431	+	1055	974	1004	739	852	457	877	888	693	488	833	976	753	1135	381	453	419
ENSMUSG00000011114	ENSMUST00000117654;ENSMUST00000126062;ENSMUST00000134711;ENSMUST00000142736	21376	Tbrg1	transforming growth factor beta regulated gene 1 [Source:MGI Symbol;Acc:MGI:1100877]	9	37560059	37568608	8550	-	659	851	700	1019	727	998	907	982	1498	1021	889	1052	746	837	589	701	525
ENSMUSG00000011148	ENSMUST00000021726;ENSMUST00000180015;ENSMUST00000221720;ENSMUST00000223044	11565	Adss1	adenylosuccinate synthase 1 [Source:MGI Symbol;Acc:MGI:87947]	12	112586479	112607794	21316	+	507	677	585	643	672	485	914	819	636	456	666	495	433	591	238	551	299
ENSMUSG00000011158	ENSMUST00000011302;ENSMUST00000221409;ENSMUST00000221415;ENSMUST00000221537;ENSMUST00000221680;ENSMUST00000221754;ENSMUST00000222247;ENSMUST00000223037;ENSMUST00000223506	72308	Brf1	BRF1, RNA polymerase III transcription initiation factor 90 kDa subunit [Source:MGI Symbol;Acc:MGI:1919558]	12	112923705	112964324	40620	-	373	337	365	253	240	150	335	442	235	136	364	377	299	445	146	260	187
ENSMUSG00000011179	ENSMUST00000171737;ENSMUST00000220849;ENSMUST00000220947;ENSMUST00000221354;ENSMUST00000221613;ENSMUST00000221701;ENSMUST00000222250;ENSMUST00000222617	18263	Odc1	ornithine decarboxylase, structural 1 [Source:MGI Symbol;Acc:MGI:97402]	12	17594795	17601506	6712	+	1657	1909	1712	1622	1242	1325	2952	5394.99	4176	2953	2434	2639	1859	2639	1333	2066.97	1705
ENSMUSG00000011254	ENSMUST00000011398;ENSMUST00000109254;ENSMUST00000131182;ENSMUST00000133238;ENSMUST00000133851	66628	Thg1l	tRNA-histidine guanylyltransferase 1-like (S. cerevisiae) [Source:MGI Symbol;Acc:MGI:1913878]	11	45837670	45846321	8652	-	50	53	50	48	57	47	70	85	78	38	53	71	44	52	32	48	41
ENSMUSG00000011256	ENSMUST00000011400;ENSMUST00000137014;ENSMUST00000151565;ENSMUST00000153410	11492	Adam19	ADAM metallopeptidase domain 19 [Source:MGI Symbol;Acc:MGI:105377]	11	45946819	46038170	91352	+	24	32	25	35	35	27	100	51	17	26	45	40	27	30	9	25	11
ENSMUSG00000011257	ENSMUST00000078734;ENSMUST00000080178;ENSMUST00000106241;ENSMUST00000106243;ENSMUST00000124991;ENSMUST00000146156;ENSMUST00000156807;ENSMUST00000183940	230721	Pabpc4	poly(A) binding protein, cytoplasmic 4 [Source:MGI Symbol;Acc:MGI:2385206]	4	123156144	123192718	36575	+	1040.29	976.15	1028.03	666.57	612.25	338.82	1266.65	1475.66	518.51	429.71	1186.44	1298.65	818.26	1169.73	469.52	1033.79	612.96
ENSMUSG00000011263	ENSMUST00000137613	74463	Exoc3l2	exocyst complex component 3-like 2 [Source:MGI Symbol;Acc:MGI:1921713]	7	19197256	19230687	33432	+	113	100	83	110	109	97	115	181	83	56	108	172	138	214	37	98	53
ENSMUSG00000011267	ENSMUST00000108453;ENSMUST00000208314	63872	Zfp296	zinc finger protein 296 [Source:MGI Symbol;Acc:MGI:1926956]	7	19311212	19314581	3370	+	4	17	12	9	3	2	9	6	4	4	10	7	8	13	0	7	3
ENSMUSG00000011305	ENSMUST00000019808;ENSMUST00000113072	66968	Plin5	perilipin 5 [Source:MGI Symbol;Acc:MGI:1914218]	17	56418601	56424596	5996	-	480	419	971	495	490	275	581	455	356	460	909	673	692	925	302	347	225
ENSMUSG00000011306	ENSMUST00000011450;ENSMUST00000211808;ENSMUST00000213035	70616	Sugp1	SURP and G patch domain containing 1 [Source:MGI Symbol;Acc:MGI:1917866]	8	70495463	70524997	29535	+	303	329	342	311	239	210	422	530	299	163	324	469	325	478	166	326	190
ENSMUSG00000011382	ENSMUST00000011526;ENSMUST00000209450;ENSMUST00000210440	71755	Dhdh	dihydrodiol dehydrogenase [Source:MGI Symbol;Acc:MGI:1919005]	7	45120411	45138229	17819	-	4303.46	5347.85	4290.01	5399.01	4203.88	4459.24	3378.12	4643.55	5565.65	3690.79	3788.57	3144	3438	4704.36	3348.56	5160.92	3700
ENSMUSG00000011427	ENSMUST00000032796;ENSMUST00000178162;ENSMUST00000207328	233056	Zfp790	zinc finger protein 790 [Source:MGI Symbol;Acc:MGI:1923431]	7	29515539	29530430	14892	+	138	170	177	121	122	107	180	218	128	81	170	219	157	224	55	227	76
ENSMUSG00000011658	ENSMUST00000071207;ENSMUST00000207069;ENSMUST00000207154;ENSMUST00000207426;ENSMUST00000207480;ENSMUST00000207485;ENSMUST00000207833;ENSMUST00000207939;ENSMUST00000208179;ENSMUST00000208291;ENSMUST00000208600;ENSMUST00000208908;ENSMUST00000209039;ENSMUST00000209132;ENSMUST00000209163	70300	Fuz	fuzzy planar cell polarity protein [Source:MGI Symbol;Acc:MGI:1917550]	7	44545503	44552055	6553	+	221	211	220	205	159	173	184	148	203	120	173	250	170	216	142	188	188
ENSMUSG00000011752	ENSMUST00000011896;ENSMUST00000235468;ENSMUST00000237510	18648	Pgam1	phosphoglycerate mutase 1 [Source:MGI Symbol;Acc:MGI:97552]	19	41900362	41907099	6738	+	5458.99	5782.38	6042.58	6146.41	5269.32	4976	5958.84	6586.4	7460.67	5145.61	6074.45	5253.91	4817.77	6076.36	3207.15	5413.96	3682.34
ENSMUSG00000011831	ENSMUST00000112642;ENSMUST00000124034;ENSMUST00000124590;ENSMUST00000127579;ENSMUST00000128723;ENSMUST00000132406;ENSMUST00000132482;ENSMUST00000133411;ENSMUST00000136677;ENSMUST00000138111;ENSMUST00000141673;ENSMUST00000155897;ENSMUST00000155955	14020	Evi5	ecotropic viral integration site 5 [Source:MGI Symbol;Acc:MGI:104736]	5	107892661	108022973	130313	-	3163	3476	3427	3875	3483	3031	3384	3849.99	4287.99	2890	2955	3428	3327	4287	1933	3462.99	2080
ENSMUSG00000011832	ENSMUST00000175650;ENSMUST00000176072;ENSMUST00000176149;ENSMUST00000176186;ENSMUST00000176462;ENSMUST00000176645;ENSMUST00000176764;ENSMUST00000176825;ENSMUST00000177053;ENSMUST00000177077;ENSMUST00000177085;ENSMUST00000177309;ENSMUST00000177455;ENSMUST00000177499;ENSMUST00000239400	213027	Evi5l	ecotropic viral integration site 5 like [Source:MGI Symbol;Acc:MGI:2442167]	8	4216567	4261257	44691	+	96	75	119	94	90	51	113	147	70	58	121	119	112	147	40	88	49
ENSMUSG00000011837	ENSMUST00000011981;ENSMUST00000208110;ENSMUST00000208316;ENSMUST00000208459	102209	Snapc2	small nuclear RNA activating complex, polypeptide 2 [Source:MGI Symbol;Acc:MGI:1914861]	8	4303080	4306220	3141	+	234	215	241	196	213	110	325	301	236	142	251	243	203	279	98	169	115
ENSMUSG00000011877	ENSMUST00000037285;ENSMUST00000100812;ENSMUST00000127302;ENSMUST00000128796;ENSMUST00000139410;ENSMUST00000152428	216963	Git1	GIT ArfGAP 1 [Source:MGI Symbol;Acc:MGI:1927140]	11	77384388	77398612	14225	+	233	199	303	176	180	41	446	437	102	65	382	280	239	272	85	235	110
ENSMUSG00000011884	ENSMUST00000012028;ENSMUST00000112212;ENSMUST00000112214	56356	Gltp	glycolipid transfer protein [Source:MGI Symbol;Acc:MGI:1929253]	5	114807459	114829045	21587	-	52	57	69	61	62	50	256	202	120	56	181	60	35	66	11	35	16
ENSMUSG00000011958	ENSMUST00000034754;ENSMUST00000085393;ENSMUST00000117450;ENSMUST00000133307;ENSMUST00000137472;ENSMUST00000143049;ENSMUST00000154772;ENSMUST00000165389	12175	Bnip2	BCL2/adenovirus E1B interacting protein 2 [Source:MGI Symbol;Acc:MGI:109327]	9	69896748	69915599	18852	+	875	1019	969	1174	1007	1322	1135	1335	2199	1716	982	874	706	918	685	1059	855
ENSMUSG00000011960	ENSMUST00000012104;ENSMUST00000130921;ENSMUST00000163180;ENSMUST00000164294;ENSMUST00000164565;ENSMUST00000168928;ENSMUST00000169674;ENSMUST00000169707;ENSMUST00000170452	12455	Ccnt1	cyclin T1 [Source:MGI Symbol;Acc:MGI:1328363]	15	98436570	98468804	32235	-	659	602	615	484	491	418	517	624	480	409	622	559	500	683	331	997	432
ENSMUSG00000012017	ENSMUST00000012161;ENSMUST00000231301;ENSMUST00000231329;ENSMUST00000231383;ENSMUST00000232577	224024	Scarf2	scavenger receptor class F, member 2 [Source:MGI Symbol;Acc:MGI:1858430]	16	17615146	17626157	11012	+	81	80	70	46	45	32	83	91	45	25	101	118	63	114	29	65	42
ENSMUSG00000012076	ENSMUST00000059250;ENSMUST00000217721;ENSMUST00000218779;ENSMUST00000219337;ENSMUST00000219419;ENSMUST00000219575;ENSMUST00000220400	52592	Brms1l	breast cancer metastasis-suppressor 1-like [Source:MGI Symbol;Acc:MGI:1196337]	12	55883109	55916521	33413	+	66	58	75	111	85	114	118	142	155	98	84	93	88	83	54	103	55
ENSMUSG00000012114	ENSMUST00000012259;ENSMUST00000080936;ENSMUST00000231231;ENSMUST00000231413;ENSMUST00000231480;ENSMUST00000231494;ENSMUST00000231674;ENSMUST00000231754;ENSMUST00000232005;ENSMUST00000232012;ENSMUST00000232163;ENSMUST00000232202;ENSMUST00000232236;ENSMUST00000232312;ENSMUST00000232401;ENSMUST00000232431;ENSMUST00000232645;ENSMUST00000232667	94112	Med15	mediator complex subunit 15 [Source:MGI Symbol;Acc:MGI:2137379]	16	17469072	17550755	81684	-	553	553	563	489	428	204	728	878	344	209	605	791	521	713	190	610	297
ENSMUSG00000012117	ENSMUST00000012262;ENSMUST00000105885;ENSMUST00000105886;ENSMUST00000105887;ENSMUST00000105889;ENSMUST00000130464;ENSMUST00000134096;ENSMUST00000142660;ENSMUST00000144668;ENSMUST00000146241;ENSMUST00000150729	67422	Dhdds	dehydrodolichyl diphosphate synthase [Source:MGI Symbol;Acc:MGI:1914672]	4	133696339	133728229	31891	-	724	764	623	671	474	415	778	898	460	259	644	1083	821	927	325	725	449
ENSMUSG00000012123	ENSMUST00000121391;ENSMUST00000132872;ENSMUST00000137053;ENSMUST00000137529;ENSMUST00000140125;ENSMUST00000143295;ENSMUST00000146102;ENSMUST00000149080;ENSMUST00000149504;ENSMUST00000149956;ENSMUST00000153392;ENSMUST00000219402;ENSMUST00000227683	230806	Crybg2	crystallin beta-gamma domain containing 2 [Source:MGI Symbol;Acc:MGI:1334463]	4	133788126	133819815	31690	+	20	21	11	30	25	16	36	15	14	5	19	14	26	21	12	23	15
ENSMUSG00000012187	ENSMUST00000012331;ENSMUST00000113524;ENSMUST00000125458;ENSMUST00000134947;ENSMUST00000149732;ENSMUST00000152111	68393	Mogat1	monoacylglycerol O-acyltransferase 1 [Source:MGI Symbol;Acc:MGI:1915643]	1	78487628	78514810	27183	+	0	4	2	33	33	7	10	7	25	5	4	3	5	10	3	6	10
ENSMUSG00000012296	ENSMUST00000012440;ENSMUST00000164342;ENSMUST00000180283;ENSMUST00000224055;ENSMUST00000224090;ENSMUST00000224230;ENSMUST00000224404;ENSMUST00000224445;ENSMUST00000224696;ENSMUST00000224901;ENSMUST00000225080;ENSMUST00000225288;ENSMUST00000225359;ENSMUST00000225413;ENSMUST00000225741;ENSMUST00000225915;ENSMUST00000225943	74094	Tjap1	tight junction associated protein 1 [Source:MGI Symbol;Acc:MGI:1921344]	17	46568777	46593952	25176	-	154	135	171	115	87	56	286	292	115	47	187	182	142	212	48	149	92
ENSMUSG00000012350	ENSMUST00000090475;ENSMUST00000111174;ENSMUST00000111176;ENSMUST00000125788;ENSMUST00000128546;ENSMUST00000137774;ENSMUST00000140503;ENSMUST00000151265	13661	Ehf	ets homologous factor [Source:MGI Symbol;Acc:MGI:1270840]	2	103093778	103133623	39846	-	20	14	9	17	11	13	47	38	19	13	20	32	17	19	14	23	8
ENSMUSG00000012405	ENSMUST00000079419;ENSMUST00000080281;ENSMUST00000100799;ENSMUST00000112598;ENSMUST00000147121;ENSMUST00000224196	66480	Rpl15	ribosomal protein L15 [Source:MGI Symbol;Acc:MGI:1913730]	14	4198305	4201873	3569	+	4610.4	5518.24	4467.73	6839.67	5997.53	9377.77	6321.03	6520.42	14884.7	11446.6	5996.31	5790.18	4345.32	6032.9	4768.19	4702.24	5579.93
ENSMUSG00000012422	ENSMUST00000012566;ENSMUST00000161457;ENSMUST00000161568	66074	Tmem167	transmembrane protein 167 [Source:MGI Symbol;Acc:MGI:1913324]	13	90237242	90292026	54785	+	985	1085	967	1503	1347	1893	1264	1254	2909	2051	1007	1600	1268	1291	916	1208	1032
ENSMUSG00000012428	ENSMUST00000115421	117167	Steap4	STEAP family member 4 [Source:MGI Symbol;Acc:MGI:1923560]	5	8010457	8032213	21757	+	2324	1861	2261	2239	2679	2170	8175	2800	3110	1916	2806	2299	1352	1905	1423	2642	1366
ENSMUSG00000012429	ENSMUST00000049744;ENSMUST00000221480;ENSMUST00000222292	66308	Mplkip	M-phase specific PLK1 intereacting protein [Source:MGI Symbol;Acc:MGI:1913558]	13	17869777	17874333	4557	+	212	245	213	294	320	363	230	233	419	350	198	180	165	213	163	200	190
ENSMUSG00000012443	ENSMUST00000012587;ENSMUST00000236027	16551	Kif11	kinesin family member 11 [Source:MGI Symbol;Acc:MGI:1098231]	19	37364851	37410307	45457	+	18	27	25	62	65	59	189	572	405	196	232	27	8	21	11	13	7
ENSMUSG00000012483	ENSMUST00000012627;ENSMUST00000159594	68240	Rpa3	replication protein A3 [Source:MGI Symbol;Acc:MGI:1915490]	6	8255936	8259173	3238	-	98	145	121	229	206	377	134	209	801	439	124	75	80	70	132	154	183
ENSMUSG00000012519	ENSMUST00000056157;ENSMUST00000120432;ENSMUST00000135710;ENSMUST00000145862	74568	Mlkl	mixed lineage kinase domain-like [Source:MGI Symbol;Acc:MGI:1921818]	8	112038429	112064809	26381	-	58	78	80	154	102	139	205	150	237	118	197	91	39	54	35	82	38
ENSMUSG00000012535	ENSMUST00000012679;ENSMUST00000115251;ENSMUST00000164325;ENSMUST00000166844;ENSMUST00000167056;ENSMUST00000169302;ENSMUST00000170350;ENSMUST00000170634;ENSMUST00000170647;ENSMUST00000171865;ENSMUST00000201797	320938	Tnpo3	transportin 3 [Source:MGI Symbol;Acc:MGI:1196412]	6	29540826	29609886	69061	-	983	1016	1014	890	659	471	1089	1245	735	453	925	1292	1027	1277	506	1255	543
ENSMUSG00000012609	ENSMUST00000040179;ENSMUST00000040273;ENSMUST00000095536;ENSMUST00000110220;ENSMUST00000110224;ENSMUST00000124701;ENSMUST00000142411;ENSMUST00000153570;ENSMUST00000155448;ENSMUST00000175844;ENSMUST00000175899;ENSMUST00000176008;ENSMUST00000176460;ENSMUST00000176695;ENSMUST00000176937;ENSMUST00000177114;ENSMUST00000177168;ENSMUST00000177188;ENSMUST00000177525;ENSMUST00000220906	320244	Ttll5	tubulin tyrosine ligase-like family, member 5 [Source:MGI Symbol;Acc:MGI:2443657]	12	85871433	86108667	237235	+	264	177	213	101	104	47	184	253	99	59	178	168	158	249	68	273	124
ENSMUSG00000012640	ENSMUST00000012796;ENSMUST00000048015;ENSMUST00000107986;ENSMUST00000135130;ENSMUST00000139061;ENSMUST00000145622;ENSMUST00000151659	69930	Zfp715	zinc finger protein 715 [Source:MGI Symbol;Acc:MGI:1917180]	7	42945621	42962718	17098	-	307	315	361	388	330	492	303	362	600	482	303	301	223	331	321	419	311
ENSMUSG00000012848	ENSMUST00000004554;ENSMUST00000108539;ENSMUST00000131795;ENSMUST00000137329;ENSMUST00000139349;ENSMUST00000147435	20103	Rps5	ribosomal protein S5 [Source:MGI Symbol;Acc:MGI:1097682]	7	12656217	12660613	4397	+	4596	5670	4753	6858	6006	9651	6023	6442	14351	11717	6045	5904	4287	6481	4438	5629	5157
ENSMUSG00000013033	ENSMUST00000045393;ENSMUST00000124355;ENSMUST00000131018;ENSMUST00000131717;ENSMUST00000132500;ENSMUST00000139575;ENSMUST00000141158;ENSMUST00000141661;ENSMUST00000150674;ENSMUST00000152978	330814	Adgrl1	adhesion G protein-coupled receptor L1 [Source:MGI Symbol;Acc:MGI:1929461]	8	84626734	84668583	41850	+	98	90	70	37	39	34	76	96	19	12	85	126	113	141	24	90	40
ENSMUSG00000013076	ENSMUST00000013220;ENSMUST00000160770;ENSMUST00000161171;ENSMUST00000162802;ENSMUST00000162901;ENSMUST00000223132	75723	Amotl1	angiomotin-like 1 [Source:MGI Symbol;Acc:MGI:1922973]	9	14453262	14556352	103091	-	126	121	171	108	98	53	170	219	58	53	164	202	159	185	45	170	60
ENSMUSG00000013089	ENSMUST00000079601;ENSMUST00000165506;ENSMUST00000168774;ENSMUST00000170393;ENSMUST00000170803	104156	Etv5	ets variant 5 [Source:MGI Symbol;Acc:MGI:1096867]	16	22200059	22258469	58411	-	89	111	119	52	70	46	185.96	288	158	49	95	232	160	203	34	99	67
ENSMUSG00000013150	ENSMUST00000013294;ENSMUST00000135959;ENSMUST00000155038	70575	Gfod2	glucose-fructose oxidoreductase domain containing 2 [Source:MGI Symbol;Acc:MGI:1917825]	8	106440486	106485296	44811	-	156	138	149	133	120	70	157	147	107	51	97	230	174	250	45	63	53
ENSMUSG00000013155	ENSMUST00000013299;ENSMUST00000212061;ENSMUST00000212162;ENSMUST00000212716	102124	Enkd1	enkurin domain containing 1 [Source:MGI Symbol;Acc:MGI:2142593]	8	106430283	106434842	4560	-	4	3	11	11	12	11	26	29	13	9	11	9	6	13	2	6	3
ENSMUSG00000013160	ENSMUST00000013304;ENSMUST00000144486	11972	Atp6v0d1	ATPase, H+ transporting, lysosomal V0 subunit D1 [Source:MGI Symbol;Acc:MGI:1201778]	8	106251097	106292679	41583	-	1789	1852	1714	1768	1640	1296	1759	1933	1891	1320	1672	1783	1529	1948	978	1483	1153
ENSMUSG00000013236	ENSMUST00000067538;ENSMUST00000086828;ENSMUST00000143018;ENSMUST00000223642;ENSMUST00000223671;ENSMUST00000223685;ENSMUST00000223691;ENSMUST00000223706;ENSMUST00000223742;ENSMUST00000223783;ENSMUST00000223859;ENSMUST00000224006;ENSMUST00000224193;ENSMUST00000224522;ENSMUST00000224571;ENSMUST00000224777;ENSMUST00000225104;ENSMUST00000225379;ENSMUST00000225381;ENSMUST00000225456;ENSMUST00000225785	19280	Ptprs	protein tyrosine phosphatase receptor type S [Source:MGI Symbol;Acc:MGI:97815]	17	56719426	56783483	64058	-	101	88	89	69	69	62	206	237	122	68	209	93	105	134	33	97	58
ENSMUSG00000013275	ENSMUST00000086559;ENSMUST00000132585;ENSMUST00000146360	98396	Slc41a1	solute carrier family 41, member 1 [Source:MGI Symbol;Acc:MGI:2444823]	1	131755231	131776603	21373	+	129	111	100	130	146	52	294	193	68	43	142	141	101	138	60	237	121
ENSMUSG00000013415	ENSMUST00000013559;ENSMUST00000138513;ENSMUST00000141515;ENSMUST00000146586;ENSMUST00000152896	140486	Igf2bp1	insulin-like growth factor 2 mRNA binding protein 1 [Source:MGI Symbol;Acc:MGI:1890357]	11	95847989	95896766	48778	-	0	1	0	0	1	0	14	71	39	11	9	0	0	0	0	0	2
ENSMUSG00000013419	ENSMUST00000093772;ENSMUST00000213743;ENSMUST00000214732;ENSMUST00000215081	270210	Zbtb47	zinc finger and BTB domain containing 47 [Source:MGI Symbol;Acc:MGI:2670992]	9	121588396	121600808	12413	+	11	15	20	9	13	10	67	63	35	30	50	18	14	13	11	11	9
ENSMUSG00000013465	ENSMUST00000059849;ENSMUST00000124900;ENSMUST00000128876;ENSMUST00000129140;ENSMUST00000138199;ENSMUST00000140934;ENSMUST00000146729;ENSMUST00000147890	58202	Nelfb	negative elongation factor complex member B [Source:MGI Symbol;Acc:MGI:1931035]	2	25089724	25101501	11778	-	515	528	599	500	438	334	588	686	493	260	571	691	568	745	299	394	351
ENSMUSG00000013495	ENSMUST00000063272;ENSMUST00000078323;ENSMUST00000120327;ENSMUST00000146207;ENSMUST00000198346;ENSMUST00000200485	72392	Tmem175	transmembrane protein 175 [Source:MGI Symbol;Acc:MGI:1919642]	5	108777636	108796648	19013	+	155	194	184	144	136	105	203	191	140	99	188	217	203	271	78	164	96
ENSMUSG00000013539	ENSMUST00000115628;ENSMUST00000125287;ENSMUST00000128580;ENSMUST00000130752;ENSMUST00000134385;ENSMUST00000142677;ENSMUST00000145203;ENSMUST00000145758;ENSMUST00000150152;ENSMUST00000152684;ENSMUST00000231255;ENSMUST00000231308;ENSMUST00000231372;ENSMUST00000231543;ENSMUST00000231605;ENSMUST00000232073;ENSMUST00000232192;ENSMUST00000232558;ENSMUST00000232588	27883	Tango2	transport and golgi organization 2 [Source:MGI Symbol;Acc:MGI:101825]	16	18118689	18165967	47279	-	762	934	746	1055	925	1267	837	909	1826	1359	909	782	778	914	700	785	727
ENSMUSG00000013593	ENSMUST00000013737;ENSMUST00000111318;ENSMUST00000131286;ENSMUST00000136976;ENSMUST00000138069;ENSMUST00000150108;ENSMUST00000191871;ENSMUST00000194778	226646	Ndufs2	NADH:ubiquinone oxidoreductase core subunit S2 [Source:MGI Symbol;Acc:MGI:2385112]	1	171062422	171078957	16536	-	5524	6148	5904	6576	5427	5346	5595	6034	7312	5420	5468	5153	4785	6310	3463	5444	3470
ENSMUSG00000013622	ENSMUST00000013766;ENSMUST00000200748;ENSMUST00000200800;ENSMUST00000200942;ENSMUST00000201136;ENSMUST00000201174;ENSMUST00000201773;ENSMUST00000201887	381629	Atraid	all-trans retinoic acid induced differentiation factor [Source:MGI Symbol;Acc:MGI:1918918]	5	31205656	31211967	6312	+	1391	1523	1437	1941	1784	1999	1402	1482	2875	2174	1372	1313	1165	1720	1124	1207	1162
ENSMUSG00000013629	ENSMUST00000013773;ENSMUST00000200917;ENSMUST00000200953;ENSMUST00000201182;ENSMUST00000201256;ENSMUST00000201838;ENSMUST00000201844;ENSMUST00000201870;ENSMUST00000202227;ENSMUST00000202391;ENSMUST00000202795;ENSMUST00000202827;ENSMUST00000202967;ENSMUST00000202973	69719	Cad	carbamoyl-phosphate synthetase 2, aspartate transcarbamylase, and dihydroorotase [Source:MGI Symbol;Acc:MGI:1916969]	5	31212124	31235823	23700	+	246	224	200	189	100	103	273	293	136	83	220	719	372	347	66	207	122
ENSMUSG00000013646	ENSMUST00000073128;ENSMUST00000116376;ENSMUST00000127119;ENSMUST00000149701;ENSMUST00000154278	79566	Sh3bp5l	SH3 binding domain protein 5 like [Source:MGI Symbol;Acc:MGI:1933124]	11	58221550	58238554	17005	+	411	394	470	514	420	349	572	733	668	441	478	556	288	485	309	325	342
ENSMUSG00000013662	ENSMUST00000070210;ENSMUST00000235142;ENSMUST00000235412;ENSMUST00000236011;ENSMUST00000236546;ENSMUST00000236701;ENSMUST00000236985;ENSMUST00000237752;ENSMUST00000237933;ENSMUST00000238016	67979	Atad1	ATPase family, AAA domain containing 1 [Source:MGI Symbol;Acc:MGI:1915229]	19	32649038	32717186	68149	-	1441	1522	1435	1667	1397	1271	1555	1735	2072	1415	1309	1572	1270	1500	1184	2022	1116
ENSMUSG00000013663	ENSMUST00000013807;ENSMUST00000140014;ENSMUST00000154806;ENSMUST00000249247	19211	Pten	phosphatase and tensin homolog [Source:MGI Symbol;Acc:MGI:109583]	19	32734897	32803560	68664	+	3772.96	4343.88	4104.96	4153.93	3674.99	3656.95	3934.85	4462.95	4904.74	3768.96	3139.95	3816.89	3854.98	4819.96	2289.96	4576.92	2883.99
ENSMUSG00000013698	ENSMUST00000013842;ENSMUST00000111247;ENSMUST00000125361;ENSMUST00000152432;ENSMUST00000155109	18611	Pea15a	proliferation and apoptosis adaptor protein 15A [Source:MGI Symbol;Acc:MGI:104799]	1	172024295	172034371	10077	-	291	324	384	402	335	331	867	711	528	381	660	480	357	471	143	270	165
ENSMUSG00000013701	ENSMUST00000013845;ENSMUST00000163379;ENSMUST00000168139;ENSMUST00000168813;ENSMUST00000170233;ENSMUST00000170331;ENSMUST00000172052;ENSMUST00000226683	53600	Timm23	translocase of inner mitochondrial membrane 23 [Source:MGI Symbol;Acc:MGI:1858317]	14	31902119	31923855	21737	-	2374.58	2615.57	2181.75	3686.44	3129.49	4347.48	2278.69	2771.42	7237.79	5408.07	2257.71	2703.67	2191.88	2829.58	2260.15	2282.96	2394
ENSMUSG00000013707	ENSMUST00000013851	69769	Tnfaip8l2	tumor necrosis factor, alpha-induced protein 8-like 2 [Source:MGI Symbol;Acc:MGI:1917019]	3	95046832	95049671	2840	-	22	23	19	28	46	70	104	57	110	72	42	22	6	21	6	4	8
ENSMUSG00000013736	ENSMUST00000057578;ENSMUST00000113247;ENSMUST00000113248;ENSMUST00000113249;ENSMUST00000147084;ENSMUST00000154026;ENSMUST00000204782;ENSMUST00000205163	70047	Trnt1	tRNA nucleotidyl transferase, CCA-adding, 1 [Source:MGI Symbol;Acc:MGI:1917297]	6	106746081	106759435	13355	+	424	421	377	583.97	486.96	605.98	499.89	446.9	1050.92	801	422.95	339.96	361	403.86	454	662.97	444.97
ENSMUSG00000013787	ENSMUST00000013931;ENSMUST00000078061;ENSMUST00000097342;ENSMUST00000114033;ENSMUST00000124002;ENSMUST00000124846;ENSMUST00000131915;ENSMUST00000137071;ENSMUST00000138500;ENSMUST00000145201;ENSMUST00000145624;ENSMUST00000146418;ENSMUST00000150786;ENSMUST00000172921	110147	Ehmt2	euchromatic histone lysine N-methyltransferase 2 [Source:MGI Symbol;Acc:MGI:2148922]	17	35117445	35133028	15584	+	1364	1392	1438	1304	1161	758	1972	2087	1172	687	1704	1389	1114	1510	604	1290	788
ENSMUSG00000013822	ENSMUST00000013966;ENSMUST00000166335;ENSMUST00000213233;ENSMUST00000214394;ENSMUST00000216837	66126	Elof1	ELF1 homolog, elongation factor 1 [Source:MGI Symbol;Acc:MGI:1913376]	9	22024285	22028468	4184	-	743	793	764	1090	1048	1642	769	871	2626	2059	717	730	556	766	678	616	758
ENSMUSG00000013833	ENSMUST00000105378;ENSMUST00000163125;ENSMUST00000164705;ENSMUST00000165684;ENSMUST00000166964;ENSMUST00000170375;ENSMUST00000170409	216154	Med16	mediator complex subunit 16 [Source:MGI Symbol;Acc:MGI:2158394]	10	79730542	79744757	14216	-	409	427	395	335	287	124	540	547	199	110	540	396	323	533	150	446	225
ENSMUSG00000013846	ENSMUST00000092640;ENSMUST00000229028;ENSMUST00000229213;ENSMUST00000229742;ENSMUST00000230150	20442	St3gal1	ST3 beta-galactoside alpha-2,3-sialyltransferase 1 [Source:MGI Symbol;Acc:MGI:98304]	15	66974724	67048679	73956	-	2909	1885	2650	1033	1370	578	3302	1830	735	416	1833	6345	3926	5548	524	1870	633
ENSMUSG00000013858	ENSMUST00000052885;ENSMUST00000124536;ENSMUST00000124889;ENSMUST00000126383;ENSMUST00000132080	216157	Tmem259	transmembrane protein 259 [Source:MGI Symbol;Acc:MGI:2177957]	10	79810782	79820164	9383	-	2263	1879	1983	1411	1528	761	2091	2198	1103	698	1964	2150	1710	2618	710	1396	1058
ENSMUSG00000013878	ENSMUST00000014022;ENSMUST00000110573;ENSMUST00000110575;ENSMUST00000110579;ENSMUST00000124757;ENSMUST00000124867;ENSMUST00000140819;ENSMUST00000153528;ENSMUST00000209300;ENSMUST00000209707	77733	Rnf170	ring finger protein 170 [Source:MGI Symbol;Acc:MGI:1924983]	8	26609396	26641818	32423	+	540	594	492	552.9	502	505	528.87	578	655.81	421	420	556.92	523.96	589.9	388.71	704.88	369
ENSMUSG00000013921	ENSMUST00000014065;ENSMUST00000125935;ENSMUST00000126216;ENSMUST00000132844;ENSMUST00000144508;ENSMUST00000145253;ENSMUST00000150892	76686	Clip3	CAP-GLY domain containing linker protein 3 [Source:MGI Symbol;Acc:MGI:1923936]	7	29991153	30007792	16640	+	8	3	8	13	14	4	12	21	9	1	19	11	3	8	4	8	4
ENSMUSG00000013973	ENSMUST00000064950;ENSMUST00000097467;ENSMUST00000111299;ENSMUST00000111300;ENSMUST00000127830;ENSMUST00000129116;ENSMUST00000131653;ENSMUST00000135150;ENSMUST00000142063;ENSMUST00000157015	21945	Dedd	death effector domain-containing [Source:MGI Symbol;Acc:MGI:1333874]	1	171156713	171169899	13187	+	570	565	584	525	510	398	627	670	531	362	546	541	500	675	248	556	324
ENSMUSG00000013974	ENSMUST00000014118	69189	Mcemp1	mast cell expressed membrane protein 1 [Source:MGI Symbol;Acc:MGI:1916439]	8	3715754	3719259	3506	+	0	1	0	2	3	5	8	2	16	2	1	8	2	0	0	0	0
ENSMUSG00000013997	ENSMUST00000111289;ENSMUST00000111295;ENSMUST00000111296;ENSMUST00000136339;ENSMUST00000141357;ENSMUST00000146428;ENSMUST00000148339;ENSMUST00000156856	27045	Nit1	nitrilase 1 [Source:MGI Symbol;Acc:MGI:1350916]	1	171165576	171173214	7639	-	2117	2409	2278	2532	1937	2000	2136	2420	3007	2136	2205	2374	2076	2758	1703	2072	1883
ENSMUSG00000014039	ENSMUST00000095849;ENSMUST00000119200;ENSMUST00000121584;ENSMUST00000126916;ENSMUST00000128917;ENSMUST00000129331;ENSMUST00000131951;ENSMUST00000135505;ENSMUST00000136529;ENSMUST00000142295;ENSMUST00000231599	114604	Prdm15	PR domain containing 15 [Source:MGI Symbol;Acc:MGI:1930121]	16	97592667	97653050	60384	-	123	103	145	119	99	87	115	152	102	83	98	138	92	93	51	190	74
ENSMUSG00000014074	ENSMUST00000014218;ENSMUST00000155649;ENSMUST00000171474	70238	Rnf168	ring finger protein 168 [Source:MGI Symbol;Acc:MGI:1917488]	16	32096277	32120252	23976	+	314	325	249	351	306	314	373	427	567	367	302	385	297	320	220	445	227
ENSMUSG00000014075	ENSMUST00000014220;ENSMUST00000080316;ENSMUST00000131204	66061	Dynlt2b	dynein light chain Tctex-type 2B [Source:MGI Symbol;Acc:MGI:1913311]	16	32238520	32247917	9398	+	18	29	31	43	31	38	42	28	71	52	28	27	20	18	15	30	21
ENSMUSG00000014077	ENSMUST00000014221;ENSMUST00000119172;ENSMUST00000132448;ENSMUST00000137585;ENSMUST00000154406	56398	Chp1	calcineurin-like EF hand protein 1 [Source:MGI Symbol;Acc:MGI:1927185]	2	119378178	119417508	39331	+	7890	6641	5859	4191	4445	2646	5030	6322	3405	2326	4681	7483	5861	7882	3753	6376.99	4128
ENSMUSG00000014158	ENSMUST00000071968;ENSMUST00000112217;ENSMUST00000112219;ENSMUST00000112222;ENSMUST00000112225;ENSMUST00000133019;ENSMUST00000141828;ENSMUST00000212469	63873	Trpv4	transient receptor potential cation channel, subfamily V, member 4 [Source:MGI Symbol;Acc:MGI:1926945]	5	114760213	114796482	36270	-	11	7	18	4	15	3	50	18	9	7	27	8	8	13	3	4	5
ENSMUSG00000014164	ENSMUST00000091583;ENSMUST00000160860	100503085	Klhl3	kelch-like 3 [Source:MGI Symbol;Acc:MGI:2445185]	13	58148042	58261406	113365	-	259	245	316	121	102	42	248	330	70	53	239	197	165	210	47	222	81
ENSMUSG00000014177	ENSMUST00000014321;ENSMUST00000128698;ENSMUST00000140377;ENSMUST00000154176	67510	Tvp23b	trans-golgi network vesicle protein 23B [Source:MGI Symbol;Acc:MGI:1914760]	11	62770281	62807606	37326	+	533	614	565	770	673	955	591	556	1347	1153	560	641	570	579	517	594	548
ENSMUSG00000014195	ENSMUST00000014339;ENSMUST00000128414;ENSMUST00000129346;ENSMUST00000132886;ENSMUST00000136199;ENSMUST00000137688;ENSMUST00000146840;ENSMUST00000148098;ENSMUST00000154972;ENSMUST00000155152;ENSMUST00000239389;ENSMUST00000239391;ENSMUST00000239410;ENSMUST00000239418;ENSMUST00000239426;ENSMUST00000239453;ENSMUST00000239479;ENSMUST00000239482;ENSMUST00000239490;ENSMUST00000239491;ENSMUST00000239494;…	56354	Dnajc7	DnaJ heat shock protein family (Hsp40) member C7 [Source:MGI Symbol;Acc:MGI:1928373]	11	100473644	100511014	37371	-	1005	988	988	678	661	349	1176	1380	580	362	928	1035	928	1144	342	1053	412
ENSMUSG00000014226	ENSMUST00000014370;ENSMUST00000194167;ENSMUST00000195654	12301	Cacybp	calcyclin binding protein [Source:MGI Symbol;Acc:MGI:1270839]	1	160029937	160040445	10509	-	607	723	654	846	661	949	629	751	1577	1202	557	749	634	709	577	762	548
ENSMUSG00000014232	ENSMUST00000040881;ENSMUST00000124849;ENSMUST00000137745;ENSMUST00000139294;ENSMUST00000145150	76779	Cluap1	clusterin associated protein 1 [Source:MGI Symbol;Acc:MGI:1924029]	16	3726665	3759011	32347	+	162.65	146.1	159.68	163.57	168.26	166.05	137.44	182.5	287.5	213.2	130.04	145.85	126.14	136.52	89.58	122.25	64.57
ENSMUSG00000014243	ENSMUST00000072916	69747	Zswim7	zinc finger SWIM-type containing 7 [Source:MGI Symbol;Acc:MGI:1916997]	11	62158050	62172201	14152	-	149	173	184	209	186	216	149	161	259	223	163	123	132	176	116	140	144
ENSMUSG00000014245	ENSMUST00000014389;ENSMUST00000147918	327942	Pigl	phosphatidylinositol glycan anchor biosynthesis, class L [Source:MGI Symbol;Acc:MGI:2681271]	11	62349286	62405243	55958	+	80	90	70	81	77	49	103	86	74	65	114	70	83	101	65	92	65
ENSMUSG00000014294	ENSMUST00000014438	17991	Ndufa2	NADH:ubiquinone oxidoreductase subunit A2 [Source:MGI Symbol;Acc:MGI:1343103]	18	36875385	36877610	2226	-	1409	1731	1503	2079	2039	2439	1775	1580	3576	2611	1599	1505	1242	1828	969	833	990
ENSMUSG00000014301	ENSMUST00000014445;ENSMUST00000131250;ENSMUST00000139534;ENSMUST00000156889;ENSMUST00000229767	66449	Pam16	presequence translocase-asssociated motor 16 [Source:MGI Symbol;Acc:MGI:1913699]	16	4434328	4442852	8525	-	333	362.03	283.14	471.1	397.93	597.15	268.8	320.3	898.29	669.7	295.92	346.27	258.36	411.49	280.69	259.72	329.6
ENSMUSG00000014303	ENSMUST00000014447;ENSMUST00000122896;ENSMUST00000127120;ENSMUST00000135577;ENSMUST00000141682	83396	Glis2	GLIS family zinc finger 2 [Source:MGI Symbol;Acc:MGI:1932535]	16	4412577	4442788	30212	+	24	28	31	28	19	19	152	166	42	26	68	44	27	32	8	28	16
ENSMUSG00000014313	ENSMUST00000014457;ENSMUST00000127999;ENSMUST00000153512;ENSMUST00000155638;ENSMUST00000156915;ENSMUST00000227231	12864	Cox6c	cytochrome c oxidase subunit 6C [Source:MGI Symbol;Acc:MGI:104614]	15	35926032	35938392	12361	-	4939	6351.99	4880	6816	6236	8690	4403	5044	14877	9952	4154	4076	3870	4682	3743	4409	4370
ENSMUSG00000014329	ENSMUST00000014473;ENSMUST00000131445;ENSMUST00000143791;ENSMUST00000144740	83675	Bicc1	BicC family RNA binding protein 1 [Source:MGI Symbol;Acc:MGI:1933388]	10	70758662	70995530	236869	-	75	62	79	84	91	49	545	675	252	154	424	87	82	96	30	129	40
ENSMUSG00000014349	ENSMUST00000100528	268470	Ube2z	ubiquitin-conjugating enzyme E2Z [Source:MGI Symbol;Acc:MGI:1343160]	11	95938258	95956214	17957	-	1243	1138	1459	1127	1087	801	1491	1660	1221	774	1233	1412	1144	1478	539	984	593
ENSMUSG00000014353	ENSMUST00000110325;ENSMUST00000126160;ENSMUST00000143398;ENSMUST00000143686;ENSMUST00000152210	72477	Tmem87b	transmembrane protein 87B [Source:MGI Symbol;Acc:MGI:1919727]	2	128660038	128696181	36144	+	557	626	596	689	620	502	759	728	772	478	644	538	508	629	422	943	479
ENSMUSG00000014355	ENSMUST00000014499;ENSMUST00000110332;ENSMUST00000110333;ENSMUST00000123503;ENSMUST00000124418;ENSMUST00000134485;ENSMUST00000143007;ENSMUST00000145906;ENSMUST00000151171;ENSMUST00000154320;ENSMUST00000154995	17222	Anapc1	anaphase promoting complex subunit 1 [Source:MGI Symbol;Acc:MGI:103097]	2	128452024	128529311	77288	-	912	920	898	991	832	747	1048	1303	1223	740	1023	1112	947	1266	556	1189	688
ENSMUSG00000014361	ENSMUST00000014505;ENSMUST00000140221	17289	Mertk	MER proto-oncogene tyrosine kinase [Source:MGI Symbol;Acc:MGI:96965]	2	128540876	128644814	103939	+	297	300	334	274	311	303	488	526	445	332	393	277	277	365	203	369	216
ENSMUSG00000014402	ENSMUST00000014546;ENSMUST00000140693;ENSMUST00000143413;ENSMUST00000146130;ENSMUST00000156335;ENSMUST00000209538;ENSMUST00000210664;ENSMUST00000211076;ENSMUST00000211595	22088	Tsg101	tumor susceptibility gene 101 [Source:MGI Symbol;Acc:MGI:106581]	7	46538697	46569717	31021	-	813	961	861	913	853.99	781.98	878	1263	1333	890	764	885	850	941.99	568.99	1090.98	692.99
ENSMUSG00000014418	ENSMUST00000014562;ENSMUST00000107653;ENSMUST00000107654;ENSMUST00000123725;ENSMUST00000130365;ENSMUST00000138480;ENSMUST00000142663;ENSMUST00000143627;ENSMUST00000145776;ENSMUST00000152759;ENSMUST00000153789;ENSMUST00000157026;ENSMUST00000211347;ENSMUST00000211471;ENSMUST00000211571	246694	Hps5	HPS5, biogenesis of lysosomal organelles complex 2 subunit 2 [Source:MGI Symbol;Acc:MGI:2180307]	7	46409890	46445488	35599	-	363	361	370	371	341	246	501	464	413	252	415	358	358	441	228	429	271
ENSMUSG00000014426	ENSMUST00000089058;ENSMUST00000232689;ENSMUST00000232931;ENSMUST00000233002;ENSMUST00000233012;ENSMUST00000233252;ENSMUST00000233683;ENSMUST00000233716;ENSMUST00000233755	26407	Map3k4	mitogen-activated protein kinase kinase kinase 4 [Source:MGI Symbol;Acc:MGI:1346875]	17	12446508	12537683	91176	-	540	527	612	465	360	239	595	669	367	206	515	650	531	711	159	574	251
ENSMUSG00000014444	ENSMUST00000067252;ENSMUST00000123671;ENSMUST00000126553;ENSMUST00000128383;ENSMUST00000134304;ENSMUST00000148497;ENSMUST00000152596;ENSMUST00000155803;ENSMUST00000156333	234839	Piezo1	piezo-type mechanosensitive ion channel component 1 [Source:MGI Symbol;Acc:MGI:3603204]	8	123208437	123278068	69632	-	90	81	88	105	76	45	338	350	98	53	257	174	105	162	24	113	39
ENSMUSG00000014470	ENSMUST00000014614;ENSMUST00000136356;ENSMUST00000148780	68718	Rnf166	ring finger protein 166 [Source:MGI Symbol;Acc:MGI:1915968]	8	123192886	123202803	9918	-	243	257	217	243	275	176	318	332	336	252	237	249	173	285	120	225	190
ENSMUSG00000014496	ENSMUST00000014640;ENSMUST00000226963;ENSMUST00000227083;ENSMUST00000227089;ENSMUST00000227307;ENSMUST00000227613;ENSMUST00000227863;ENSMUST00000227878;ENSMUST00000227937;ENSMUST00000228037	105522	Ankrd28	ankyrin repeat domain 28 [Source:MGI Symbol;Acc:MGI:2145661]	14	31420725	31552608	131884	-	842	975	802	1053	1061	997	974	1508	1642	1070	922	846	793	914	669	1371	808
ENSMUSG00000014498	ENSMUST00000014642;ENSMUST00000166577;ENSMUST00000167990	237615	Ankrd52	ankyrin repeat domain 52 [Source:MGI Symbol;Acc:MGI:2444029]	10	128212984	128244573	31590	+	589	459	651	284	263	54	725	945	102	59	591	858	641	866	126	669	235
ENSMUSG00000014503	ENSMUST00000014647;ENSMUST00000166156;ENSMUST00000235732;ENSMUST00000236131	53871	Pkd2l2	polycystic kidney disease 2-like 2 [Source:MGI Symbol;Acc:MGI:1858231]	18	34541542	34577169	35628	+	11	9	17	8	9	9	9	3	9	8	8	10	14	18	1	4	3
ENSMUSG00000014504	ENSMUST00000072576;ENSMUST00000119329;ENSMUST00000126518;ENSMUST00000131713;ENSMUST00000140279;ENSMUST00000142010	66384	Srp19	signal recognition particle 19 [Source:MGI Symbol;Acc:MGI:1913634]	18	34463900	34469652	5753	+	370	364	378	487	397	589	487	500	1086	707	413	585	405	456	253	396	293
ENSMUSG00000014542	ENSMUST00000014686;ENSMUST00000137647	51811	Clec4f	C-type lectin domain family 4, member f [Source:MGI Symbol;Acc:MGI:1859834]	6	83621524	83633169	11646	-	1374	1403	1321	1453	1171	2028	413	2766	1483	707	496	1329	724	1338	687	614	597
ENSMUSG00000014547	ENSMUST00000014691;ENSMUST00000224948	268752	Wdfy2	WD repeat and FYVE domain containing 2 [Source:MGI Symbol;Acc:MGI:2442811]	14	63075127	63198958	123832	+	669	648	655	562	543	307	841	1060	552	295	550	730	601	723	252	772	405
ENSMUSG00000014550	ENSMUST00000014694;ENSMUST00000124635;ENSMUST00000138041;ENSMUST00000141332;ENSMUST00000203516;ENSMUST00000204858	78287	Rbsn	rabenosyn, RAB effector [Source:MGI Symbol;Acc:MGI:1925537]	6	92163693	92191906	28214	-	309	288	284	274	236	148	351	379	267	188	306	431	300	389	146	365	171
ENSMUSG00000014551	ENSMUST00000014695;ENSMUST00000134132;ENSMUST00000140438	64658	Mrps25	mitochondrial ribosomal protein S25 [Source:MGI Symbol;Acc:MGI:1928140]	6	92146506	92161014	14509	-	269	312	281	323	329	348	356	359	581	360	308	289	236	311	164	223	204
ENSMUSG00000014554	ENSMUST00000014698;ENSMUST00000113888;ENSMUST00000138941;ENSMUST00000145455;ENSMUST00000147060;ENSMUST00000153415;ENSMUST00000206397;ENSMUST00000206974	27369	Dguok	deoxyguanosine kinase [Source:MGI Symbol;Acc:MGI:1351602]	6	83457199	83483951	26753	-	212	252	240	254	258	255	285	295	420	281	230	269	179	252	129	230	163
ENSMUSG00000014592	ENSMUST00000049790;ENSMUST00000097774;ENSMUST00000105668;ENSMUST00000105670;ENSMUST00000131948;ENSMUST00000135780;ENSMUST00000140030;ENSMUST00000143434;ENSMUST00000153938;ENSMUST00000155685;ENSMUST00000185034	100072	Camta1	calmodulin binding transcription activator 1 [Source:MGI Symbol;Acc:MGI:2140230]	4	151143982	151946333	802352	-	96	83	68	94	72	94	64	98	192	104	69	75	70	82	38	76	61
ENSMUSG00000014599	ENSMUST00000014743;ENSMUST00000118593;ENSMUST00000120243;ENSMUST00000120654;ENSMUST00000153114;ENSMUST00000155557;ENSMUST00000156820	12977	Csf1	colony stimulating factor 1 (macrophage) [Source:MGI Symbol;Acc:MGI:1339753]	3	107648364	107667785	19422	-	151	147	156	144	112	79	1103	2885	772	120	378	323	168	258	41	148	84
ENSMUSG00000014601	ENSMUST00000064759;ENSMUST00000196416;ENSMUST00000197192;ENSMUST00000198424;ENSMUST00000200049	229707	Strip1	striatin interacting protein 1 [Source:MGI Symbol;Acc:MGI:2443884]	3	107519848	107539010	19163	-	364	308	332	325	297	163	378	483	256	138	314	515	376	518	122	339	162
ENSMUSG00000014606	ENSMUST00000014750;ENSMUST00000134804;ENSMUST00000136383;ENSMUST00000139638;ENSMUST00000157076	67863	Slc25a11	solute carrier family 25 (mitochondrial carrier oxoglutarate carrier), member 11 [Source:MGI Symbol;Acc:MGI:1915113]	11	70535022	70538305	3284	-	1481	1826	1518	2010	1657	1612	1728	2111	2840	1969	1967	1409	1337	1741	1038	1826	1383
ENSMUSG00000014633	ENSMUST00000078589;ENSMUST00000128304;ENSMUST00000131616;ENSMUST00000134356;ENSMUST00000148235;ENSMUST00000150128;ENSMUST00000155260	66531	Cmc2	C-X9-C motif containing 2 [Source:MGI Symbol;Acc:MGI:1913781]	8	117615424	117648194	32771	-	191	183	189	185	180	197	253	279	311	198	198	178	152	187	89	130	90
ENSMUSG00000014668	ENSMUST00000014812;ENSMUST00000112519;ENSMUST00000197005;ENSMUST00000197010;ENSMUST00000197968;ENSMUST00000198066;ENSMUST00000198633;ENSMUST00000199283;ENSMUST00000199557;ENSMUST00000199672;ENSMUST00000199811;ENSMUST00000200038	231600	Chfr	checkpoint with forkhead and ring finger domains [Source:MGI Symbol;Acc:MGI:2444898]	5	110283708	110319838	36131	+	403	479	433	462	445	375	451	498	538	348	357	465	359	483	280	477	370
ENSMUSG00000014748	ENSMUST00000014892;ENSMUST00000125614;ENSMUST00000137773;ENSMUST00000138192	21766	Tex261	testis expressed gene 261 [Source:MGI Symbol;Acc:MGI:1096575]	6	83745867	83752795	6929	-	1640	1692	1764	1535	1551	955	2175	1854	1713	1346	2078	1639	1414	1993	790	1265	952
ENSMUSG00000014763	ENSMUST00000055352;ENSMUST00000231274;ENSMUST00000231318	67544	Fam120b	family with sequence similarity 120, member B [Source:MGI Symbol;Acc:MGI:1914794]	17	15616464	15653845	37382	+	415	426	415	515	453	354	709	789	677	404	528	559	487	540	309	734	423
ENSMUSG00000014767	ENSMUST00000014911;ENSMUST00000117593;ENSMUST00000118001;ENSMUST00000119879;ENSMUST00000143924;ENSMUST00000147081;ENSMUST00000149518;ENSMUST00000153480;ENSMUST00000155051;ENSMUST00000159197;ENSMUST00000162505;ENSMUST00000232661	21374	Tbp	TATA box binding protein [Source:MGI Symbol;Acc:MGI:101838]	17	15720150	15748641	28492	+	238	231	228	274	232	230	264	277	397	265	226	230	182	239	184	355	232
ENSMUSG00000014769	ENSMUST00000014913;ENSMUST00000231341;ENSMUST00000231696;ENSMUST00000232500	19170	Psmb1	proteasome (prosome, macropain) subunit, beta type 1 [Source:MGI Symbol;Acc:MGI:104884]	17	15695283	15720013	24731	-	2943	3463	2671	4037	3653	4204	3092	3417	6395	4005	2943	3053	2538	3469	2729	2842	2867
ENSMUSG00000014771	ENSMUST00000054450;ENSMUST00000125709;ENSMUST00000137233;ENSMUST00000139610;ENSMUST00000154293;ENSMUST00000232149	18567	Pdcd2	programmed cell death 2 [Source:MGI Symbol;Acc:MGI:104643]	17	15739470	15747563	8094	-	304	336	252	472	401	536	334	383	857	670	314	321	248	291	320	270	260
ENSMUSG00000014773	ENSMUST00000014917;ENSMUST00000124196;ENSMUST00000129395;ENSMUST00000140784;ENSMUST00000143460;ENSMUST00000152416	13388	Dll1	delta like canonical Notch ligand 1 [Source:MGI Symbol;Acc:MGI:104659]	17	15587616	15597134	9519	-	81	90	148	68	66	36	125	115	53	47	143	107	112	104	43	138	52
ENSMUSG00000014776	ENSMUST00000014920	78688	Nol3	nucleolar protein 3 (apoptosis repressor with CARD domain) [Source:MGI Symbol;Acc:MGI:1925938]	8	106002772	106008571	5800	+	14	22	25	26	22	25	48	27	41	17	68	17	14	21	11	22	6
ENSMUSG00000014778	ENSMUST00000014922;ENSMUST00000132777;ENSMUST00000134837;ENSMUST00000136439	234686	Fhod1	formin homology 2 domain containing 1 [Source:MGI Symbol;Acc:MGI:2679008]	8	106055795	106074585	18791	-	127	106	120	104	86	61	247	296	136	49	143	148	125	137	30	116	55
ENSMUSG00000014786	ENSMUST00000073149;ENSMUST00000212772	277973	Slc9a5	solute carrier family 9 (sodium/hydrogen exchanger), member 5 [Source:MGI Symbol;Acc:MGI:2685542]	8	106075475	106096513	21039	+	7	6	5	16	13	10	28	32	23	4	25	8	6	10	5	6	11
ENSMUSG00000014791	ENSMUST00000109375;ENSMUST00000212033;ENSMUST00000212046;ENSMUST00000212345;ENSMUST00000212655	234683	Elmo3	engulfment and cell motility 3 [Source:MGI Symbol;Acc:MGI:2679007]	8	106032233	106037392	5160	+	549	625	511	577	499	410	568	610	602	378	532	556	454	603	409	448	374
ENSMUSG00000014837	ENSMUST00000014981;ENSMUST00000171788;ENSMUST00000212219;ENSMUST00000212529;ENSMUST00000212922	74356	Matcap1	microtubule associated tyrosine carboxypeptidase 1 [Source:MGI Symbol;Acc:MGI:1921606]	8	106007041	106016496	9456	-	29	30	37	18	14	12	46	50	14	11	38	55	36	51	15	29	11
ENSMUSG00000014846	ENSMUST00000014990;ENSMUST00000176419;ENSMUST00000177126	67971	Tppp3	tubulin polymerization-promoting protein family member 3 [Source:MGI Symbol;Acc:MGI:1915221]	8	106194125	106198158	4034	-	4	1	0	5	5	2	15	9	28	7	7	2	6	7	2	3	1
ENSMUSG00000014850	ENSMUST00000022220;ENSMUST00000185852;ENSMUST00000186392;ENSMUST00000186878;ENSMUST00000187424;ENSMUST00000187831;ENSMUST00000187874;ENSMUST00000189376;ENSMUST00000190393;ENSMUST00000190462;ENSMUST00000190761;ENSMUST00000191242;ENSMUST00000191304;ENSMUST00000191509;ENSMUST00000191550	17686	Msh3	mutS homolog 3 [Source:MGI Symbol;Acc:MGI:109519]	13	92348380	92491511	143132	-	357	333	290	277	295	186	335	421	370	211	282	302	289	420	187	460	215
ENSMUSG00000014852	ENSMUST00000014996;ENSMUST00000102891;ENSMUST00000147216	279028	Adamts13	ADAM metallopeptidase with thrombospondin type 1 motif 13 [Source:MGI Symbol;Acc:MGI:2685556]	2	26863428	26899640	36213	+	61	73	95	62	33	22	15	66	26	28	34	96	87	97	36	81	41
ENSMUSG00000014856	ENSMUST00000015000;ENSMUST00000098453;ENSMUST00000109372;ENSMUST00000126705;ENSMUST00000153146	66320	Tmem208	transmembrane protein 208 [Source:MGI Symbol;Acc:MGI:1913570]	8	106052986	106061851	8866	+	551	569	537	829	716	1353	593	495	1798	1539	629	675	493	637	578	401	628
ENSMUSG00000014859	ENSMUST00000015003;ENSMUST00000212037;ENSMUST00000212572	104394	E2f4	E2F transcription factor 4 [Source:MGI Symbol;Acc:MGI:103012]	8	106024295	106032002	7708	+	335	291	373	322	294	167	497	475	308	199	403	606	360	430	138	368	212
ENSMUSG00000014867	ENSMUST00000015011;ENSMUST00000153641;ENSMUST00000154651	20932	Surf4	surfeit gene 4 [Source:MGI Symbol;Acc:MGI:98445]	2	26810052	26823940	13889	-	6024	5837	5670	5320	4789	3724	7000	6842	4598	3245	5777	8117	6533	7682	2487	4704	3002
ENSMUSG00000014873	ENSMUST00000015017;ENSMUST00000125408;ENSMUST00000126947;ENSMUST00000135506;ENSMUST00000143098;ENSMUST00000157066	20931	Surf2	surfeit gene 2 [Source:MGI Symbol;Acc:MGI:98444]	2	26806379	26810195	3817	+	258	221	272	256	220	241	243	313	394	287	260	244	162	235	170	289	190
ENSMUSG00000014905	ENSMUST00000015049;ENSMUST00000220421	27362	Dnajb9	DnaJ heat shock protein family (Hsp40) member B9 [Source:MGI Symbol;Acc:MGI:1351618]	12	44252342	44257109	4768	-	1106	1201	1094	1498	1539	1987	2678	1817	4031	3914	1797	5696	2878	2587	1028	2280	1166
ENSMUSG00000014907	ENSMUST00000118009;ENSMUST00000212916	234344	Naf1	nuclear assembly factor 1 ribonucleoprotein [Source:MGI Symbol;Acc:MGI:2682306]	8	67312869	67343216	30348	+	114	117	106	108	106	92	129	169	137	78	128	139	120	126	65	144	80
ENSMUSG00000014932	ENSMUST00000072311;ENSMUST00000168707;ENSMUST00000200779;ENSMUST00000200999;ENSMUST00000202543	22612	Yes1	YES proto-oncogene 1, Src family tyrosine kinase [Source:MGI Symbol;Acc:MGI:99147]	5	32768515	32844401	75887	+	666	812	758	873	772	851	681	826	1197	998	592	540	505	641	586	924	615
ENSMUSG00000014956	ENSMUST00000015100;ENSMUST00000201207;ENSMUST00000201360;ENSMUST00000201600;ENSMUST00000201880;ENSMUST00000202078	19046	Ppp1cb	protein phosphatase 1 catalytic subunit beta [Source:MGI Symbol;Acc:MGI:104871]	5	32616187	32674777	58591	+	2458.7	2775	2552	3444	3001	3771	2543	3278	6257	4781	2347	2481	2267	2686	2256	3156.29	2366
ENSMUSG00000014959	ENSMUST00000028509;ENSMUST00000112201;ENSMUST00000112205;ENSMUST00000130970;ENSMUST00000133432;ENSMUST00000136485	70231	Gorasp2	golgi reassembly stacking protein 2 [Source:MGI Symbol;Acc:MGI:2135962]	2	70491920	70542980	51061	+	2334	2331	1936	2240	1990	1419	2595	2949	2120	1287	1823	3066	2472	2874	1053	1942	1310
ENSMUSG00000014980	ENSMUST00000015124;ENSMUST00000159270;ENSMUST00000159717;ENSMUST00000161717;ENSMUST00000162371;ENSMUST00000163027;ENSMUST00000188105	66637	Tsen15	tRNA splicing endonuclease subunit 15 [Source:MGI Symbol;Acc:MGI:1913887]	1	152246486	152262439	15954	-	104	129	122	200	150	237	137	120	337	272	118	130	138	150	81	123	135
ENSMUSG00000015002	ENSMUST00000015146;ENSMUST00000096411;ENSMUST00000172756;ENSMUST00000173008;ENSMUST00000173858;ENSMUST00000173936;ENSMUST00000174135;ENSMUST00000174591;ENSMUST00000174601;ENSMUST00000174615;ENSMUST00000174749;ENSMUST00000174856;ENSMUST00000211878;ENSMUST00000227340	76740	Efr3a	EFR3 homolog A [Source:MGI Symbol;Acc:MGI:1923990]	15	65658883	65745665	86783	+	1262	1172	1184	1239	1222	940	1309.22	1349	1454	1012	1016	1336	1196	1470	883	1619	1014
ENSMUSG00000015013	ENSMUST00000015157;ENSMUST00000211904;ENSMUST00000212477	59005	Trappc2l	trafficking protein particle complex 2L [Source:MGI Symbol;Acc:MGI:1916295]	8	123338379	123343399	5021	+	236	246	247	341	320	353	319	328	606	389	308	266	186	311	209	224	214
ENSMUSG00000015016	ENSMUST00000015160;ENSMUST00000212781;ENSMUST00000212790;ENSMUST00000212903	257633	Acsf3	acyl-CoA synthetase family member 3 [Source:MGI Symbol;Acc:MGI:2182591]	8	123502225	123544619	42395	+	750	820	701	733	553	363	784	787	540	330	844	734	752	951	354	746	461
ENSMUSG00000015023	ENSMUST00000040416;ENSMUST00000130133;ENSMUST00000173183	13680	Ddx19a	DEAD box helicase 19a [Source:MGI Symbol;Acc:MGI:99526]	8	111701628	111724432	22805	-	641.83	714.11	641.45	767.14	692.03	761.61	661.7	853.06	1179.84	787.73	596.63	764.86	553.38	778.3	534.9	629.54	500.57
ENSMUSG00000015027	ENSMUST00000015171;ENSMUST00000211906;ENSMUST00000212319	50917	Galns	galactosamine (N-acetyl)-6-sulfatase [Source:MGI Symbol;Acc:MGI:1355303]	8	123304981	123338202	33222	-	239	231	224	219	216	127	451	424	198	107	520	224	169	270	79	254	111
ENSMUSG00000015053	ENSMUST00000015197;ENSMUST00000170089;ENSMUST00000203480;ENSMUST00000203579;ENSMUST00000205151	14461	Gata2	GATA binding protein 2 [Source:MGI Symbol;Acc:MGI:95662]	6	88170873	88184014	13142	+	11	18	13	11	4	4	23	21	10	7	12	17	7	20	4	10	7
ENSMUSG00000015083	ENSMUST00000015227;ENSMUST00000040042;ENSMUST00000133255;ENSMUST00000149062;ENSMUST00000150580;ENSMUST00000153139;ENSMUST00000154984	69379	C8g	complement component 8, gamma polypeptide [Source:MGI Symbol;Acc:MGI:88237]	2	25388663	25391731	3069	-	8490	8871	6804	10409	9535	11647	5081	5942	12717	9354	4828	7239	6770	9239	6797	6156	7063
ENSMUSG00000015085	ENSMUST00000028328;ENSMUST00000140590;ENSMUST00000148859	12496	Entpd2	ectonucleoside triphosphate diphosphohydrolase 2 [Source:MGI Symbol;Acc:MGI:1096863]	2	25285886	25291333	5448	+	77	92	54	78	96	40	130	150	62	30	211	63	61	92	36	63	55
ENSMUSG00000015087	ENSMUST00000058137;ENSMUST00000128942;ENSMUST00000135084;ENSMUST00000140635;ENSMUST00000140778;ENSMUST00000140785;ENSMUST00000143855;ENSMUST00000146012;ENSMUST00000150206	227624	Rabl6	RAB, member RAS oncogene family-like 6 [Source:MGI Symbol;Acc:MGI:2442633]	2	25473030	25498533	25504	-	439	437	424	488	406	346	637	643	690	502	553	685	417	545	276	672	400
ENSMUSG00000015090	ENSMUST00000015234;ENSMUST00000114251;ENSMUST00000114259;ENSMUST00000137417;ENSMUST00000144016	19215	Ptgds	prostaglandin D2 synthase (brain) [Source:MGI Symbol;Acc:MGI:99261]	2	25356721	25360058	3338	-	47	32	66	16	47	32	49	39	54	70	73	41	34	40	16	10	21
ENSMUSG00000015092	ENSMUST00000015236;ENSMUST00000134689;ENSMUST00000142288;ENSMUST00000144395;ENSMUST00000153008	59022	Edf1	endothelial differentiation-related factor 1 [Source:MGI Symbol;Acc:MGI:1891227]	2	25447859	25452094	4236	+	2840	3323	2739	3189	2928	2662	2757	2986	4209	2784	2424	2671	2241	3228	1756	1700	1911
ENSMUSG00000015094	ENSMUST00000055921;ENSMUST00000071442;ENSMUST00000124277;ENSMUST00000128144;ENSMUST00000131185;ENSMUST00000132287;ENSMUST00000133409;ENSMUST00000136138;ENSMUST00000138651;ENSMUST00000141106;ENSMUST00000141567;ENSMUST00000144413;ENSMUST00000154809;ENSMUST00000156824	18146	Npdc1	neural proliferation, differentiation and control 1 [Source:MGI Symbol;Acc:MGI:1099802]	2	25289363	25299506	10144	+	58	60	111	66	72	44	198	94	63	77	212	75	50	66	28	40	40
ENSMUSG00000015095	ENSMUST00000015239;ENSMUST00000124258;ENSMUST00000124375;ENSMUST00000126601;ENSMUST00000129104;ENSMUST00000135456;ENSMUST00000135511;ENSMUST00000142004;ENSMUST00000148845	30839	Fbxw5	F-box and WD-40 domain protein 5 [Source:MGI Symbol;Acc:MGI:1354731]	2	25390762	25395483	4722	+	841	813	785	728	645	395	965	1016	566	334	828	974	824	1168	396	778	554
ENSMUSG00000015112	ENSMUST00000015256;ENSMUST00000177698;ENSMUST00000188414;ENSMUST00000203551;ENSMUST00000203990	50799	Slc25a13	solute carrier family 25 (mitochondrial carrier, adenine nucleotide translocator), member 13 [Source:MGI Symbol;Acc:MGI:1354721]	6	6041218	6217173	175956	-	4920	5835	4692	5858	4593	4968	3991	5177	7656	5848	4531	3868	4212	5212	4562	5673	4427
ENSMUSG00000015120	ENSMUST00000049911;ENSMUST00000172462;ENSMUST00000172520;ENSMUST00000172569;ENSMUST00000172587;ENSMUST00000172868;ENSMUST00000173084;ENSMUST00000173231;ENSMUST00000173621;ENSMUST00000173713;ENSMUST00000174001;ENSMUST00000174031;ENSMUST00000249681;ENSMUST00000249682;ENSMUST00000249683;ENSMUST00000249684;ENSMUST00000249685;ENSMUST00000249686;ENSMUST00000249687;ENSMUST00000249688;ENSMUST00000249689;…	22196	Ube2i	ubiquitin-conjugating enzyme E2I [Source:MGI Symbol;Acc:MGI:107365]	17	25479482	25493856	14375	-	2108	2353	2194.87	2303.81	1890	1609	2470.82	2936.93	2754.94	1752	2088	2275	1768.91	2484.96	1189.97	2313.46	1636.97
ENSMUSG00000015126	ENSMUST00000063574;ENSMUST00000249827;ENSMUST00000249828;ENSMUST00000249829;ENSMUST00000249830;ENSMUST00000249831;ENSMUST00000249832;ENSMUST00000249833;ENSMUST00000249834;ENSMUST00000249835;ENSMUST00000249836;ENSMUST00000249837;ENSMUST00000249838;ENSMUST00000249839;ENSMUST00000249840;ENSMUST00000249841;ENSMUST00000249842	68327	Tsr3	TSR3 20S rRNA accumulation [Source:MGI Symbol;Acc:MGI:1915577]	17	25459141	25461773	2633	+	246	317	265	347	264	303	343	307	428	285	287	334	265	343	170	195	196
ENSMUSG00000015127	ENSMUST00000015271;ENSMUST00000039734;ENSMUST00000160785;ENSMUST00000160896;ENSMUST00000161679;ENSMUST00000162498;ENSMUST00000162838	74154	Unkl	unkempt family like zinc finger [Source:MGI Symbol;Acc:MGI:1921404]	17	25407371	25453417	46047	+	400	430	462	660	583	466	541	527	716	394	426	793	644	715	245	481	340
ENSMUSG00000015133	ENSMUST00000015277;ENSMUST00000130438;ENSMUST00000131239;ENSMUST00000137181;ENSMUST00000145954;ENSMUST00000154893;ENSMUST00000167705	233328	Lrrk1	leucine-rich repeat kinase 1 [Source:MGI Symbol;Acc:MGI:2142227]	7	65876660	66038098	161439	-	306	330	319	290	245	146	516	756	329	188	485	348	384	456	115	400	191
ENSMUSG00000015134	ENSMUST00000015278;ENSMUST00000173756;ENSMUST00000174209;ENSMUST00000174215;ENSMUST00000174701	56847	Aldh1a3	aldehyde dehydrogenase family 1, subfamily A3 [Source:MGI Symbol;Acc:MGI:1861722]	7	66040638	66077265	36628	-	5	8	7	3	3	3	7	8	7	5	8	13	5	8	6	17	3
ENSMUSG00000015143	ENSMUST00000021554;ENSMUST00000167327;ENSMUST00000217984;ENSMUST00000218874;ENSMUST00000219382;ENSMUST00000219634;ENSMUST00000220351	109711	Actn1	actinin, alpha 1 [Source:MGI Symbol;Acc:MGI:2137706]	12	80214321	80307145	92825	-	785	833	703	732	608	370	1293	1711	730	384	1207	637	510	580	331	1065	519
ENSMUSG00000015149	ENSMUST00000072965;ENSMUST00000122915;ENSMUST00000127953;ENSMUST00000128961;ENSMUST00000132789;ENSMUST00000141077;ENSMUST00000153956;ENSMUST00000155327;ENSMUST00000170068;ENSMUST00000207322	64383	Sirt2	sirtuin 2 [Source:MGI Symbol;Acc:MGI:1927664]	7	28466160	28488086	21927	+	1285	1214	1246	837	850	403	1329	1326	677	381	1124	1146	993	1268	426	874	629
ENSMUSG00000015165	ENSMUST00000038572;ENSMUST00000172529;ENSMUST00000172841;ENSMUST00000172884;ENSMUST00000173578;ENSMUST00000173750;ENSMUST00000173818;ENSMUST00000174396;ENSMUST00000174477;ENSMUST00000174526;ENSMUST00000174548;ENSMUST00000174755;ENSMUST00000174882	15388	Hnrnpl	heterogeneous nuclear ribonucleoprotein L [Source:MGI Symbol;Acc:MGI:104816]	7	28507966	28521691	13726	+	1941	1980	1813	1978	1919	1501	2268	2620	2693	1602	2190	1975	1501	2110	1222	1847	1304
ENSMUSG00000015176	ENSMUST00000165017;ENSMUST00000223683;ENSMUST00000223728;ENSMUST00000223741;ENSMUST00000224434;ENSMUST00000224490;ENSMUST00000225758;ENSMUST00000225780;ENSMUST00000235620	70769	Nolc1	nucleolar and coiled-body phosphoprotein 1 [Source:MGI Symbol;Acc:MGI:1918019]	19	46064302	46073969	9668	+	553	494	507	368	314	226	645	621	385	267	674	1075	590	670	224	902	297
ENSMUSG00000015189	ENSMUST00000015333;ENSMUST00000141359;ENSMUST00000153963;ENSMUST00000181734;ENSMUST00000204372	213819	Casd1	CAS1 domain containing 1 [Source:MGI Symbol;Acc:MGI:2384865]	6	4600839	4643355	42517	+	867	767	819	777	636	504	667	860	642	470	654	760	712	874	492	1022	529
ENSMUSG00000015202	ENSMUST00000015346;ENSMUST00000150282	215748	Cnksr3	Cnksr family member 3 [Source:MGI Symbol;Acc:MGI:2674130]	10	7069063	7162237	93175	-	166	164	152	144	140	113	212	203	148	161	159	345	239	302	47	93	66
ENSMUSG00000015214	ENSMUST00000015358;ENSMUST00000114601;ENSMUST00000130179;ENSMUST00000130909;ENSMUST00000132837;ENSMUST00000138565;ENSMUST00000146213;ENSMUST00000149323;ENSMUST00000156307;ENSMUST00000156756	53332	Mtmr1	myotubularin related protein 1 [Source:MGI Symbol;Acc:MGI:1858271]	X	70408366	70462802	54437	+	887	877	744	807	807	477	831	1191	853	549	920	937	817	1129	613	1369	639
ENSMUSG00000015217	ENSMUST00000015361;ENSMUST00000072699;ENSMUST00000088874;ENSMUST00000114582;ENSMUST00000123100;ENSMUST00000132145	15354	Hmgb3	high mobility group box 3 [Source:MGI Symbol;Acc:MGI:1098219]	X	70599524	70604282	4759	+	287	326	303	519	403	448	407	467	775	489.99	433	213	220	307	280.89	334	265
[truncated: 14,203 more rows]

## Sheet: Supplementary_Table2
Gene	Forward primer (5′–3′)	Reverse primer (5′–3′)
Cdkn2c	CCTTGGGGGAACGAGTTGG	AAATTGGGATTAGCACCTCTGAG
H2ax	AACGACGAGGAGCTCAACAAGC	TGGCGCTGCTCTTCTTGGGCA
Gadd45b	GGAGACATTGGGCACAACCGAA	CTGCTCTCTTCACAGTAACTGGC
Fgd3	GGATCGAGTCCAGAAAGTCGT	CAGCTTGCAGCGATACCTCC
Arhgap11a	GTCTATGGCATTAAGGTCAAGGG	TCTGGAACGACTGAATGAGGC
Rab3b	AGAGTGGTCCCAACTGAGAAG	CGAGTCAGACATCTTATCGCAG
Csf1	GGCATCATCCTAGTCTTGCTGACT	CCCCACAGAAGAATCCAATGTC
Icam1	AAACCAGACCCTGGAACTGCAC	GCCTGGCATTTCAGAGTCTGCT
[truncated: 1 more rows]
